# Supplementary material for: Dithiane-directed Rh(iii)-catalyzed amidation of unactivated C(sp3)–H bonds
Source: PubMed Central journal article supplement (PMC6457195; doi:10.1039/c8sc05225e), 2019-02-18

## Supporting Information

### Dithiane-Directed Rh(III)-Catalyzed Amidation of Unactivated C(sp<sup>3</sup>)-H Bonds

Heyao Shi, Darren J. Dixon\*

Department of Chemistry

Chemistry Research Laboratory

University of Oxford

Mansfield Road

Oxford, OX1 3TA

Email: darren.dixon@chem.ox.ac.uk

## Contents

|                                                                               |    |
|-------------------------------------------------------------------------------|----|
| 1. General Methods and Materials .....                                        | 6  |
| 2. Appendix.....                                                              | 7  |
| 2.1. Time Studies .....                                                       | 7  |
| 2.2. Unsuccessful Electrophile Examples .....                                 | 7  |
| 2.3. Poorly Reactive Substrate Examples .....                                 | 7  |
| Experimental Procedures .....                                                 | 8  |
| 1.1. General Procedure A: Synthesis of Dioxazolones from Acid Chlorides ..... | 8  |
| 1.1.1. Compound 2a .....                                                      | 8  |
| 1.1.2. Compound 2b.....                                                       | 8  |
| 1.1.3. Compound 2c .....                                                      | 8  |
| 1.1.4. Compound 2d.....                                                       | 8  |
| 1.1.5. Compound 2e .....                                                      | 9  |
| 1.1.6. Compound 2f.....                                                       | 9  |
| 1.1.7. Compound 2g.....                                                       | 9  |
| 1.1.8. Compound 2h.....                                                       | 9  |
| 1.1.9. Compound 2i.....                                                       | 10 |
| 1.1.10. Compound 2j.....                                                      | 10 |
| 1.1.11. Compound 2k.....                                                      | 10 |
| 1.1.12. Compound 2l.....                                                      | 10 |
| 1.1.13. Compound 2m.....                                                      | 11 |
| 1.1.14. Compound 2n.....                                                      | 11 |
| 1.1.15. Compound 2o.....                                                      | 11 |
| 1.2. General Procedure C: Synthesis of Dithianes .....                        | 11 |
| 1.2.1. Compound 1a .....                                                      | 11 |
| 1.2.2. Compound 1b.....                                                       | 12 |
| 1.2.3. Compound 1c .....                                                      | 12 |
| 1.2.4. Compound 1d.....                                                       | 12 |
| 1.2.5. Compound 1e .....                                                      | 13 |
| 1.2.6. Compound 1f.....                                                       | 13 |
| 1.2.7. Compound 1g.....                                                       | 13 |
| 1.2.8. Compound 1h.....                                                       | 13 |
| 1.2.9. Compound 1i.....                                                       | 14 |

|         |                                                             |    |
|---------|-------------------------------------------------------------|----|
| 1.2.10. | Compound 1j.....                                            | 14 |
| 1.3.    | General Procedure C: Synthesis of Amidated Dithianes 3..... | 14 |
| 1.3.1.  | Compound 3a.....                                            | 15 |
| 1.3.2.  | Compound 3b.....                                            | 15 |
| 1.3.3.  | Compound 3c.....                                            | 15 |
| 1.3.4.  | Compound 3d.....                                            | 16 |
| 1.3.5.  | Compound 3e.....                                            | 16 |
| 1.3.6.  | Compound 3f.....                                            | 16 |
| 1.3.7.  | Compound 3g.....                                            | 17 |
| 1.3.8.  | Compound 3h.....                                            | 17 |
| 1.3.9.  | Compound 3i.....                                            | 17 |
| 1.3.10. | Compound 3j.....                                            | 18 |
| 1.3.11. | Compound 3k.....                                            | 18 |
| 1.3.12. | Compound 3l.....                                            | 18 |
| 1.3.13. | Compound 3m.....                                            | 19 |
| 1.3.14. | Compound 3n.....                                            | 19 |
| 1.3.15. | Compound 3o.....                                            | 19 |
| 1.3.16. | Compound 3p.....                                            | 20 |
| 1.3.17. | Compound 3q.....                                            | 20 |
| 1.3.18. | Compound 3r.....                                            | 20 |
| 1.3.19. | Compound 3s.....                                            | 21 |
| 1.3.20. | Compound 3t.....                                            | 21 |
| 1.3.21. | Compound 3u.....                                            | 21 |
| 1.3.22. | Compound 3v.....                                            | 22 |
| 1.3.23. | Compound 3w.....                                            | 22 |
| 1.3.24. | Compound 3x.....                                            | 22 |
| 1.4.    | Derivatisation.....                                         | 23 |
| 1.4.1.  | Compound 6.....                                             | 23 |
| 1.4.2.  | Compound 7.....                                             | 23 |
| 1.4.3.  | Compound 8.....                                             | 24 |
| 3.      | NMR Spectra.....                                            | 25 |
| 3.1.    | Compound 2b.....                                            | 25 |
| 3.2.    | Compound 2c.....                                            | 28 |
| 3.3.    | Compound 3g.....                                            | 30 |
| 3.4.    | Compound 2g.....                                            | 32 |

|       |                  |     |
|-------|------------------|-----|
| 3.5.  | Compound 2i..... | 34  |
| 3.6.  | Compound 2j..... | 36  |
| 3.7.  | Compound 2k..... | 38  |
| 3.8.  | Compound 2l..... | 40  |
| 3.9.  | Compound 2m..... | 42  |
| 3.10. | Compound 2n..... | 44  |
| 3.11. | Compound 2o..... | 46  |
| 3.12. | Compound 2b..... | 48  |
| 3.13. | Compound 1c..... | 50  |
| 3.14. | Compound 1d..... | 53  |
| 3.15. | Compound 1e..... | 56  |
| 3.16. | Compound 1f..... | 58  |
| 3.17. | Compound 1g..... | 60  |
| 3.18. | Compound 1h..... | 62  |
| 3.19. | Compound 1i..... | 64  |
| 3.20. | Compound 1j..... | 66  |
| 3.21. | Compound 3a..... | 68  |
| 3.22. | Compound 3b..... | 70  |
| 3.23. | Compound 3c..... | 73  |
| 3.24. | Compound 3d..... | 75  |
| 3.25. | Compound 3e..... | 77  |
| 3.26. | Compound 3f..... | 79  |
| 3.27. | Compound 3g..... | 81  |
| 3.28. | Compound 3h..... | 83  |
| 3.29. | Compound 3i..... | 85  |
| 3.30. | Compound 3j..... | 87  |
| 3.31. | Compound 3k..... | 89  |
| 3.32. | Compound 3l..... | 91  |
| 3.33. | Compound 3m..... | 93  |
| 3.34. | Compound 3n..... | 95  |
| 3.35. | Compound 3o..... | 97  |
| 3.36. | Compound 3p..... | 99  |
| 3.37. | Compound 3q..... | 101 |
| 3.38. | Compound 3r..... | 104 |
| 3.39. | Compound 3s..... | 107 |

|       |                   |     |
|-------|-------------------|-----|
| 3.40. | Compound 3u.....  | 111 |
| 3.41. | Compound 3w ..... | 115 |
| 3.42. | Compound 3x.....  | 117 |
| 3.43. | Compound 6.....   | 119 |
| 3.44. | Compound 7.....   | 121 |
| 3.45. | Compound 8.....   | 123 |

## 1. General Methods and Materials

Reactions were carried out under a nitrogen atmosphere in oven-dried glassware at room temperature ( $rt = 20 - 25\text{ }^{\circ}\text{C}$ ) unless stated otherwise. Standard inert atmosphere techniques were used in handling all air and moisture sensitive reagents. Thin-layer chromatography (TLC) was performed using Merck aluminium backed sheets coated with Merck Kieselgel 60 F254 (230-400 mesh) fluorescent treated silica, which were visualised under UV light ( $\lambda_{\text{max}} = 254$  or  $365\text{ nm}$ ). Flash column chromatography was performed using Merck Kieselgel (230-400 mesh). All  $^1\text{H}$  and  $^{13}\text{C}$  NMR spectra were recorded using a Bruker 500 MHz and Bruker 400 MHz spectrometers and are quoted in ppm for measurement against a tetramethylsilane (TMS) or residual solvent peak internal standard. Coupling constants (J) are reported in hertz (Hz), and rounded to the nearest 0.5 Hz. Two-dimensional spectroscopy (COSY, HSQC and HMBC) was used to assist in the assignment and the data is not reported. IR spectra were recorded on a Bruker Tensor 27 FT-IR spectrometer deposited as a thin film. Melting points were recorded using a Leica Galen III hot-stage microscope apparatus and are reported uncorrected in degrees Celsius ( $^{\circ}\text{C}$ ). Low resolution mass spectra were recorded on a Waters LCT premier XE Micromass spectrometer (ESI). High resolution mass spectra (ESI) were recorded on a Bruker MicroTof mass spectrometer. Optical rotations were recorded using a Perkin Elmer 341 polarimeter;  $[\alpha]_{\text{D}}^{\text{T}}$  values are reported in  $10^{-1}\text{ deg}\cdot\text{cm}^2\cdot\text{g}^{-1}$ ; concentrations (c) are quoted in  $\text{g}/100\text{ mL}$ ; D refers to the D-line of sodium (589 nm); temperatures (T) are given in degrees Celsius ( $^{\circ}\text{C}$ ). (+) and (-) compound number prefixes indicate the sign of the optical rotation. The enantiomeric excesses were determined by HPLC analysis on an Agilent 1200 Series instrument or by GC analysis on an Agilent 7820A instrument employing a chiral stationary phase column specified in the individual experiment and by comparing the samples with the appropriate racemic mixtures. Commercial grade reagents and solvents were used without further purification. Anhydrous toluene, tetrahydrofuran and dichloromethane were obtained by filtration through activated alumina (powder  $\sim 150$  mesh, pore size  $58\text{ \AA}$ , basic, Sigma-Aldrich) columns. Other solvents were used directly as received from commercial suppliers.

## 2. Appendix

### 2.1. Time Studies

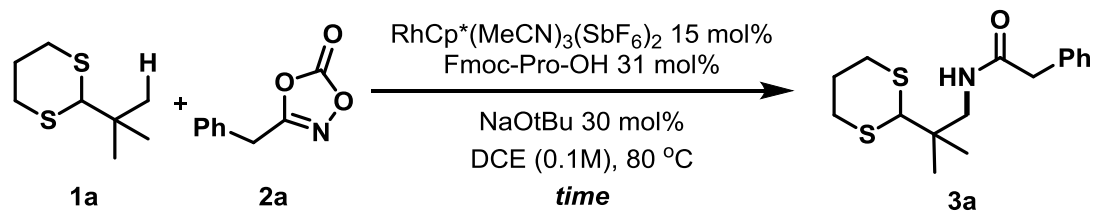

| Entry | Time (h) | Yield (%) |
|-------|----------|-----------|
| 1     | 16       | 63        |
| 2     | 24       | 66        |
| 3     | 36       | 73(71)    |

Table 1: Reaction time optimisation.

### 2.2. Unsuccessful Electrophile Examples

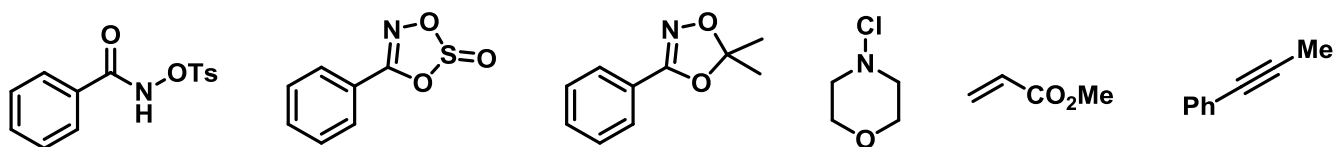

Figure 1: Unsuccessful electrophiles with optimised C-H functionalisation conditions

### 2.3. Poorly Reactive Substrate Examples

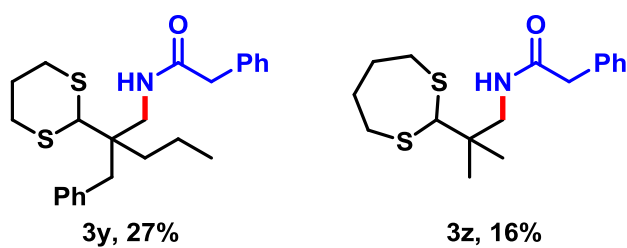

Figure 3: Poorly reactive substrate examples.

## Experimental Procedures

### 1.1. General Procedure A: Synthesis of Dioxazolones from Acid Chlorides

A flask was charged with hydroxylamine hydrochloride (1 equivalent), potassium carbonate (1 equivalent) and solvent (diethyl ether/water; 7.5:1). The reaction was cooled to 0 °C with vigorous stirring before addition of acid chloride (1 equivalent) dropwise. The reaction was stirred overnight, diluted with water and extracted with ethyl acetate. The combined organic layers were washed with brine, dried over anhydrous sodium sulfate and concentrated *in vacuo*. The crude hydroxamic acid product was purified by trituration with pentane/diethyl ether if necessary.

To a slurry of hydroxamic acid (1 equivalent) in dichloromethane was added carbonyl diimidazole (CDI, 1.5 equivalents). The reaction was stirred for 30 minutes, diluted with 1M aqueous HCl and extracted with dichloromethane. The combined organic layers were dried over sodium sulfate, and concentrated *in vacuo* to give dioxazolone **2**. Purification by dissolving in toluene and filtration was performed in necessary.

#### 1.1.1. Compound 2a

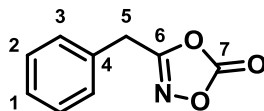

$^1\text{H NMR}$  ( $\text{CDCl}_3$ , 400 MHz)  $\delta_{\text{H}}$  7.42 – 7.33 (m, 3H,  $\text{H}^{1,2}$ ), 7.32 – 7.28 (m, 2H,  $\text{H}^3$ ), 3.93 (s, 2H,  $\text{H}^5$ )  
 $^{13}\text{C NMR}$  ( $\text{CDCl}_3$ , 100 MHz)  $\delta_{\text{C}}$  165.4 ( $\text{C}^6$ ), 154.1 ( $\text{C}^7$ ), 130.6 ( $\text{C}^4$ ), 129.4 ( $\text{C}^3$ ), 129.1 ( $\text{C}^2$ ), 128.6 ( $\text{C}^1$ ), 31.4 ( $\text{C}^5$ ).

Data matches previous literature report. V. Bizet, L. Buglioni, C. Bolm, *Angew. Chem. Int. Ed.* **2014**, 53, 5639.

#### 1.1.2. Compound 2b

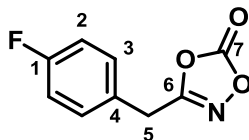

**mp** 39-40 °C

**IR** (film)/ $\text{cm}^{-1}$   $\nu_{\text{max}}$  2917 (C-H), 2849 (C-H), 1861 (C=O), 1828 (C=N).

$^1\text{H NMR}$  ( $\text{CDCl}_3$ , 400 MHz)  $\delta_{\text{H}}$  7.33 – 7.23 (m, 2H,  $\text{H}^2$ ), 7.11 – 7.05 (m, 2H,  $\text{H}^3$ ), 3.91 (s, 2H,  $\text{H}^5$ ).

$^{13}\text{C NMR}$  ( $\text{CDCl}_3$ , 100 MHz)  $\delta_{\text{C}}$  165.3 ( $\text{C}^7$ ), 162.9 (d,  $J = 248$  Hz,  $\text{C}^1$ ), 153.9 ( $\text{C}^6$ ), 130.9 (d,  $J = 8.3$  Hz,  $\text{C}^3$ ), 126.2 (d,  $J = 3.5$  Hz,  $\text{C}^4$ ), 116.3 (d,  $J = 21.9$  Hz,  $\text{C}^2$ ), 30.6 ( $\text{C}^5$ ).

$^{19}\text{F NMR}$  ( $\text{CDCl}_3$ , 400 MHz)  $\delta_{\text{F}}$  -113.1.

**HRMS** ( $\text{EI}^+$ ) exact mass calculated for  $[\text{M}]^+$  ( $\text{C}_9\text{H}_6\text{FNO}_3$ ) requires  $m/z$  195.0326, found  $m/z$  195.0330.

#### 1.1.3. Compound 2c

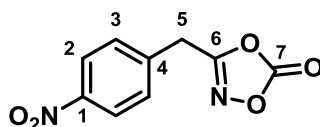

**mp** 89-94 °C.

**IR** (film)/ $\text{cm}^{-1}$   $\nu_{\text{max}}$  2981 (C-H stretch), 1866 (C=O stretch), 1837 (C=N stretch), 1520 (N-O stretch).

$^1\text{H NMR}$  ( $\text{CDCl}_3$ , 400 MHz)  $\delta_{\text{H}}$  8.27 (d,  $J = 8.7$  Hz, 1H,  $\text{H}^2$ ), 7.53 – 7.49 (m, 2H,  $\text{H}^3$ ), 4.07 (s, 2H,  $\text{H}^5$ ).

$^{13}\text{C NMR}$  ( $\text{CDCl}_3$ , 100 MHz)  $\delta_{\text{C}}$  164.2 ( $\text{C}^6$ ), 153.5 ( $\text{C}^7$ ), 148.2 ( $\text{C}^1$ ), 137.5 ( $\text{C}^4$ ), 130.3 ( $\text{C}^2$ ), 124.6 ( $\text{C}^3$ ), 31.1 ( $\text{C}^5$ ).

**HRMS** ( $\text{EI}^+$ ) exact mass calculated for  $[\text{M}+\text{Na}]^+$  ( $\text{C}_9\text{H}_6\text{N}_2\text{O}_5$ ) requires  $m/z$  222.0271, found  $m/z$  222.0278.

#### 1.1.4. Compound 2d



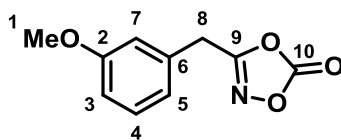

**IR** (film)/cm<sup>-1</sup>  $\nu_{\max}$  2972 (C-H stretch), 1860 (C=O stretch), 1828 (C=N stretch), 1600 (C=C stretch).

**<sup>1</sup>H NMR** (CDCl<sub>3</sub>, 400 MHz)  $\delta_{\text{H}}$  7.30 (dd,  $J = 8.3, 7.6$  Hz, 1H, H<sup>4</sup>), 6.92 – 6.84 (m, 1H, H<sup>3,5</sup>), 6.82 (t,  $J = 2.1$  Hz, 1H, H<sup>7</sup>), 3.90 (s, 2H, H<sup>8</sup>), 3.82 (s, 3H, H<sup>1</sup>).

**<sup>13</sup>C NMR** (CDCl<sub>3</sub>, 100 MHz)  $\delta_{\text{C}}$  165.4 (C<sup>9</sup>), 160.3 (C<sup>10</sup>), 154.0 (C<sup>2</sup>), 131.9 (C<sup>6</sup>), 130.5 (C<sup>4</sup>), 121.3 (C<sup>5</sup>), 115.0 (C<sup>7</sup>), 113.9 (C<sup>3</sup>), 55.5 (C<sup>1</sup>), 31.4 (C<sup>8</sup>).

**HRMS** (EI<sup>+</sup>) exact mass calculated for [M]<sup>+</sup> (C<sub>10</sub>H<sub>9</sub>NO<sub>4</sub>) requires  $m/z$  207.0526, found  $m/z$  207.0531.

### 1.1.5. Compound 2e

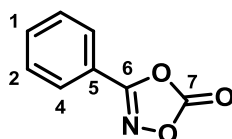

**<sup>1</sup>H NMR** (CDCl<sub>3</sub>, 400 MHz)  $\delta_{\text{H}}$  7.90 – 7.83 (m, 2H, H<sup>4</sup>), 7.69 – 7.61 (m, 1H, H<sup>1</sup>), 7.59 – 7.50 (m, 1H, H<sup>2</sup>).

**<sup>13</sup>C NMR** (CDCl<sub>3</sub>, 100 MHz)  $\delta_{\text{C}}$  163.7 (C<sup>6</sup>), 154.0 (C<sup>7</sup>), 133.9 (C<sup>1</sup>), 129.5 (C<sup>4</sup>), 126.8 (C<sup>2</sup>), 120.3 (C<sup>5</sup>).

Matches literature report: Bolm *et al. Angew. Chem. Int. Ed.* **2014**, *53*, 5639–5642

### 1.1.6. Compound 2f

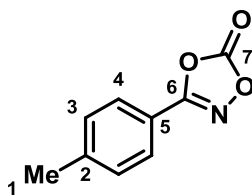

**<sup>1</sup>H NMR** (CDCl<sub>3</sub>, 400 MHz)  $\delta_{\text{H}}$  7.77 – 7.70 (m, 2H, H<sup>4</sup>), 7.34 (d,  $J = 8.1$  Hz, 2H, H<sup>3</sup>), 2.45 (s, 3H, H<sup>1</sup>).

**<sup>13</sup>C NMR** (CDCl<sub>3</sub>, 100 MHz)  $\delta_{\text{C}}$  163.8 (C<sup>6</sup>), 154.1 (C<sup>7</sup>), 145.0 (C<sup>2</sup>), 130.2 (C<sup>3</sup>), 126.7 (C<sup>4</sup>), 117.4 (C<sup>5</sup>), 21.9 (C<sup>1</sup>).

Matches literature report: Bolm *et al. Angew. Chem. Int. Ed.* **2014**, *53*, 5639–5642.

### 1.1.7. Compound 2g

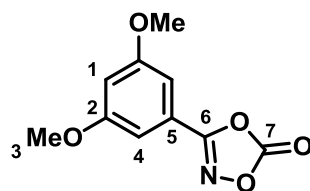

**mp** 89-92 °C.

**IR** (film)/cm<sup>-1</sup>  $\nu_{\max}$  2981 (C-H stretch), 1824 (C=O stretch), 1585 (C=C stretch).

**<sup>1</sup>H NMR** (CDCl<sub>3</sub>, 400 MHz)  $\delta_{\text{H}}$  6.96 (d,  $J = 2.3$  Hz, 2H, H<sup>4</sup>), 6.69 (t,  $J = 2.3$  Hz, 1H, H<sup>1</sup>), 3.84 (s, 6H, H<sup>3</sup>).

**<sup>13</sup>C NMR** (CDCl<sub>3</sub>, 100 MHz)  $\delta_{\text{C}}$  163.7 (C<sup>6</sup>), 161.5 (C<sup>7</sup>), 153.9 (C<sup>2</sup>), 121.7 (C<sup>5</sup>), 106.3 (C<sup>1</sup>), 104.5 (C<sup>4</sup>), 55.9 (C<sup>3</sup>).

**HRMS** (EI<sup>+</sup>) exact mass calculated for [M]<sup>+</sup> (C<sub>10</sub>H<sub>9</sub>NO<sub>5</sub>) requires  $m/z$  223.0475, found  $m/z$  223.0481.

### 1.1.8. Compound 2h

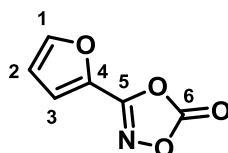

$^1\text{H NMR}$  ( $\text{CDCl}_3$ , 400 MHz)  $\delta_{\text{H}}$  7.72 (dd,  $J = 1.8, 0.8$  Hz, 1H,  $\text{H}^3$ ), 7.19 (dd,  $J = 3.6, 0.8$  Hz, 1H,  $\text{H}^1$ ), 6.66 (dd,  $J = 3.6, 1.8$  Hz, 1H,  $\text{H}^2$ ).

$^{13}\text{C NMR}$  ( $\text{CDCl}_3$ , 100 MHz)  $\delta_{\text{C}}$  156.7 ( $\text{C}^5$ ), 153.2 ( $\text{C}^6$ ), 147.9 ( $\text{C}^3$ ), 135.2 ( $\text{C}^4$ ), 117.9 ( $\text{C}^1$ ), 112.7 ( $\text{C}^2$ ).

Matches literature report: Bolm *et al.* *Angew. Chem. Int. Ed.* **2014**, *53*, 5639–5642.

### 1.1.9. Compound 2i

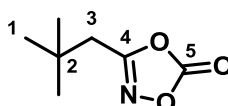

**IR** (film)/ $\text{cm}^{-1}$   $\nu_{\text{max}}$  2964 (C-H stretch), 1878 (C=O stretch), 1832 (C=N stretch), 1630 (N-O stretch).

$^1\text{H NMR}$  ( $\text{CDCl}_3$ , 400 MHz)  $\delta_{\text{H}}$  2.50 (s, 2H,  $\text{H}^3$ ), 1.07 (s, 9H,  $\text{H}^1$ ).

$^{13}\text{C NMR}$  ( $\text{CDCl}_3$ , 100 MHz)  $\delta_{\text{C}}$  165.7 ( $\text{C}^4$ ), 154.4 ( $\text{C}^5$ ), 38.5 ( $\text{C}^3$ ), 31.4 ( $\text{C}^2$ ), 29.5 ( $\text{C}^1$ ).

### 1.1.10. Compound 2j

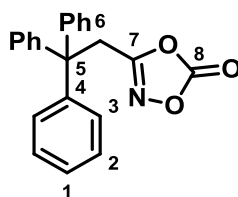

**mp** 98-101 °C

**IR** (film)/ $\text{cm}^{-1}$   $\nu_{\text{max}}$  1867 (C=O stretch), 1828 (C=N stretch), 1627 (C=C stretch).

$^1\text{H NMR}$  ( $\text{CDCl}_3$ , 400 MHz)  $\delta_{\text{H}}$  7.38 – 7.15 (m, 15H,  $\text{H}^{1,2,3,4}$ ), 3.97 (s, 2H,  $\text{H}^6$ ).

$^{13}\text{C NMR}$  ( $\text{CDCl}_3$ , 100 MHz)  $\delta_{\text{C}}$  165.0 ( $\text{C}^7$ ), 153.8 ( $\text{C}^8$ ), 144.8 ( $\text{C}^4$ ), 128.9 ( $\text{C}^3$ ), 128.5 ( $\text{C}^2$ ), 127.2 ( $\text{C}^1$ ), 56.3 ( $\text{C}^5$ ), 37.1 ( $\text{C}^6$ ).

**HRMS** ( $\text{EI}^+$ ) exact mass calculated for  $[\text{M}]^+$  ( $\text{C}_{22}\text{H}_{17}\text{NO}_3$ ) requires  $m/z$  343.1203, found  $m/z$  343.1209.

### 1.1.11. Compound 2k

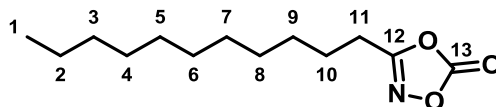

**IR** (film)/ $\text{cm}^{-1}$   $\nu_{\text{max}}$  2924 (C-H stretch), 1869 (C=O stretch), 1829 (C=N stretch), 1637 (N-O stretch).

$^1\text{H NMR}$  ( $\text{CDCl}_3$ , 400 MHz)  $\delta_{\text{H}}$  2.64 – 2.58 (m, 2H,  $\text{H}^{11}$ ), 1.79 – 1.66 (m, 2H,  $\text{H}^{10}$ ), 1.46 – 1.22 (m, 16H,  $\text{H}^{2,3,4,5,6,7,8,9}$ ), 0.93 – 0.83 (m, 3H,  $\text{H}^1$ ).

$^{13}\text{C NMR}$  ( $\text{CDCl}_3$ , 100 MHz)  $\delta_{\text{C}}$  166.9 ( $\text{C}^{12}$ ), 154.4 ( $\text{C}^{13}$ ), 32.0 ( $\text{C}^{2/3/4/5/6/7/8/9}$ ), 29.7 ( $\text{C}^{2/3/4/5/6/7/8/9}$ ), 29.7 ( $\text{C}^{2/3/4/5/6/7/8/9}$ ), 29.6 ( $\text{C}^{2/3/4/5/6/7/8/9}$ ), 29.4 ( $\text{C}^{2/3/4/5/6/7/8/9}$ ), 29.1 ( $\text{C}^{2/3/4/5/6/7/8/9}$ ), 28.8 ( $\text{C}^{2/3/4/5/6/7/8/9}$ ), 24.9 ( $\text{C}^{11}$ ), 24.7 ( $\text{C}^{10}$ ), 22.8 ( $\text{C}^{2/3/4/5/6/7/8/9}$ ), 14.2 ( $\text{C}^1$ ).

### 1.1.12. Compound 2l

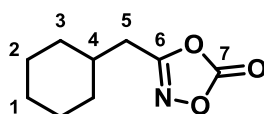

**IR** (film)/ $\text{cm}^{-1}$   $\nu_{\text{max}}$  2926 (C-H stretch), 1859 (C=O stretch), 1826 (C=N stretch), 1633 (N-O stretch).

$^1\text{H NMR}$  ( $\text{CDCl}_3$ , 400 MHz)  $\delta_{\text{H}}$  2.50 (d,  $J = 6.7$  Hz, 2H,  $\text{H}^5$ ), 1.83 – 1.64 (m, 6H,  $\text{H}^4, 1a, 2a, 3a$ ), 1.36 – 1.10 (m, 3H,  $\text{H}^{2b, 3b}$ ), 1.05 (qd,  $J = 11.3, 10.1, 5.6$  Hz, 1H,  $\text{H}^{1b}$ ).

$^{13}\text{C}$  NMR ( $\text{CDCl}_3$ , 100 MHz)  $\delta_{\text{C}}$  166.1 ( $\text{C}^6$ ), 154.4 ( $\text{C}^7$ ), 34.7 ( $\text{C}^4$ ), 32.8 ( $\text{C}^3$ ), 32.2 ( $\text{C}^5$ ), 25.9 ( $\text{C}^1$ ), 25.8 ( $\text{C}^2$ ).

### 1.1.13. Compound 2m

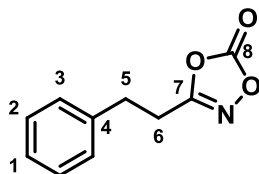

**IR** (film)/ $\text{cm}^{-1}$   $\nu_{\text{max}}$  2981 (C-H stretch), 1867 (C=O stretch), 1827 (C=N stretch).

$^1\text{H}$  NMR ( $\text{CDCl}_3$ , 400 MHz)  $\delta_{\text{H}}$  7.38 – 7.32 (m, 2H,  $\text{H}^2$ ), 7.31 – 7.25 (m, 1H,  $\text{H}^1$ ), 7.24 – 7.20 (m, 2H,  $\text{H}^3$ ), 3.09 – 3.02 (m, 2H,  $\text{H}^6$ ), 2.98 – 2.92 (m, 2H,  $\text{H}^5$ )

$^{13}\text{C}$  NMR ( $\text{CDCl}_3$ , 100 MHz)  $\delta_{\text{C}}$  166.0 ( $\text{C}^7$ ), 154.1 ( $\text{C}^8$ ), 138.1 ( $\text{C}^4$ ), 129.0 ( $\text{C}^2$ ), 128.3 ( $\text{C}^3$ ), 127.3 ( $\text{C}^1$ ), 30.6 ( $\text{C}^6$ ), 26.8 ( $\text{C}^5$ ).

**HRMS** ( $\text{EI}^+$ ) exact mass calculated for  $[\text{M}]^+$  ( $\text{C}_{10}\text{H}_9\text{NO}_3$ ) requires  $m/z$  191.0577, found  $m/z$  191.0578.

### 1.1.14. Compound 2n

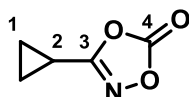

**IR** (film)/ $\text{cm}^{-1}$   $\nu_{\text{max}}$  2917 (C-H stretch), 1881 (C=O stretch), 1827 (C=N stretch), 1630 (N-O stretch).

$^1\text{H}$  NMR ( $\text{CDCl}_3$ , 400 MHz)  $\delta_{\text{H}}$  1.90 (tt,  $J = 8.3, 5.1$  Hz, 1H,  $\text{H}^2$ ), 1.22 – 1.12 (m, 4H,  $\text{H}^1$ )

$^{13}\text{C}$  NMR ( $\text{CDCl}_3$ , 100 MHz)  $\delta_{\text{C}}$  168.0 ( $\text{C}^3$ ), 154.1 ( $\text{C}^4$ ), 7.4 ( $\text{C}^1$ ), 5.5 ( $\text{C}^2$ ).

**HRMS** ( $\text{EI}^+$ ) exact mass calculated for  $[\text{M}]^+$  ( $\text{C}_5\text{H}_5\text{NO}_3$ ) requires  $m/z$  127.0264, found  $m/z$  127.0264.

### 1.1.15. Compound 2o

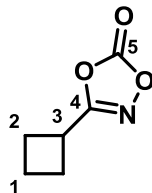

**IR** (film)/ $\text{cm}^{-1}$   $\nu_{\text{max}}$  2954 (C-H stretch), 1871 (C=O stretch), 1827 (C=N stretch), 1626 (N-O stretch).

$^1\text{H}$  NMR ( $\text{CDCl}_3$ , 400 MHz)  $\delta_{\text{H}}$  3.47 (pd,  $J = 8.4, 1.1$  Hz, 1H,  $\text{H}^3$ ), 2.43 – 2.35 (m, 4H,  $\text{H}^2$ ), 2.21 – 2.00 (m, 2H,  $\text{H}^1$ )

$^{13}\text{C}$  NMR ( $\text{CDCl}_3$ , 100 MHz)  $\delta_{\text{C}}$  168.4 ( $\text{C}^4$ ), 154.5 ( $\text{C}^5$ ), 29.5 ( $\text{C}^3$ ), 25.2 ( $\text{C}^2$ ), 19.0 ( $\text{C}^1$ ).

**HRMS** ( $\text{EI}^+$ ) exact mass calculated for  $[\text{M}]^+$  ( $\text{C}_6\text{H}_7\text{NO}_3$ ) requires  $m/z$  141.0420, found  $m/z$  141.0419.

## 1.2. General Procedure C: Synthesis of Dithianes

To a solution of aldehyde (1 equivalent) in dichloromethane cooled to 0 °C, was added potassium tert-butoxide (1.3 equivalents), followed by dropwise addition of electrophile (2 equivalents). The reaction was warmed to room temperature and stirred overnight, followed by addition of 1M HCl. The reaction was extracted with dichloromethane, dried over anhydrous sodium sulfate and concentrated in vacuo. The crude product was purified by flash column chromatography to  $\alpha$ -methylated aldehyde.

To a solution of  $\alpha$ -methylated aldehyde in toluene, was pTSA.H<sub>2</sub>O (0.05 equivalents) and propane dithiol (1.3 equivalents) sequentially. The reaction was purged with nitrogen and heated to 80 °C until full consumption of the aldehyde. The reaction was diluted with diethyl ether and washed twice with 1M aqueous KOH. The organic layers were dried over anhydrous sodium sulfate and concentrated in vacuo. The crude product was purified by flash column chromatography to give desired dithiane.

### 1.2.1. Compound 1a

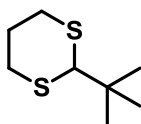

Prepared according to an analogous procedure to General Procedure C. To a solution of trimethylacetaldehyde (3 mL, 27.62 mmol) in toluene (50 mL) was added para-toluenesulfonic acid monohydrate (263 mg, 0.05 eq.), followed by 1,3-propanedithiol (3.61 mL, 1.3 eq.). The reaction was purged with nitrogen and heated to 80 °C overnight. The reaction mixture was diluted with diethyl ether (100 mL) and washed three times with 1M aqueous KOH. The organic layers were washed with brine, dried over anhydrous sodium sulfate and concentrated in vacuo. The crude oil was seeded with a crystal of product, and the crystals were collected and washed with ice methanol to give **1a** as a clear crystalline solid, 4.70g, 96%.

### 1.2.2. Compound 1b

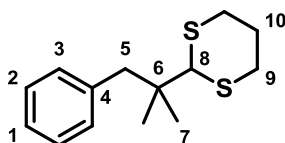

Clear crystalline solid, 23%.

mp 36-40 °C.

IR (film)/cm<sup>-1</sup>  $\nu_{\max}$  2964 (C-H stretch), 1493 (C-S stretch), 1422 (C=C stretch).

<sup>1</sup>H NMR (CDCl<sub>3</sub>, 400 MHz)  $\delta_{\text{H}}$  7.31 – 7.23 (m, 5H, H<sup>1,2,3</sup>), 3.93 (s, 1H, H<sup>8</sup>), 2.96 – 2.82 (m, 4H, H<sup>9</sup>), 2.81 (s, 2H, H<sup>5</sup>), 2.08 (dt, *J* = 13.6, 3.8, 2.8 Hz, 1H, H<sup>10a</sup>), 1.84 (dt, *J* = 14.0, 11.2, 4.6 Hz, 1H, H<sup>10b</sup>), 1.09 (s, 6H, H<sup>7</sup>).

<sup>13</sup>C NMR (CDCl<sub>3</sub>, 100 MHz)  $\delta_{\text{C}}$  138.4 (C<sup>4</sup>), 130.8 (C<sup>3</sup>), 128.0 (C<sup>2</sup>), 126.3 (C<sup>1</sup>), 60.4 (C<sup>8</sup>), 45.7 (C<sup>5</sup>), 39.6 (C<sup>6</sup>), 31.5 (C<sup>9</sup>), 26.3 (C<sup>10</sup>), 25.5 (C<sup>7</sup>).

### 1.2.3. Compound 1c

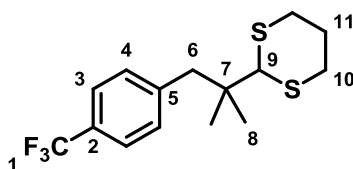

Clear crystalline solid, 19%.

mp 58-59 °C.

IR (film)/cm<sup>-1</sup>  $\nu_{\max}$  2964 (C-H stretch), 2935 (C-H stretch), 2899 (C-H stretch), 1324.

<sup>1</sup>H NMR (CDCl<sub>3</sub>, 400 MHz)  $\delta_{\text{H}}$  7.54 (d, *J* = 8.0 Hz, 2H, H<sup>3</sup>), 7.40 – 7.37 (m, 2H, H<sup>4</sup>), 3.88 (s, 1H, H<sup>9</sup>), 2.95 – 2.82 (m, 6H, H<sup>6,10</sup>), 2.09 (dt, *J* = 13.7, 3.9, 2.8 Hz, 1H, H<sup>11a</sup>), 1.84 (dt, *J* = 14.0, 11.6, 4.1 Hz, 1H, H<sup>11b</sup>), 1.09 (s, 6H, H<sup>8</sup>).

<sup>13</sup>C NMR (CDCl<sub>3</sub>, 100 MHz)  $\delta_{\text{C}}$  142.6 (C<sup>5</sup>), 131.0 (C<sup>4</sup>), 128.9 (C<sup>2</sup>), 125.9 (C<sup>1</sup>), 124.9 (C<sup>3</sup>), 60.1 (C<sup>9</sup>), 45.5 (C<sup>10</sup>), 39.7 (C<sup>7</sup>), 31.4 (C<sup>6</sup>), 26.2 (C<sup>11</sup>), 25.5 (C<sup>8</sup>).

<sup>19</sup>F NMR (CDCl<sub>3</sub>, 400 MHz)  $\delta_{\text{F}}$  -62.34.

HRMS (APCI<sup>+</sup>) exact mass calculated for [M+H]<sup>+</sup> (C<sub>15</sub>H<sub>20</sub>F<sub>3</sub><sup>32</sup>S<sub>2</sub>) requires *m/z* 321.0953, found *m/z* 321.0957.

### 1.2.4. Compound 1d

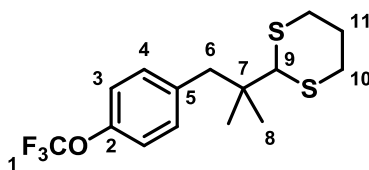

Oil, 17%.

IR (film)/cm<sup>-1</sup>  $\nu_{\max}$  2968 (C-H stretch), 2899 (C-H stretch), 1508 (C-S stretch).

$^1\text{H NMR}$  ( $\text{CDCl}_3$ , 400 MHz)  $\delta_{\text{H}}$  7.30 – 7.27 (m, 2H,  $\text{H}^4$ ), 7.12 (dq,  $J = 7.6, 1.0$  Hz, 2H,  $\text{H}^3$ ), 3.88 (s, 1H,  $\text{H}^9$ ), 2.94 – 2.81 (m, 4H,  $\text{H}^{10}$ ), 2.81 (s, 2H,  $\text{H}^6$ ), 2.09 (dt,  $J = 13.6, 3.9, 2.8$  Hz, 1H,  $\text{H}^{11a}$ ), 1.83 (dt,  $J = 14.0, 11.4, 4.4$  Hz, 1H,  $\text{H}^{11b}$ ), 1.08 (s, 6H,  $\text{H}^8$ ).

$^{13}\text{C NMR}$  ( $\text{CDCl}_3$ , 100 MHz)  $\delta_{\text{C}}$  148.00 (q,  $J = 2.0$  Hz,  $\text{C}^2$ ), 137.09 ( $\text{C}^5$ ), 132.0 ( $\text{C}^4$ ), 120.7 (q,  $J = 257$  Hz,  $\text{C}^1$ ), 120.4 ( $\text{C}^3$ ), 60.1 ( $\text{C}^9$ ), 45.0 ( $\text{C}^6$ ), 39.6 ( $\text{C}^7$ ), 31.4 ( $\text{C}^{10}$ ), 26.2 ( $\text{C}^{11}$ ), 25.5 ( $\text{C}^8$ ).

$^{19}\text{F NMR}$  ( $\text{CDCl}_3$ , 400 MHz)  $\delta_{\text{F}}$  -57.82.

**HRMS** (APCI $^+$ ) exact mass calculated for  $[\text{M}+\text{H}]^+$  ( $\text{C}_{15}\text{H}_{20}\text{OF}_3^{32}\text{S}_2$ ) requires  $m/z$  337.0902, found  $m/z$  337.0906.

### 1.2.5. Compound 1e

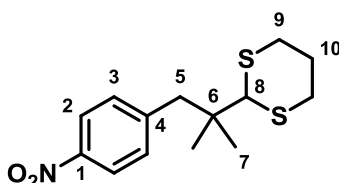

Off-white solid, 15%.

**mp** 73-77  $^{\circ}\text{C}$ .

**IR** (film)/ $\text{cm}^{-1}$   $\nu_{\text{max}}$  2963 (C-H stretch), 2931 (C-H stretch), 1517 (C-S stretch), 1345 (N-O stretch).

$^1\text{H NMR}$  ( $\text{CDCl}_3$ , 400 MHz)  $\delta_{\text{H}}$  8.17 – 8.12 (m, 2H,  $\text{H}^2$ ), 7.46 – 7.42 (m, 2H,  $\text{H}^3$ ), 3.84 (s, 1H,  $\text{H}^8$ ), 2.95 – 2.81 (m, 6H,  $\text{H}^{5-9}$ ), 2.10 (dt,  $J = 13.7, 4.0, 2.7$  Hz, 1H,  $\text{H}^{10a}$ ), 1.83 (dt,  $J = 14.0, 11.9, 3.8$  Hz, 1H,  $\text{H}^{10b}$ ), 1.10 (s, 6H,  $\text{H}^7$ ).

$^{13}\text{C NMR}$  ( $\text{CDCl}_3$ , 100 MHz)  $\delta_{\text{C}}$  146.9 ( $\text{C}^1$ ), 146.4 ( $\text{C}^4$ ), 131.5 ( $\text{C}^3$ ), 123.2 ( $\text{C}^2$ ), 60.0 ( $\text{C}^8$ ), 45.5 ( $\text{C}^5$ ), 39.9 ( $\text{C}^9$ ), 31.4 ( $\text{C}^6$ ), 26.1 ( $\text{C}^{10}$ ), 25.6 ( $\text{C}^7$ ).

**HRMS** (APCI $^+$ ) exact mass calculated for  $[\text{M}+\text{H}]^+$  ( $\text{C}_{14}\text{H}_{20}\text{O}_2\text{N}^{32}\text{S}_2$ ) requires  $m/z$  298.0930, found  $m/z$  298.0934.

### 1.2.6. Compound 1f

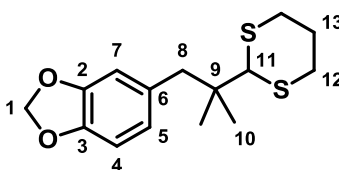

Oil, 21%.

**IR** (film)/ $\text{cm}^{-1}$   $\nu_{\text{max}}$  2961 (C-H stretch), 2895 (C-H stretch), 1501 (C-S stretch), 1488 (C=C stretch).

$^1\text{H NMR}$  ( $\text{CDCl}_3$ , 400 MHz)  $\delta_{\text{H}}$  6.80 – 6.77 (m, 1H,  $\text{H}^7$ ), 6.76 – 6.68 (m, 2H,  $\text{H}^{4,5}$ ), 5.93 (s, 2H,  $\text{H}^1$ ), 3.91 (s, 1H,  $\text{H}^{11}$ ), 2.93 – 2.81 (m, 4H,  $\text{H}^{12}$ ), 2.72 (s, 2H,  $\text{H}^8$ ), 2.14 – 2.02 (m, 1H,  $\text{H}^{13a}$ ), 1.82 (dt,  $J = 14.0, 10.9, 4.8$  Hz, 1H,  $\text{H}^{13b}$ ), 1.07 (s, 6H,  $\text{H}^{10}$ ).

$^{13}\text{C NMR}$  ( $\text{CDCl}_3$ , 100 MHz)  $\delta_{\text{C}}$  147.3 ( $\text{C}^2$ ), 146.1 ( $\text{C}^3$ ), 132.0 ( $\text{C}^6$ ), 123.7 ( $\text{C}^5$ ), 111.1 ( $\text{C}^7$ ), 107.8 ( $\text{C}^4$ ), 100.9 ( $\text{C}^1$ ), 60.2 ( $\text{C}^{11}$ ), 45.4 ( $\text{C}^8$ ), 39.6 ( $\text{C}^9$ ), 31.4 ( $\text{C}^{12}$ ), 26.2 ( $\text{C}^{13}$ ), 25.5 ( $\text{C}^{10}$ ).

### 1.2.7. Compound 1g

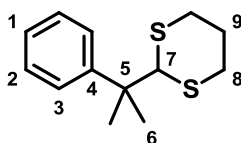

Oil, 52%.

**IR** (film)/ $\text{cm}^{-1}$   $\nu_{\text{max}}$  2971 (C-H stretch), 2893 (C-H stretch), 1496 (C-S stretch).

$^1\text{H NMR}$  ( $\text{CDCl}_3$ , 400 MHz)  $\delta_{\text{H}}$  7.46 – 7.38 (m, 2H,  $\text{H}^3$ ), 7.35 (ddd,  $J = 7.8, 6.8, 1.2$  Hz, 2H,  $\text{H}^2$ ), 7.30 – 7.21 (m, 1H,  $\text{H}^1$ ), 4.38 (s, 1H,  $\text{H}^7$ ), 2.91 – 2.77 (m, 4H,  $\text{H}^8$ ), 2.08 – 1.97 (m, 1H,  $\text{H}^{9a}$ ), 1.87 – 1.63 (m, 1H,  $\text{H}^{9b}$ ), 1.55 (s, 6H,  $\text{H}^6$ ).

$^{13}\text{C NMR}$  ( $\text{CDCl}_3$ , 100 MHz)  $\delta_{\text{C}}$  146.7 ( $\text{C}^4$ ), 128.2 ( $\text{C}^2$ ), 126.7 ( $\text{C}^3$ ), 126.3 ( $\text{C}^1$ ), 61.9 ( $\text{C}^7$ ), 42.8 ( $\text{C}^5$ ), 31.6 ( $\text{C}^8$ ), 26.4 ( $\text{C}^9$ ), 26.0 ( $\text{C}^6$ ).

**HRMS** (ES $^+$ ) exact mass calculated for  $[\text{M}+\text{H}]^+$  ( $\text{C}_{13}\text{H}_{19}^{32}\text{S}_2$ ) requires  $m/z$  239.0923, found  $m/z$  239.0925.

### 1.2.8. Compound 1h

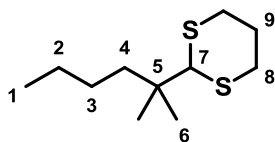

Oil, 27%.

IR (film)/cm<sup>-1</sup>  $\nu_{\max}$  2966 (C-H stretch), 1422.

<sup>1</sup>H NMR (CDCl<sub>3</sub>, 400 MHz)  $\delta_{\text{H}}$  4.02 (s, 1H, H<sup>7</sup>), 2.94 – 2.81 (m, 4H, H<sup>8</sup>), 2.11 – 2.00 (m, 1H, H<sup>9a</sup>), 1.89 – 1.73 (m, 1H, H<sup>9b</sup>), 1.48 – 1.40 (m, 2H, H<sup>4</sup>), 1.36 – 1.20 (m, 4H, H<sup>2,3</sup>), 1.07 (s, 6H, H<sup>6</sup>), 0.91 (t,  $J = 6.9$  Hz, 3H, H<sup>1</sup>).

<sup>13</sup>C NMR (CDCl<sub>3</sub>, 100 MHz)  $\delta_{\text{C}}$  61.2 (C<sup>7</sup>), 40.3 (C<sup>4</sup>), 38.3 (C<sup>5</sup>), 31.6 (C<sup>8</sup>), 26.4 (C<sup>9</sup>), 26.1 (C<sup>3</sup>), 25.6 (C<sup>6</sup>), 23.5 (C<sup>2</sup>), 14.3 (C<sup>1</sup>).

HRMS (ES<sup>+</sup>) exact mass calculated for [M+Na]<sup>+</sup> (C<sub>19</sub>H<sub>30</sub>ON<sup>32</sup>S<sub>2</sub>) requires  $m/z$  352.1763, found  $m/z$  352.1757.

### 1.2.9. Compound 1i

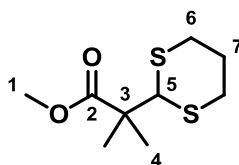

Oil, 95% (from aldehyde).

IR (film)/cm<sup>-1</sup>  $\nu_{\max}$  2981 (C-H stretch), 2948 (C-H stretch), 1731 (C=O stretch), 1464 (C-S stretch).

<sup>1</sup>H NMR (CDCl<sub>3</sub>, 400 MHz)  $\delta_{\text{H}}$  4.44 (s, 1H, H<sup>5</sup>), 3.71 (s, 3H, H<sup>1</sup>), 2.98 – 2.82 (m, 4H, H<sup>6</sup>), 2.09 (dtt,  $J = 14.0, 4.2, 2.7$  Hz, 1H, H<sup>7a</sup>), 1.83 (dtt,  $J = 14.0, 11.7, 3.8$  Hz, 1H, H<sup>7b</sup>), 1.34 (s, 6H, H<sup>4</sup>)

<sup>13</sup>C NMR (CDCl<sub>3</sub>, 100 MHz)  $\delta_{\text{C}}$  175.9 (C<sup>2</sup>), 57.7 (C<sup>5</sup>), 52.4 (C<sup>1</sup>), 47.9 (C<sup>3</sup>), 31.4 (C<sup>6</sup>), 26.1 (C<sup>7</sup>), 22.8 (C<sup>4</sup>).

HRMS (ES<sup>+</sup>) exact mass calculated for [M+Na]<sup>+</sup> (C<sub>9</sub>H<sub>16</sub>O<sub>2</sub><sup>23</sup>Na<sup>32</sup>S<sub>2</sub>) requires  $m/z$  243.0484, found  $m/z$  243.0484.

### 1.2.10. Compound 1j

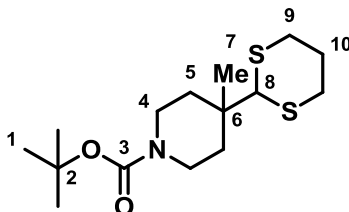

White solid, 47%.

mp 59-61 °C.

IR (film)/cm<sup>-1</sup>  $\nu_{\max}$  2966 (C-H stretch), 1688 (C=O stretch), 1453 (C-S stretch).

<sup>1</sup>H NMR (CDCl<sub>3</sub>, 400 MHz)  $\delta_{\text{H}}$  4.10 (s, 1H, H<sup>8</sup>), 3.66 – 3.56 (m, 2H, H<sup>4a</sup>), 3.17 (ddd,  $J = 13.5, 9.5, 3.6$  Hz, 2H, H<sup>4b</sup>), 2.92 – 2.83 (m, 4H, H<sup>9</sup>), 2.13 – 2.05 (m, 1H, H<sup>10a</sup>), 1.88 – 1.76 (m, 1H, H<sup>10b</sup>), 1.71 (ddd,  $J = 13.8, 9.5, 4.3$  Hz, 2H, H<sup>5a</sup>), 1.55 – 1.48 (m, 2H, H<sup>5b</sup>), 1.45 (s, 9H, H<sup>1</sup>), 1.14 (s, 3H, H<sup>7</sup>)

<sup>13</sup>C NMR (CDCl<sub>3</sub>, 100 MHz)  $\delta_{\text{C}}$  155.1 (C<sup>3</sup>), 79.5 (C<sup>2</sup>), 60.4 (C<sup>8</sup>), 39.7 (C<sup>4</sup>), 36.8 (C<sup>6</sup>), 35.4 (C<sup>5</sup>), 31.4 (C<sup>9</sup>), 28.6 (C<sup>7</sup>), 26.4 (C<sup>10</sup>), 20.7 (C<sup>1</sup>).

## 1.3. General Procedure C: Synthesis of Amidated Dithianes 3.

A 14 mL oven dried vial is charged with dithiane (0.05 mmol, 1 equivalent), [Cp\*Rh(MeCN)<sub>3</sub>][(SbF<sub>6</sub>)<sub>2</sub>] (0.15 equivalents), Fmoc-Pro-OH (0.31 equivalents), NaOtBu (0.30 equivalents) and dioxazolone (2 equivalents). The vial is sealed, dichloroethane (0.5 mL, 0.1 M) was added, the atmosphere replaced with nitrogen and heated to 80 °C. The reaction was left to stir for 36 hours, and the crude reaction mixture was loaded directly and purified by flash column chromatography to give amidodithianes.

### 1.3.1. Compound 3a

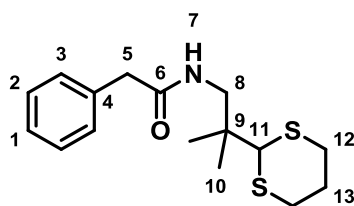

Off-white solid, 71%.

mp 111-113 °C.

IR (film)/cm<sup>-1</sup>  $\nu_{\max}$  3305 (N-H stretch), 2929 (C-H stretch), 1647 (C=O stretch), 1527.

<sup>1</sup>H NMR (CDCl<sub>3</sub>, 400 MHz)  $\delta_{\text{H}}$  7.41 – 7.35 (m, 2H, H<sup>2</sup>), 7.33 – 7.28 (m, 3H, H<sup>1,3</sup>), 5.80 (br s, 1H, H<sup>7</sup>), 3.65 (s, 1H, H<sup>11</sup>), 3.62 (s, 2H, H<sup>5</sup>), 3.26 (d,  $J = 6.6$  Hz, 2H, H<sup>8</sup>), 2.76 (dt,  $J = 14.5, 3.7$  Hz, 2H, H<sup>12a</sup>), 2.64 (ddd,  $J = 14.5, 12.5, 2.5$  Hz, 2H, H<sup>12b</sup>), 2.01 (dt,  $J = 13.6, 4.2, 2.5$  Hz, 1H, H<sup>13a</sup>), 1.70 (dt,  $J = 13.9, 12.4, 3.3$  Hz, 1H, H<sup>13b</sup>), 1.00 (s, 6H, H<sup>10</sup>).

<sup>13</sup>C NMR (CDCl<sub>3</sub>, 100 MHz)  $\delta_{\text{C}}$  171.3 (C<sup>6</sup>), 135.4 (C<sup>4</sup>), 129.8 (C<sup>3</sup>), 129.2 (C<sup>2</sup>), 127.4 (C<sup>1</sup>), 58.7 (C<sup>11</sup>), 47.5 (C<sup>8</sup>), 44.3 (C<sup>5</sup>), 40.1 (C<sup>9</sup>), 31.4 (C<sup>12</sup>), 26.0 (C<sup>13</sup>), 23.9 (C<sup>10</sup>).

HRMS (ES<sup>+</sup>) exact mass calculated for [M+Na]<sup>+</sup> (C<sub>16</sub>H<sub>23</sub>ON<sup>23</sup>Na<sup>32</sup>S<sub>2</sub>) requires  $m/z$  332.1113, found  $m/z$  332.1109.

### 1.3.2. Compound 3b

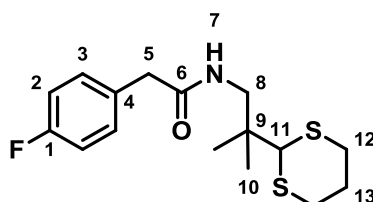

Off-white solid, 74%.

mp 104-105 °C.

IR (film)/cm<sup>-1</sup>  $\nu_{\max}$  3307 (N-H stretch), 2971 (C-H stretch), 1648 (C=O stretch), 1508 (C=C stretch).

<sup>1</sup>H NMR (CDCl<sub>3</sub>, 500 MHz)  $\delta_{\text{H}}$  7.30 – 7.25 (m, 2H, H<sup>2</sup>), 7.09 – 7.04 (m, 2H, H<sup>3</sup>), 5.84 (s, 1H, H<sup>7</sup>), 3.74 (s, 1H, H<sup>11</sup>), 3.58 (s, 2H, H<sup>5</sup>), 3.27 (d,  $J = 6.6$  Hz, 2H, H<sup>8</sup>), 2.85 – 2.77 (m, 2H, H<sup>12a</sup>), 2.70 (ddd,  $J = 14.6, 12.4, 2.4$  Hz, 2H, H<sup>12b</sup>), 2.05 (dt,  $J = 13.6, 4.1, 2.5$  Hz, 1H, H<sup>13a</sup>), 1.72 (dt,  $J = 14.1, 12.5, 3.3$  Hz, 1H, H<sup>13b</sup>), 1.02 (s, 6H, H<sup>10</sup>).

<sup>13</sup>C NMR (CDCl<sub>3</sub>, 125 MHz)  $\delta_{\text{C}}$  170.90 (C<sup>6</sup>), 162.27 (d,  $J = 246.0$  Hz, C<sup>1</sup>), 131.38 (d,  $J = 7.9$  Hz, C<sup>3</sup>), 131.11 (d,  $J = 3.3$  Hz, C<sup>4</sup>), 116.01 (d,  $J = 21.4$  Hz, C<sup>2</sup>), 58.9 (C<sup>11</sup>), 47.5 (C<sup>8</sup>), 43.4 (C<sup>5</sup>), 40.1 (C<sup>9</sup>), 31.5 (C<sup>12</sup>), 26.0 (C<sup>13</sup>), 24.2 (C<sup>10</sup>).

<sup>19</sup>F NMR (CDCl<sub>3</sub>, 400 MHz)  $\delta_{\text{F}}$  -115.3.

HRMS (ES<sup>+</sup>) exact mass calculated for [M+H]<sup>+</sup> (C<sub>16</sub>H<sub>23</sub>ONF<sup>32</sup>S<sub>2</sub>) requires  $m/z$  328.1200, found  $m/z$  328.1201.

### 1.3.3. Compound 3c

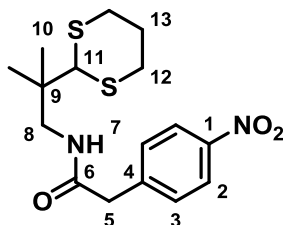

Yellow solid, 40%.

mp 96-101 °C.

IR (film)/cm<sup>-1</sup>  $\nu_{\max}$  3291 (N-H stretch), 3081 (C-H stretch), 1650 (C=O stretch), 1519 (N-O stretch).

<sup>1</sup>H NMR (CDCl<sub>3</sub>, 500 MHz)  $\delta_{\text{H}}$  8.23 – 8.20 (m, 2H, H<sup>2</sup>), 7.52 – 7.48 (m, 2H, H<sup>3</sup>), 6.01 (s, 1H, H<sup>7</sup>), 3.88 (s, 1H, H<sup>11</sup>), 3.68 (s, 2H, H<sup>5</sup>), 3.31 (d,  $J = 6.5$  Hz, 2H, H<sup>8</sup>), 2.88 – 2.71 (m, 4H, H<sup>12</sup>), 2.10 – 2.04 (m, 1H, H<sup>13a</sup>), 1.72 (dt,  $J = 14.1, 12.2, 3.7$  Hz, 1H, H<sup>13b</sup>), 1.05 (s, 6H, H<sup>10</sup>).

<sup>13</sup>C NMR (CDCl<sub>3</sub>, 125 MHz)  $\delta_{\text{C}}$  169.3 (C<sup>6</sup>), 147.4 (C<sup>1</sup>), 142.7 (C<sup>4</sup>), 130.6 (C<sup>3</sup>), 124.1 (C<sup>2</sup>), 59.1 (C<sup>11</sup>), 47.7 (C<sup>8</sup>), 43.8 (C<sup>5</sup>), 40.1 (C<sup>9</sup>), 31.6 (C<sup>12</sup>), 26.0 (C<sup>13</sup>), 24.5 (C<sup>10</sup>).

HRMS (ES<sup>+</sup>) exact mass calculated for [M+Na]<sup>+</sup> (C<sub>16</sub>H<sub>22</sub>O<sub>3</sub>N<sub>2</sub><sup>23</sup>Na<sup>32</sup>S<sub>2</sub>) requires  $m/z$  377.0964, found  $m/z$  377.0964.

### 1.3.4. Compound 3d

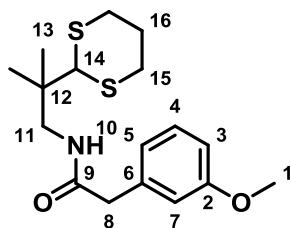

Off-white solid, 67%.

**mp** 96-99 °C.

**IR** (film)/cm<sup>-1</sup>  $\nu_{\max}$  3304 (N-H stretch), 2980 (C-H stretch), 1649 (N-H stretch), 1532 (C=C stretch).

**<sup>1</sup>H NMR** (CDCl<sub>3</sub>, 500 MHz)  $\delta_{\text{H}}$  7.30 (td,  $J = 7.5, 1.0$  Hz, 1H, H<sup>4</sup>), 6.90 – 6.82 (m, 3H, H<sup>3,5,7</sup>), 5.84 (s, 1H, H<sup>10</sup>), 3.81 (s, 3H, H<sup>1</sup>), 3.66 (s, 1H, H<sup>14</sup>), 3.59 (s, 2H, H<sup>8</sup>), 3.26 (d,  $J = 6.6$  Hz, 2H, H<sup>11</sup>), 2.77 (dt,  $J = 14.2, 3.7$  Hz, 2H, H<sup>15a</sup>), 2.66 (ddd,  $J = 14.4, 12.4, 2.5$  Hz, 2H, H<sup>15b</sup>), 2.02 (dt,  $J = 13.6, 4.2, 2.5$  Hz, 1H, H<sup>16a</sup>), 1.71 (dt,  $J = 14.2, 12.5, 3.4$  Hz, 1H, H<sup>16b</sup>), 1.01 (s, 6H, H<sup>13</sup>).

**<sup>13</sup>C NMR** (CDCl<sub>3</sub>, 100 MHz)  $\delta_{\text{C}}$  171.0 (C<sup>9</sup>), 160.3 (C<sup>2</sup>), 136.9 (C<sup>6</sup>), 130.3 (C<sup>4</sup>), 122.1 (C<sup>3</sup>), 115.1 (C<sup>7</sup>), 113.2 (C<sup>5</sup>), 58.7 (C<sup>14</sup>), 55.4 (C<sup>1</sup>), 47.4 (C<sup>11</sup>), 44.4 (C<sup>8</sup>), 40.2 (C<sup>12</sup>), 31.4 (C<sup>15</sup>), 26.1 (C<sup>16</sup>), 24.0 (C<sup>13</sup>).

**HRMS** (ES<sup>+</sup>) exact mass calculated for [M+Na]<sup>+</sup> (C<sub>17</sub>H<sub>25</sub>O<sub>2</sub>N<sup>23</sup>Na<sup>32</sup>S<sub>2</sub>) requires  $m/z$  362.1219, found  $m/z$  362.1213.

### 1.3.5. Compound 3e

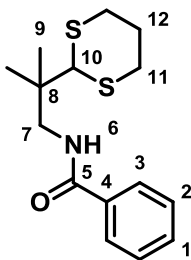

White solid, 49%.

**mp** 89-92 °C.

**IR** (film)/cm<sup>-1</sup>  $\nu_{\max}$  3328 (N-H stretch), 2971 (C-H stretch), 1643 (C=O stretch), 1537 (C=C stretch).

**<sup>1</sup>H NMR** (CDCl<sub>3</sub>, 400 MHz) 7.86 – 7.81 (m, 1H, H<sup>3</sup>), 7.53 – 7.48 (m, 1H, H<sup>1</sup>), 7.48 – 7.42 (m, 2H, H<sup>2</sup>), 6.75 (s, 1H, H<sup>6</sup>), 4.12 (s, 1H, H<sup>10</sup>), 3.56 (d,  $J = 6.6$  Hz, 2H, H<sup>7</sup>), 3.05 – 2.86 (m, 4H, H<sup>11</sup>), 2.17 – 2.09 (m, 1H, H<sup>12a</sup>), 1.94 – 1.80 (m, 1H, H<sup>12b</sup>), 1.18 (s, 6H, H<sup>9</sup>).

**<sup>13</sup>C NMR** (CDCl<sub>3</sub>, 100 MHz)  $\delta_{\text{C}}$  167.6 (C<sup>5</sup>), 134.9 (C<sup>4</sup>), 131.5 (C<sup>1</sup>), 128.7 (C<sup>3</sup>), 127.1 (C<sup>2</sup>), 59.5 (C<sup>10</sup>), 47.9 (C<sup>7</sup>), 40.4 (C<sup>8</sup>), 31.7 (C<sup>11</sup>), 26.2 (C<sup>12</sup>), 24.6 (C<sup>9</sup>).

**HRMS** (ES<sup>+</sup>) exact mass calculated for [M+Na]<sup>+</sup> (C<sub>15</sub>H<sub>21</sub>ON<sup>23</sup>Na<sup>32</sup>S<sub>2</sub>) requires  $m/z$  318.0957, found  $m/z$  318.0958.

### 1.3.6. Compound 3f

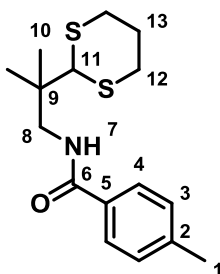

White solid, 41%.

**mp** 167-168 °C.

**IR** (film)/cm<sup>-1</sup>  $\nu_{\max}$  3348 (N-H stretch), 2980 (C-H stretch), 1642 (C=O stretch), 1503 (C=C stretch).

**<sup>1</sup>H NMR** (CDCl<sub>3</sub>, 500 MHz)  $\delta_{\text{H}}$  7.72 (d,  $J = 8.2$  Hz, 2H, H<sup>4</sup>), 7.25 (m, 2H, H<sup>3</sup>), 6.69 (s, 1H, H<sup>7</sup>), 4.11 (s, 1H, H<sup>11</sup>), 3.55 (d,  $J = 6.6$  Hz, 2H, H<sup>8</sup>), 2.97 – 2.85 (m, 4H, H<sup>12</sup>), 2.40 (s, 3H, H<sup>1</sup>), 2.13 (app dq,  $J = 14.0, 3.2$  Hz, 1H, H<sup>13a</sup>), 1.91 – 1.81 (m, 1H, H<sup>13b</sup>), 1.17 (s, 6H).

**<sup>13</sup>C NMR** (CDCl<sub>3</sub>, 125 MHz)  $\delta_{\text{C}}$  167.5 (C<sup>6</sup>), 141.9 (C<sup>2</sup>), 132.0 (C<sup>5</sup>), 129.4 (C<sup>3</sup>), 127.1 (C<sup>4</sup>), 59.5 (C<sup>11</sup>), 47.8 (C<sup>8</sup>), 40.4 (C<sup>9</sup>), 31.7 (C<sup>12</sup>), 26.2 (C<sup>13</sup>), 24.5 (C<sup>10</sup>), 21.6 (C<sup>1</sup>).



**HRMS** ( $\text{ES}^+$ ) exact mass calculated for  $[\text{M}+\text{Na}]^+$  ( $\text{C}_{16}\text{H}_{23}\text{ON}^{23}\text{Na}^{32}\text{S}_2$ ) requires  $m/z$  332.1113, found  $m/z$  332.1112.

### 1.3.7. Compound 3g

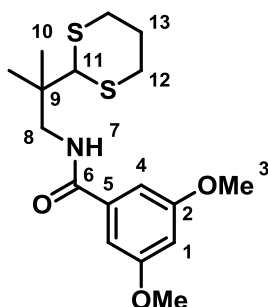

White solid, 55%.

**mp** 103-108 °C.

**IR** (film)/ $\text{cm}^{-1}$   $\nu_{\text{max}}$  3332 (N-H stretch), 2933 (C-H stretch), 1649 (C=O stretch), 1593 (C=C stretch).

**$^1\text{H}$  NMR** ( $\text{CDCl}_3$ , 400 MHz)  $\delta_{\text{H}}$  6.97 (d,  $J = 2.3$  Hz, 2H,  $\text{H}^4$ ), 6.67 (t,  $J = 6.9$  Hz, 1H,  $\text{H}^7$ ), 6.58 (t,  $J = 2.3$  Hz, 1H,  $\text{H}^1$ ), 4.11 (s, 1H,  $\text{H}^{11}$ ), 3.83 (s, 6H,  $\text{H}^3$ ), 3.53 (d,  $J = 6.6$  Hz, 2H,  $\text{H}^8$ ), 2.99 – 2.88 (m, 4H,  $\text{H}^{12}$ ), 2.16 – 2.08 (m, 1H,  $\text{H}^{13a}$ ), 1.93 – 1.77 (m, 1H,  $\text{H}^{13b}$ ), 1.17 (s, 6H,  $\text{H}^{10}$ ).

**$^{13}\text{C}$  NMR** ( $\text{CDCl}_3$ , 100 MHz)  $\delta_{\text{C}}$  167.3 ( $\text{C}^6$ ), 161.0 ( $\text{C}^2$ ), 137.2 ( $\text{C}^5$ ), 105.1 ( $\text{C}^4$ ), 103.6 ( $\text{C}^1$ ), 59.4 ( $\text{C}^{11}$ ), 55.7 ( $\text{C}^3$ ), 47.9 ( $\text{C}^8$ ), 40.4 ( $\text{C}^9$ ), 31.7 ( $\text{C}^{12}$ ), 26.2 ( $\text{C}^{13}$ ), 24.5 ( $\text{C}^{10}$ ).

**HRMS** ( $\text{ES}^+$ ) exact mass calculated for  $[\text{M}+\text{H}]^+$  ( $\text{C}_{17}\text{H}_{26}\text{O}_3\text{N}^{32}\text{S}_2$ ) requires  $m/z$  356.1349, found  $m/z$  356.1343.

### 1.3.8. Compound 3h

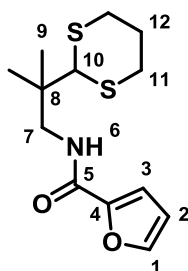

Pale yellow solid, 46%.

**mp** 137-139 °C.

**IR** (film)/ $\text{cm}^{-1}$   $\nu_{\text{max}}$  3267 (N-H stretch), 2827 (C-H stretch), 1653 (C=O stretch), 1524 (C=C stretch).

**$^1\text{H}$  NMR** ( $\text{CDCl}_3$ , 400 MHz)  $\delta_{\text{H}}$  7.48 – 7.44 (m, 1H,  $\text{H}^3$ ), 7.11 (d,  $J = 3.5$  Hz, 1H,  $\text{H}^1$ ), 6.77 (s, 1H,  $\text{H}^6$ ), 6.50 (dd,  $J = 3.5$ , 1.8 Hz, 1H,  $\text{H}^2$ ), 4.11 (s, 1H,  $\text{H}^{10}$ ), 3.51 (d,  $J = 6.8$  Hz, 2H,  $\text{H}^7$ ), 2.98 – 2.88 (m, 4H,  $\text{H}^{11}$ ), 2.12 (dp,  $J = 13.6$ , 3.3 Hz, 1H,  $\text{H}^{12a}$ ), 1.86 (dt,  $J = 15.6$ , 8.8, 6.9 Hz, 1H,  $\text{H}^{12b}$ ), 1.15 (s, 6H,  $\text{H}^9$ ).

**$^{13}\text{C}$  NMR** ( $\text{CDCl}_3$ , 100 MHz)  $\delta_{\text{C}}$  158.7 ( $\text{C}^5$ ), 148.3 ( $\text{C}^4$ ), 144.0 ( $\text{C}^3$ ), 114.4 ( $\text{C}^1$ ), 112.3 ( $\text{C}^2$ ), 59.0 ( $\text{C}^{10}$ ), 47.0 ( $\text{C}^7$ ), 40.4 ( $\text{C}^8$ ), 31.6 ( $\text{C}^{11}$ ), 26.2 ( $\text{C}^{12}$ ), 24.1 ( $\text{C}^9$ ).

**HRMS** ( $\text{ES}^+$ ) exact mass calculated for  $[\text{M}+\text{Na}]^+$  ( $\text{C}_{13}\text{H}_{19}\text{O}_2\text{N}^{23}\text{Na}^{32}\text{S}_2$ ) requires  $m/z$  308.0749, found  $m/z$  308.0748.

### 1.3.9. Compound 3i

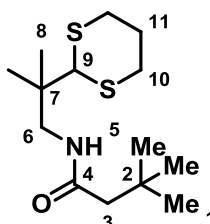

Off-white solid, 54%.

**mp** 136-139 °C.

**IR** (film)/ $\text{cm}^{-1}$   $\nu_{\text{max}}$  3309 (N-H stretch), 2962 (C-H stretch), 1645 (C=O stretch), 1556 (C=C stretch).

**$^1\text{H}$  NMR** ( $\text{CDCl}_3$ , 400 MHz)  $\delta_{\text{H}}$  5.81 (s, 1H,  $\text{H}^5$ ), 4.03 (s, 1H,  $\text{H}^9$ ), 3.33 (d,  $J = 6.7$  Hz, 2H,  $\text{H}^6$ ), 2.95 – 2.81 (m, 4H,  $\text{H}^{10}$ ), 2.15 – 2.03 (m, 3H,  $\text{H}^3$ ,  $\text{H}^{11a}$ ), 1.89 – 1.77 (m, 1H,  $\text{H}^{11b}$ ), 1.10 (s, 6H,  $\text{H}^8$ ), 1.06 (s, 9H,  $\text{H}^1$ ).

$^{13}\text{C}$  NMR ( $\text{CDCl}_3$ , 100 MHz)  $\delta_{\text{C}}$  171.9 ( $\text{C}^4$ ), 59.3 ( $\text{C}^9$ ), 51.2 ( $\text{C}^3$ ), 47.4 ( $\text{C}^6$ ), 40.0 ( $\text{C}^7$ ), 31.7 ( $\text{C}^{10}$ ), 31.0 ( $\text{C}^2$ ), 30.1 ( $\text{C}^1$ ), 26.2 ( $\text{C}^{11}$ ), 24.3 ( $\text{C}^8$ ).

HRMS ( $\text{ES}^+$ ) exact mass calculated for  $[\text{M}+\text{H}]^+$  ( $\text{C}_{14}\text{H}_{28}\text{ON}^3\text{S}_2$ ) requires  $m/z$  290.1607, found  $m/z$  290.1607.

### 1.3.10. Compound 3j

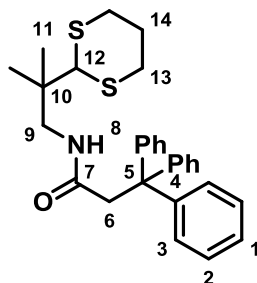

Off-white solid, 61%.

IR (film)/ $\text{cm}^{-1}$   $\nu_{\text{max}}$  3337 (N-H stretch), 2964 (C-H stretch), 1653 (C=O stretch), 1522 (C=C stretch).

$^1\text{H}$  NMR ( $\text{CDCl}_3$ , 400 MHz)  $\delta_{\text{H}}$  7.33 – 7.20 (m, 15H,  $\text{H}^{1,2,3,4}$ ), 5.27 (t,  $J = 5.9$  Hz, 1H,  $\text{H}^8$ ), 3.65 (s, 2H,  $\text{H}^6$ ), 3.59 (s, 1H,  $\text{H}^{12}$ ), 3.04 (d,  $J = 6.4$  Hz, 2H,  $\text{H}^9$ ), 2.86 – 2.68 (m, 4H,  $\text{H}^{13}$ ), 2.08 – 2.00 (m, 1H,  $\text{H}^{14a}$ ), 1.75 (dtt,  $J = 13.9, 12.0, 3.6$  Hz, 1H,  $\text{H}^{14b}$ ), 0.83 (s, 6H,  $\text{H}^{11}$ ).

$^{13}\text{C}$  NMR ( $\text{CDCl}_3$ , 100 MHz)  $\delta_{\text{C}}$  170.8 ( $\text{C}^7$ ), 146.5 ( $\text{C}^4$ ), 129.4 ( $\text{C}^3$ ), 128.3 ( $\text{C}^2$ ), 126.7 ( $\text{C}^1$ ), 58.1 ( $\text{C}^{12}$ ), 56.1 ( $\text{C}^5$ ), 49.1 ( $\text{C}^6$ ), 47.7 ( $\text{C}^9$ ), 39.6 ( $\text{C}^{10}$ ), 31.2 ( $\text{C}^{13}$ ), 26.1 ( $\text{C}^{14}$ ), 23.6 ( $\text{C}^{11}$ ).

HRMS ( $\text{ES}^+$ ) exact mass calculated for  $[\text{M}+\text{H}]^+$  ( $\text{C}_{29}\text{H}_{34}\text{ON}^3\text{S}_2$ ) requires  $m/z$  476.2087, found  $m/z$  476.2075.

### 1.3.11. Compound 3k

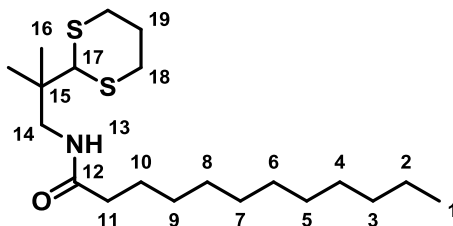

Off-white solid, 62%.

mp 64-66 °C.

IR (film)/ $\text{cm}^{-1}$   $\nu_{\text{max}}$  3279 (N-H stretch), 2924 (C-H stretch), 1649 (C=O stretch), 1559 (C=C stretch).

$^1\text{H}$  NMR ( $\text{CDCl}_3$ , 400 MHz)  $\delta_{\text{H}}$  5.89 (s, 1H,  $\text{H}^{13}$ ), 4.03 (s, 1H,  $\text{H}^{17}$ ), 3.34 (d,  $J = 6.6$  Hz, 2H,  $\text{H}^{14}$ ), 3.00 – 2.84 (m, 4H,  $\text{H}^{18}$ ), 2.23 – 2.18 (m, 2H,  $\text{H}^{11}$ ), 2.15 – 2.07 (m, 1H,  $\text{H}^{19a}$ ), 1.91 – 1.77 (m, 1H,  $\text{H}^{19b}$ ), 1.64 (p,  $J = 7.4$  Hz, 2H,  $\text{H}^{10}$ ), 1.36 – 1.22 (m, 16H,  $\text{H}^{2,3,4,5,6,7,8,9}$ ), 1.10 (s, 6H,  $\text{H}^{16}$ ), 0.91 – 0.85 (m, 3H,  $\text{H}^1$ ).

$^{13}\text{C}$  NMR ( $\text{CDCl}_3$ , 100 MHz)  $\delta_{\text{C}}$  173.3 ( $\text{C}^{12}$ ), 59.3 ( $\text{C}^{17}$ ), 47.3 ( $\text{C}^{14}$ ), 40.1 ( $\text{C}^{15}$ ), 37.3 ( $\text{C}^{11}$ ), 32.1 ( $\text{C}^3$ ), 31.7 ( $\text{C}^{18}$ ), 29.8 ( $\text{C}^{4/5/6/7/8/9}$ ), 29.8 ( $\text{C}^{4/5/6/7/8/9}$ ), 29.8 ( $\text{C}^{4/5/6/7/8/9}$ ), 29.7 ( $\text{C}^{4/5/6/7/8/9}$ ), 29.5 ( $\text{C}^{4/5/6/7/8/9}$ ), 29.5 ( $\text{C}^{4/5/6/7/8/9}$ ), 26.2 ( $\text{C}^{19}$ ), 26.0 ( $\text{C}^{10}$ ), 24.3 ( $\text{C}^{16}$ ), 22.8 ( $\text{C}^{4/5/6/7/8/9}$ ), 14.3 ( $\text{C}^1$ ).

HRMS ( $\text{ES}^+$ ) exact mass calculated for  $[\text{M}+\text{H}]^+$  ( $\text{C}_{20}\text{H}_{40}\text{ON}^3\text{S}_2$ ) requires  $m/z$  374.2546, found  $m/z$  374.2540.

### 1.3.12. Compound 3l

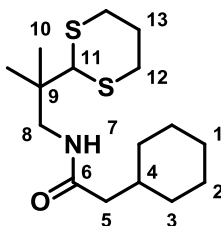

Off-white solid, 69%.

mp 98-99 °C.

IR (film)/ $\text{cm}^{-1}$   $\nu_{\text{max}}$  3304 (N-H stretch), 2922 (C-H stretch), 1642 (C=O stretch), 1546 (C=C stretch).

$^1\text{H NMR}$  ( $\text{CDCl}_3$ , 400 MHz)  $\delta_{\text{H}}$  5.88 (s, 1H,  $\text{H}^7$ ), 4.02 (s, 1H,  $\text{H}^{11}$ ), 3.33 (d,  $J = 6.7$  Hz, 2H,  $\text{H}^8$ ), 2.94 – 2.83 (m, 4H,  $\text{H}^{12}$ ), 2.15 – 2.04 (m, 3H,  $\text{H}^{5, 13\text{a}}$ ), 1.89 – 1.60 (m, 8H, H,  $\text{H}^{1\text{a}, 2\text{a}, 3\text{a}, 4, 13\text{b}}$ ), 1.28 (qt,  $J = 13.3, 3.4$  Hz, 2H,  $\text{H}^{3\text{b}}$ ), 1.20 – 1.10 (m, 1H,  $\text{H}^{1\text{b}}$ ), 1.09 (s, 6H,  $\text{H}^{10}$ ), 1.02 – 0.90 (m, 2H,  $\text{H}^{2\text{b}}$ )

$^{13}\text{C NMR}$  ( $\text{CDCl}_3$ , 100 MHz)  $\delta_{\text{C}}$  172.6 ( $\text{C}^6$ ), 59.3 ( $\text{C}^{11}$ ), 47.3 ( $\text{C}^8$ ), 45.4 ( $\text{C}^5$ ), 40.0 ( $\text{C}^9$ ), 35.4 ( $\text{C}^4$ ), 33.3 ( $\text{C}^2$ ), 31.7 ( $\text{C}^{12}$ ), 26.4 ( $\text{C}^1$ ), 26.2 ( $\text{C}^3$ ), 26.2 ( $\text{C}^{13}$ ), 24.3 ( $\text{C}^{10}$ ).

**HRMS** ( $\text{ES}^+$ ) exact mass calculated for  $[\text{M}+\text{Na}]^+$  ( $\text{C}_{16}\text{H}_{29}\text{ON}^{23}\text{Na}^{32}\text{S}_2$ ) requires  $m/z$  338.1583, found  $m/z$  338.1578.

### 1.3.13. Compound 3m

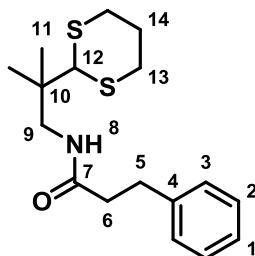

Off-white solid, 58%.

**mp** 96-97  $^{\circ}\text{C}$ .

**IR** (film)/ $\text{cm}^{-1}$   $\nu_{\text{max}}$  3308 (N-H stretch), 2929 (C-H stretch), 1647 (C=O stretch), 1545 (C=C stretch).

$^1\text{H NMR}$  ( $\text{CDCl}_3$ , 400 MHz)  $\delta_{\text{H}}$  7.33 – 7.18 (m, 5H,  $\text{H}^{1,2,3}$ ), 5.79 (br s, 1H,  $\text{H}^8$ ), 3.82 (s, 1H,  $\text{H}^{12}$ ), 3.29 (d,  $J = 6.7$  Hz, 2H,  $\text{H}^9$ ), 2.99 (t,  $J = 7.6$  Hz, 2H,  $\text{H}^6$ ), 2.89 – 2.77 (m, 4H,  $\text{H}^{13}$ ), 2.53 (t,  $J = 7.6$  Hz, 2H,  $\text{H}^5$ ), 2.12 – 2.04 (m, 1H,  $\text{H}^{14\text{a}}$ ), 1.85 – 1.73 (m, 1H,  $\text{H}^{14\text{b}}$ ), 1.02 (s, 6H,  $\text{H}^{11}$ ).

$^{13}\text{C NMR}$  ( $\text{CDCl}_3$ , 100 MHz)  $\delta_{\text{C}}$  172.2 ( $\text{C}^7$ ), 141.0 ( $\text{C}^4$ ), 128.7 ( $\text{C}^2$ ), 128.5 ( $\text{C}^3$ ), 126.4 ( $\text{C}^1$ ), 58.8 ( $\text{C}^{12}$ ), 47.4 ( $\text{C}^9$ ), 40.0 ( $\text{C}^{10}$ ), 38.8 ( $\text{C}^5$ ), 31.8 ( $\text{C}^6$ ), 31.5 ( $\text{C}^{13}$ ), 26.1 ( $\text{C}^{14}$ ), 24.1 ( $\text{C}^{11}$ ).

**HRMS** ( $\text{ES}^+$ ) exact mass calculated for  $[\text{M}+\text{Na}]^+$  ( $\text{C}_{17}\text{H}_{25}\text{ON}^{23}\text{Na}^{32}\text{S}_2$ ) requires  $m/z$  346.1270, found  $m/z$  346.1267.

### 1.3.14. Compound 3n

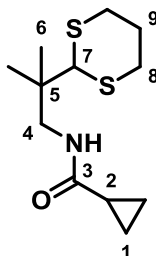

Clear oil, 45%.

**IR** (film)/ $\text{cm}^{-1}$   $\nu_{\text{max}}$  3365 (N-H stretch), 2927 (C-H stretch), 1629 (C=O stretch), 1459 (C-S stretch).

$^1\text{H NMR}$  ( $\text{MeOH-d}_4$ , 500 MHz)  $\delta_{\text{H}}$  4.24 (s, 1H,  $\text{H}^7$ ), 3.01 (ddd,  $J = 14.8, 12.5, 2.5$  Hz, 2H,  $\text{H}^{8\text{a}}$ ), 2.89 (ddd,  $J = 14.6, 4.2, 3.2$  Hz, 2H,  $\text{H}^{8\text{b}}$ ), 2.11 (dtd,  $J = 13.6, 4.3, 2.1$  Hz, 1H,  $\text{H}^{9\text{a}}$ ), 1.78 (dtt,  $J = 13.9, 12.5, 3.2$  Hz, 1H,  $\text{H}^{9\text{b}}$ ), 1.70 (tt,  $J = 7.9, 4.6$  Hz, 1H,  $\text{H}^2$ ), 1.07 (s, 6H,  $\text{H}^6$ ), 0.89 – 0.84 (m, 2H,  $\text{H}^{1\text{a}}$ ), 0.80 – 0.75 (m, 2H,  $\text{H}^{1\text{b}}$ ).

$^{13}\text{C NMR}$  ( $\text{MeOH-d}_4$ , 500 MHz)  $\delta_{\text{C}}$  177.8 ( $\text{C}^3$ ), 60.6 ( $\text{C}^7$ ), 41.8 ( $\text{C}^5$ ), 33.0 ( $\text{C}^8$ ), 28.2 ( $\text{C}^9$ ), 24.6 ( $\text{C}^6$ ), 15.6 ( $\text{C}^2$ ), 8.1 ( $\text{C}^1$ ).

**HRMS** ( $\text{ES}^+$ ) exact mass calculated for  $[\text{M}+\text{Na}]^+$  ( $\text{C}_{12}\text{H}_{21}\text{ON}^{23}\text{Na}^{32}\text{S}_2$ ) requires  $m/z$  282.0957, found  $m/z$  282.0957.

### 1.3.15. Compound 3o

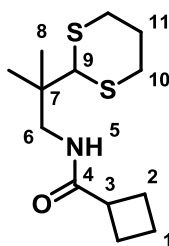

Pale brown solid, 52%.

**mp** 89-93  $^{\circ}\text{C}$ .

**IR** (film)/ $\text{cm}^{-1}$   $\nu_{\text{max}}$  3303 (N-H stretch), 2971 (C-H stretch), 1646 (C=O stretch), 1543 (C-S stretch).

$^1\text{H NMR}$  ( $\text{CDCl}_3$ , 400 MHz)  $\delta_{\text{H}}$  5.82 (s, 1H,  $\text{H}^5$ ), 4.02 (s, 1H,  $\text{H}^9$ ), 3.33 (d,  $J = 6.7$  Hz, 2H,  $\text{H}^6$ ), 3.03 (pd,  $J = 8.6, 1.0$  Hz, 1H,  $\text{H}^3$ ), 2.94 – 2.83 (m, 4H,  $\text{H}^{10}$ ), 2.34 – 2.24 (m, 2H,  $\text{H}^{2a}$ ), 2.22 – 2.07 (m, 3H,  $\text{H}^{2b, 11a}$ ), 2.02 – 1.76 (m, 3H,  $\text{H}^{1, 11b}$ ), 1.09 (s, 6H,  $\text{H}^8$ ).

$^{13}\text{C NMR}$  ( $\text{CDCl}_3$ , 400 MHz)  $\delta_{\text{C}}$  175.2 ( $\text{C}^4$ ), 59.4 ( $\text{C}^9$ ), 47.2 ( $\text{C}^6$ ), 40.4 ( $\text{C}^3$ ), 40.2 ( $\text{C}^7$ ), 31.7 ( $\text{C}^{10}$ ), 26.2 ( $\text{C}^{11}$ ), 25.6 ( $\text{C}^2$ ), 24.3 ( $\text{C}^8$ ), 18.4 ( $\text{C}^1$ ).

**HRMS** ( $\text{ES}^+$ ) exact mass calculated for  $[\text{M}+\text{Na}]^+$  ( $\text{C}_{13}\text{H}_{23}\text{ON}^{23}\text{Na}^{32}\text{S}_2$ ) requires  $m/z$  296.1113, found  $m/z$  296.1113.

### 1.3.16. Compound 3p

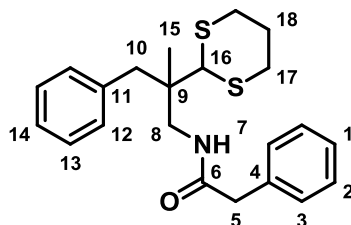

Off-white solid, 47%.

**mp** 146-148 °C.

**IR** (film)/ $\text{cm}^{-1}$   $\nu_{\text{max}}$  3313 (N-H stretch), 2927 (C-H stretch), 1647 (C=O stretch), 1529 (C-S stretch), 1495 (C=C stretch).

$^1\text{H NMR}$  ( $\text{CDCl}_3$ , 400 MHz)  $\delta_{\text{H}}$  7.39 – 7.34 (m, 2H,  $\text{H}^{2/13}$ ), 7.32 – 7.21 (m, 8H,  $\text{H}^{1, 2/13, 3, 12, 14}$ ), 5.92 (s, 1H,  $\text{H}^7$ ), 3.74 (s, 1H,  $\text{H}^{16}$ ), 3.58 (s, 2H,  $\text{H}^5$ ), 3.40 – 3.27 (m, 2H,  $\text{H}^8$ ), 2.85 (d,  $J = 13.5$  Hz, 1H,  $\text{H}^{10a}$ ), 2.78 (dtdd,  $J = 11.8, 4.8, 3.8, 2.0$  Hz, 2H,  $\text{H}^{17a}$ ), 2.71 – 2.60 (m, 3H,  $\text{H}^{10b, 17b}$ ), 2.07 – 1.99 (m, 1H,  $\text{H}^{18a}$ ), 1.72 (dtt,  $J = 13.9, 12.4, 3.3$  Hz, 1H,  $\text{H}^{18b}$ ), 0.95 – 0.92 (s, 3H,  $\text{H}^{15}$ ).

$^{13}\text{C NMR}$  ( $\text{CDCl}_3$ , 100 MHz)  $\delta_{\text{C}}$  171.0 ( $\text{C}^6$ ), 137.2 ( $\text{C}^4$ ), 135.3 ( $\text{C}^{11}$ ), 130.8 ( $\text{C}^3$ ), 129.9 ( $\text{C}^{12}$ ), 129.1 ( $\text{C}^2$ ), 128.2 ( $\text{C}^{13}$ ), 127.4 ( $\text{C}^1$ ), 126.7 ( $\text{C}^{14}$ ), 57.6 ( $\text{C}^{16}$ ), 45.9 ( $\text{C}^8$ ), 44.3 ( $\text{C}^5$ ), 43.3 ( $\text{C}^9$ ), 42.0 ( $\text{C}^{10}$ ), 31.6 ( $\text{C}^{17a}$ ), 31.4 ( $\text{C}^{17b}$ ), 26.0 ( $\text{C}^{18}$ ), 21.6 ( $\text{C}^{15}$ ).

**HRMS** ( $\text{ES}^+$ ) exact mass calculated for  $[\text{M}+\text{H}]^+$  ( $\text{C}_{22}\text{H}_{28}\text{ON}^{32}\text{S}_2$ ) requires  $m/z$  386.1607, found  $m/z$  386.1614.

### 1.3.17. Compound 3q

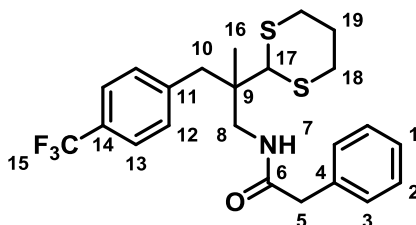

Oil, 51%.

**IR** (film)/ $\text{cm}^{-1}$   $\nu_{\text{max}}$  3304 (N-H stretch), 2971 (C-H stretch), 1647 (C=O stretch), 1540 (C-S stretch).

$^1\text{H NMR}$  ( $\text{CDCl}_3$ , 500 MHz)  $\delta_{\text{H}}$  7.52 (d,  $J = 8.0$  Hz, 2H,  $\text{H}^{13}$ ), 7.44 – 7.34 (m, 4H,  $\text{H}^{3, 12}$ ), 7.33 – 7.25 (m, 3H,  $\text{H}^{1, 2}$ ), 5.97 (t,  $J = 6.6$  Hz, 1H,  $\text{H}^7$ ), 3.66 (s, 1H,  $\text{H}^{17}$ ), 3.60 (s, 2H,  $\text{H}^5$ ), 3.40 (dd,  $J = 14.2, 6.6$  Hz, 1H,  $\text{H}^{8a}$ ), 3.25 (dd,  $J = 14.2, 6.6$  Hz, 1H,  $\text{H}^{8b}$ ), 2.92 (d,  $J = 13.4$  Hz, 1H,  $\text{H}^{10a}$ ), 2.79 (dt,  $J = 14.4, 3.6$  Hz, 2H,  $\text{H}^{17a}$ ), 2.74 – 2.57 (m, 3H,  $\text{H}^{10b, 18b}$ ), 2.04 (dtt,  $J = 10.7, 4.2, 2.2$  Hz, 1H,  $\text{H}^{19a}$ ), 1.79 – 1.65 (m, 1H,  $\text{H}^{19b}$ ), 0.91 (s, 3H,  $\text{H}^{16}$ ).

$^{13}\text{C NMR}$  ( $\text{CDCl}_3$ , 100 MHz)  $\delta_{\text{C}}$  171.2 ( $\text{C}^6$ ), 141.4 ( $\text{C}^{11}$ ), 135.2 ( $\text{C}^4$ ), 131.1 ( $\text{C}^3$ ), 129.9 ( $\text{C}^2$ ), 129.2 ( $\text{C}^{12}$ ), 129.0 (q,  $J = 32.3$  Hz,  $\text{C}^{13}$ ), 127.4 ( $\text{C}^1$ ), 125.07 (q,  $J = 3.8$  Hz,  $\text{H}^{13}$ ), 123.3 (d,  $J = 272.8$  Hz,  $\text{H}^{15}$ ), 57.4 ( $\text{C}^{17}$ ), 45.6 ( $\text{C}^8$ ), 44.3 ( $\text{C}^5$ ), 43.4 ( $\text{C}^9$ ), 41.5 ( $\text{C}^{10}$ ), 31.6 ( $\text{C}^{18a}$ ), 31.4 ( $\text{C}^{18b}$ ), 25.9 ( $\text{C}^{19}$ ), 21.6 ( $\text{C}^{16}$ ).

$^{19}\text{F NMR}$  ( $\text{CDCl}_3$ , 400 MHz)  $\delta_{\text{F}}$  -62.40.

**HRMS** ( $\text{ES}^+$ ) exact mass calculated for  $[\text{M}+\text{Na}]^+$  ( $\text{C}_{23}\text{H}_{26}\text{F}_3\text{N}^{32}\text{S}_2\text{Na}$ ) requires  $m/z$  476.2087, found  $m/z$  476.2075.

### 1.3.18. Compound 3r

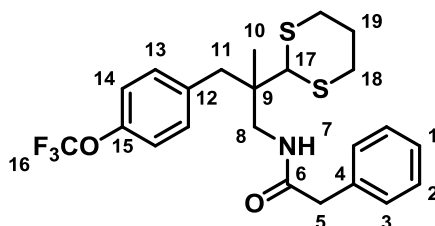

Oil, 49%.

**IR** (film)/cm<sup>-1</sup>  $\nu_{\max}$  3308 (N-H stretch), 2931 (C-H stretch), 1647 (C=O stretch), 1509 (C=C stretch).

**<sup>1</sup>H NMR** (CDCl<sub>3</sub>, 400 MHz)  $\delta_{\text{H}}$  7.41 – 7.24 (m, 7H, H<sup>1,2,3,13</sup>), 7.11 (dt,  $J = 7.6, 1.1$  Hz, 2H, H<sup>14</sup>), 5.96 (t,  $J = 6.6$  Hz, 1H, H<sup>7</sup>), 3.68 (s, 1H, H<sup>17</sup>), 3.60 (s, 1H, H<sup>11a</sup>), 2.82 – 2.76 (m, 2H, H<sup>18a</sup>), 2.71 – 2.57 (m, 3H, H<sup>11b, 18b</sup>), 2.09 – 1.99 (m, 1H, H<sup>19a</sup>), 1.72 (dtt,  $J = 13.9, 12.4, 3.2$  Hz, 1H, H<sup>19b</sup>), 0.91 (s, 3H, H<sup>10</sup>).

**<sup>13</sup>C NMR** (CDCl<sub>3</sub>, 100 MHz)  $\delta_{\text{C}}$  171.1 (C<sup>6</sup>), 148.2 (C<sup>15</sup>), 135.9 (C<sup>4</sup>), 135.2 (C<sup>3</sup>), 132.1 (C<sup>2</sup>), 129.9 (C<sup>13</sup>), 129.2 (C<sup>16</sup>), 128.8 (C<sup>12</sup>), 127.4 (C<sup>1</sup>), 120.6 (C<sup>14</sup>), 57.4 (C<sup>17</sup>), 45.7 (C<sup>8</sup>), 44.3 (C<sup>5</sup>), 43.3 (C<sup>9</sup>), 41.0 (C<sup>11</sup>), 31.6 (C<sup>18a</sup>), 31.4 (C<sup>18b</sup>), 26.0 (C<sup>19</sup>), 21.6 (C<sup>10</sup>).

**<sup>19</sup>F NMR** (CDCl<sub>3</sub>, 400 MHz)  $\delta_{\text{F}}$  -57.79.

**HRMS** (ES<sup>+</sup>) exact mass calculated for [M+H]<sup>+</sup> (C<sub>23</sub>H<sub>27</sub>ONF<sub>3</sub><sup>32</sup>S<sub>2</sub>) requires  $m/z$  454.1481, found  $m/z$  454.1475.

### 1.3.19. Compound 3s

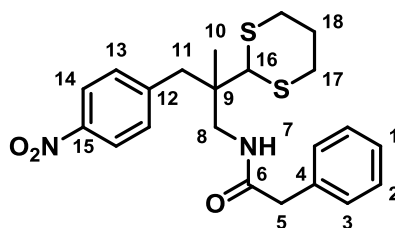

Cream solid, 55%.

**mp** 97-98 °C

**IR** (film)/cm<sup>-1</sup>  $\nu_{\max}$  3305 (N-H stretch), 2969 (C-H stretch), 1648 (C=O stretch), 1520 (C-S stretch), 1454 (N-O stretch).

**<sup>1</sup>H NMR** (CDCl<sub>3</sub>, 400 MHz)  $\delta_{\text{H}}$  8.13 (d,  $J = 8.7$  Hz, 2H, H<sup>14</sup>), 7.47 (d,  $J = 8.7$  Hz, 2H, H<sup>13</sup>), 7.44 – 7.28 (m, 5H, H<sup>1,2,3</sup>), 5.97 (s, 1H, H<sup>7</sup>), 3.64 (s, 1H, H<sup>16</sup>), 3.62 (s, 2H, H<sup>5</sup>), 3.44 (dd,  $J = 14.2, 6.9$  Hz, 1H, H<sup>8a</sup>), 3.22 (dd,  $J = 14.3, 6.4$  Hz, 1H, H<sup>8b</sup>), 2.99 (d,  $J = 13.3$  Hz, 1H, H<sup>11a</sup>), 2.80 (dt,  $J = 14.3, 3.7$  Hz, 2H, H<sup>17a</sup>), 2.73 – 2.57 (m, 3H, H<sup>17b</sup>), 2.12 – 2.00 (m, 1H, H<sup>18a</sup>), 1.81 – 1.66 (m, 1H, H<sup>18b</sup>), 0.91 (s, 3H, H<sup>10</sup>).

**<sup>13</sup>C NMR** (CDCl<sub>3</sub>, 100 MHz)  $\delta_{\text{C}}$  171.3 (C<sup>6</sup>), 147.0 (C<sup>15</sup>), 145.2 (C<sup>12</sup>), 135.1 (C<sup>4</sup>), 131.7 (C<sup>13</sup>), 129.9 (C<sup>2</sup>), 129.3 (C<sup>3</sup>), 127.5 (C<sup>1</sup>), 123.3 (C<sup>14</sup>), 57.5 (C<sup>16</sup>), 45.5 (C<sup>8</sup>), 44.3 (C<sup>5</sup>), 43.6 (C<sup>9</sup>), 41.3 (C<sup>11</sup>), 31.6 (C<sup>17a</sup>), 31.4 (C<sup>17b</sup>), 25.9 (C<sup>18</sup>), 21.6 (C<sup>10</sup>).

**HRMS** (ES<sup>+</sup>) exact mass calculated for [M+Na]<sup>+</sup> (C<sub>22</sub>H<sub>26</sub>O<sub>3</sub>N<sub>2</sub><sup>23</sup>Na<sup>32</sup>S<sub>2</sub>) requires  $m/z$  453.1277, found  $m/z$  453.1268.

### 1.3.20. Compound 3t

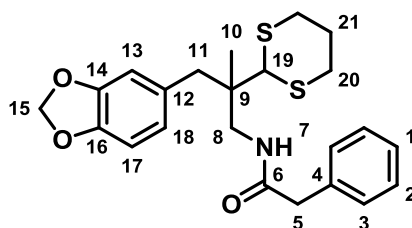

Oil, 50%.

**IR** (film)/cm<sup>-1</sup>  $\nu_{\max}$  3309 (N-H stretch), 2929 (C-H stretch), 1648 (C=O stretch), 1528 (C-S stretch).

**<sup>1</sup>H NMR** (CDCl<sub>3</sub>, 400 MHz) 7.43 – 7.34 (m, 2H, H<sup>2</sup>), 7.32 – 7.27 (m, 3H, H<sup>1,3</sup>), 6.75 (d,  $J = 1.6$  Hz, 1H, H<sup>13</sup>), 6.71 (d,  $J = 7.9$  Hz, 1H, H<sup>18</sup>), 6.67 (dd,  $J = 8.0, 1.6$  Hz, 1H, H<sup>17</sup>), 5.96 – 5.90 (m, 3H, H<sup>7,15</sup>), 3.72 (s, 1H, H<sup>19</sup>), 3.59 (s, 2H, H<sup>5</sup>), 3.31 (d,  $J = 6.5$  Hz, 2H, H<sup>8</sup>), 2.85 – 2.71 (m, 3H, H<sup>11a, 20a</sup>), 2.65 (dddd,  $J = 13.9, 12.4, 2.6, 1.1$  Hz, 2H, H<sup>20b</sup>), 2.53 (d,  $J = 13.7$  Hz, 1H, H<sup>11b</sup>), 2.07 – 1.98 (m, 1H, H<sup>21a</sup>), 1.71 (dtt,  $J = 13.7, 12.4, 3.3$  Hz, 1H, H<sup>21b</sup>), 0.92 (s, 3H, H<sup>10</sup>).

**<sup>13</sup>C NMR** (CDCl<sub>3</sub>, 100 MHz)  $\delta_{\text{C}}$  171.0 (C<sup>6</sup>), 147.5 (C<sup>14</sup>), 146.4 (C<sup>16</sup>), 135.3 (C<sup>4</sup>), 130.7 (C<sup>12</sup>), 129.9 (C<sup>1</sup>), 129.1 (C<sup>2</sup>), 127.4 (C<sup>3</sup>), 123.8 (C<sup>18</sup>), 111.1 (C<sup>13</sup>), 108.1 (C<sup>17</sup>), 101.0 (C<sup>15</sup>), 57.6 (C<sup>19</sup>), 45.9 (C<sup>8</sup>), 44.4 (C<sup>5</sup>), 43.4 (C<sup>9</sup>), 41.7 (C<sup>11</sup>), 31.6 (C<sup>20a</sup>), 31.4 (C<sup>20b</sup>), 26.0 (C<sup>21</sup>), 21.6 (C<sup>10</sup>).

**HRMS** (ES<sup>+</sup>) exact mass calculated for [M+Na]<sup>+</sup> (C<sub>23</sub>H<sub>27</sub>O<sub>3</sub>N<sup>23</sup>Na<sup>32</sup>S<sub>2</sub>) requires  $m/z$  452.1325, found  $m/z$  452.1324.

### 1.3.21. Compound 3u

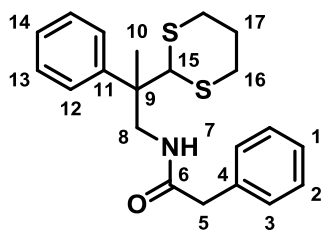

Oil, 36%.

**IR** (film)/cm<sup>-1</sup>  $\nu_{\max}$  3308 (N-H stretch), 2980 (C-H stretch), 1649 (C=O stretch), 1529 (C-S stretch).

**<sup>1</sup>H NMR** (CDCl<sub>3</sub>, 500 MHz)  $\delta_{\text{H}}$  7.31 – 7.19 (m, 8H, H<sup>1,2,3,13,14</sup>), 7.08 – 7.00 (m, 2H, H<sup>12</sup>), 5.29 (s, 1H, H<sup>7</sup>), 4.26 (s, 1H, H<sup>15</sup>), 3.87 (dd,  $J = 13.8, 7.1$  Hz, 1H, H<sup>8a</sup>), 3.55 (dd,  $J = 13.8, 5.1$  Hz, 1H, H<sup>8b</sup>), 3.49 (d,  $J = 16.0$  Hz, 1H, H<sup>5a</sup>), 3.45 (d,  $J = 16.1$  Hz, 1H, H<sup>5b</sup>), 2.86 – 2.77 (m, 2H, H<sup>16a</sup>), 2.74 – 2.65 (m, 2H, H<sup>16b</sup>), 2.08 – 1.95 (m, 1H, H<sup>17a</sup>), 1.74 (ddtd,  $J = 15.6, 9.5, 7.9, 6.3$  Hz, 1H, H<sup>17b</sup>), 1.43 (s, 3H, H<sup>10</sup>).

**<sup>13</sup>C NMR** (CDCl<sub>3</sub>, 126 MHz)  $\delta_{\text{C}}$  170.8 (C<sup>6</sup>), 142.0 (C<sup>11</sup>), 134.7 (C<sup>4</sup>), 129.4 (C<sup>3</sup>), 129.0 (C<sup>2</sup>), 128.5 (C<sup>13</sup>), 127.2 (C<sup>1</sup>), 127.2 (C<sup>14</sup>), 126.5 (C<sup>12</sup>), 59.2 (C<sup>15</sup>), 47.8 (C<sup>8</sup>), 46.8 (C<sup>9</sup>), 44.0 (C<sup>5</sup>), 31.7 (C<sup>16a</sup>), 31.4 (C<sup>16b</sup>), 25.9 (C<sup>17</sup>), 20.3 (C<sup>10</sup>).

**HRMS** (ES<sup>+</sup>) exact mass calculated for [M+H]<sup>+</sup> (C<sub>21</sub>H<sub>26</sub>ON<sup>32</sup>S<sub>2</sub>) requires  $m/z$  372.1450, found  $m/z$  372.1448.

### 1.3.22. Compound 3v

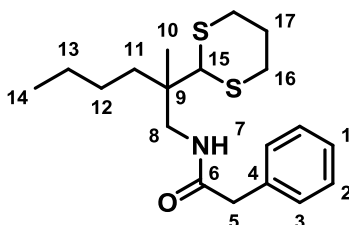

Oil, 56%.

**IR** (film)/cm<sup>-1</sup>  $\nu_{\max}$  3309 (N-H stretch), 2931 (C-H stretch), 1648 (C=O stretch), 1544 (C-S stretch).

**<sup>1</sup>H NMR** (CDCl<sub>3</sub>, 400 MHz) 7.41 – 7.35 (m, 2H, H<sup>2</sup>), 7.32 – 7.27 (m, 3H, H<sup>1,3</sup>), 5.88 (s, 1H, H<sup>15</sup>), 3.74 (s, 1H, H<sup>15</sup>), 3.60 (s, 2H, H<sup>5</sup>), 3.36 – 3.22 (m, 2H, H<sup>8</sup>), 2.82 – 2.72 (m, 2H, H<sup>16a</sup>), 2.71 – 2.59 (m, 2H, H<sup>16b</sup>), 2.02 (dtt,  $J = 13.5, 4.1, 2.5$  Hz, 1H, H<sup>17a</sup>), 1.70 (dtt,  $J = 14.0, 12.3, 3.4$  Hz, 1H, H<sup>17b</sup>), 1.53 – 1.37 (m, 1H, H<sup>11a</sup>), 1.34 – 1.15 (m, 5H, H<sup>11b,12,13</sup>), 0.96 (s, 3H, H<sup>10</sup>), 0.93 – 0.84 (m, 3H, H<sup>14</sup>).

**<sup>13</sup>C NMR** (CDCl<sub>3</sub>, 100 MHz)  $\delta_{\text{C}}$  171.0 (C<sup>6</sup>), 135.5 (C<sup>4</sup>), 129.9 (C<sup>2</sup>), 129.2 (C<sup>3</sup>), 127.4 (C<sup>1</sup>), 58.6 (C<sup>15</sup>), 45.6 (C<sup>8</sup>), 44.4 (C<sup>5</sup>), 42.3 (C<sup>9</sup>), 36.2 (C<sup>11</sup>), 31.6 (C<sup>16a</sup>), 31.6 (C<sup>16b</sup>), 26.2 (C<sup>17</sup>), 25.7 (C<sup>12</sup>), 23.5 (C<sup>13</sup>), 21.5 (C<sup>10</sup>), 14.2 (C<sup>14</sup>).

**HRMS** (ES<sup>+</sup>) exact mass calculated for [M+H]<sup>+</sup> (C<sub>19</sub>H<sub>30</sub>ON<sup>32</sup>S<sub>2</sub>) requires  $m/z$  352.1763, found  $m/z$  352.1757.

### 1.3.23. Compound 3w

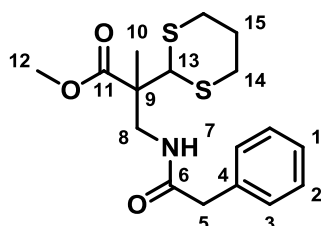

Oil, 47%.

**IR** (film)/cm<sup>-1</sup>  $\nu_{\max}$  3308 (N-H stretch), 2940 (C-H stretch), 1732 (C=O ester stretch), 1654 (C=O amide stretch), 1546 (C-S stretch).

**<sup>1</sup>H NMR** (CDCl<sub>3</sub>, 400 MHz)  $\delta_{\text{H}}$  7.40 – 7.27 (m, 5H, H<sup>1,2,3</sup>), 5.87 (s, 1H, H<sup>7</sup>), 4.29 (s, 1H, H<sup>13</sup>), 3.70 (dd,  $J = 14.1, 7.3$  Hz, 1H, H<sup>8a</sup>), 3.63 (s, 3H, H<sup>12</sup>), 3.57 (d,  $J = 1.7$  Hz, 2H, H<sup>5</sup>), 3.42 (dd,  $J = 14.0, 5.7$  Hz, 1H, H<sup>8b</sup>), 2.90 – 2.68 (m, 4H, H<sup>14</sup>), 2.11 – 2.01 (m, 1H, H<sup>15a</sup>), 1.85 – 1.71 (m, 1H, H<sup>15b</sup>), 1.24 (s, 3H, H<sup>10</sup>).

**<sup>13</sup>C NMR** (CDCl<sub>3</sub>, 100 MHz)  $\delta_{\text{C}}$  174.0 (C<sup>11</sup>), 171.0 (C<sup>6</sup>), 135.2 (C<sup>4</sup>), 129.7 (C<sup>2</sup>), 129.2 (C<sup>3</sup>), 127.5 (C<sup>1</sup>), 54.8 (C<sup>13</sup>), 52.6 (C<sup>12</sup>), 51.8 (C<sup>9</sup>), 44.2 (C<sup>5</sup>), 44.1 (C<sup>8</sup>), 31.6 (C<sup>14a</sup>), 31.4 (C<sup>14b</sup>), 26.0 (C<sup>15</sup>), 18.2 (C<sup>10</sup>).

**HRMS** (ES<sup>+</sup>) exact mass calculated for [M+Na]<sup>+</sup> (C<sub>17</sub>H<sub>23</sub>O<sub>3</sub>N<sup>23</sup>Na<sup>32</sup>S<sub>2</sub>) requires  $m/z$  376.1012, found  $m/z$  376.1006.

### 1.3.24. Compound 3x

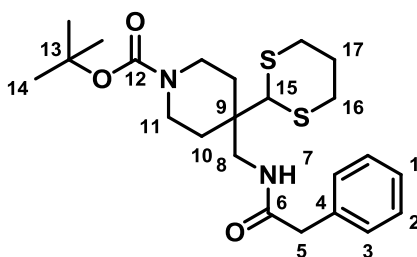

Clear crystalline solid, 53%.

**mp** 24-25 °C.

**IR** (film)/cm<sup>-1</sup>  $\nu_{\max}$  3291 (N-H stretch), 2980 (C-H stretch), 1685 (C=O carbamate stretch), 1652 (C=O amide stretch), 1525 (C-S stretch).

**<sup>1</sup>H NMR** (CDCl<sub>3</sub>, 500 MHz) 7.39 – 7.35 (m, 2H, H<sup>2</sup>), 7.32 – 7.27 (m, 3H, H<sup>1,3</sup>), 6.08 (t, *J* = 6.7 Hz, 1H, H<sup>7</sup>), 3.90 (s, 1H, H<sup>15</sup>), 3.60 (s, 2H, H<sup>5</sup>), 3.59 – 3.23 (m, 6H, H<sup>8,11</sup>), 2.77 (dt, *J* = 14.1, 3.7 Hz, 2H, H<sup>16a</sup>), 2.67 (t, *J* = 13.2 Hz, 2H, H<sup>16b</sup>), 2.04 (dt, *J* = 13.5, 4.1, 2.5 Hz, 1H, H<sup>17a</sup>), 1.79 – 1.61 (m, 3H, H<sup>10a,17b</sup>), 1.44 (s, 11H, H<sup>10b,14</sup>).

**<sup>13</sup>C NMR** (CDCl<sub>3</sub>, 125 MHz)  $\delta_{\text{C}}$  171.2 (C<sup>6</sup>), 155.0 (C<sup>12</sup>), 135.2 (C<sup>4</sup>), 129.9 (C<sup>3</sup>), 129.1 (C<sup>2</sup>), 127.4 (C<sup>1</sup>), 79.6 (C<sup>13</sup>), 57.4 (C<sup>15</sup>), 44.2 (C<sup>5</sup>), 42.4 (C<sup>8</sup>), 41.0 (C<sup>9</sup>), 40.0 (C<sup>11a</sup>), 39.1 (C<sup>11b</sup>), 31.6 (C<sup>16</sup>), 31.3 (C<sup>10</sup>), 28.6 (C<sup>14</sup>), 26.2 (C<sup>17</sup>).

**HRMS** (ES<sup>+</sup>) exact mass calculated for [M+Na]<sup>+</sup> (C<sub>23</sub>H<sub>34</sub>O<sub>3</sub>N<sub>2</sub><sup>23</sup>Na<sup>32</sup>S<sub>2</sub>) requires *m/z* 473.1903, found *m/z* 473.1898.

## 1.4. Derivatisation

### 1.4.1. Compound 6

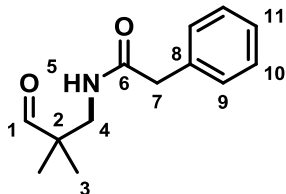

To a solution of **3a** (30.9 mg, 0.1 mmol) in MeCN (3 mL) was added TFA (77  $\mu$ L, 1 mmol) followed by PhI(OAc)<sub>2</sub> (97 mg, 0.3 mmol). The reaction was stirred for 10 minutes or until full disappearance of the starting material by TLC. The reaction mixture was diluted with water, extracted with diethyl ether and the combined organic layers dried over magnesium sulfate and concentrated *in vacuo*. The crude product was purified by flash column chromatography to give **6** as an oil (16.8 mg, 0.077 mmol, 77%).

**IR** (film)/cm<sup>-1</sup>  $\nu_{\max}$  3301 (N-H stretch), 2980 (C-H stretch), 2929 (C-H stretch), 1723 (C=O aldehyde stretch), 1651 (C=O amide stretch), 1544 (C-S stretch).

**<sup>1</sup>H NMR** (CDCl<sub>3</sub>, 400 MHz)  $\delta_{\text{H}}$  9.36 (s, 1H, H<sup>1</sup>), 7.36 (ddt, *J* = 8.1, 6.6, 1.1 Hz, 2H, H<sup>10</sup>), 7.32 – 7.27 (m, 1H, H<sup>11</sup>), 7.25 – 7.20 (m, 2H, H<sup>9</sup>), 5.73 (s, 1H, H<sup>5</sup>), 3.55 (s, 2H, H<sup>7</sup>), 3.32 (d, *J* = 6.5 Hz, 2H, H<sup>4</sup>), 1.01 (s, 6H, H<sup>3</sup>).

**<sup>13</sup>C NMR** (CDCl<sub>3</sub>, 100 MHz)  $\delta_{\text{C}}$  205.3 (C<sup>1</sup>), 171.2 (C<sup>6</sup>), 134.9 (C<sup>8</sup>), 129.5 (C<sup>10</sup>), 129.2 (C<sup>9</sup>), 127.6 (C<sup>11</sup>), 47.6 (C<sup>2</sup>), 44.4 (C<sup>4</sup>), 44.0 (C<sup>7</sup>), 19.7 (C<sup>3</sup>).

**HRMS** (ES<sup>+</sup>) exact mass calculated for [M+H]<sup>+</sup> (C<sub>13</sub>H<sub>18</sub>O<sub>2</sub>N) requires *m/z* 220.1332, found *m/z* 220.1335.

### 1.4.2. Compound 7

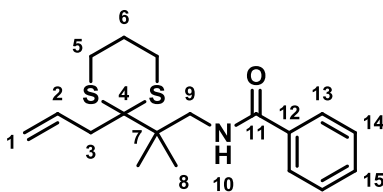

A solution of **3e** (20 mg, 0.068 mmol) in tetrahydrofuran (3 mL) cooled to -78 °C was added *n*-BuLi (0.13 mL, 1.6M in hexane, 0.20 mmol). The reaction was stirred for 15 minutes, before addition of allyl bromide (29  $\mu$ L, 0.34 mmol). The reaction was warmed slowly to room temperature and stirred for a further 3 hours. The reaction was diluted with saturated ammonium chloride and extracted with ethyl acetate. The combined organic layers were washed with brine, dried over sodium sulfate and concentrated *in vacuo*. The crude product was purified by flash column chromatography to give **7** as an oil (14 mg, 61%).

**IR** (film)/cm<sup>-1</sup>  $\nu_{\max}$  3324 (N-H stretch), 2973 (C-H stretch), 2933 (C-H stretch), 1645 (C=O stretch), 1537 (C=C stretch).  
**<sup>1</sup>H NMR** (CDCl<sub>3</sub>, 500 MHz)  $\delta_{\text{H}}$  7.86 (d,  $J = 7.3$  Hz, 2H, H<sup>13</sup>), 7.53 – 7.36 (m, 3H, H<sup>14, 15</sup>), 7.30 (s, 1H, H<sup>10</sup>), 6.13 (ddt,  $J = 17.0, 10.2, 6.8$  Hz, 1H, H<sup>2</sup>), 5.20 (dt,  $J = 17.1, 1.9$  Hz, 1H, H<sup>1a</sup>), 5.12 (dd,  $J = 10.2, 1.8$  Hz, 1H, H<sup>1b</sup>), 3.73 (d,  $J = 6.1$  Hz, 2H, H<sup>9</sup>), 3.11 – 2.99 (m, 4H, H<sup>3, 5a</sup>), 2.76 (dt,  $J = 14.5, 4.2$  Hz, 2H, H<sup>5b</sup>), 2.10 (dp,  $J = 12.0, 3.9$  Hz, 1H, H<sup>6a</sup>), 1.92 – 1.78 (m, 1H, H<sup>6b</sup>), 1.22 (s, 6H, H<sup>8</sup>).  
**<sup>13</sup>C NMR** (CDCl<sub>3</sub>, 100 MHz)  $\delta_{\text{C}}$  167.4 (C<sup>11</sup>), 136.5 (C<sup>2</sup>), 135.1 (C<sup>12</sup>), 131.4 (C<sup>15</sup>), 128.7 (C<sup>14</sup>), 127.1 (C<sup>13</sup>), 116.8 (C<sup>1</sup>), 60.9 (C<sup>4</sup>), 48.6 (C<sup>9</sup>), 44.7 (C<sup>7</sup>), 41.3 (C<sup>3</sup>), 26.7 (C<sup>5</sup>), 24.9 (C<sup>6</sup>), 22.8 (C<sup>8</sup>).  
**HRMS** (ES<sup>+</sup>) exact mass calculated for [M+H]<sup>+</sup> (C<sub>18</sub>H<sub>26</sub>ON<sup>32</sup>S<sub>2</sub>) requires  $m/z$  336.1450, found  $m/z$  336.1450.

### 1.4.3. Compound 8

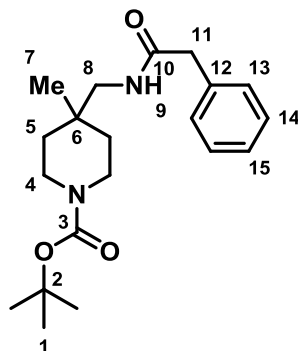

To a solution of **3x** (30 mg, 0.067 mmol) in ethanol (3 mL) was added Raney nickel (100 mg) and the reaction slurry stirred for 5 hours. The reaction was filtered through a pad of celite, taking care not to let the Raney nickel dry out. The filtrate was concentrated and the crude product was purified by flash column chromatography to give **8** as a clear oil (20.3 mg, 88%).

**IR** (film)/cm<sup>-1</sup>  $\nu_{\max}$  3311 (N-H stretch), 2980 (C-H stretch), 2926 (C-H stretch), 1691 (C=O carbamate stretch), 1652 (C=O amide stretch), 1552 (C=C stretch).  
**<sup>1</sup>H NMR** (CDCl<sub>3</sub>, 500 MHz)  $\delta_{\text{H}}$  7.31 (t,  $J = 7.4$  Hz, 2H, H<sup>12</sup>), 7.31 (t,  $J = 7.4$  Hz, 1H, H<sup>15</sup>), 7.28 – 7.24 (m, 2H, H<sup>14</sup>), 5.35 (s, 1H, H<sup>9</sup>), 3.69 – 3.50 (m, 4H, H<sup>11, 4a</sup>), 3.13 (ddd,  $J = 13.5, 9.3, 3.7$  Hz, 2H, H<sup>4b</sup>), 1.44 (s, 9H, H<sup>1</sup>), 1.30 – 1.22 (m, 2H, H<sup>5a</sup>), 1.16 (dt,  $J = 13.8, 4.0$  Hz, 2H, H<sup>5b</sup>), 0.80 (s, 3H, H<sup>7</sup>).  
**<sup>13</sup>C NMR** (CDCl<sub>3</sub>, 126 MHz)  $\delta_{\text{C}}$  171.3 (C<sup>10</sup>), 155.0 (C<sup>3</sup>), 135.0 (C<sup>12</sup>), 129.6 (C<sup>13</sup>), 129.3 (C<sup>14</sup>), 127.7 (C<sup>15</sup>), 79.5 (C<sup>2</sup>), 48.7 (C<sup>4</sup>), 44.1 (C<sup>8</sup>), 34.4 (C<sup>5</sup>), 33.4 (C<sup>6</sup>), 28.6 (C<sup>1</sup>), 22.0 (C<sup>7</sup>).  
**HRMS** (ES<sup>+</sup>) exact mass calculated for [M+H]<sup>+</sup> (C<sub>20</sub>H<sub>31</sub>O<sub>3</sub>N<sub>2</sub>) requires  $m/z$  347.2329, found  $m/z$  347.2326.



### 3. NMR Spectra

#### 3.1. Compound 2b

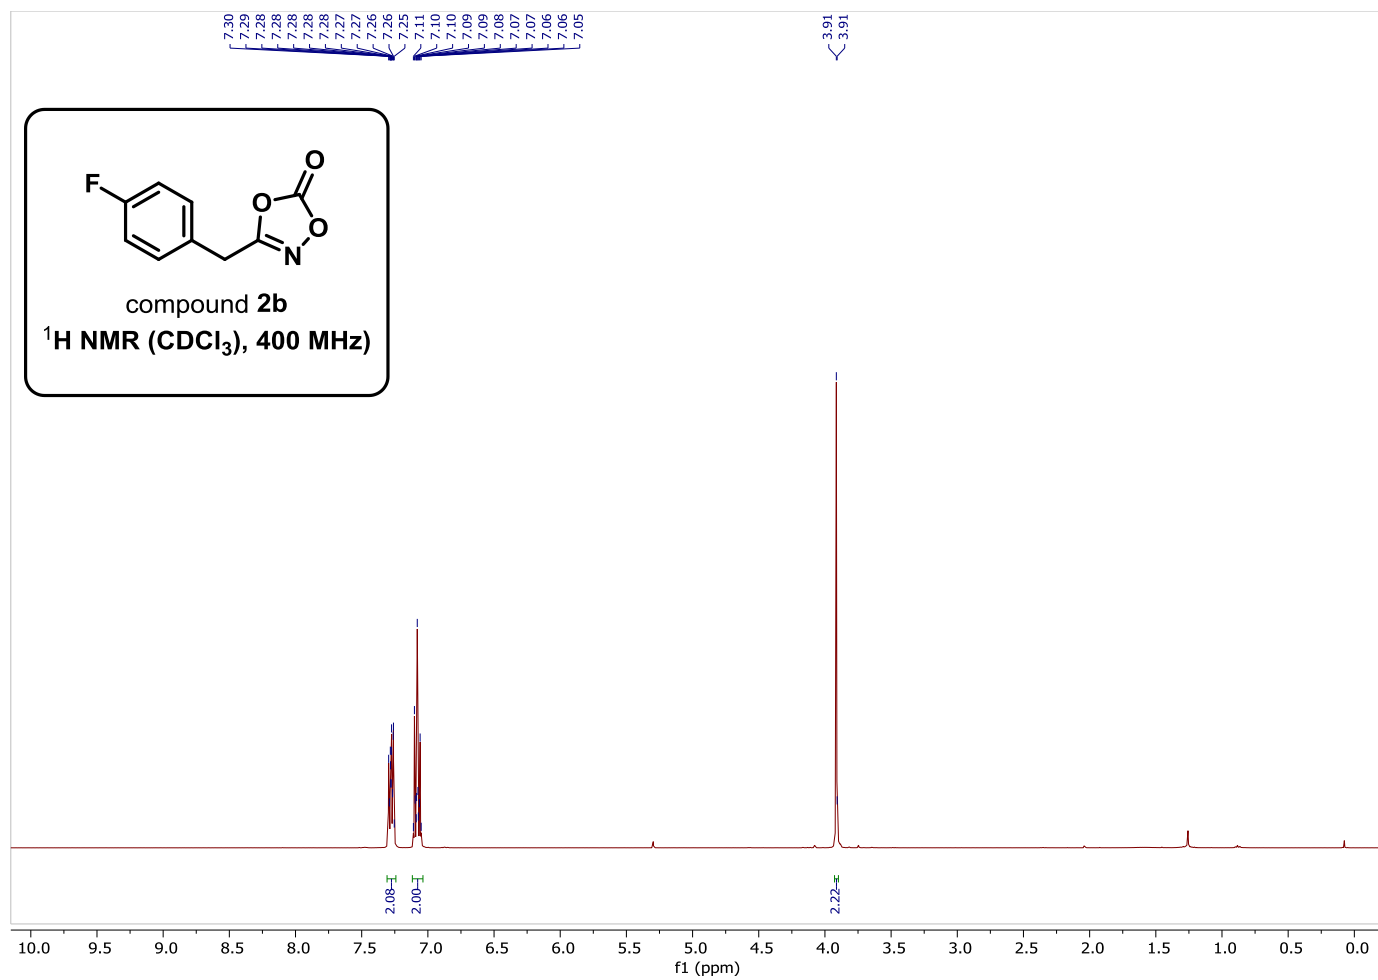

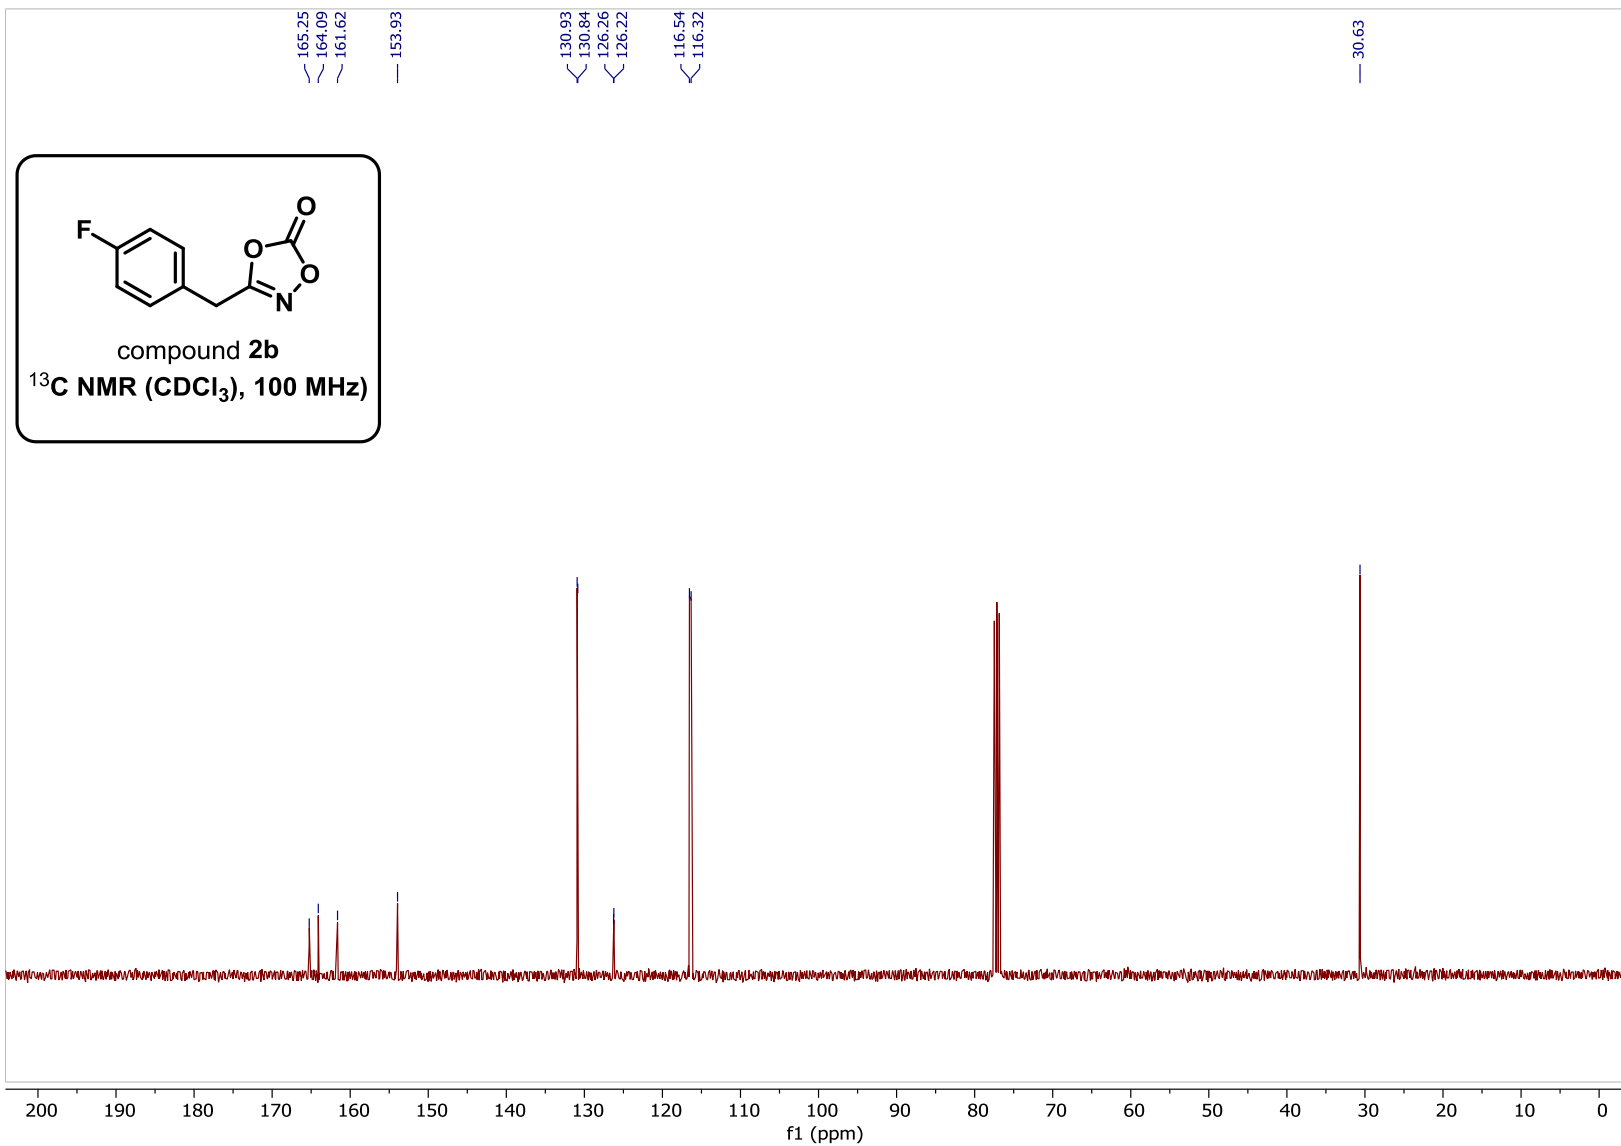

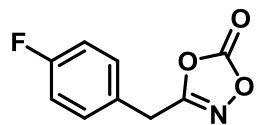

compound **2b**  
 $^{19}\text{F}$  NMR ( $\text{CDCl}_3$ ), 377 MHz)

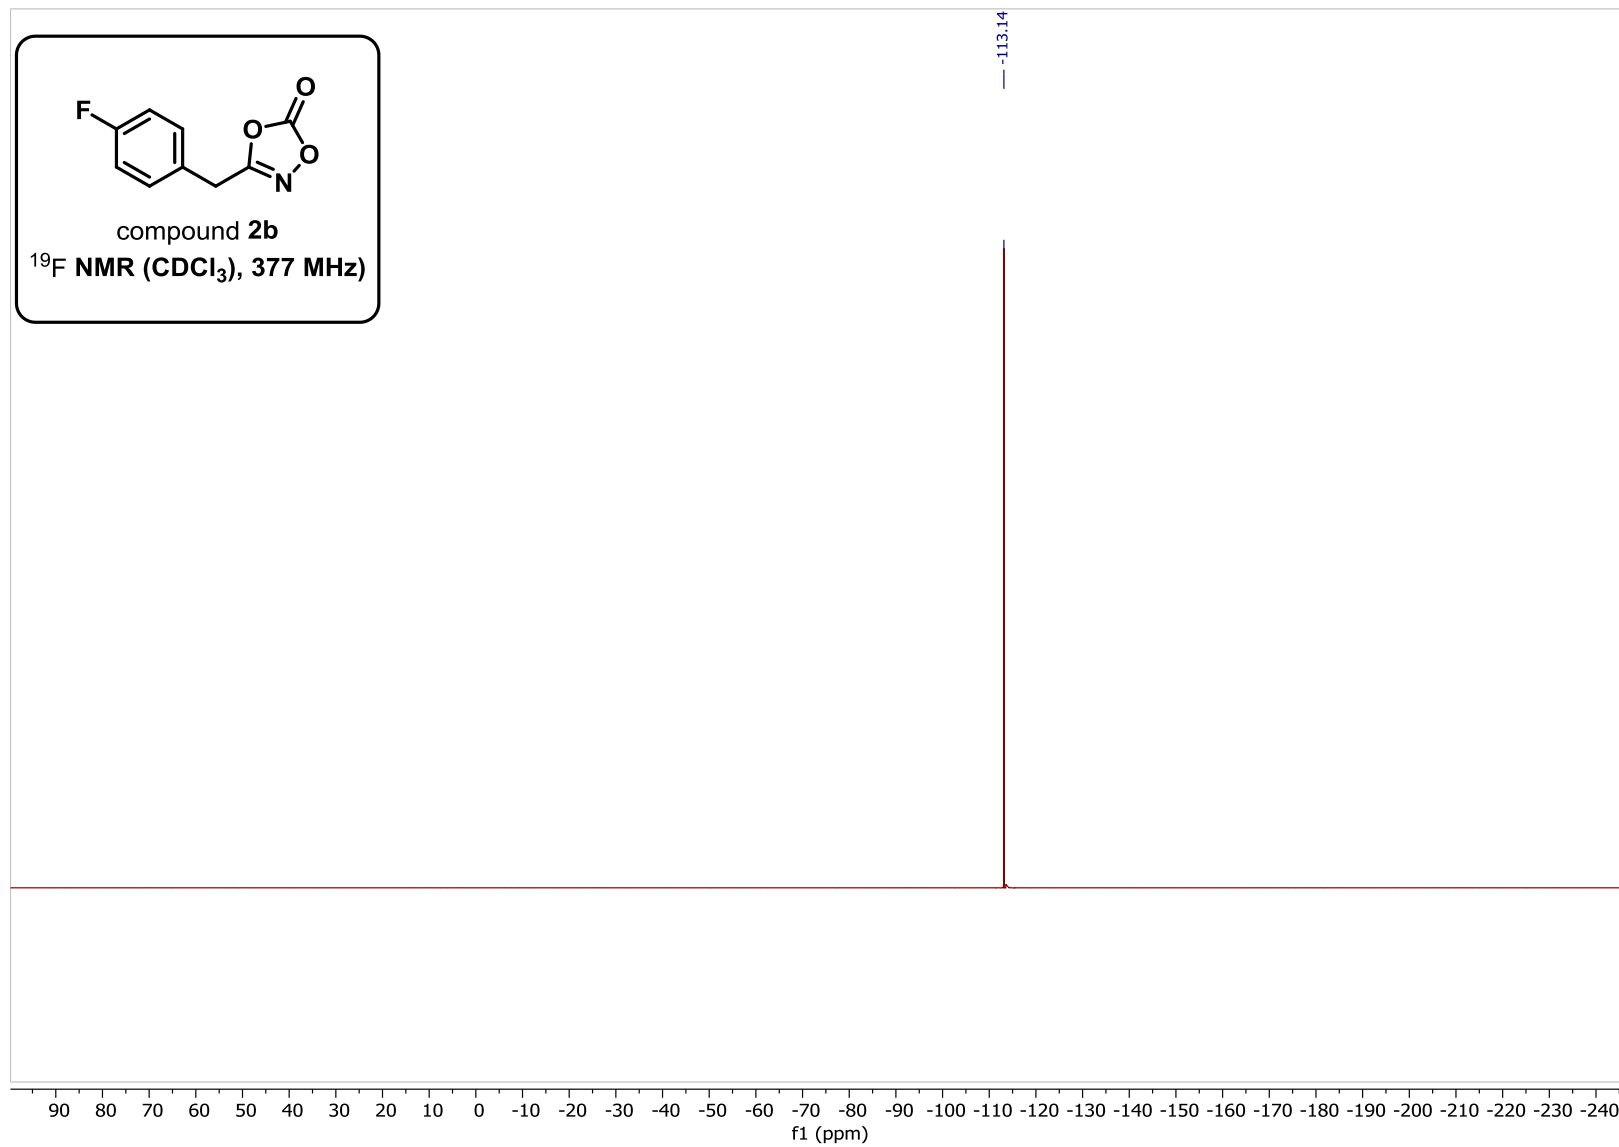

3.2. Compound 2c

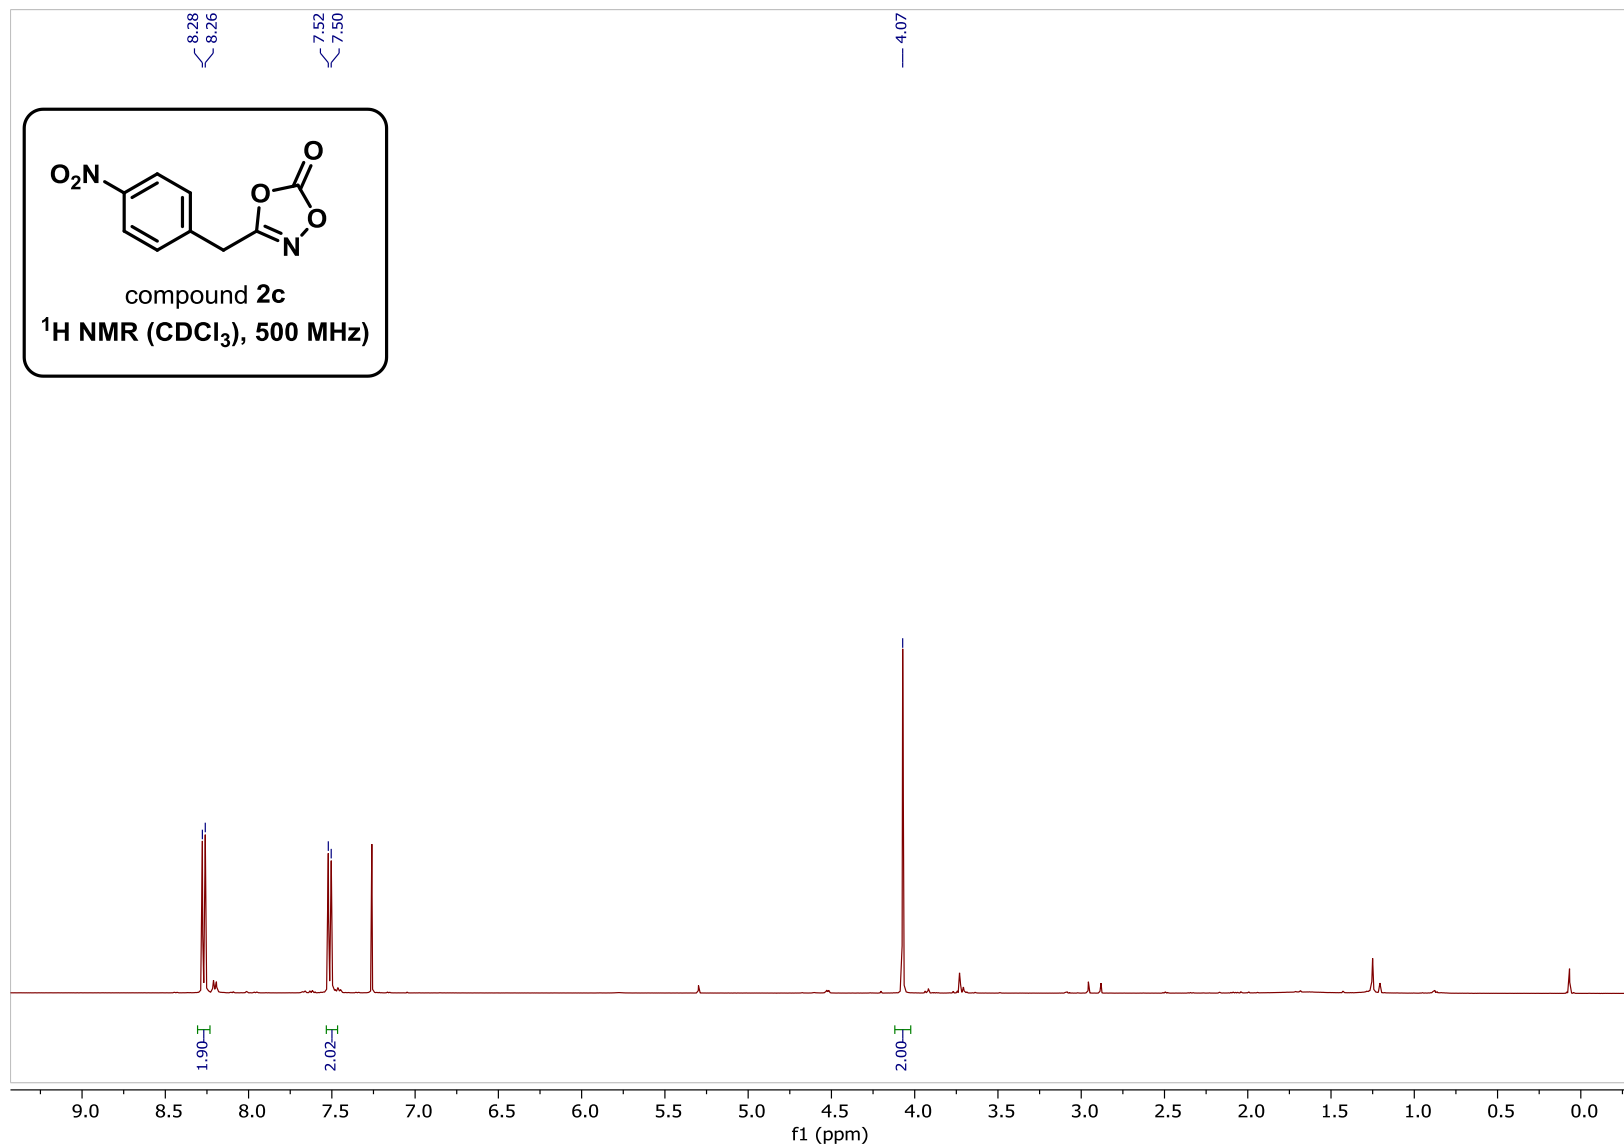

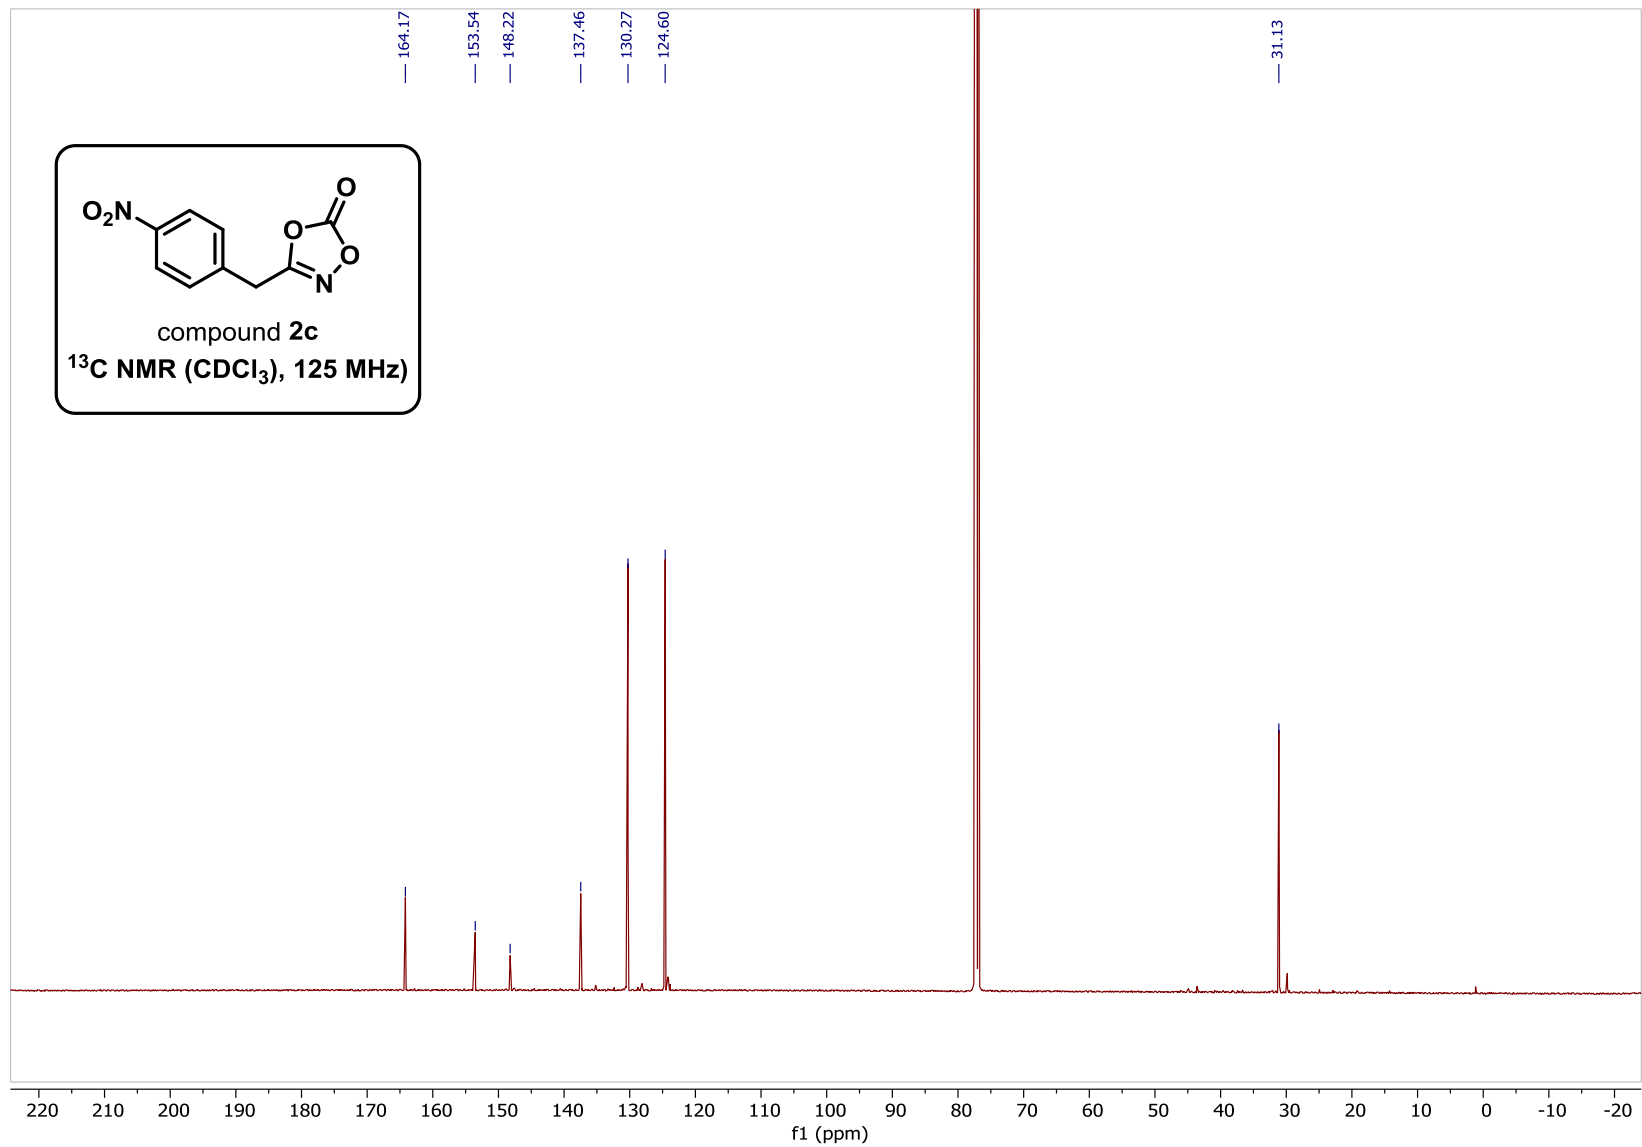

3.3. Compound 3g

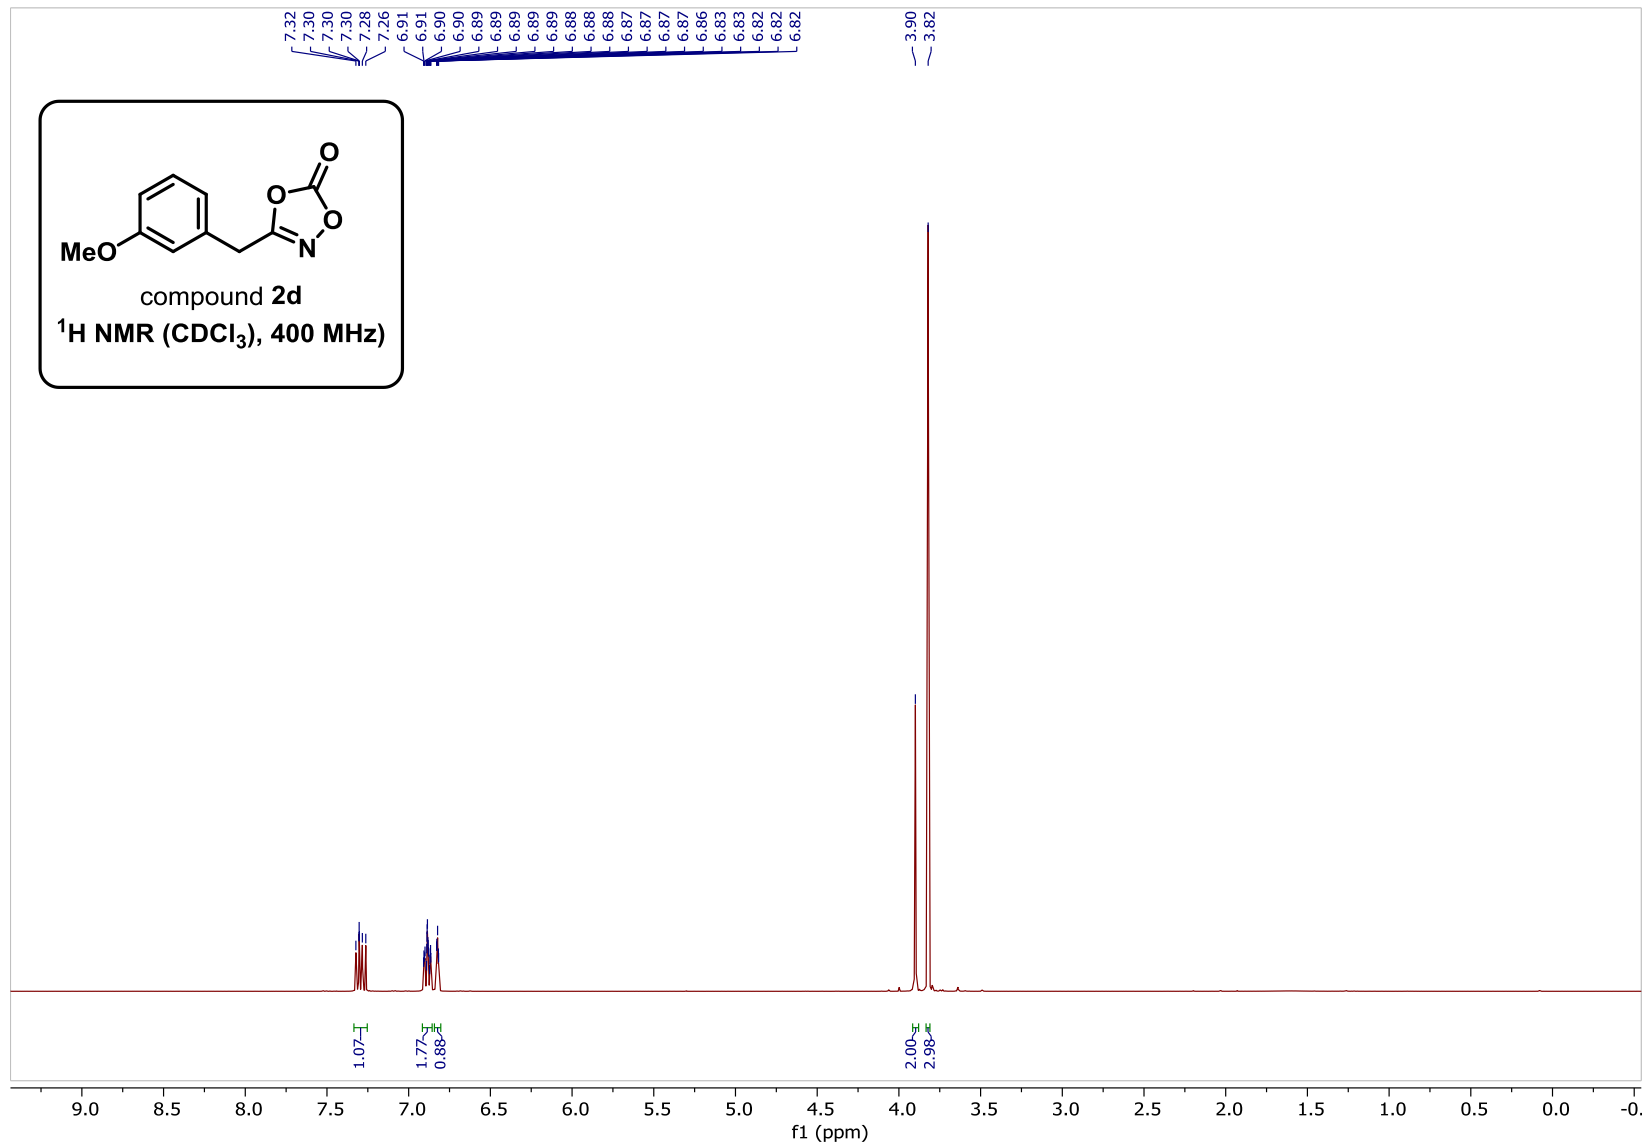

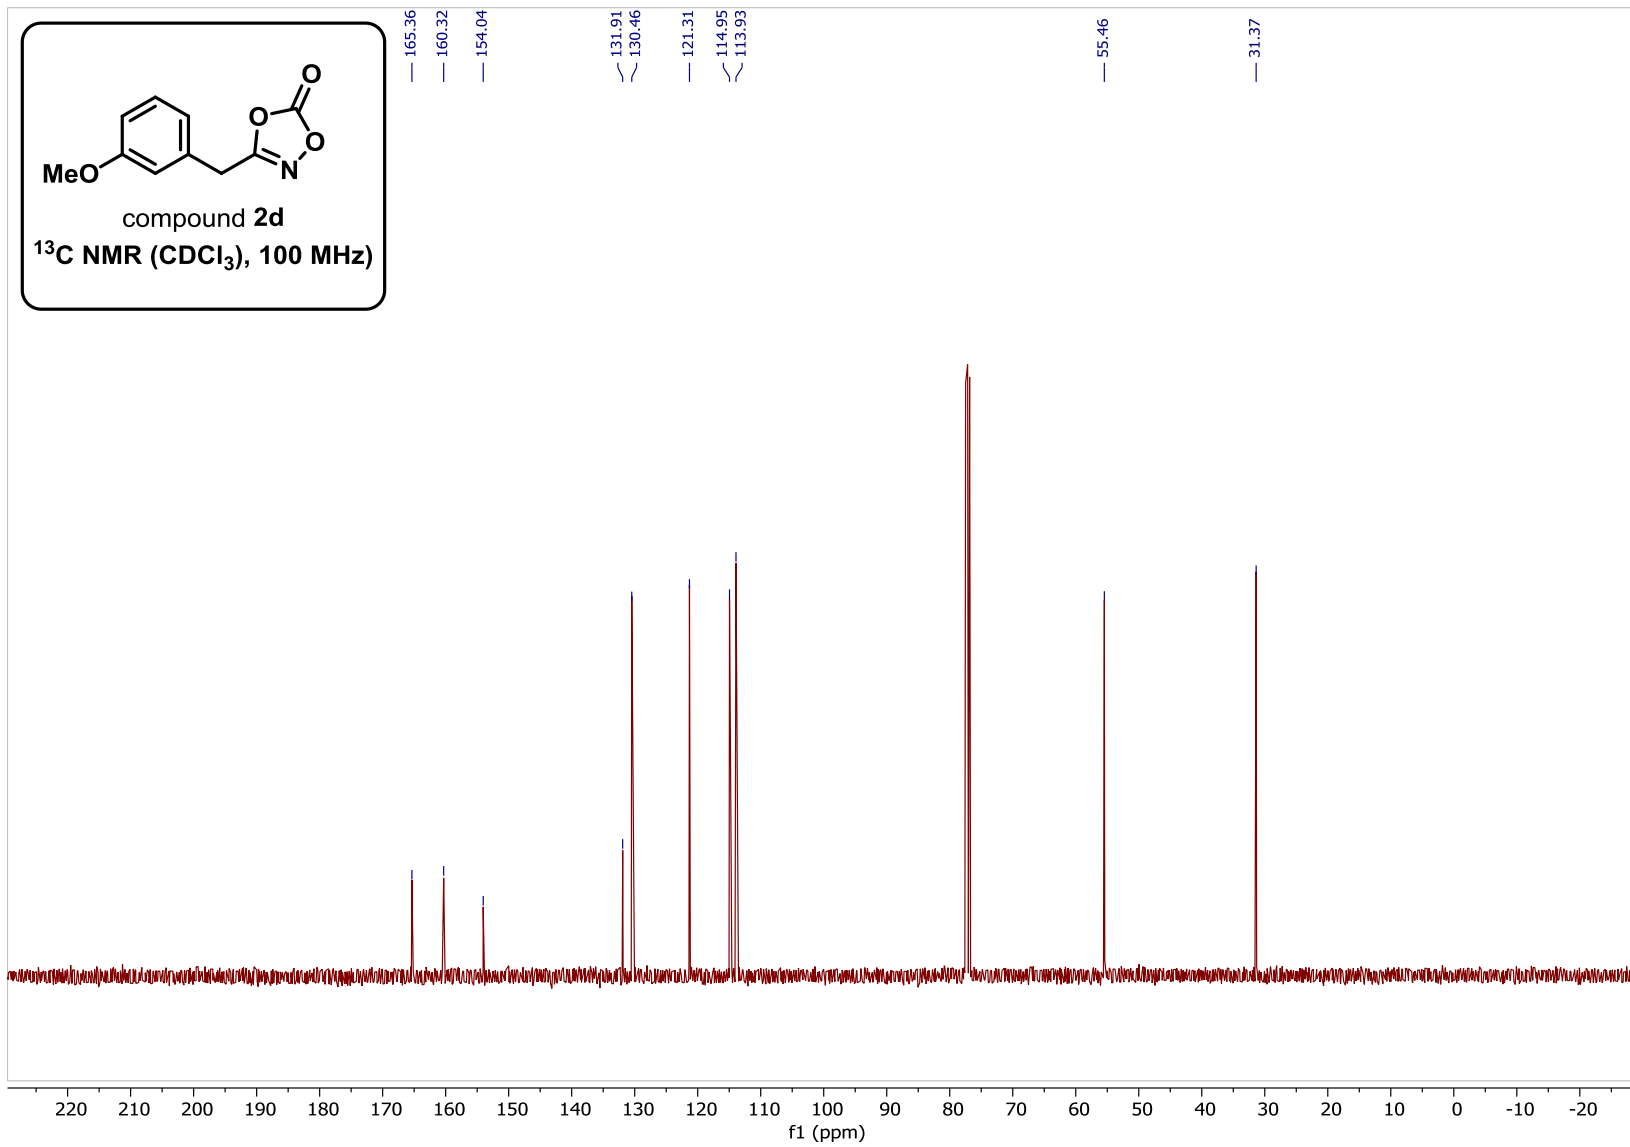

3.4. Compound 2g

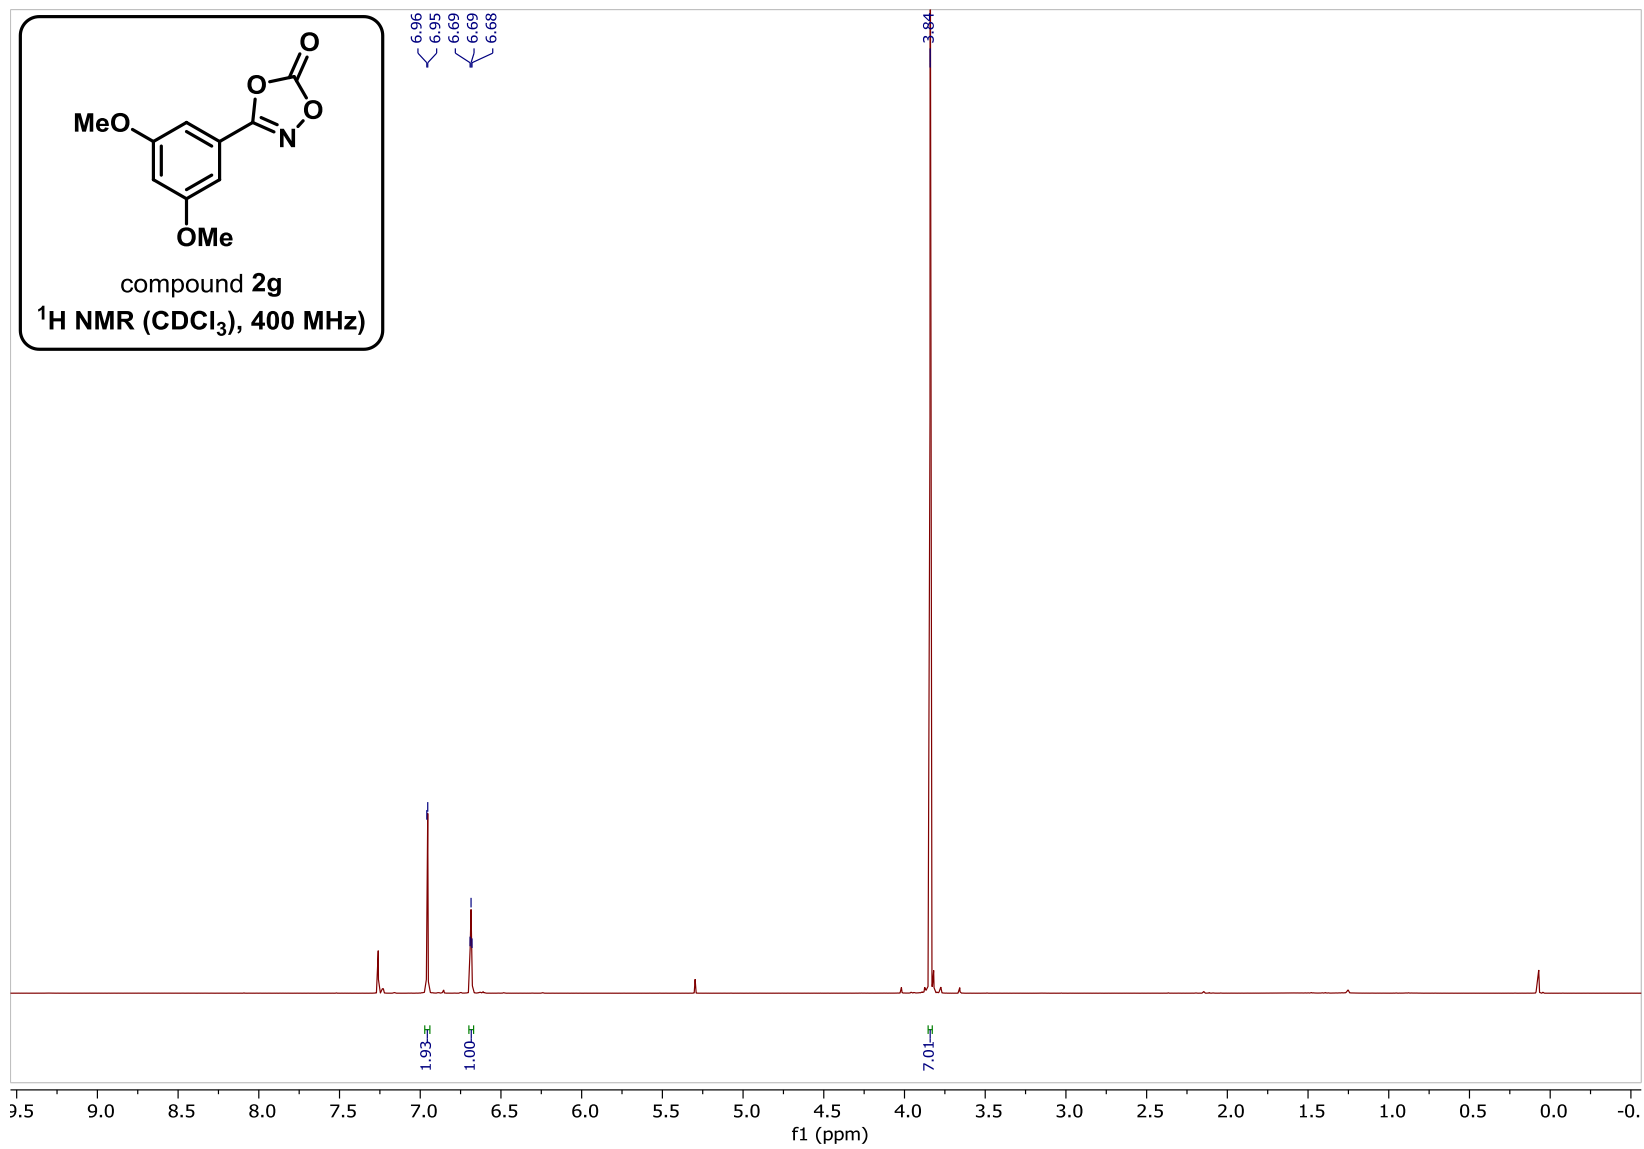



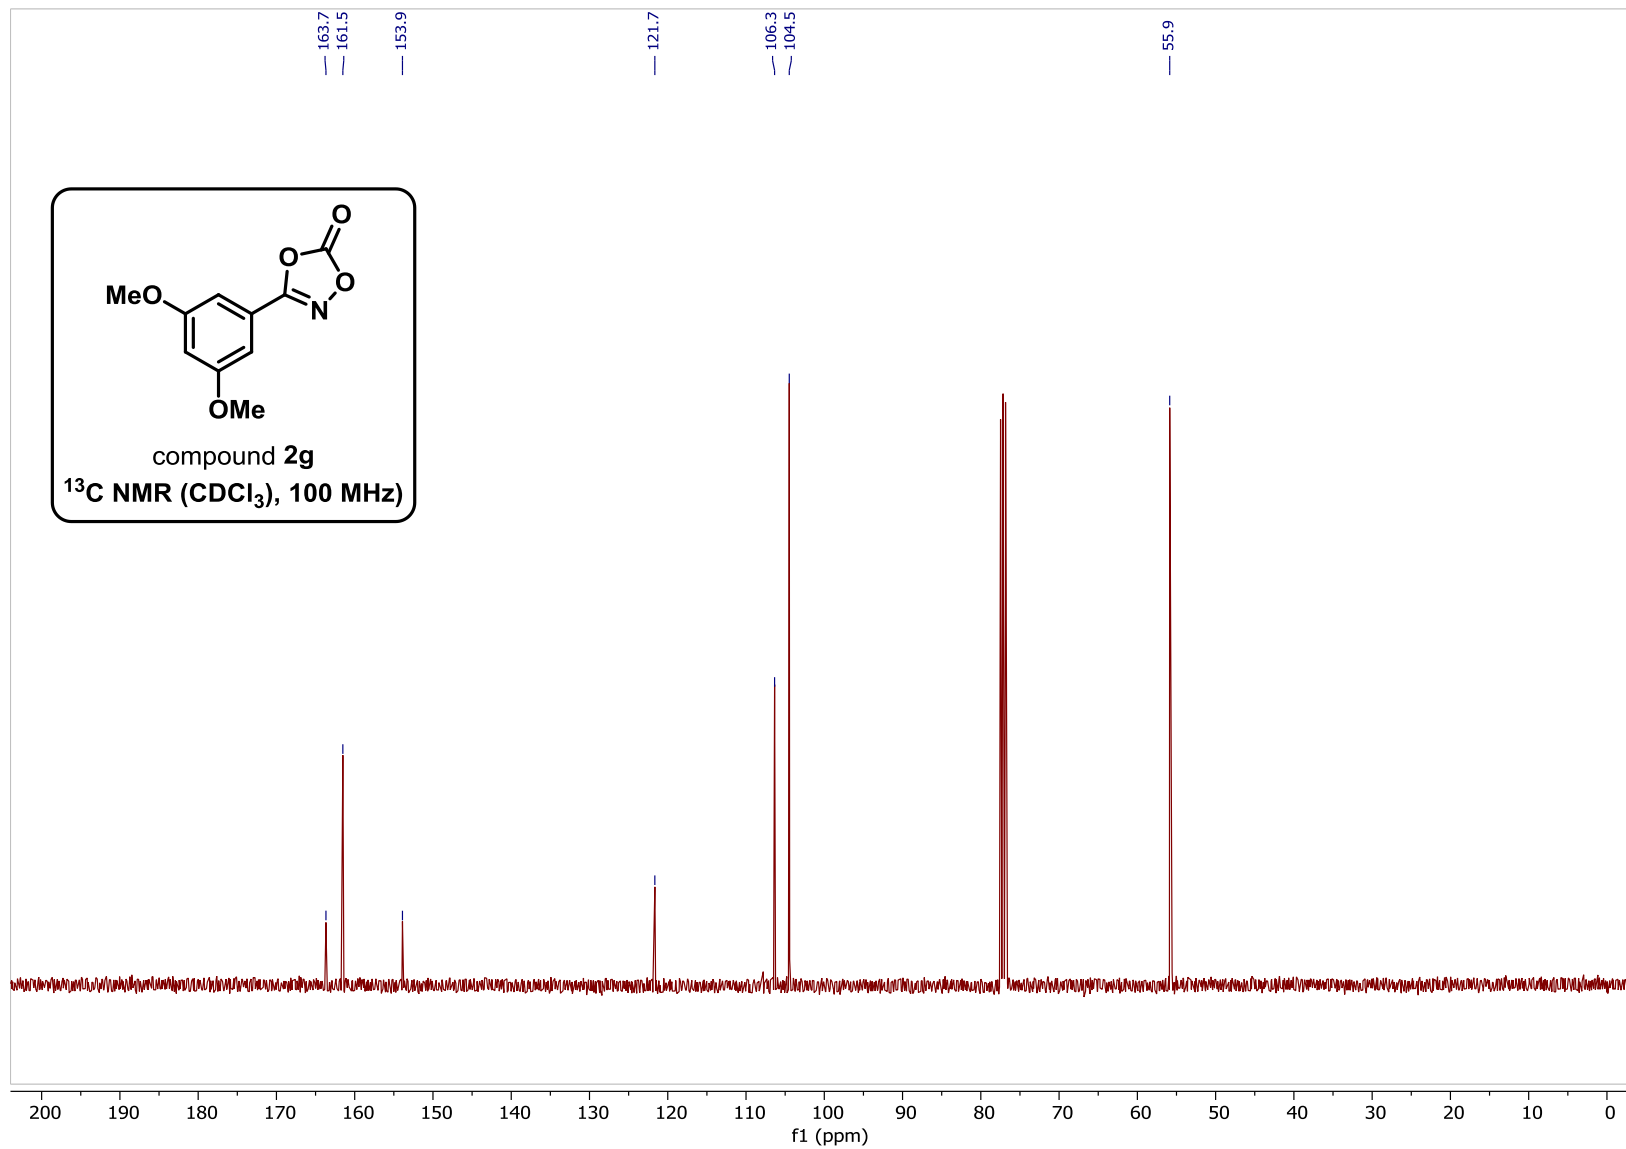

3.5. Compound 2i

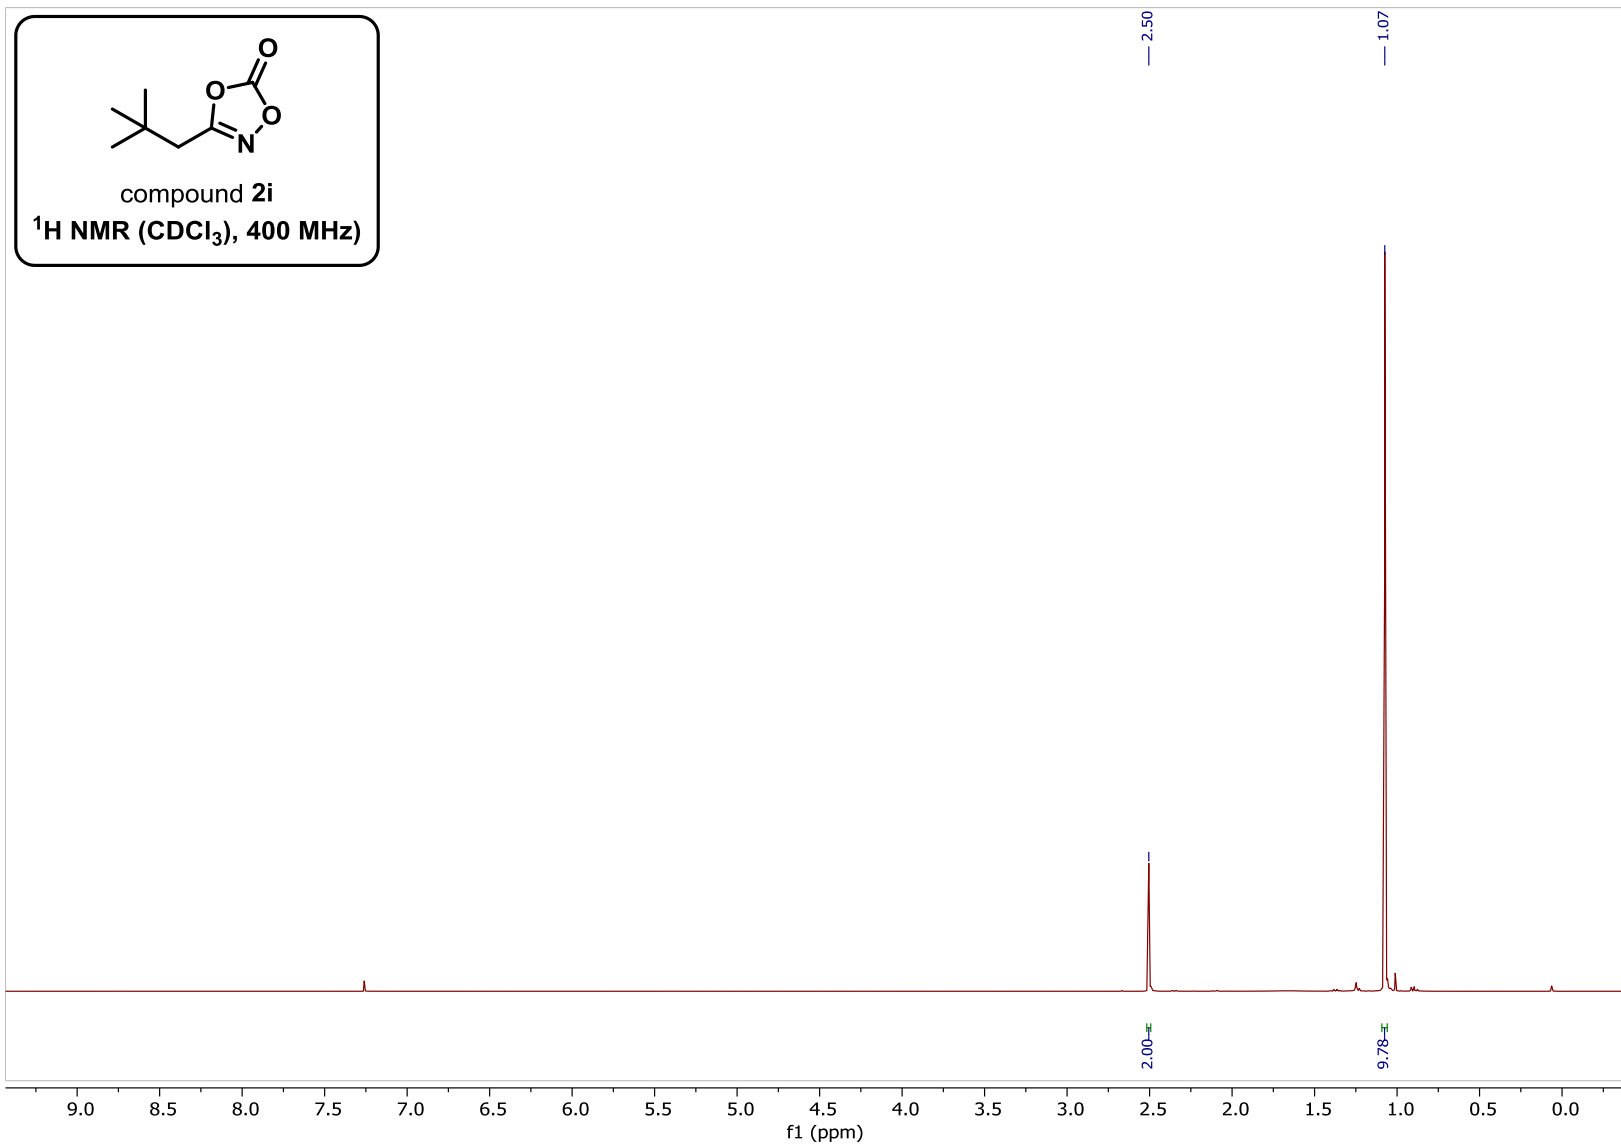

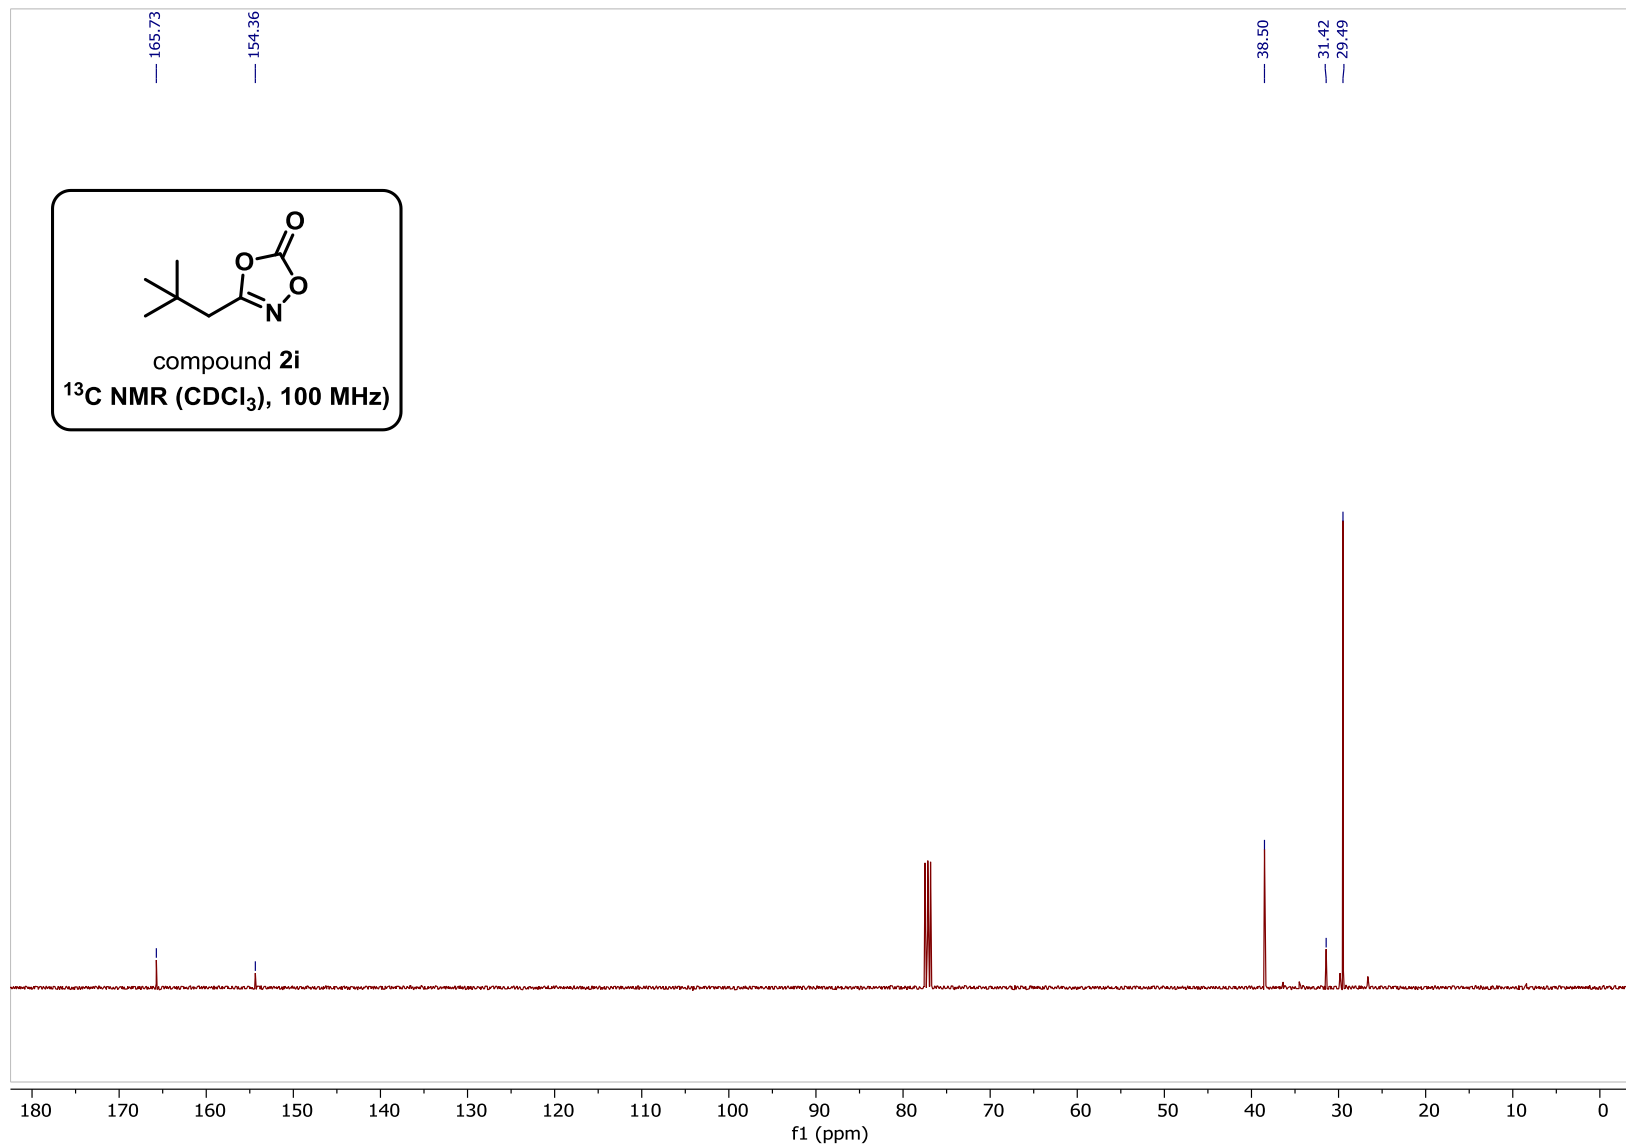

3.6. Compound 2j

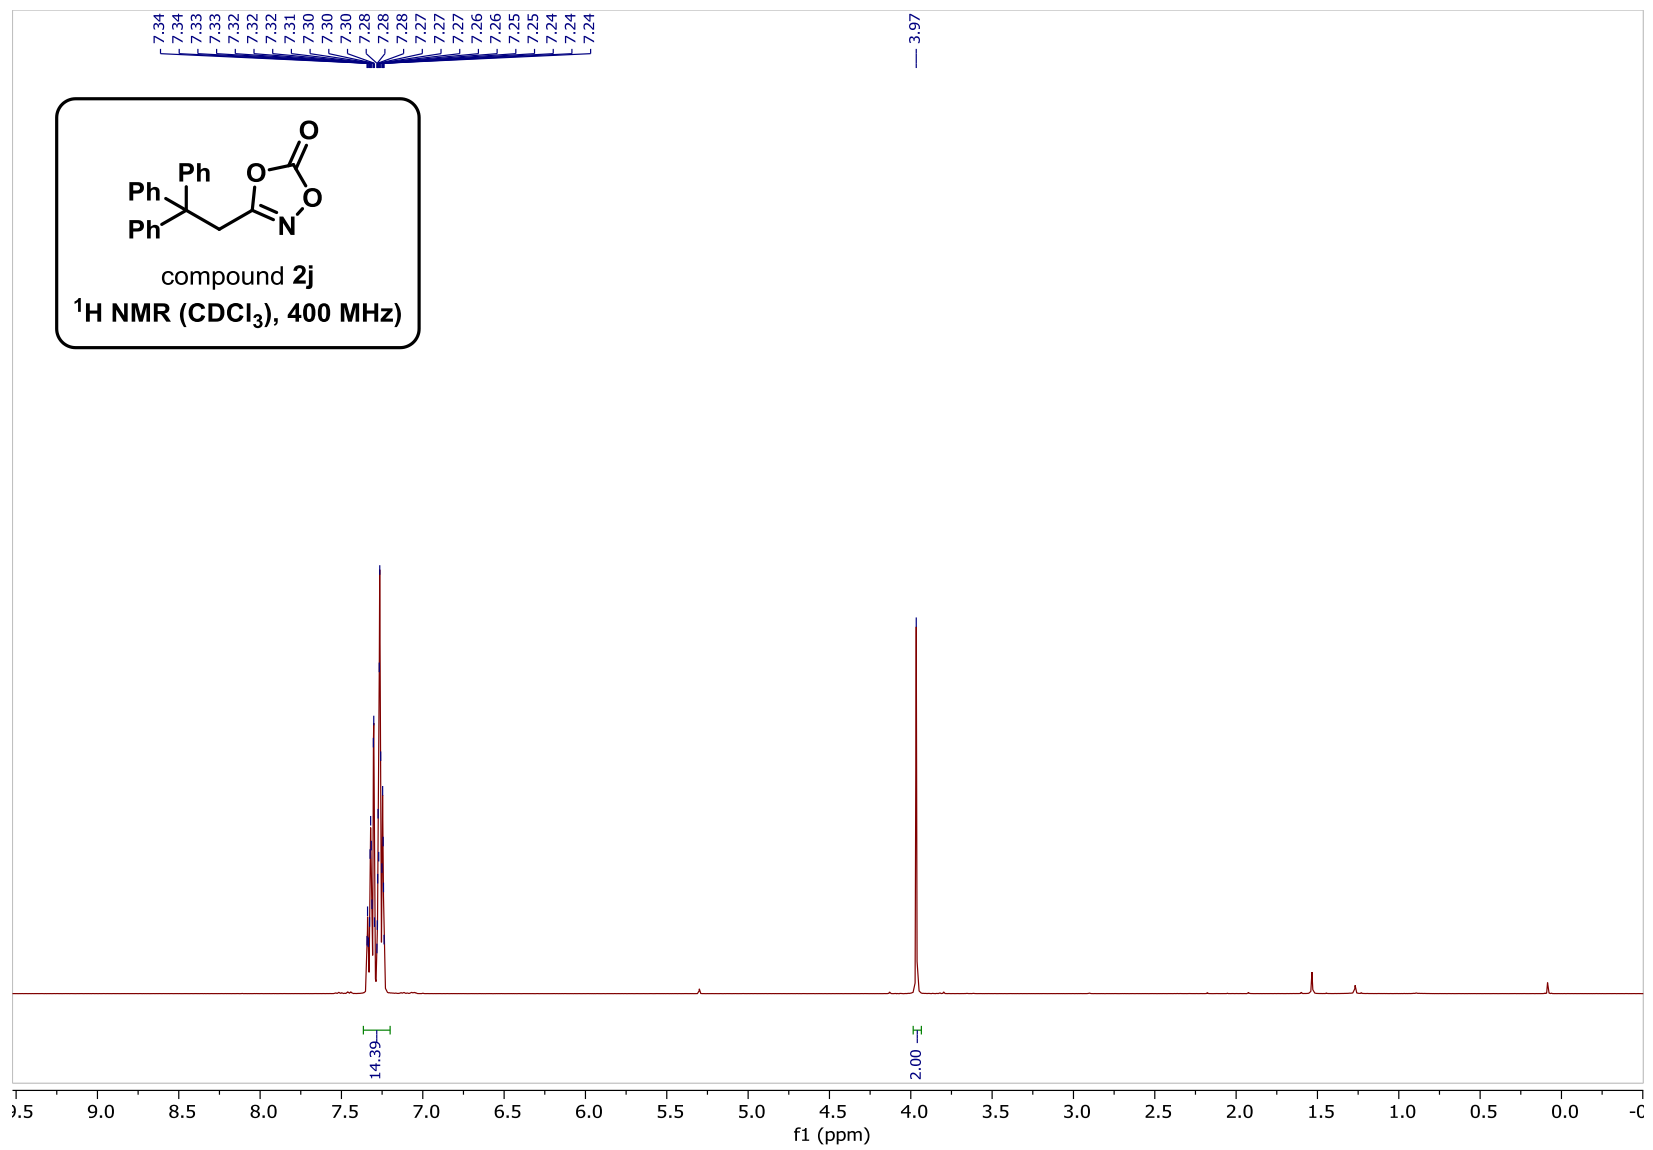

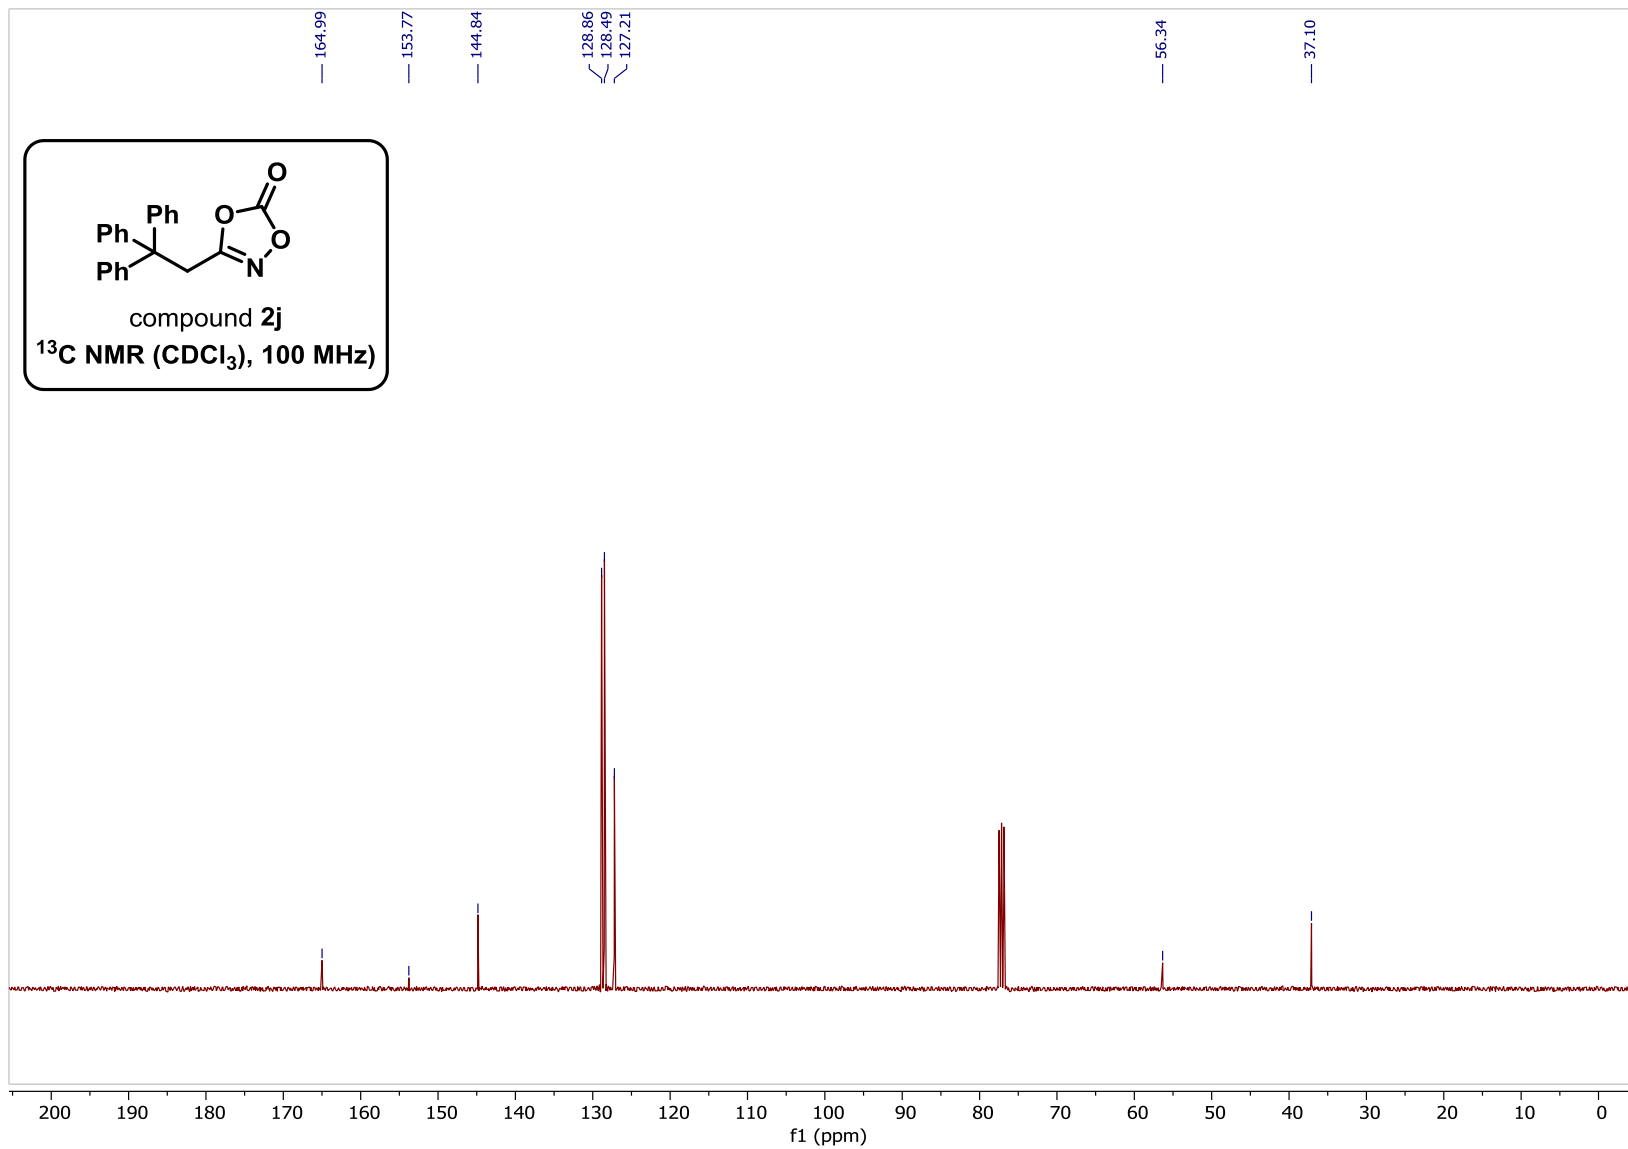

3.7. Compound 2k

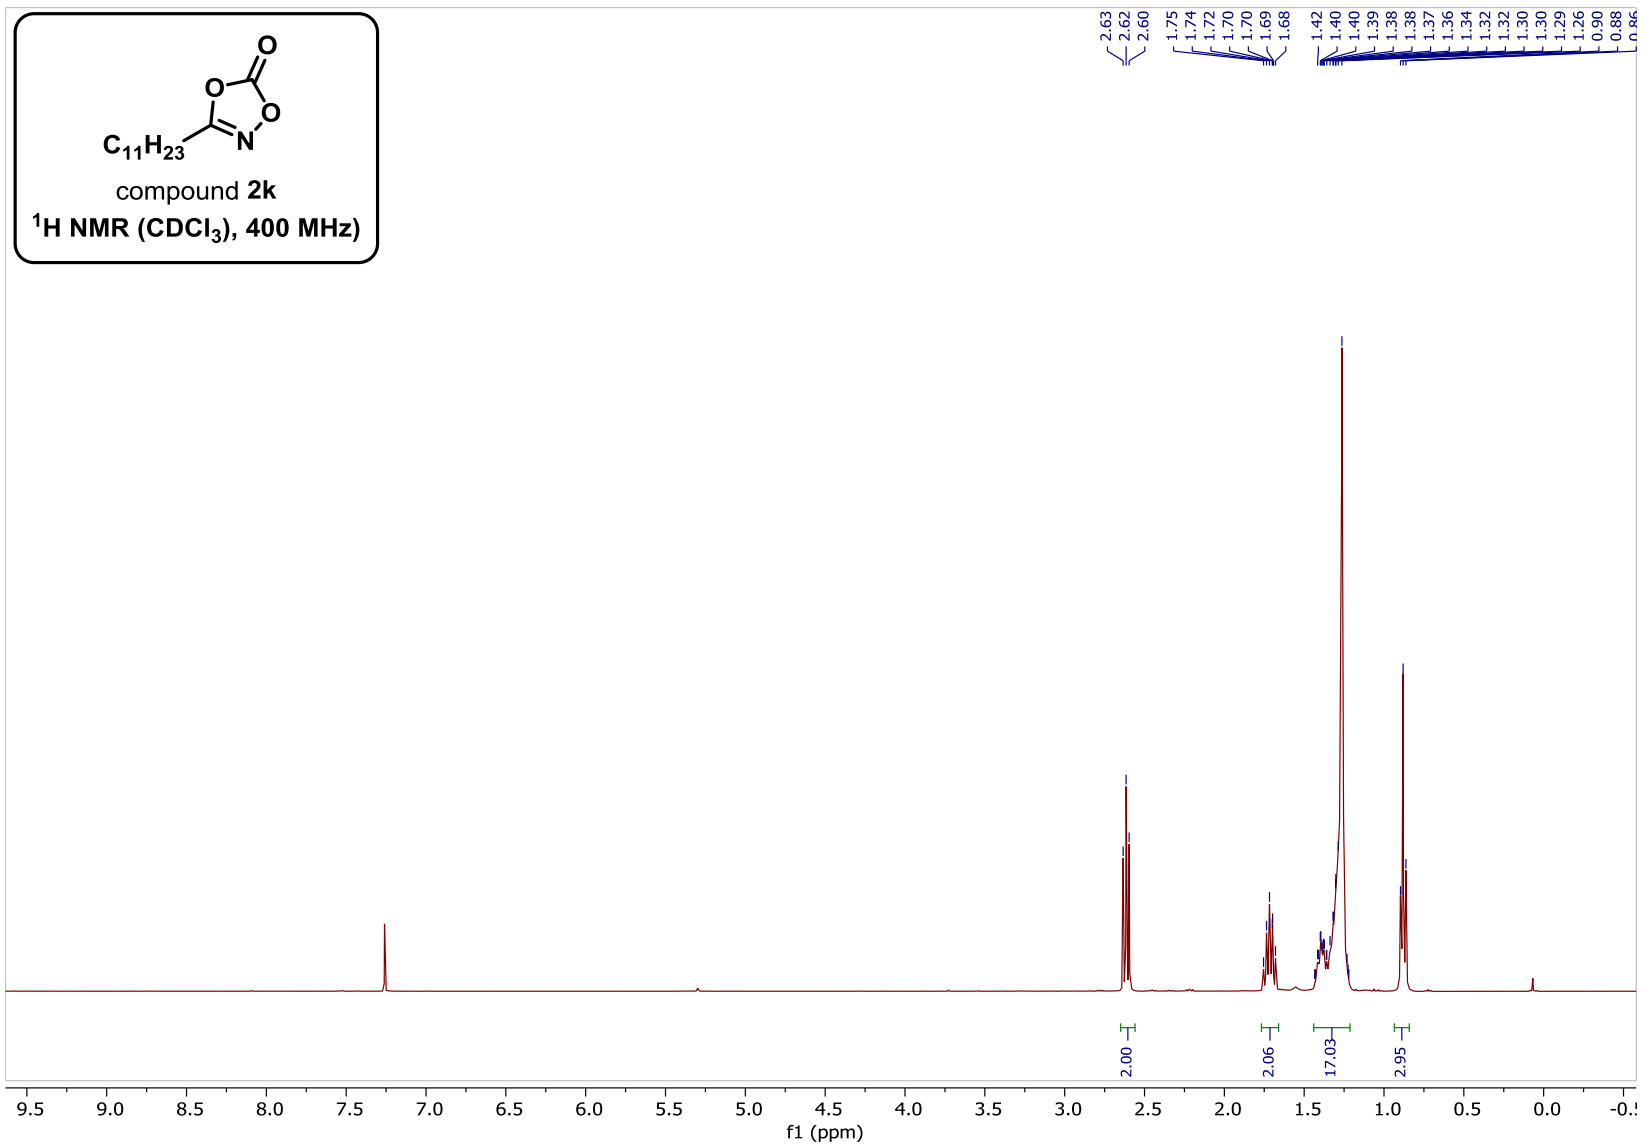

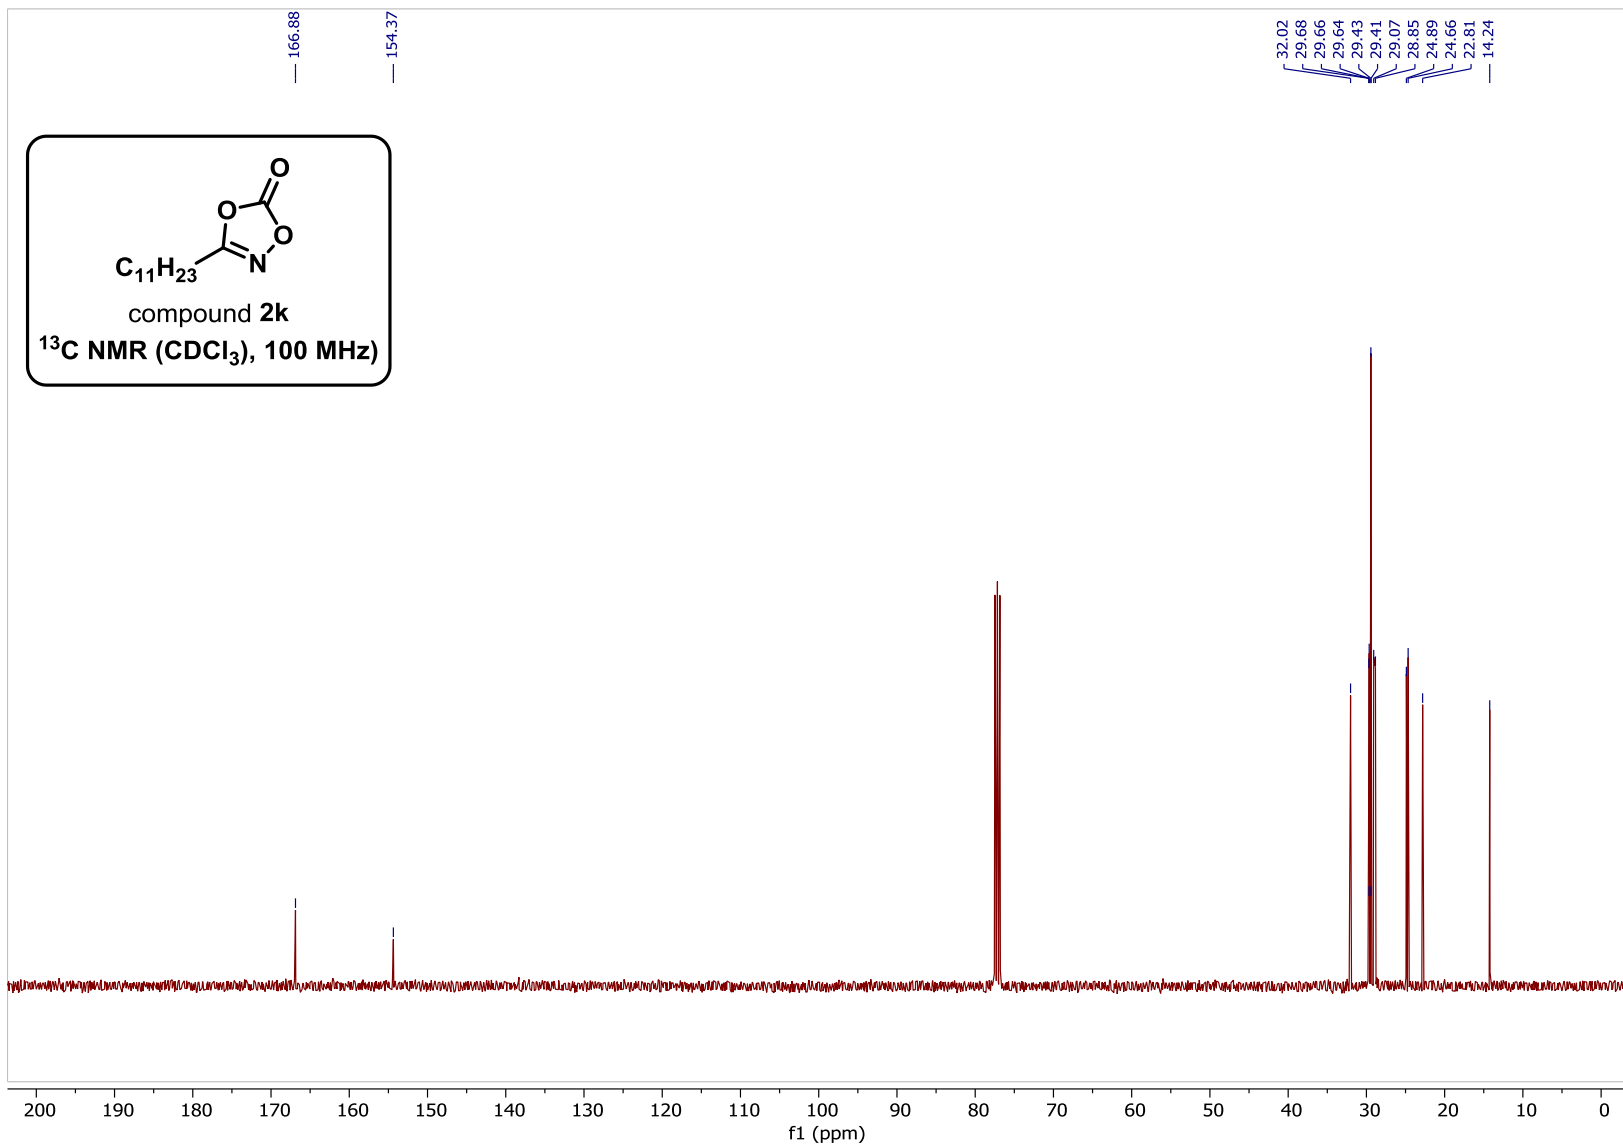

3.8. Compound 2I

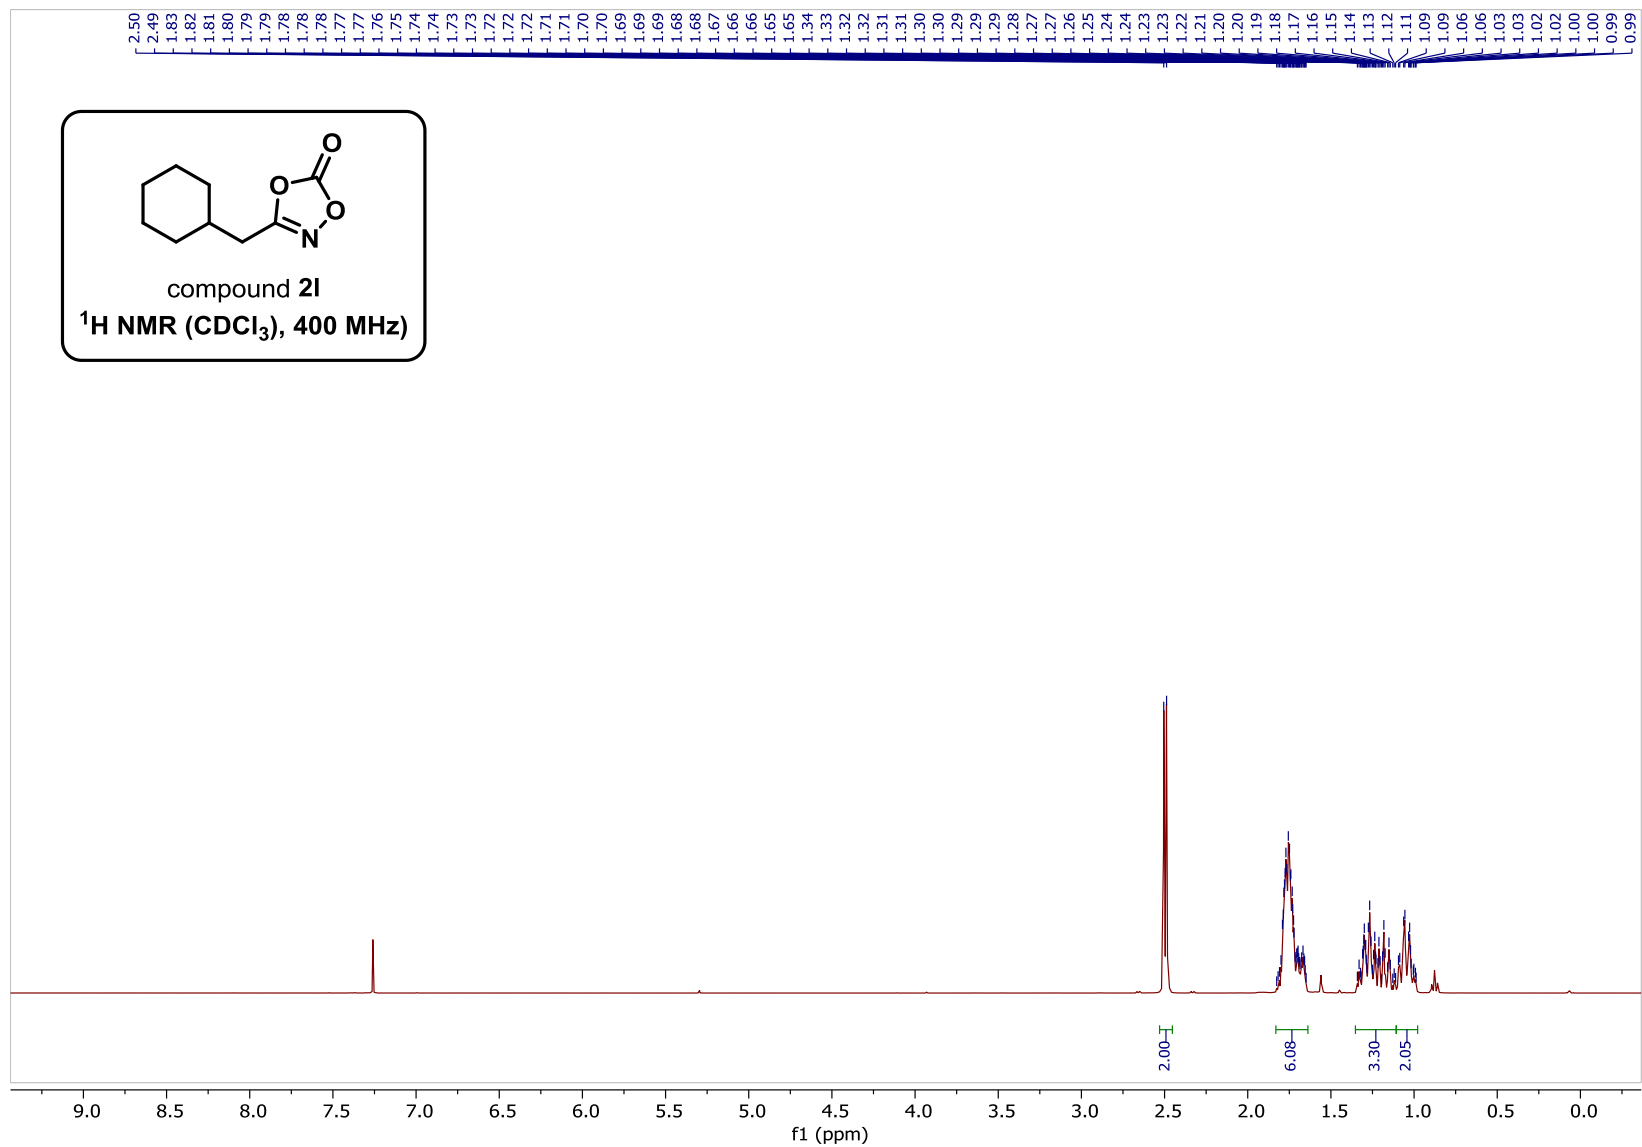



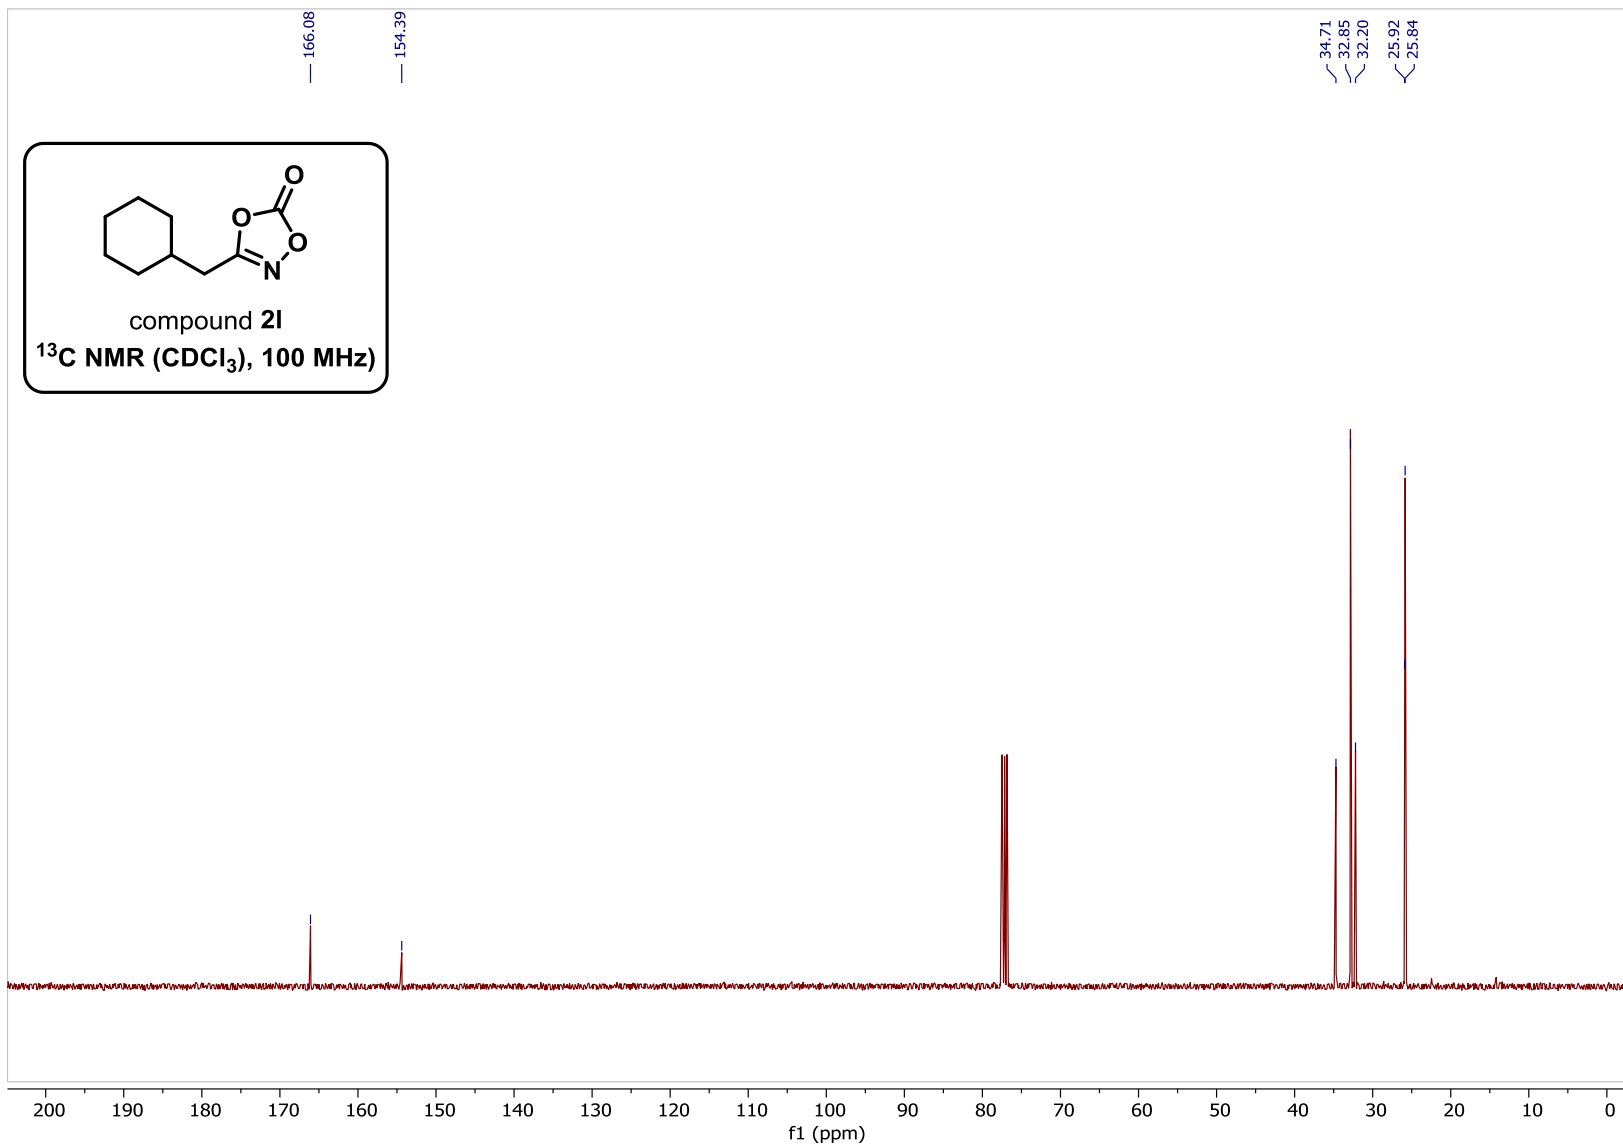

3.9. Compound 2m

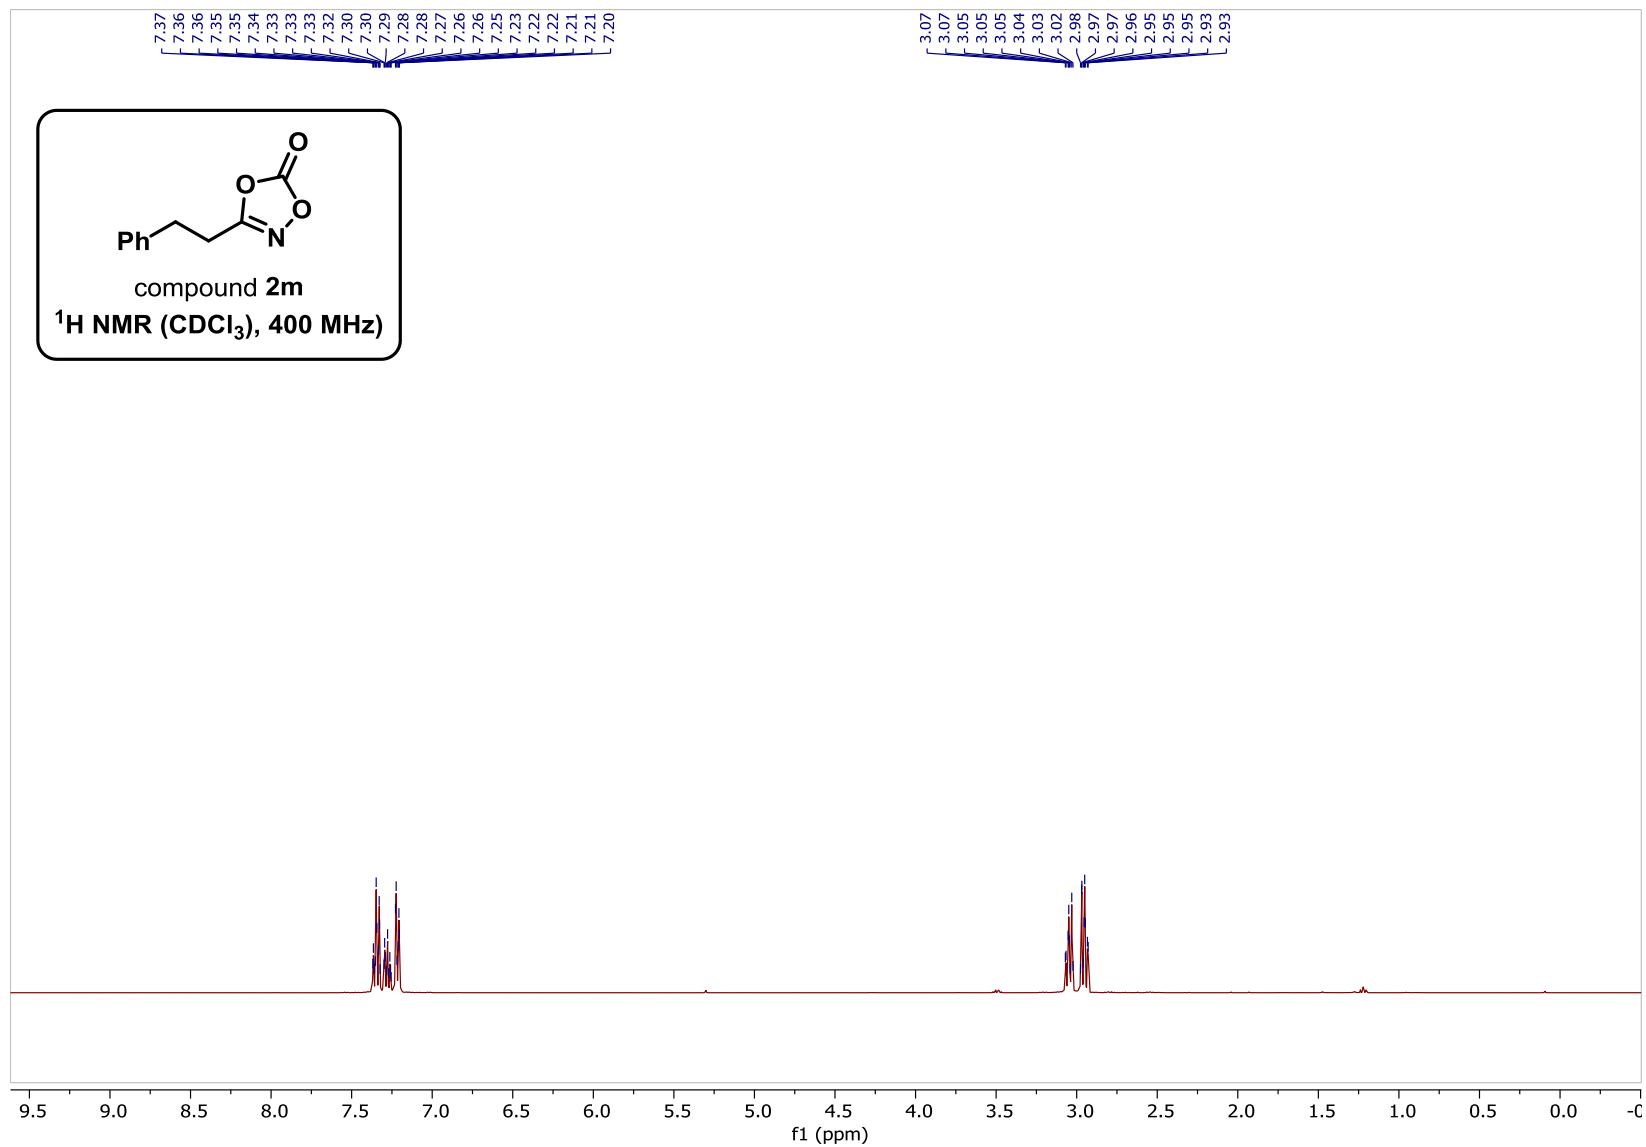

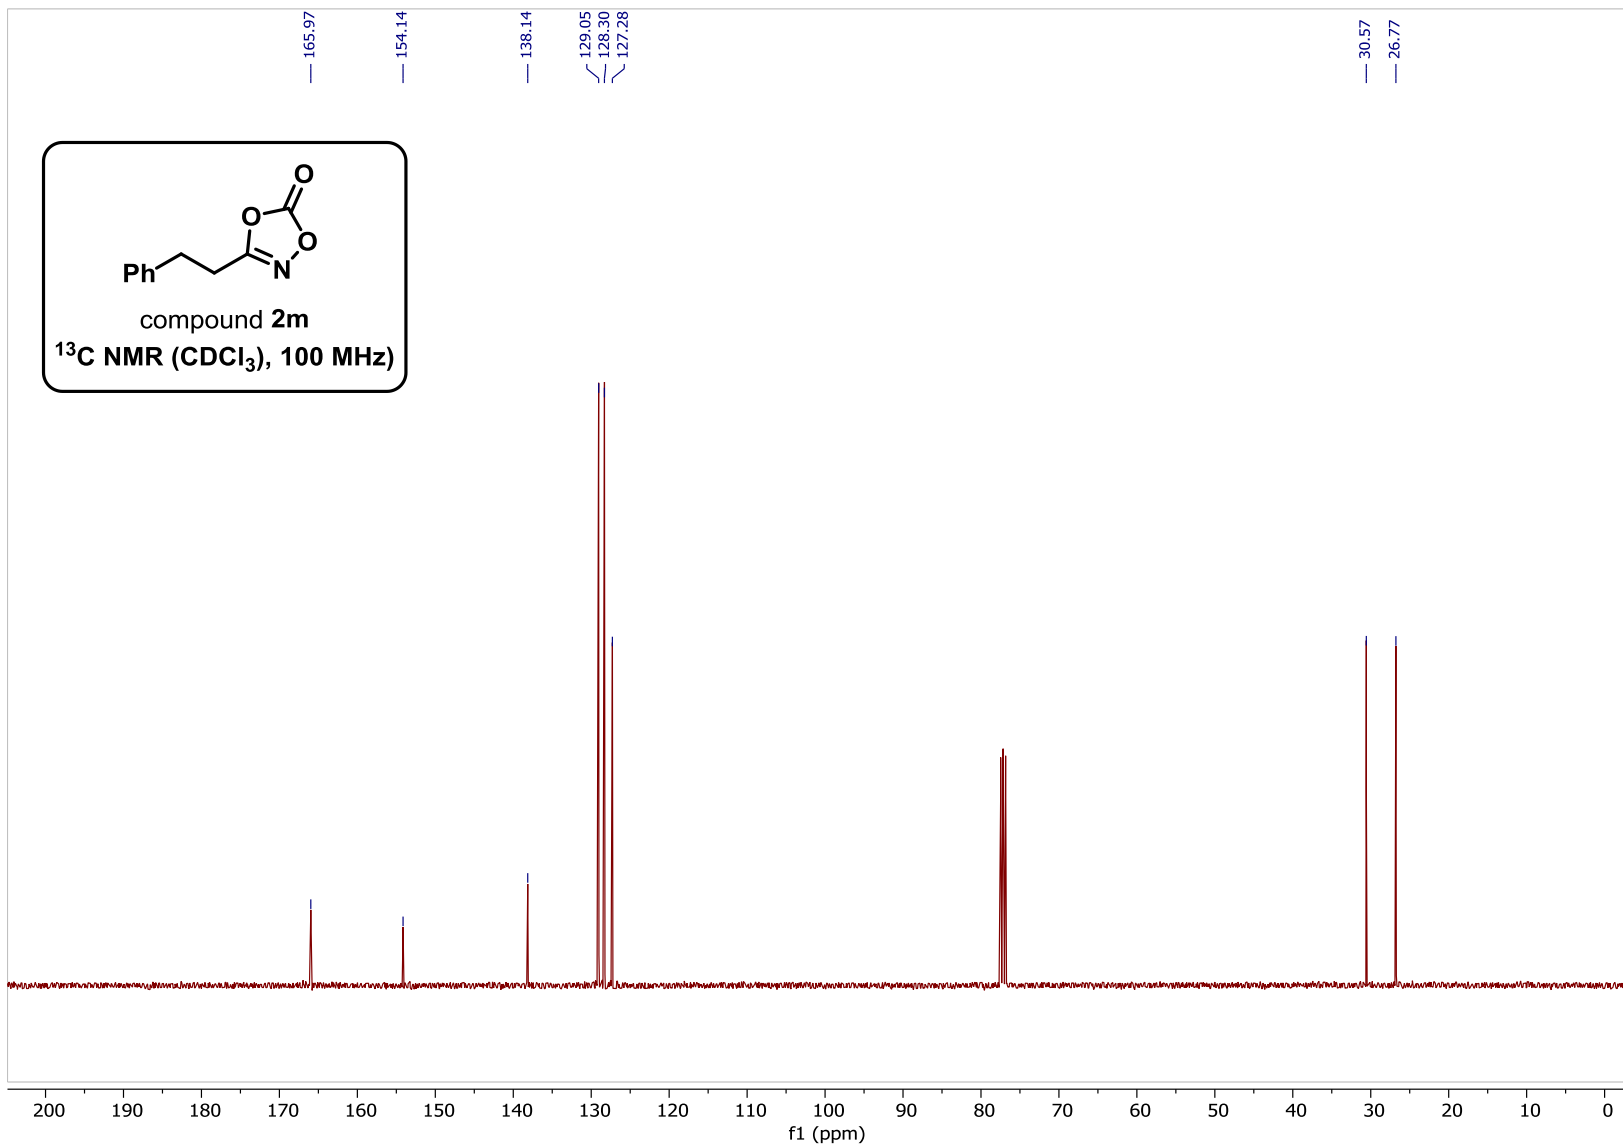

3.10. Compound 2n

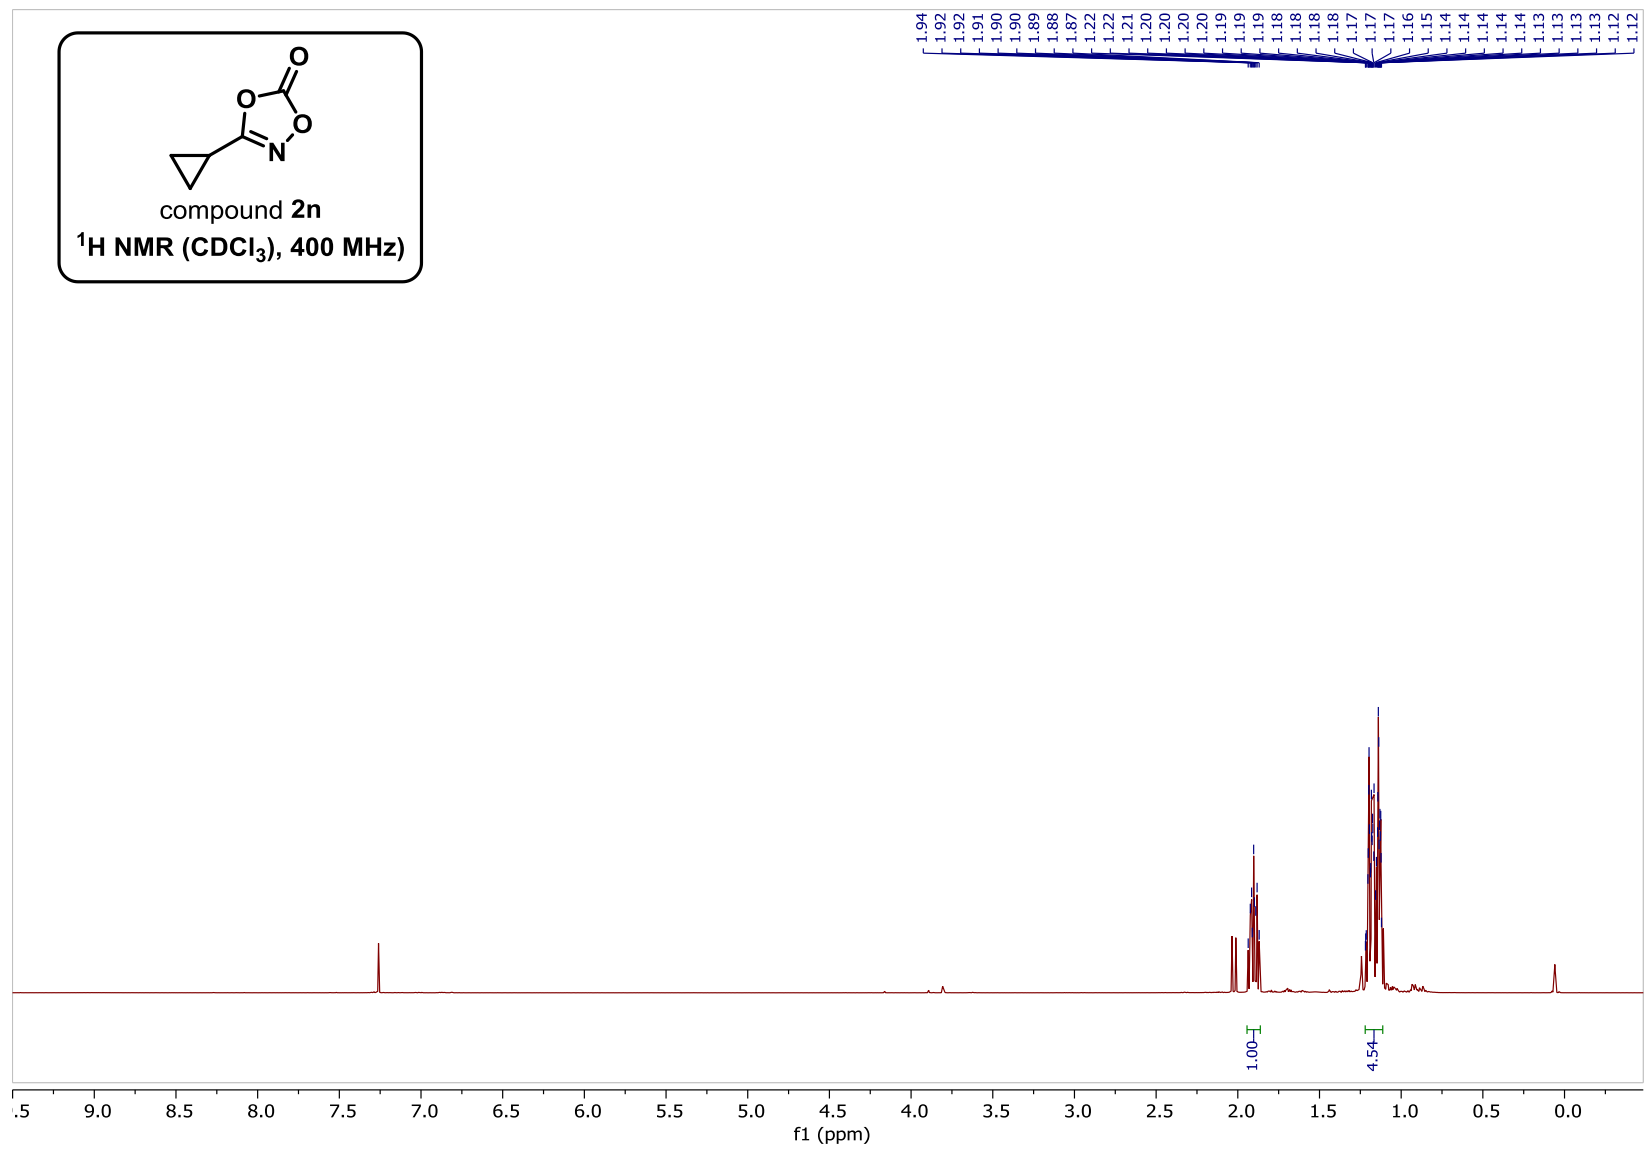

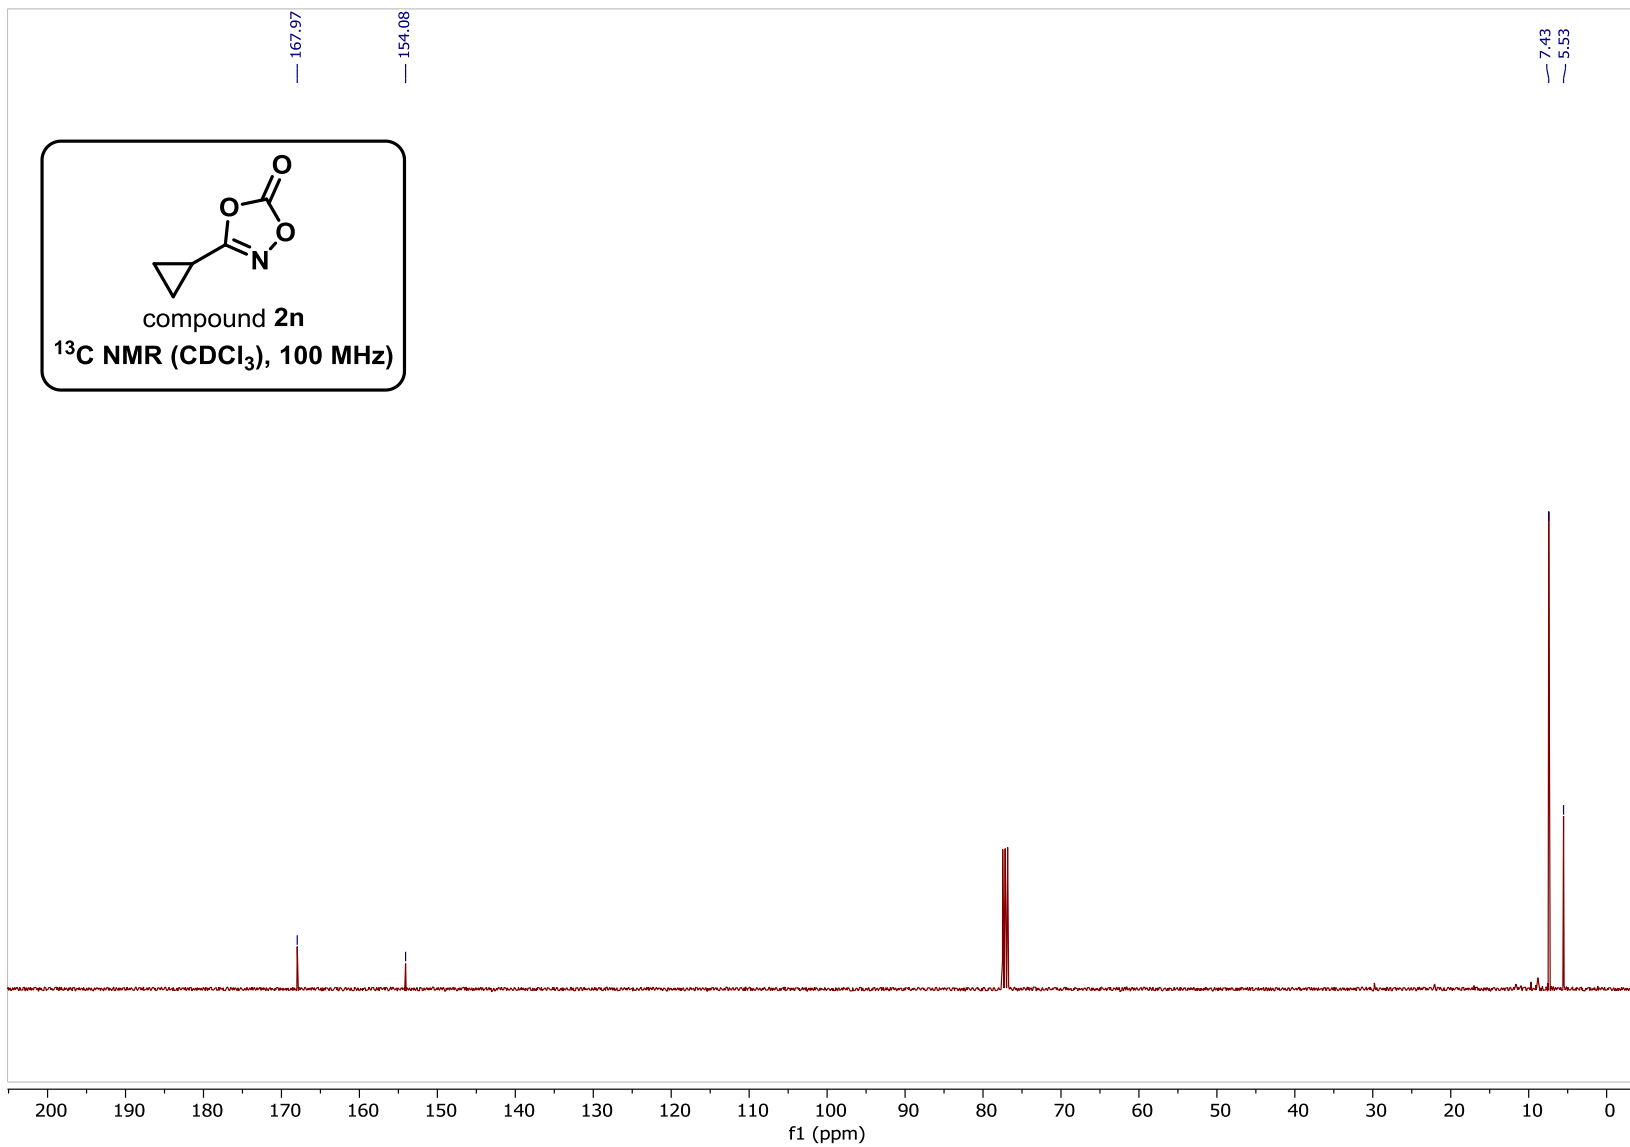

3.11. Compound 2o

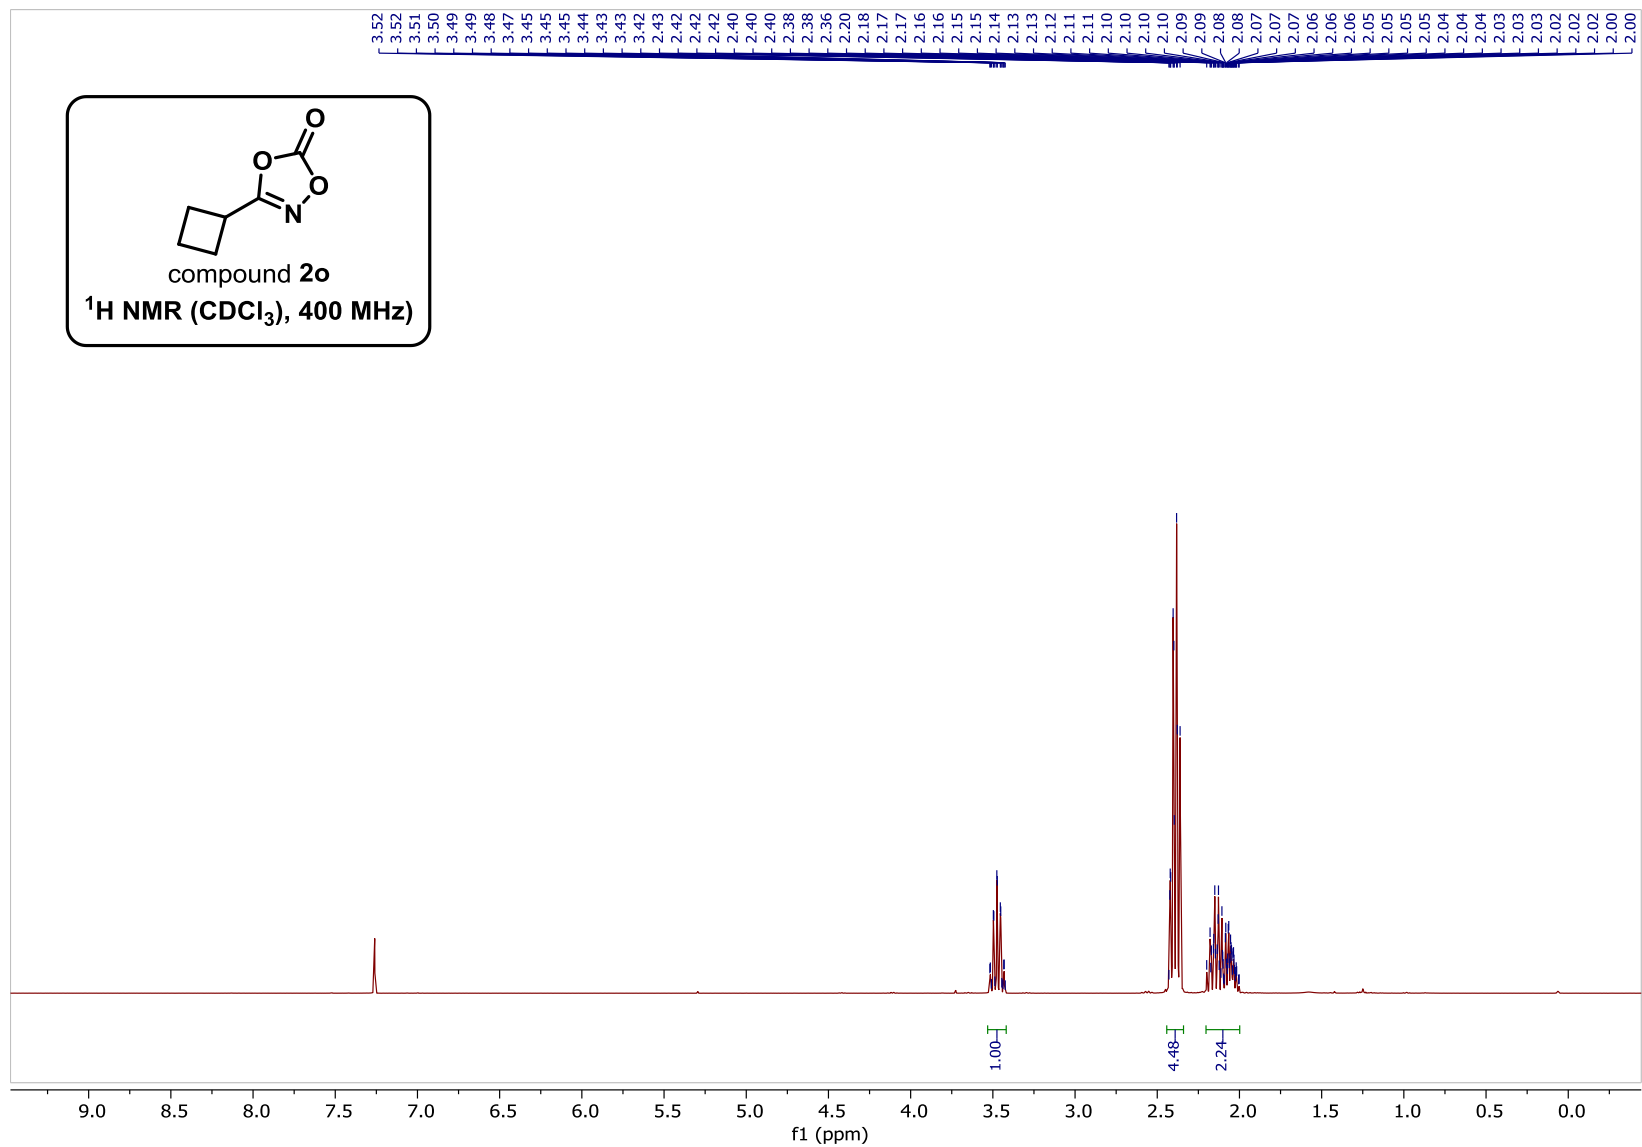

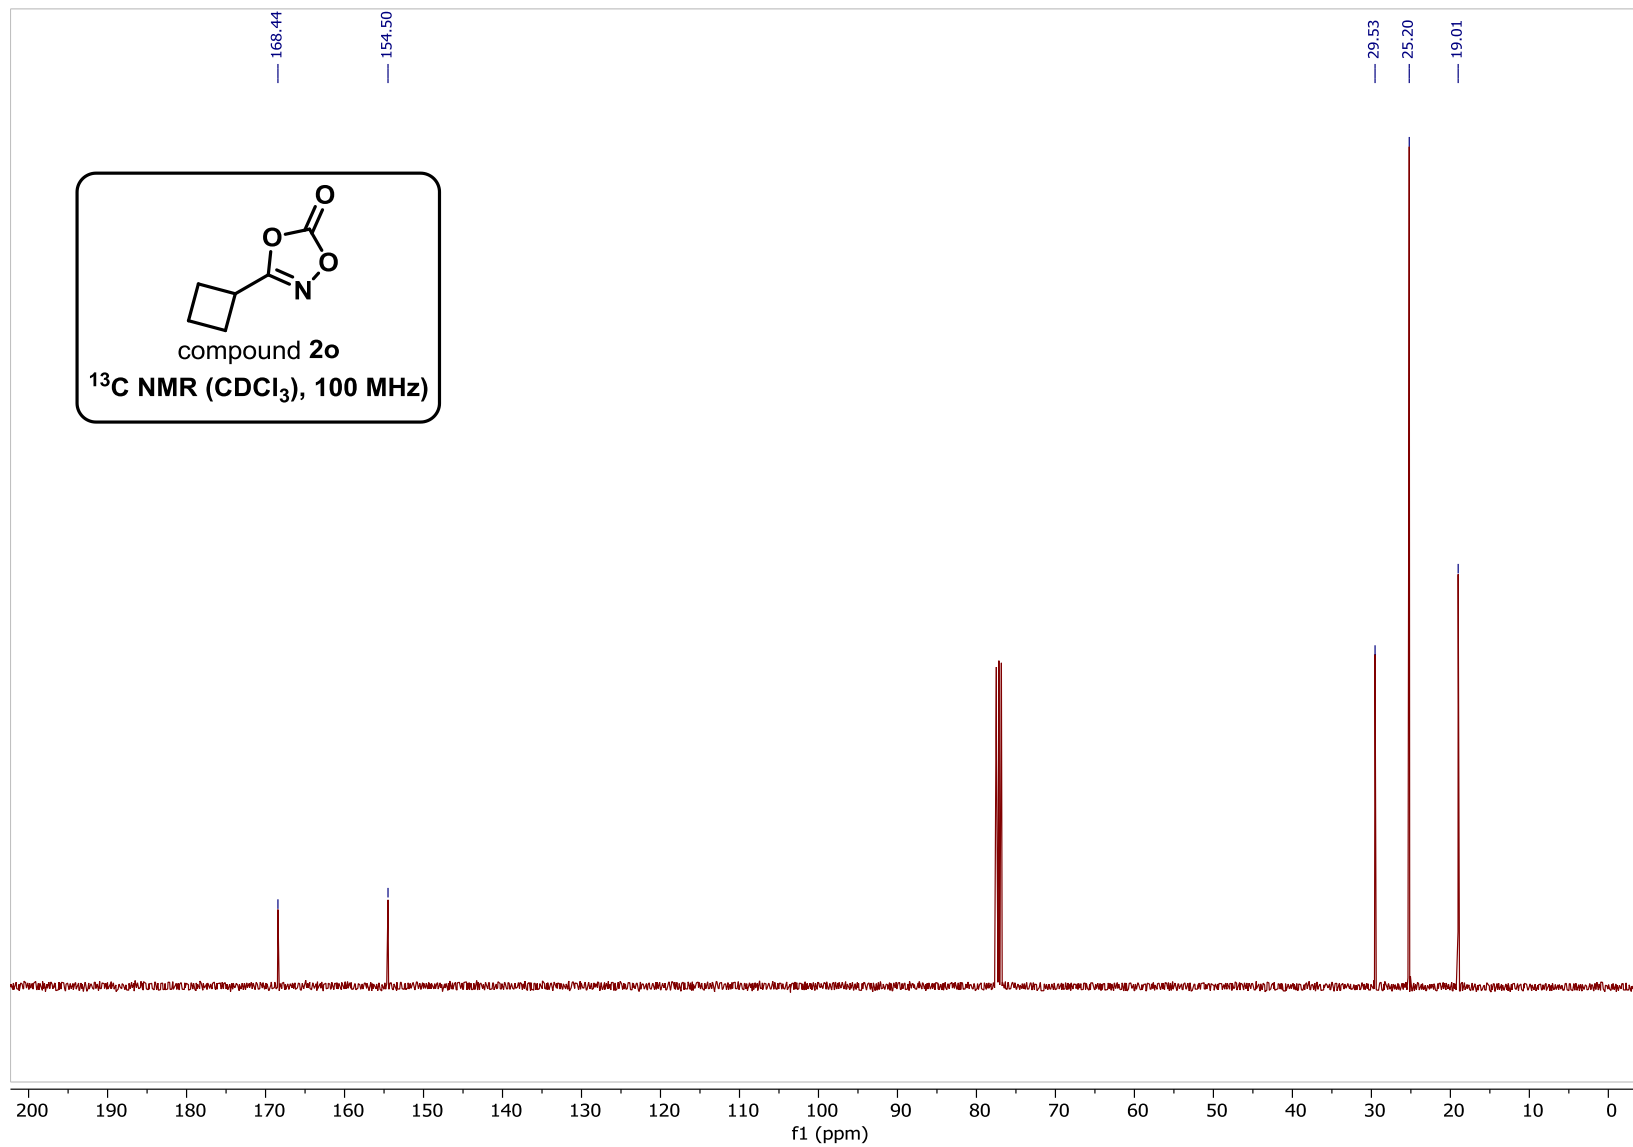

3.12. Compound 2b

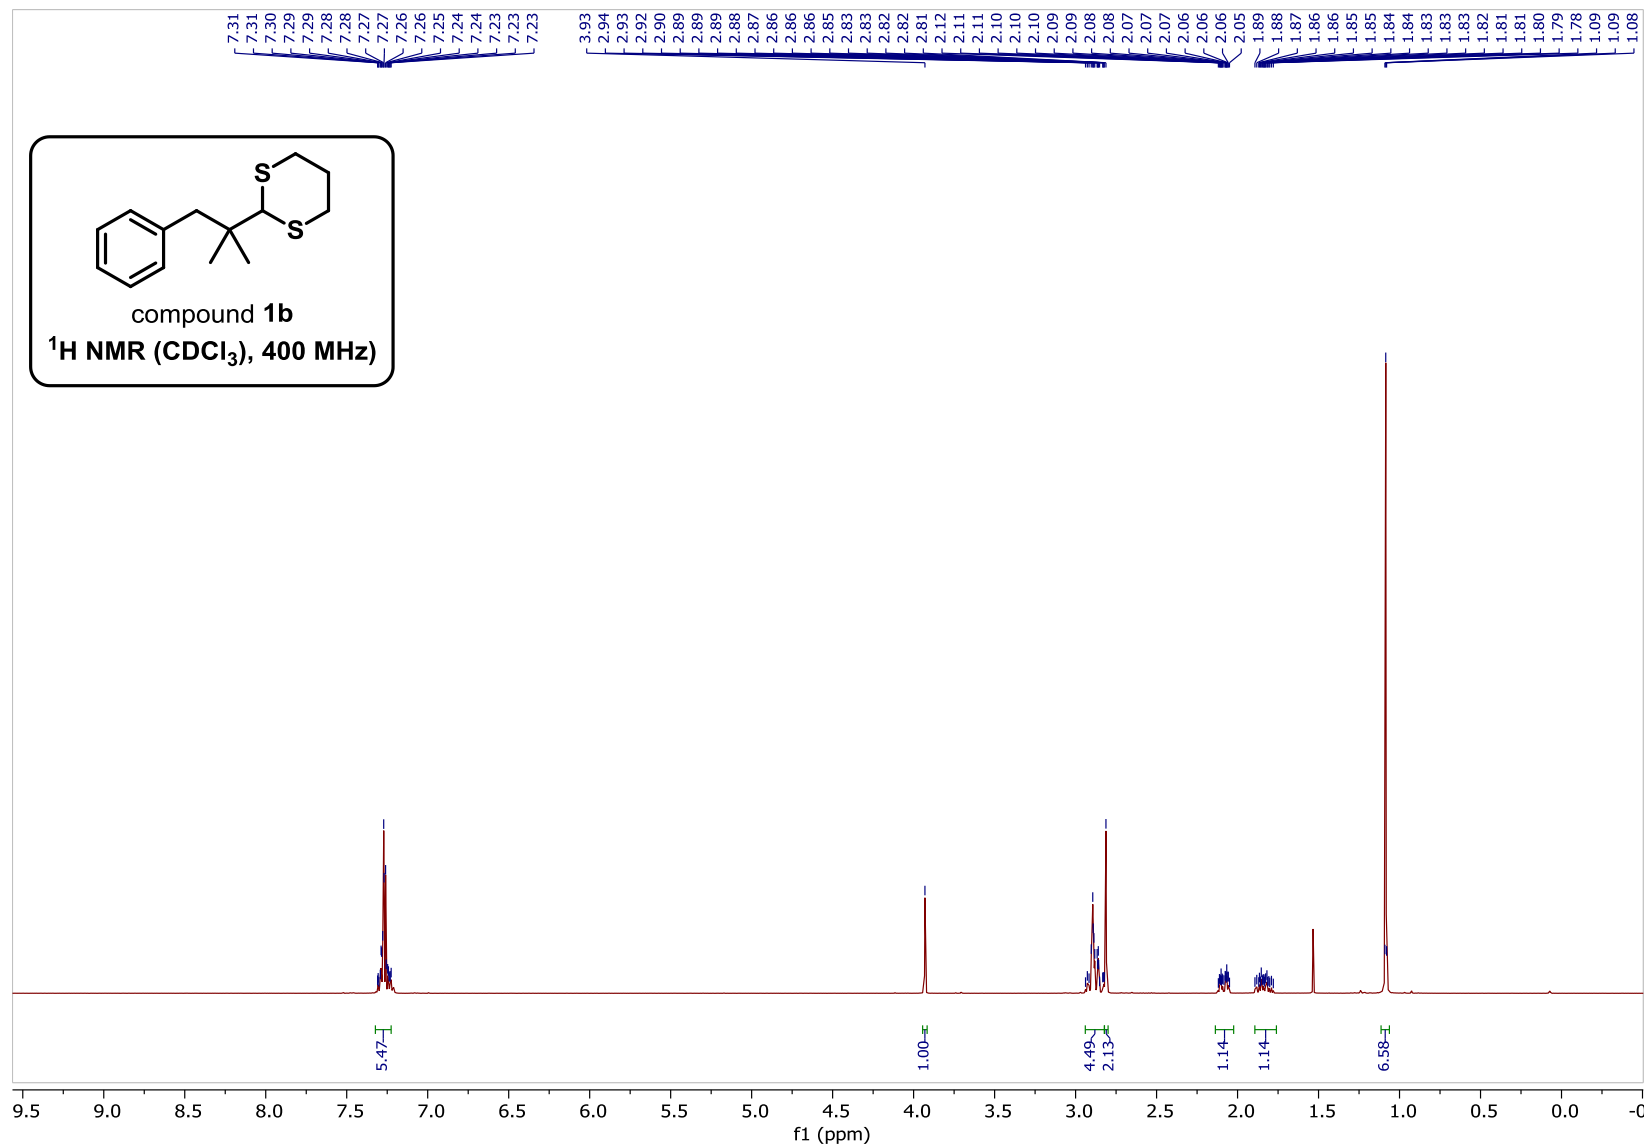



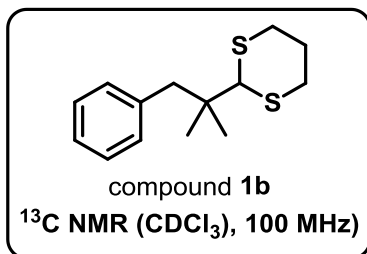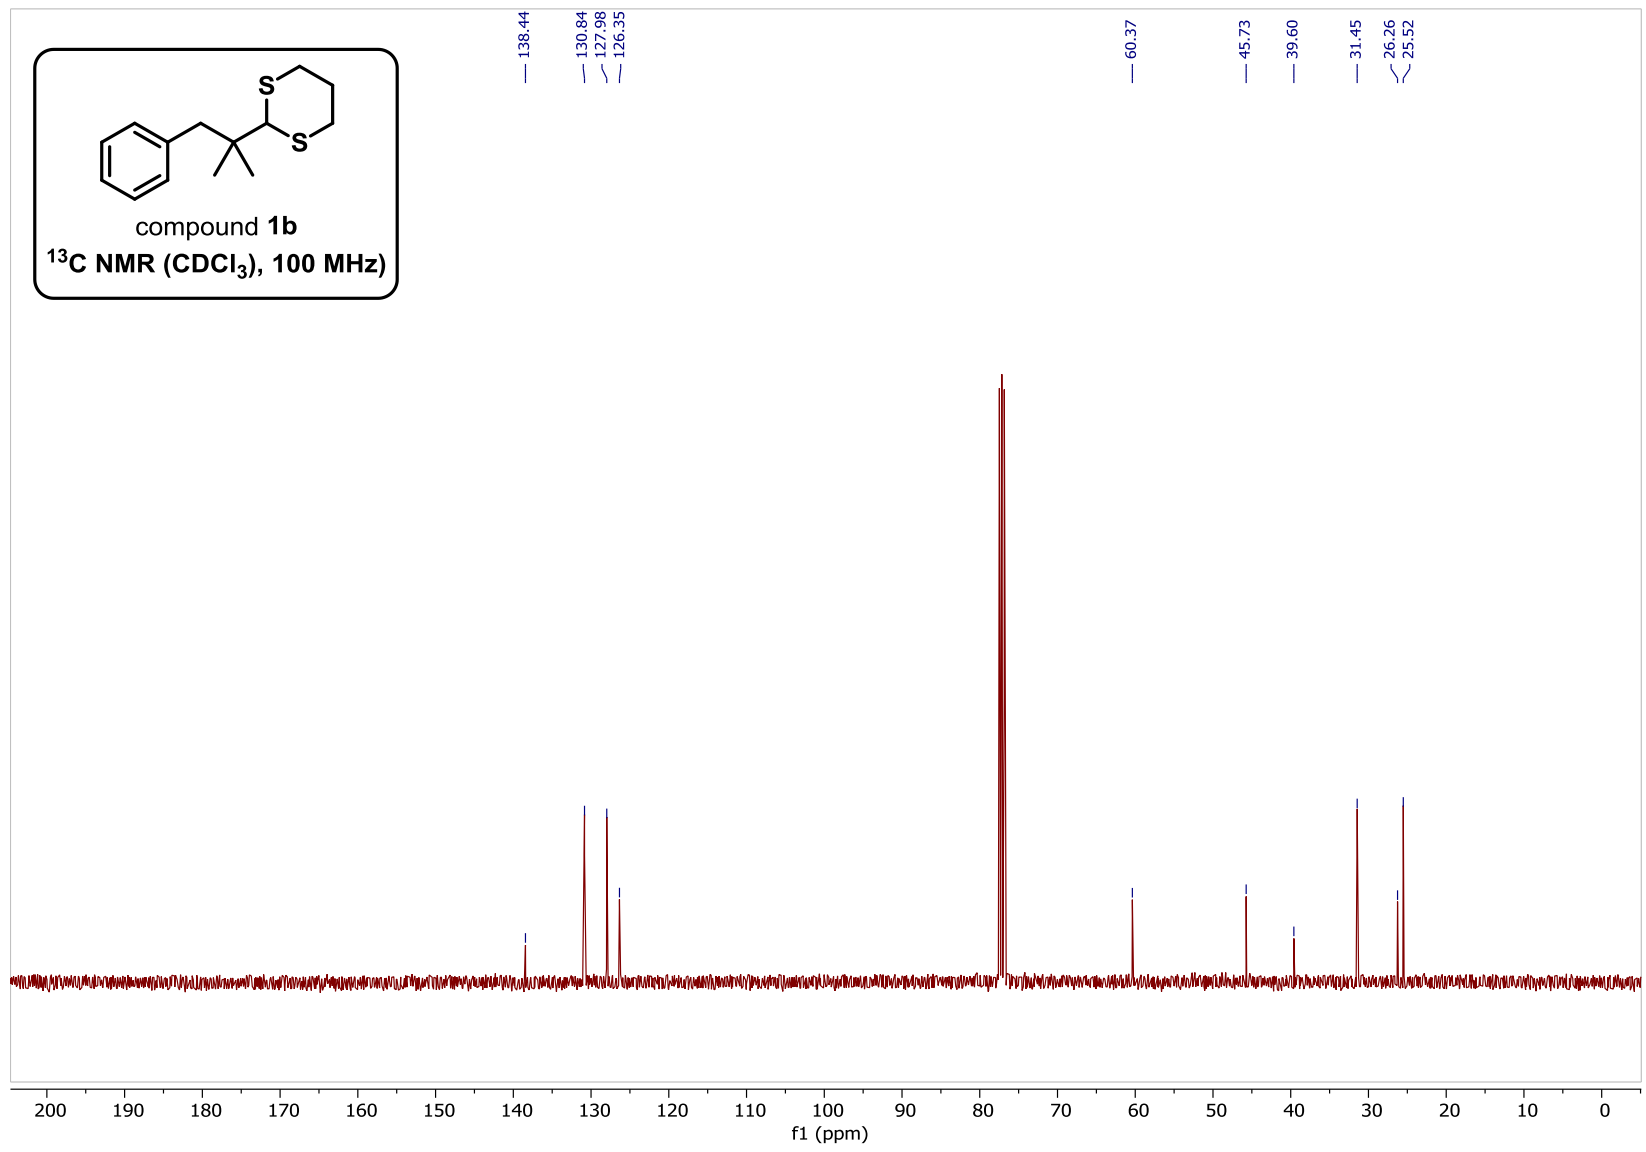

3.13. Compound 1c

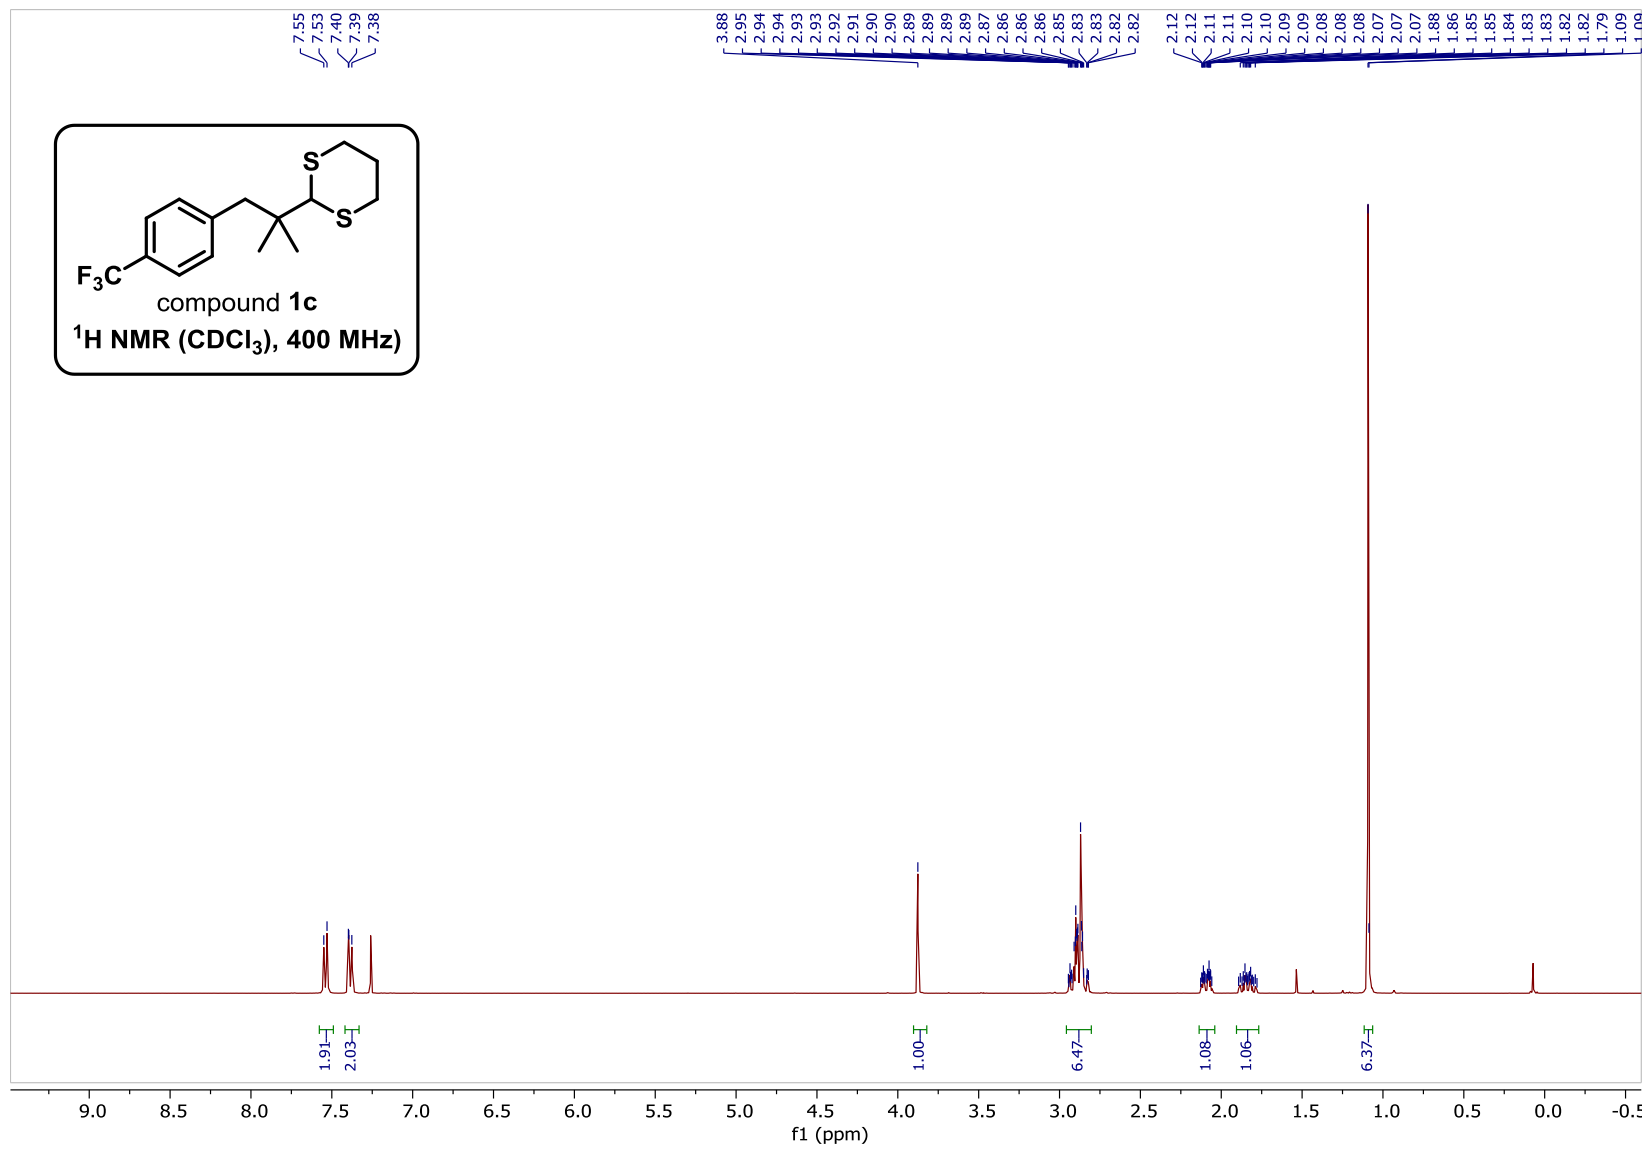

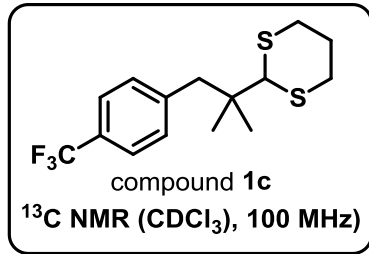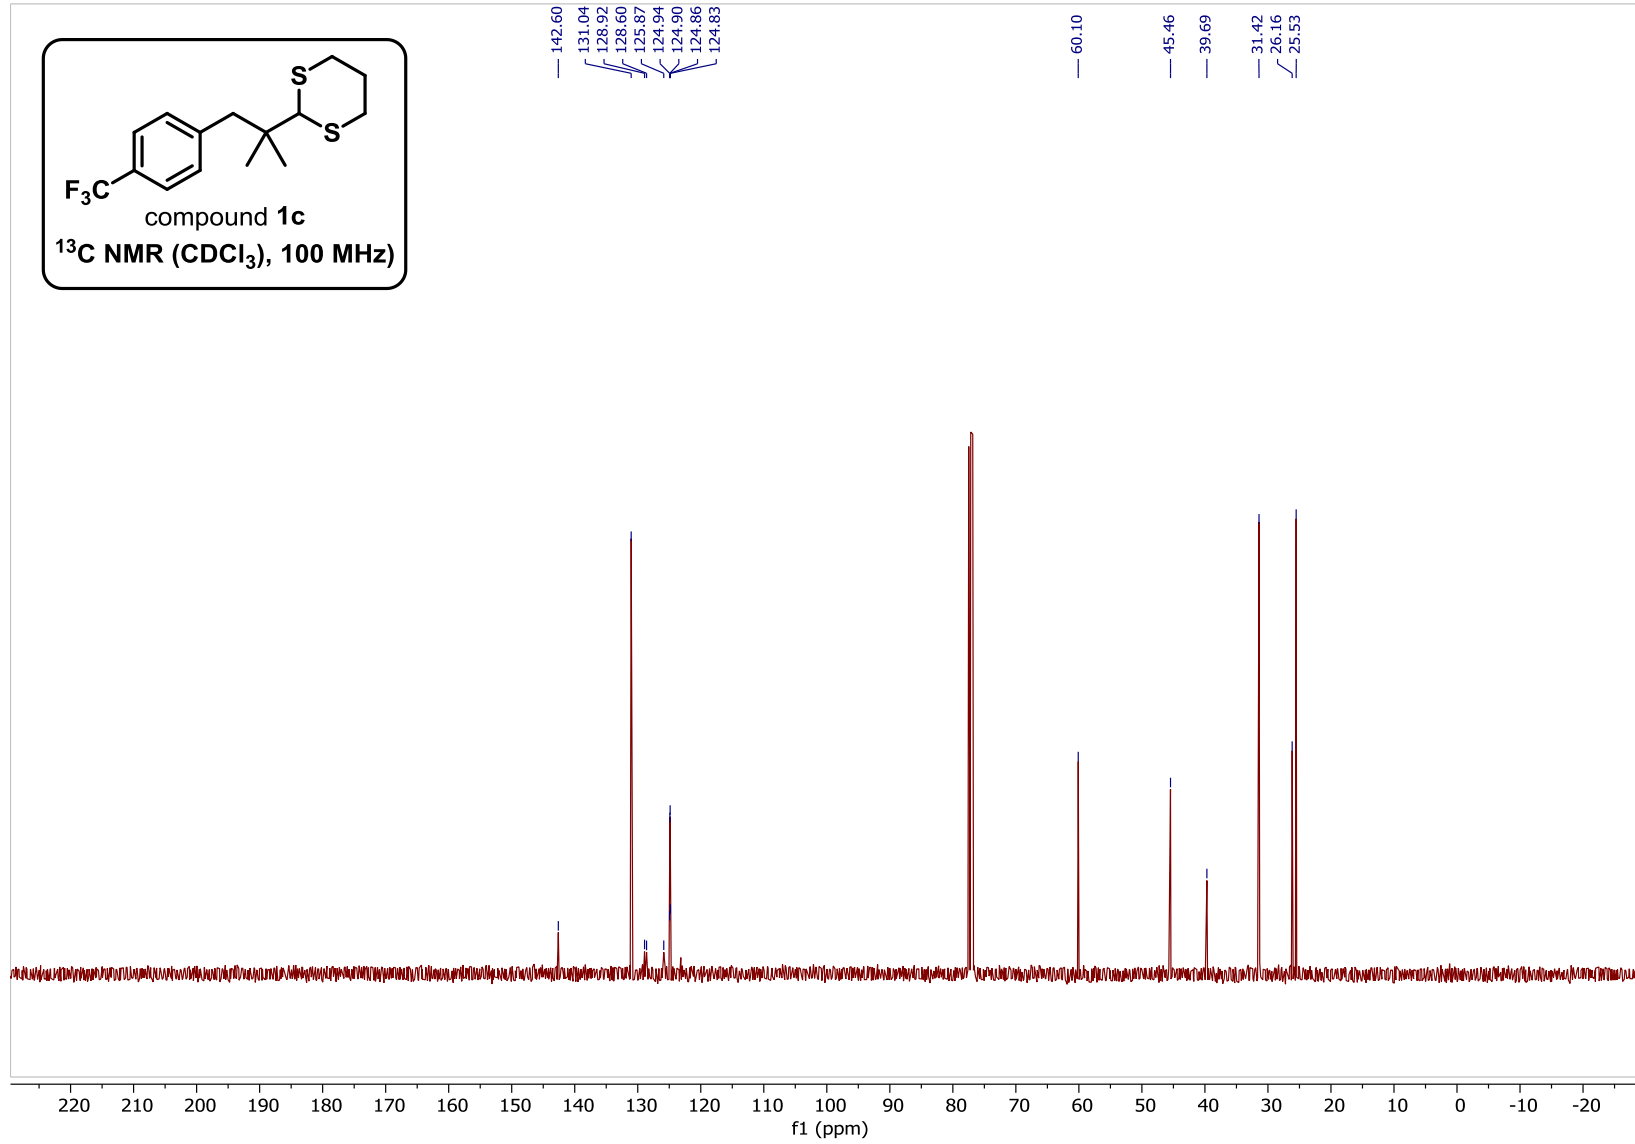

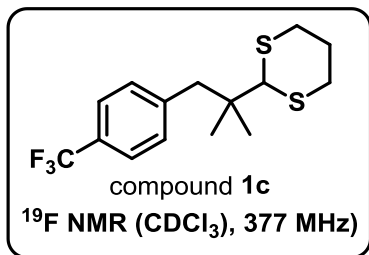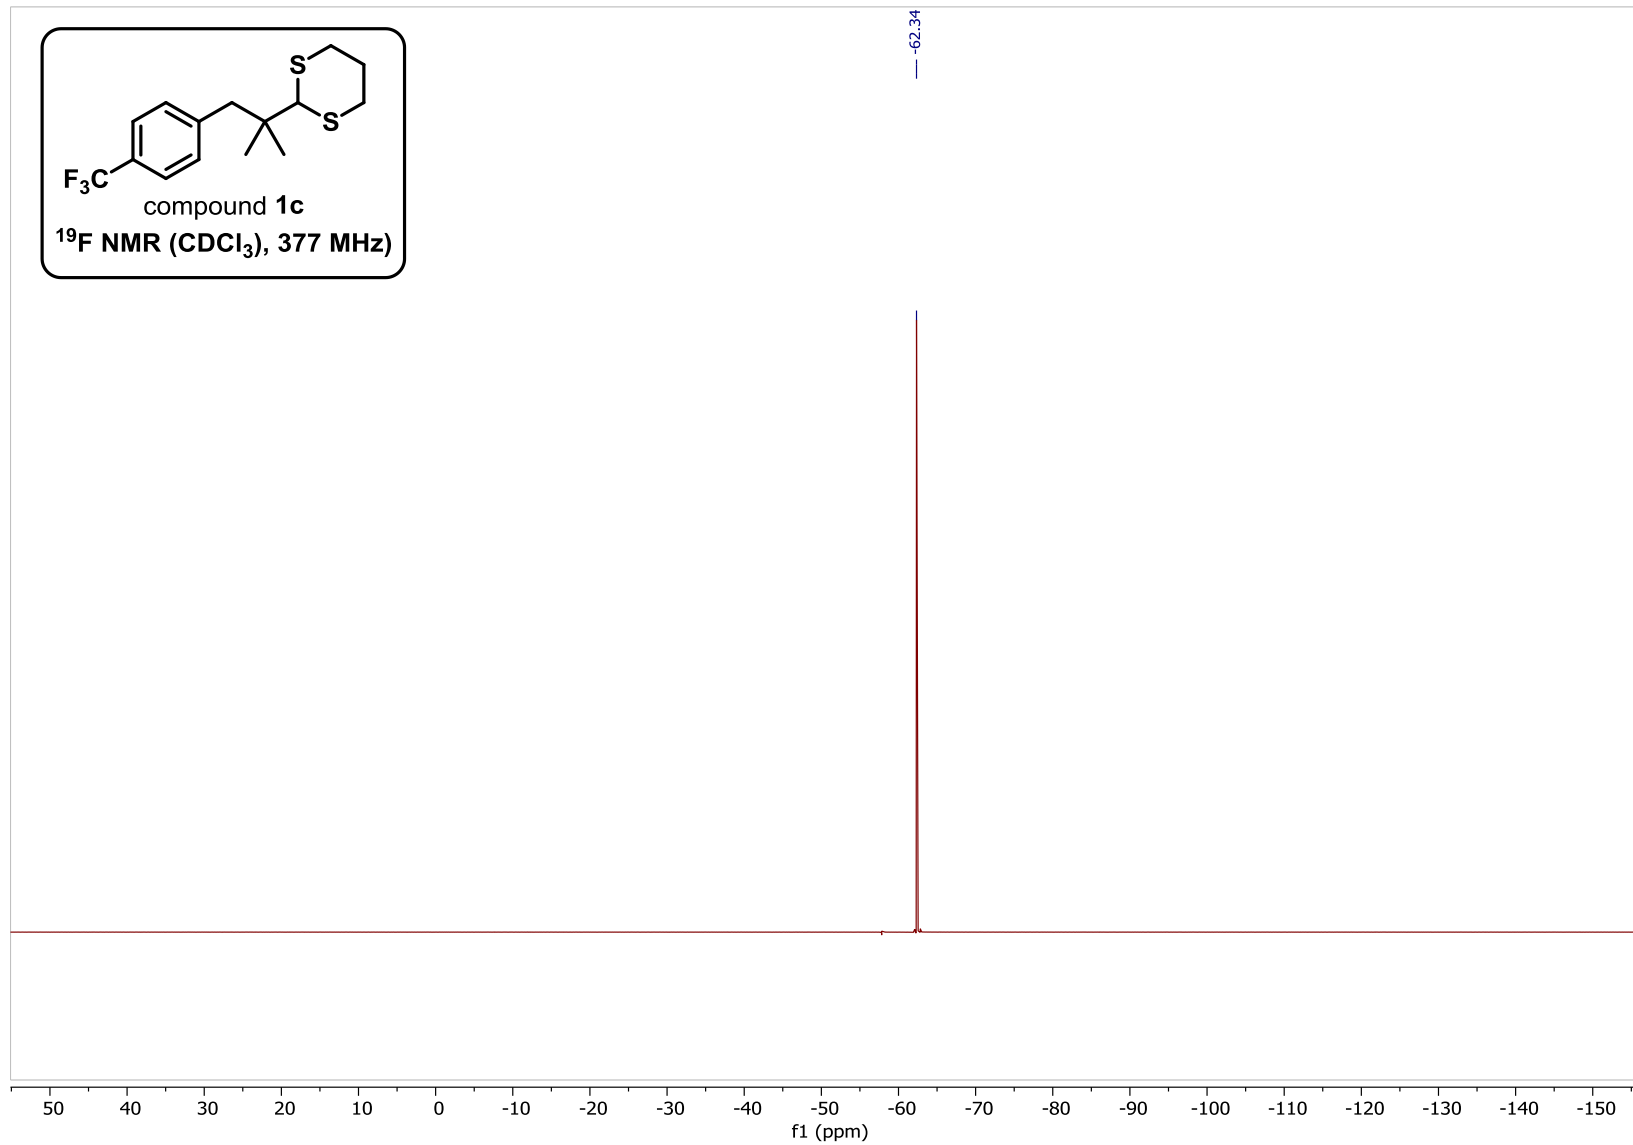

3.14. Compound 1d

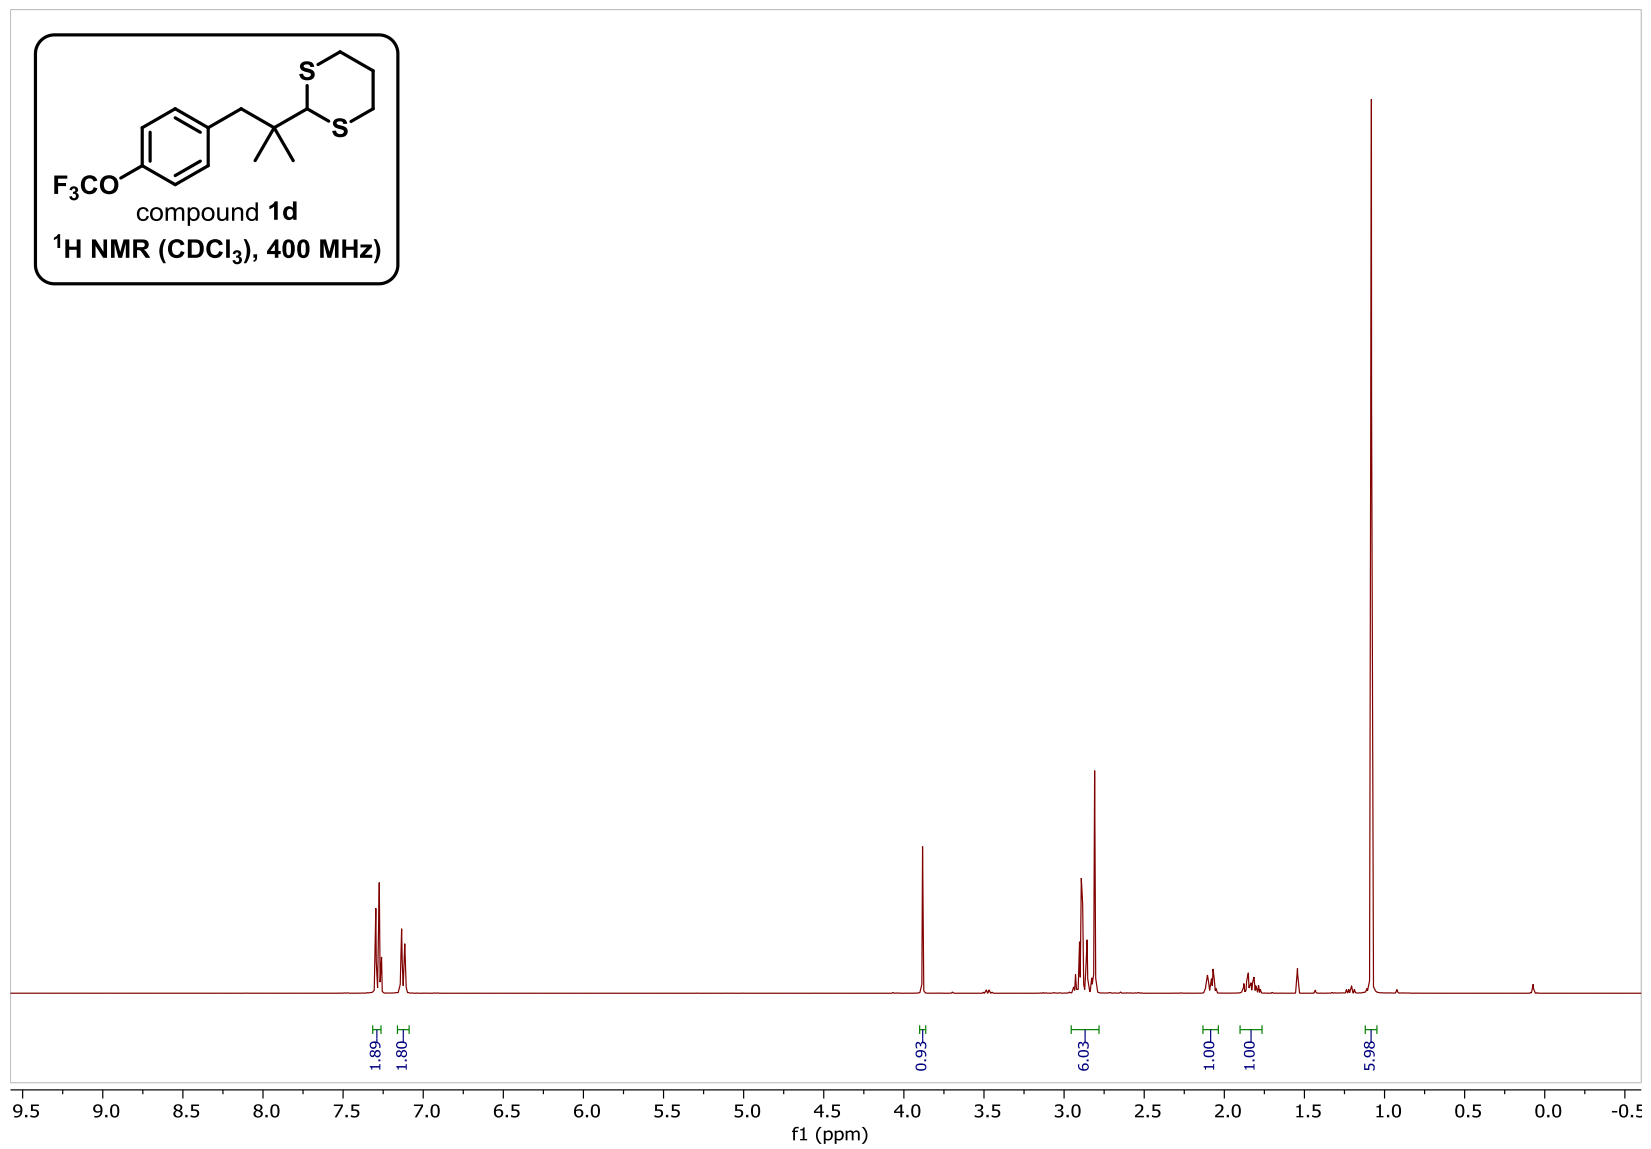

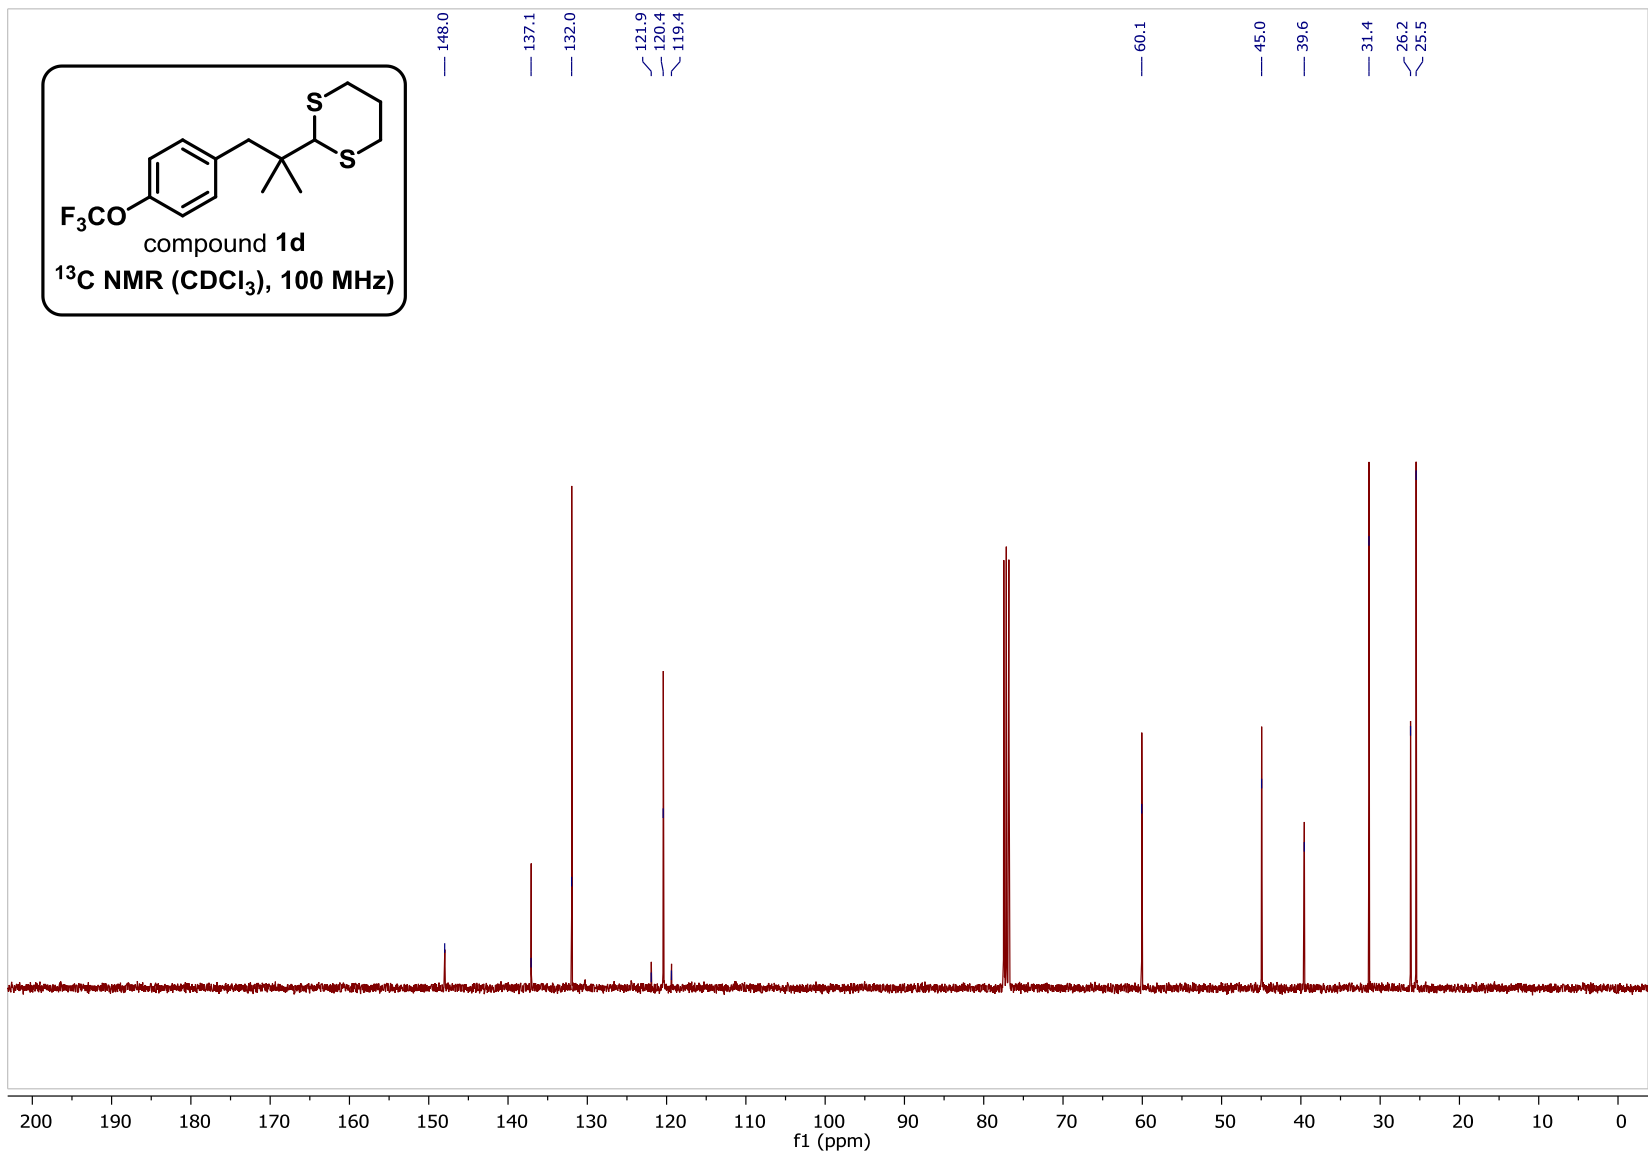

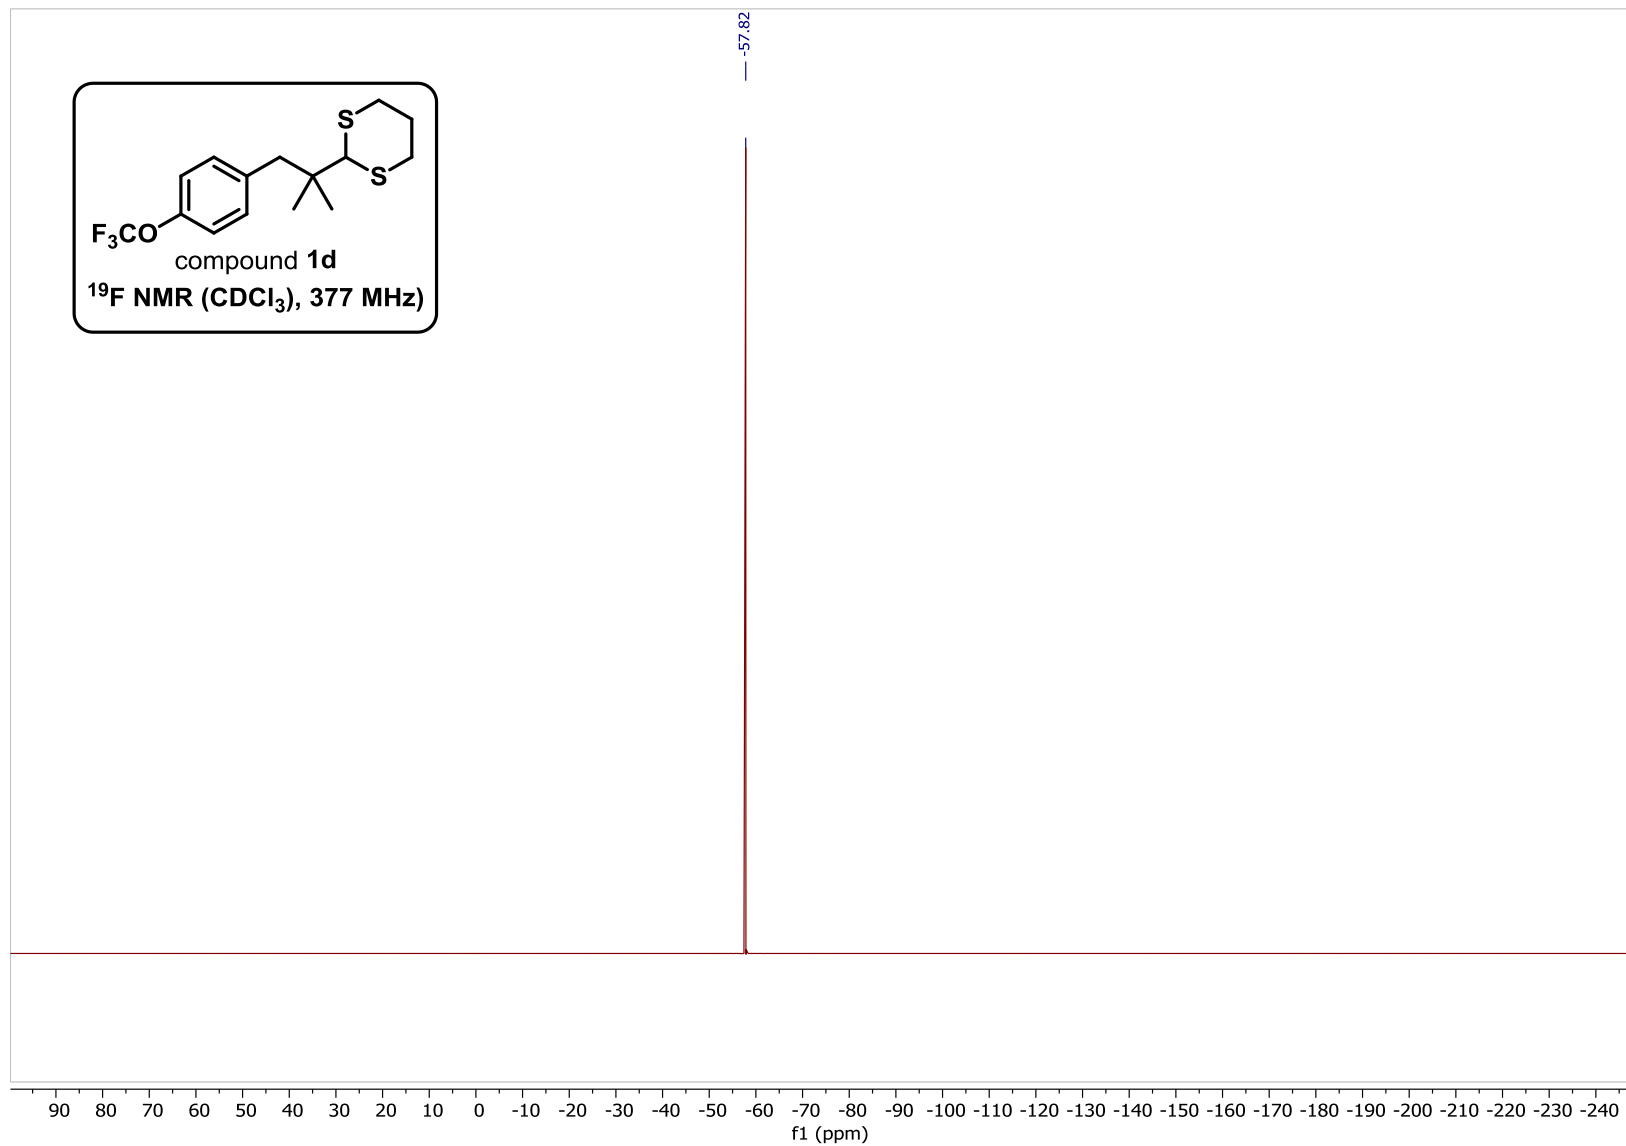

3.15. Compound 1e

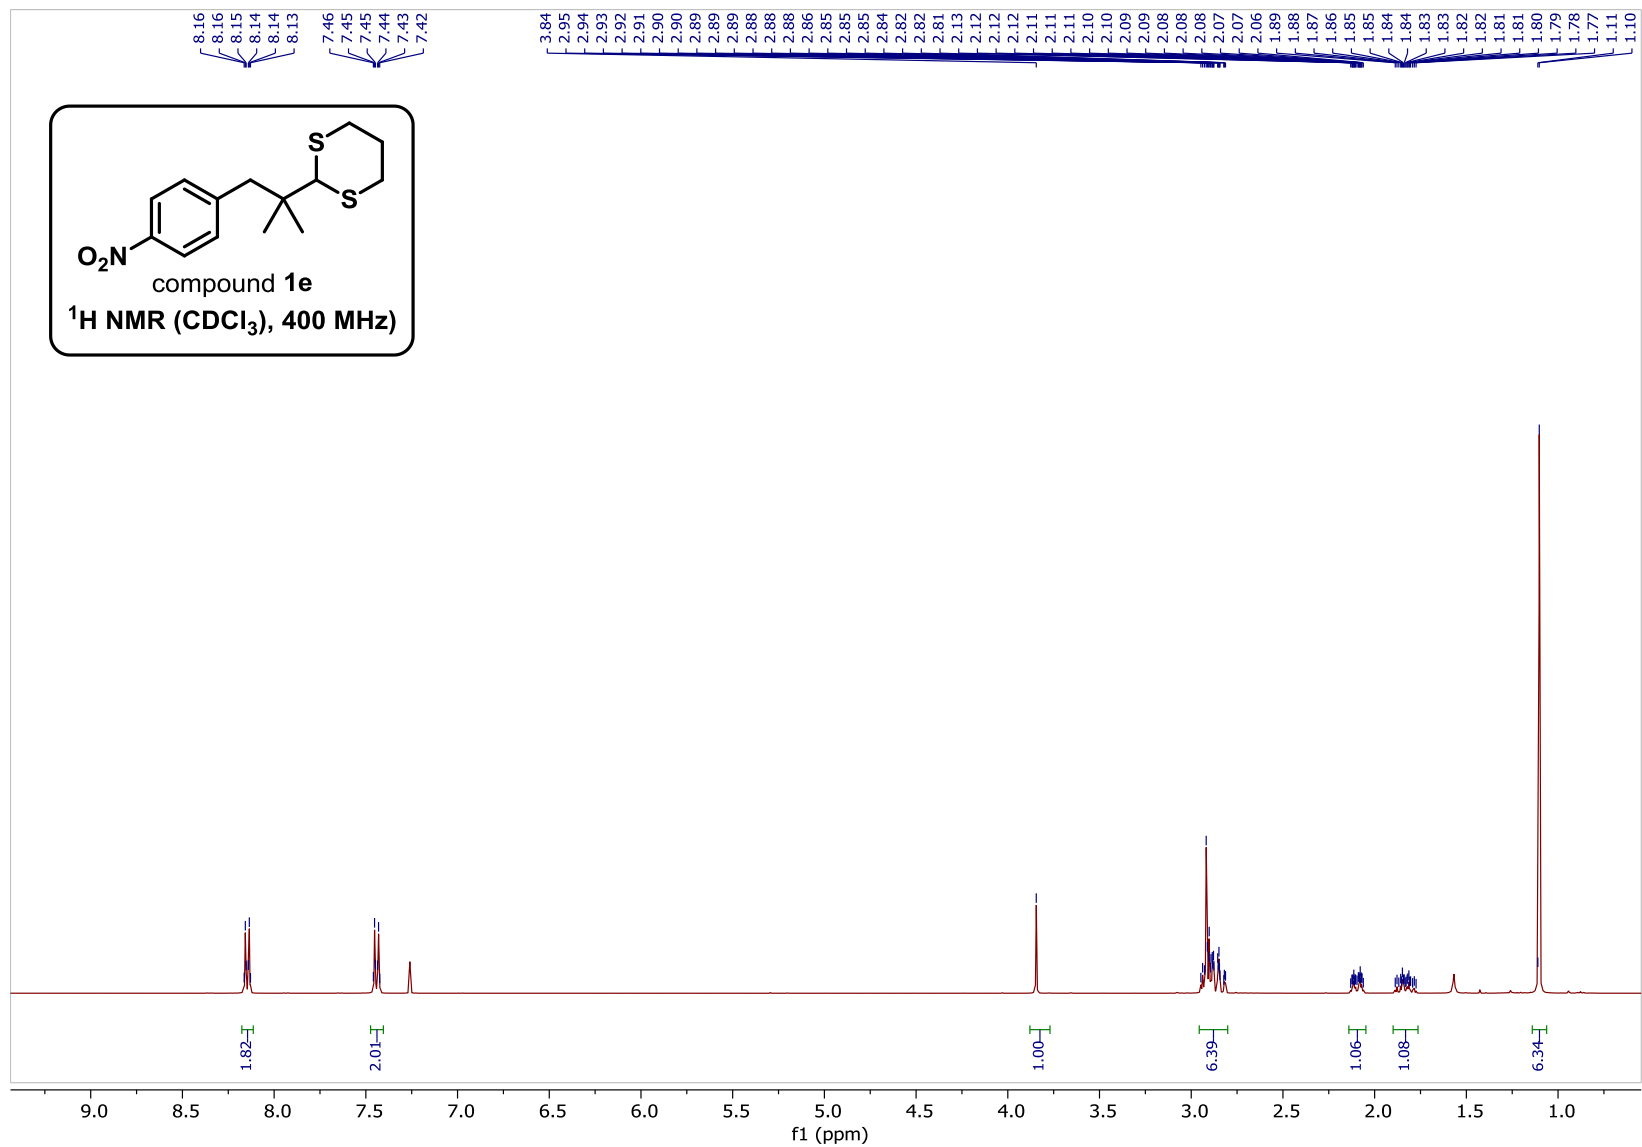



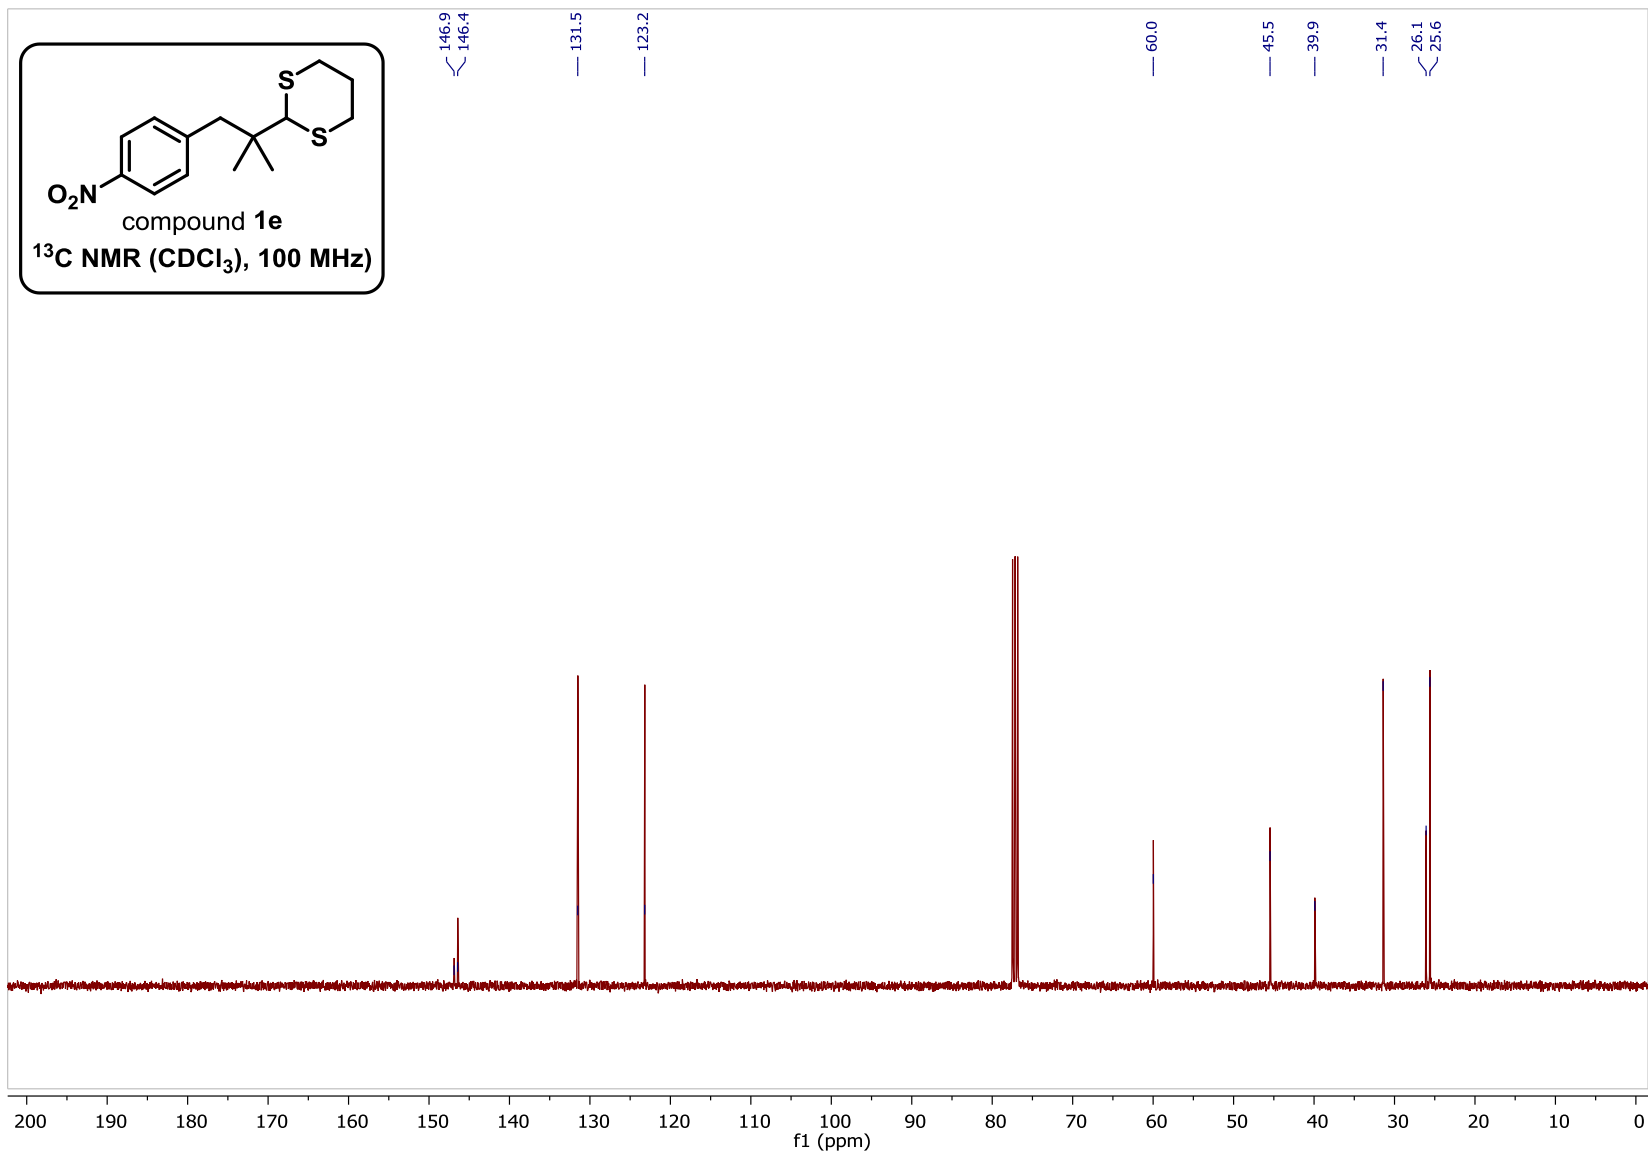

3.16. Compound 1f

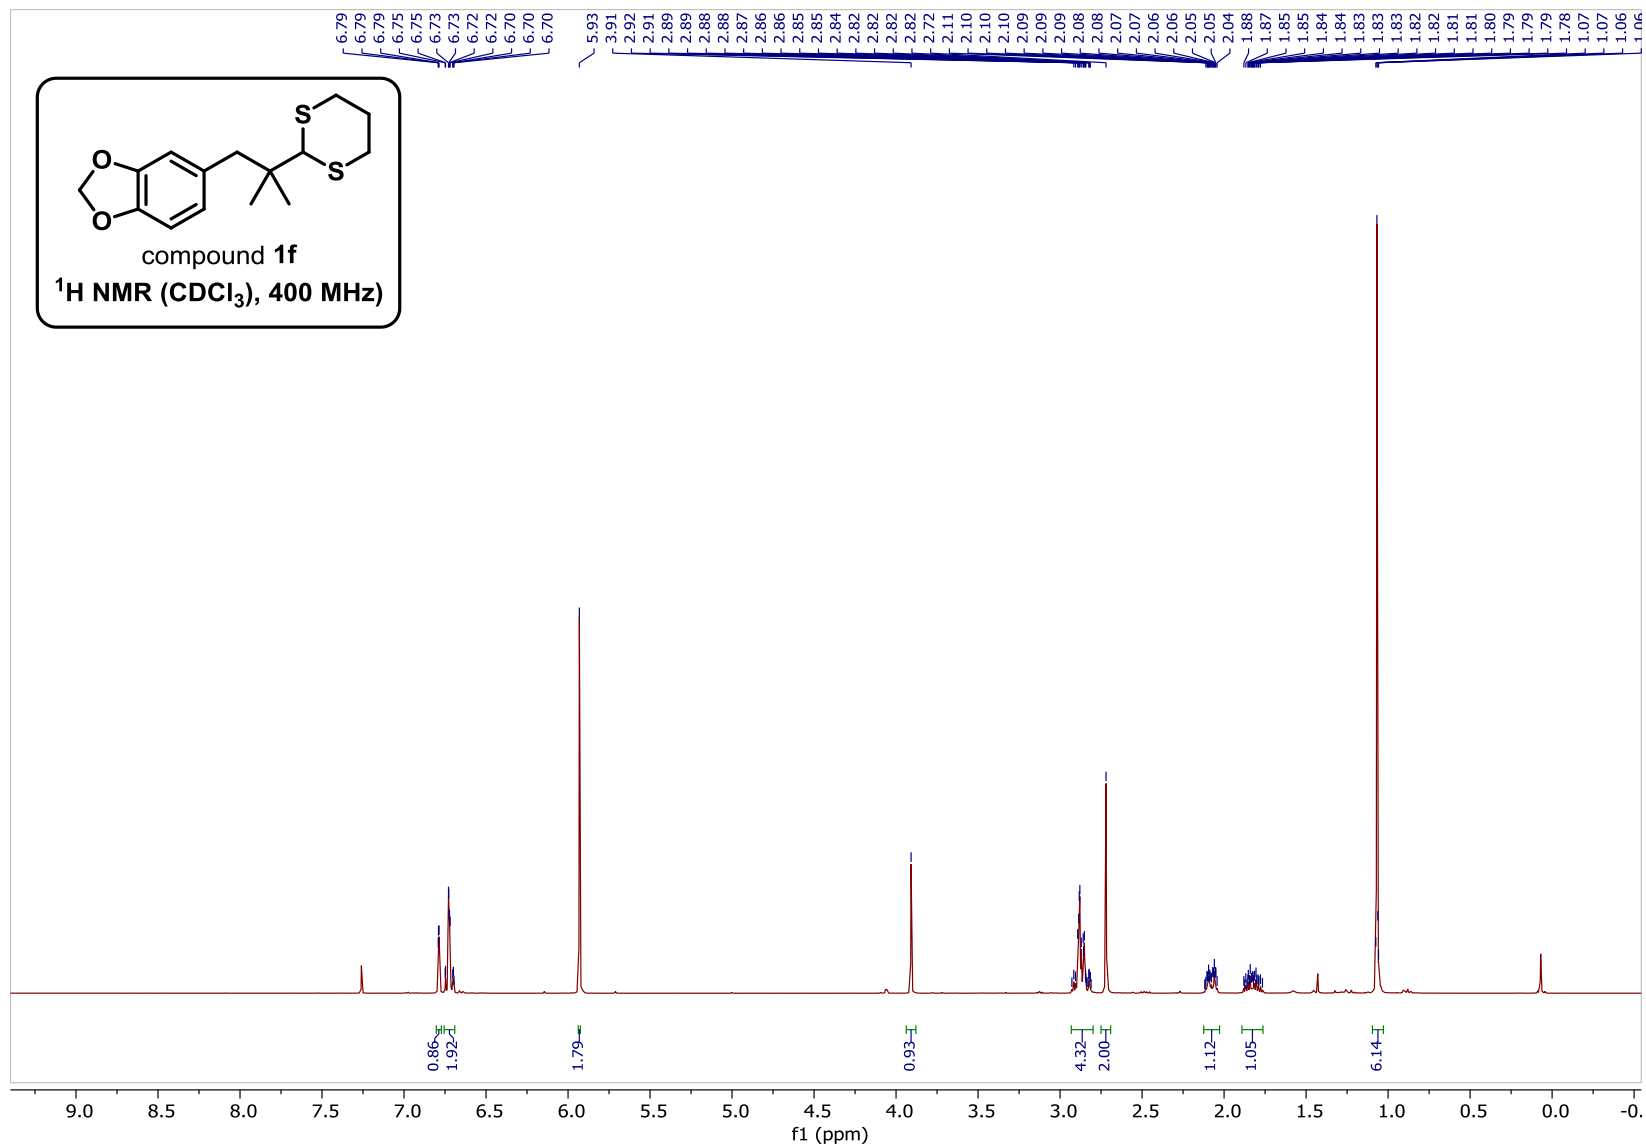

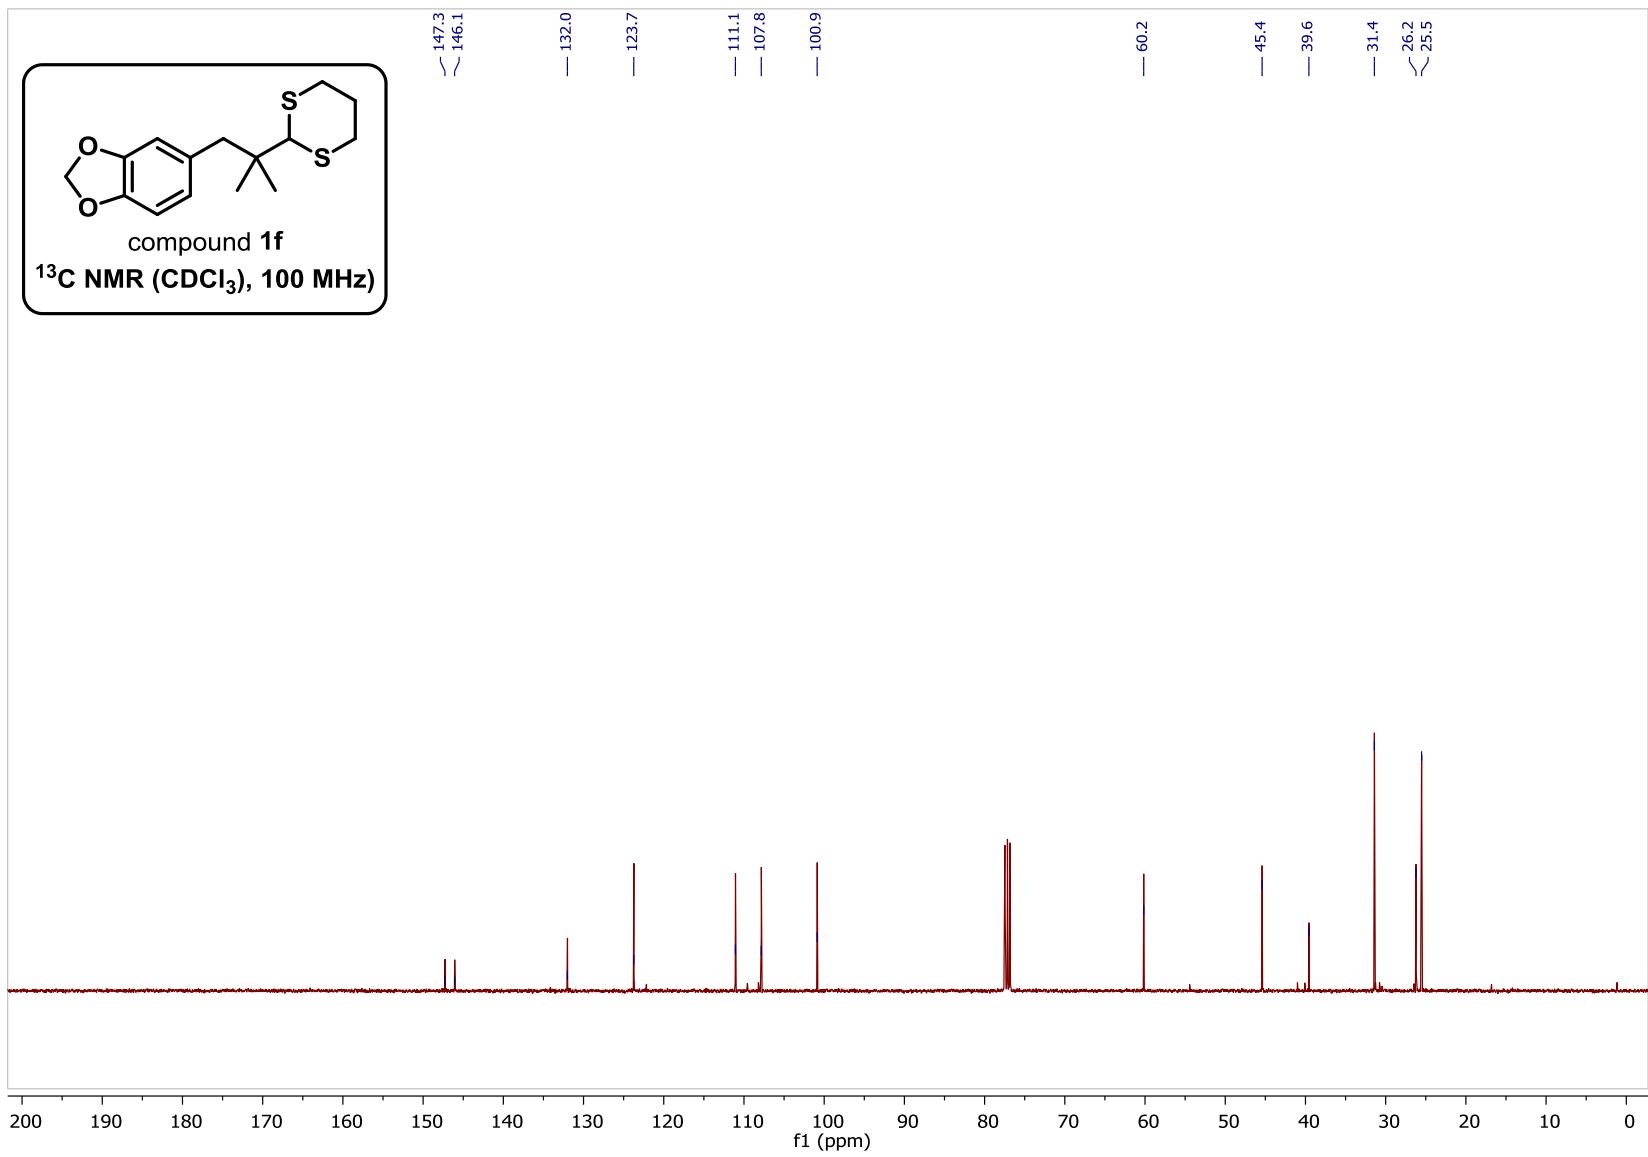

3.17. Compound 1g

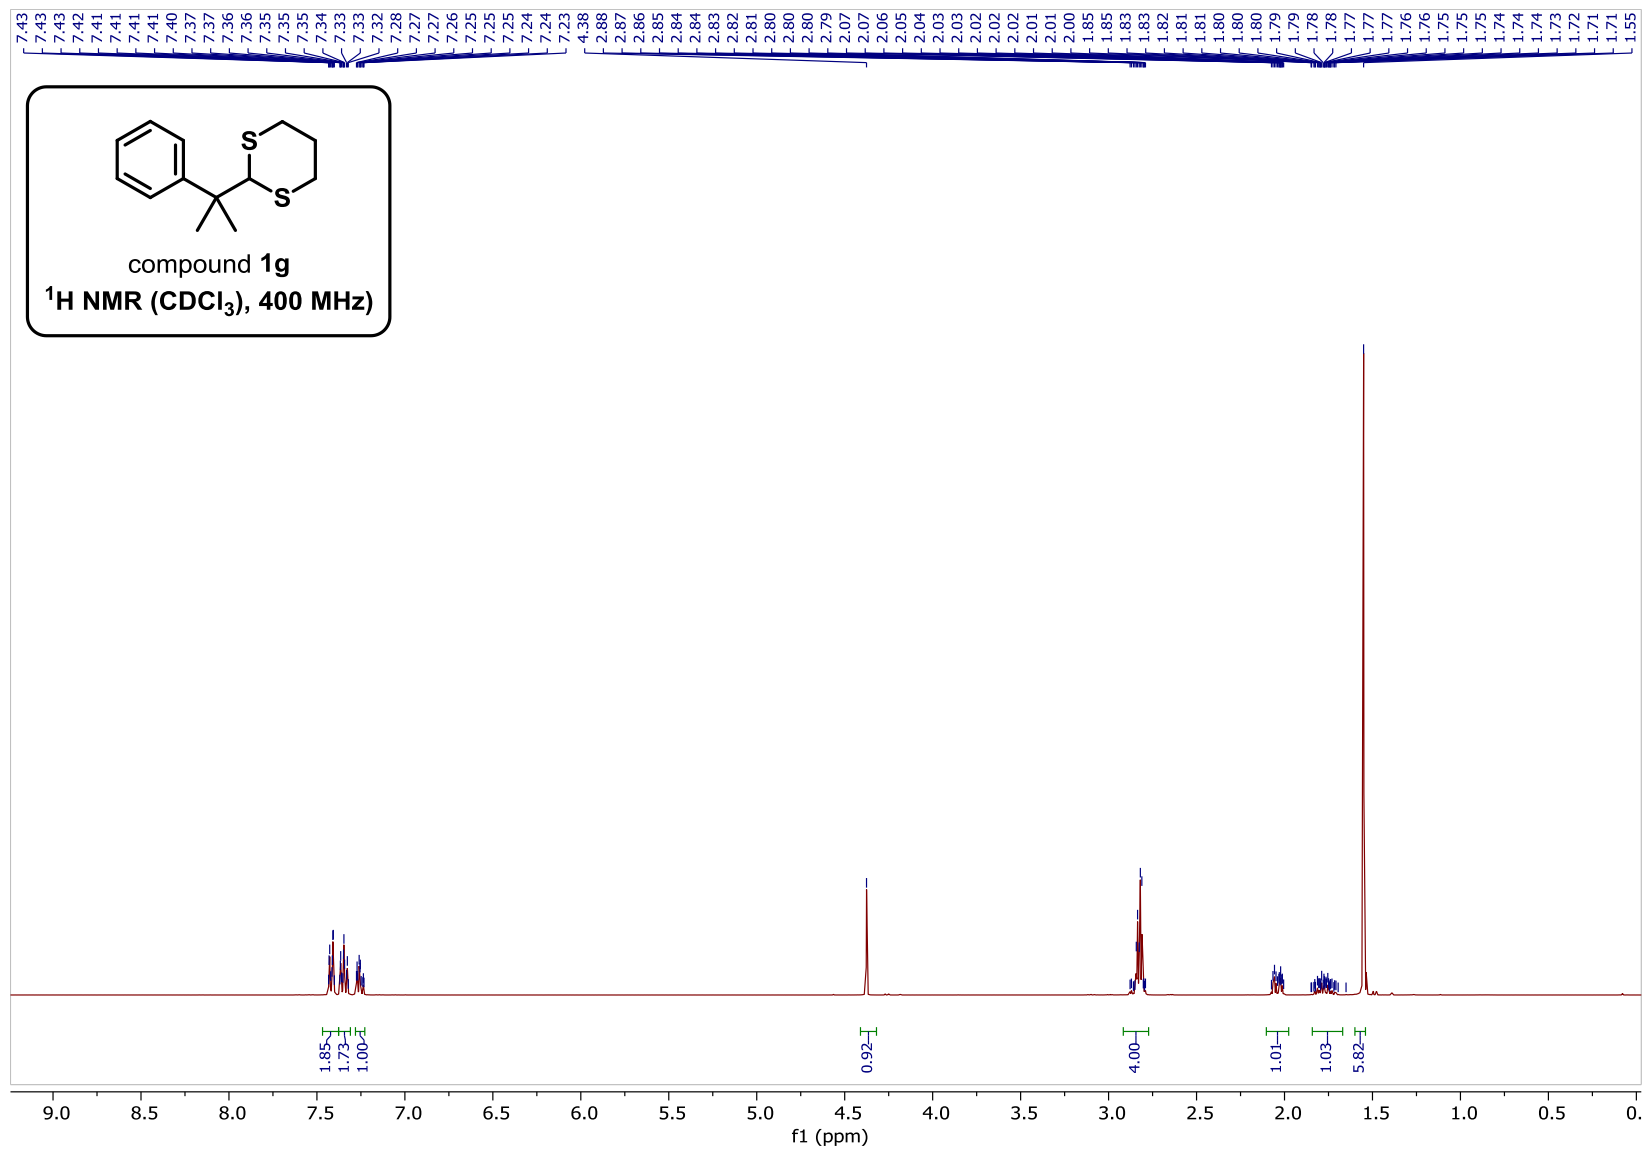

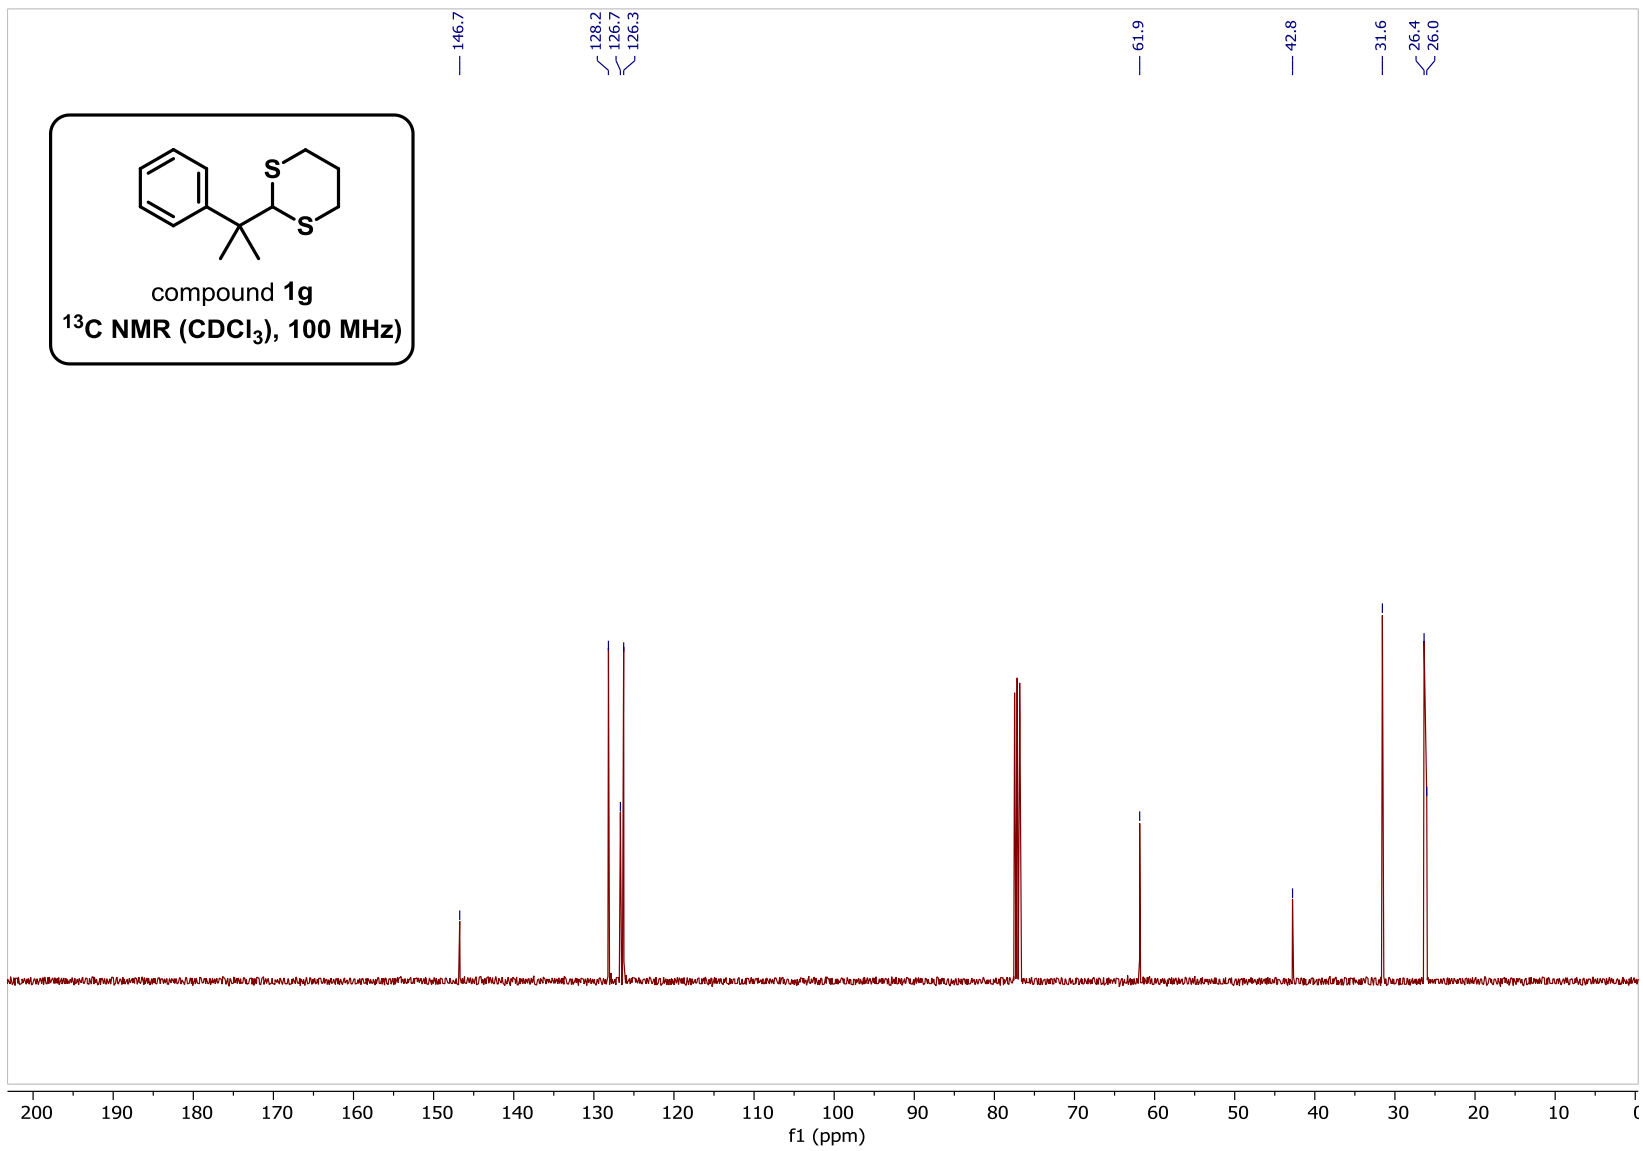

3.18. Compound 1h

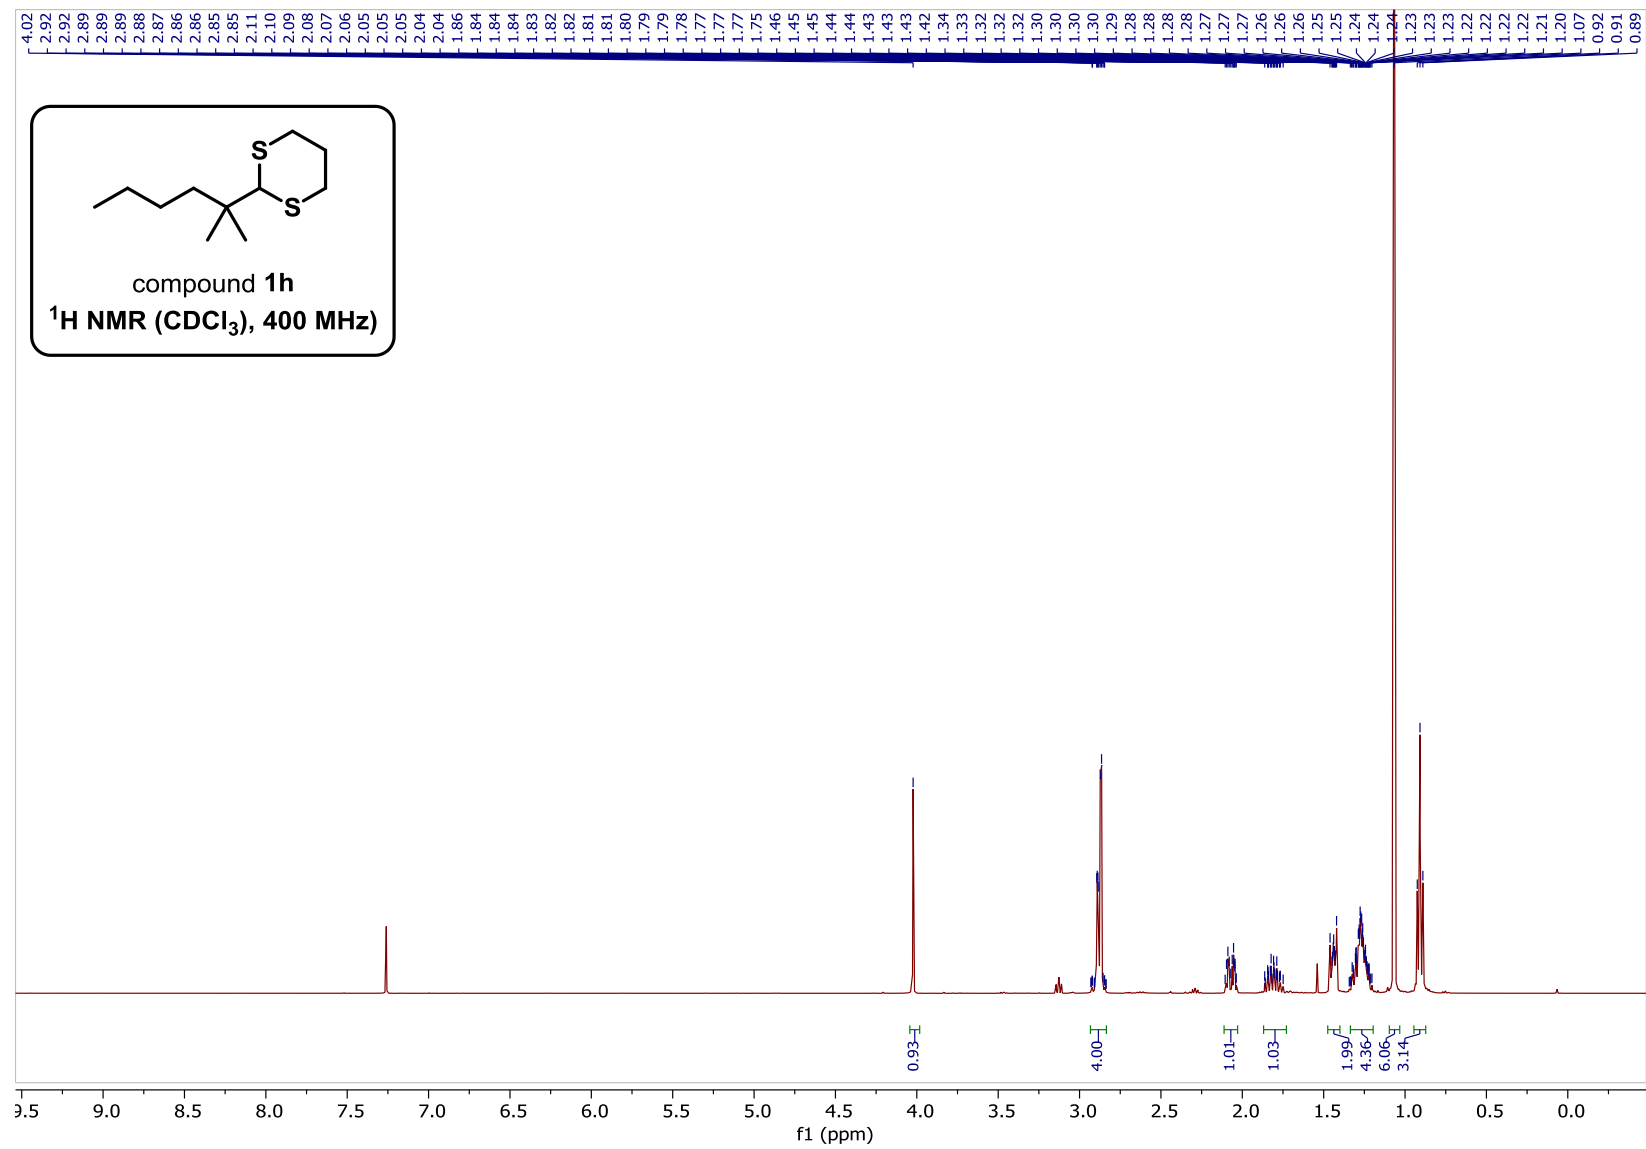

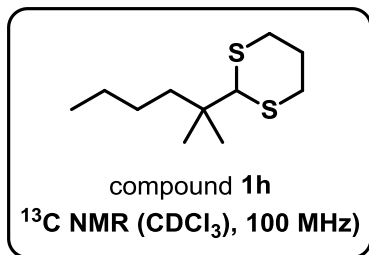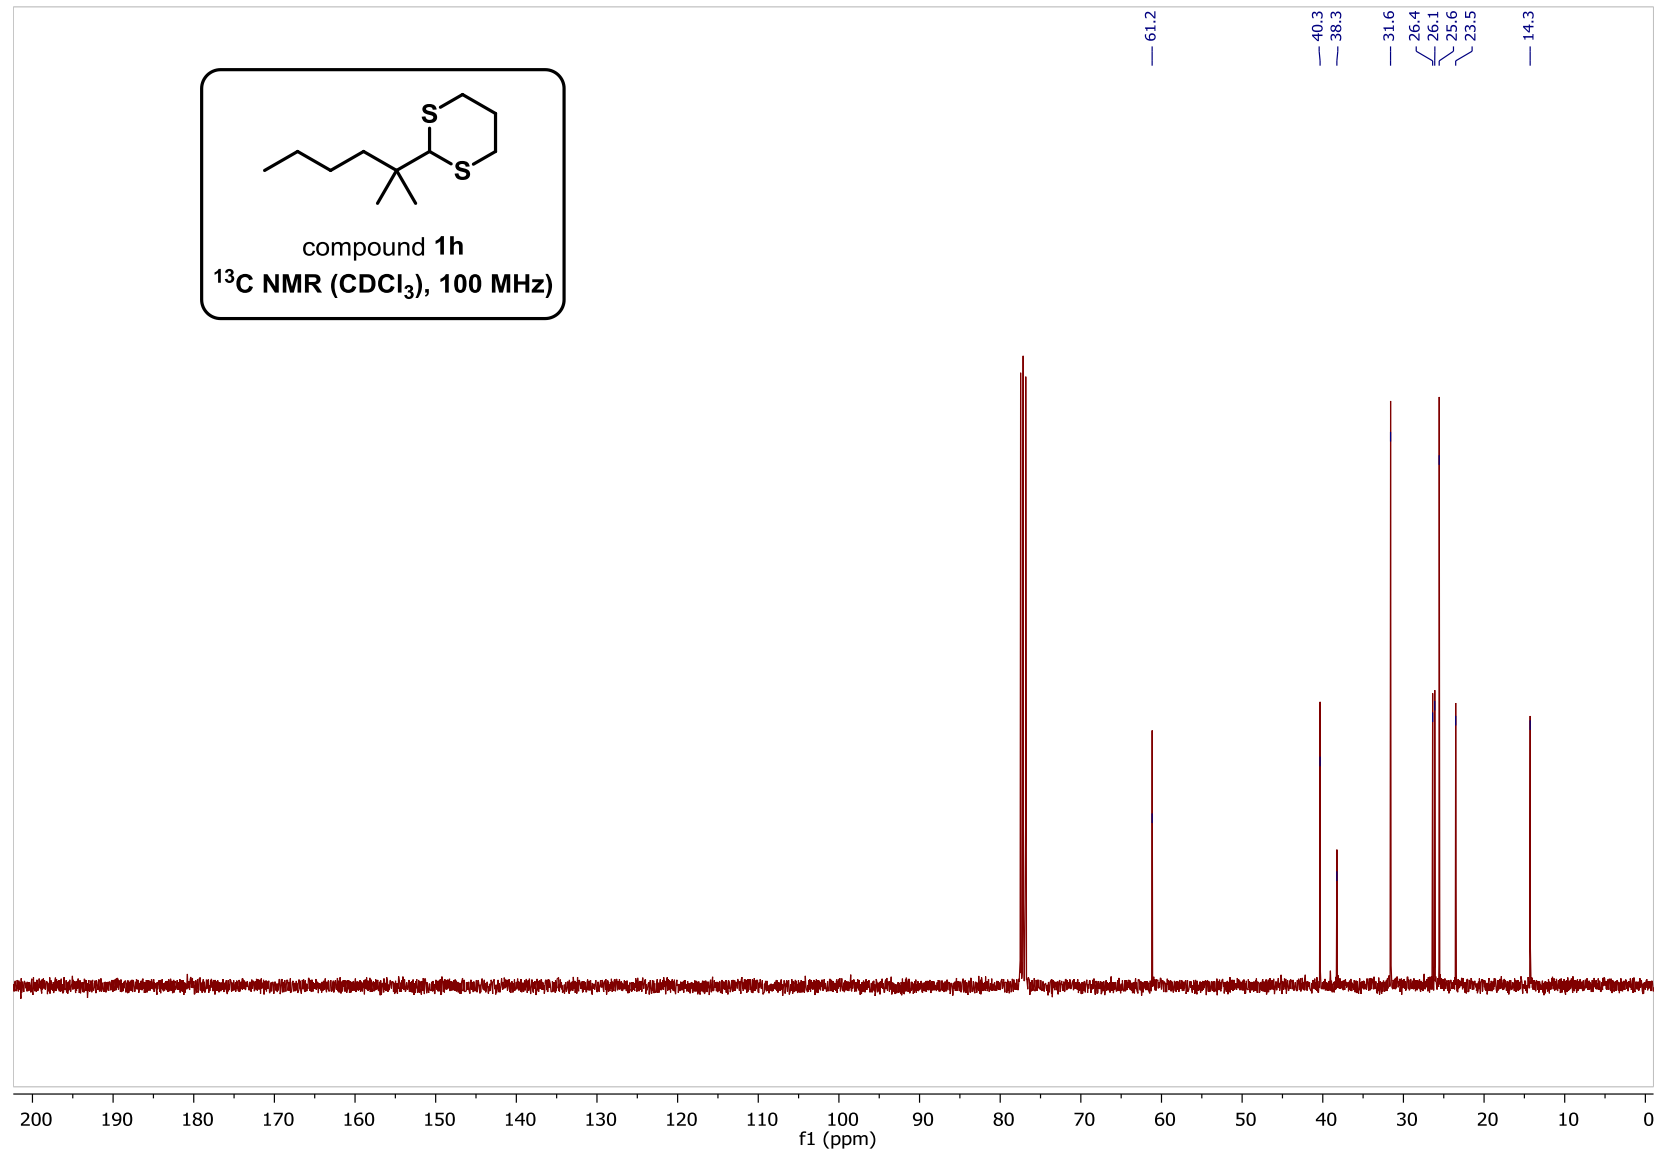

3.19. Compound 1i

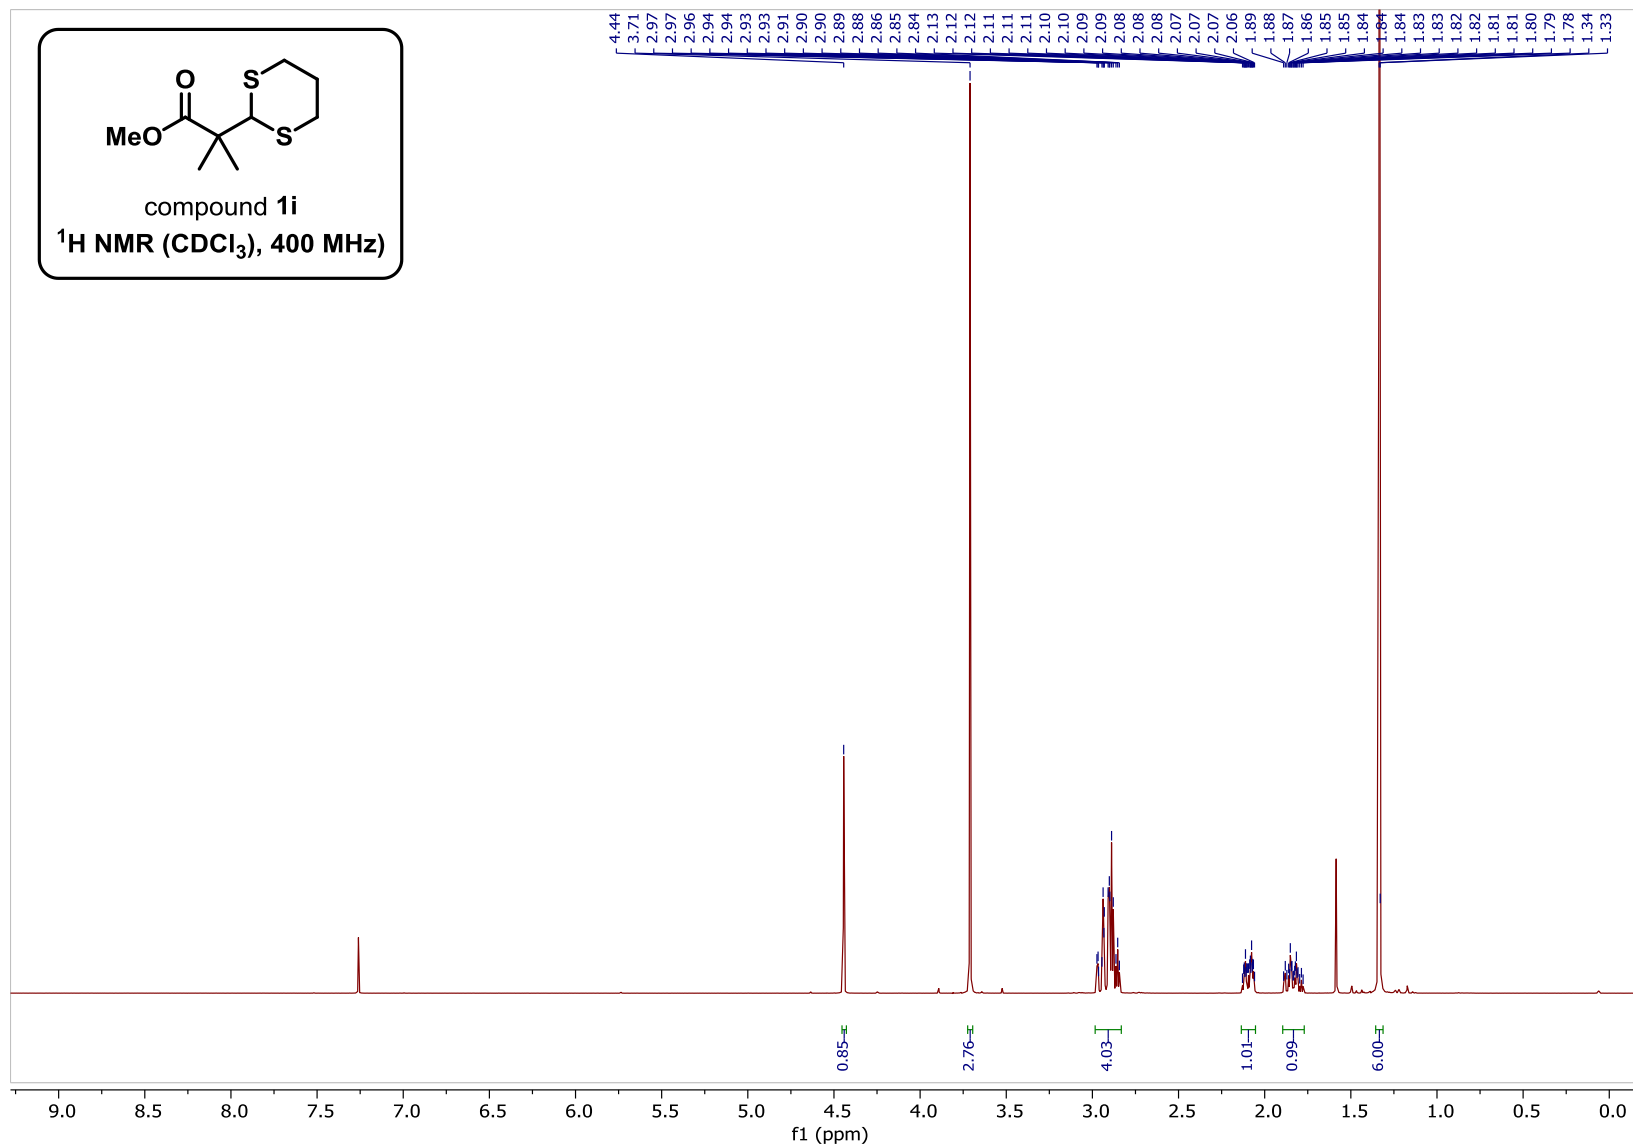



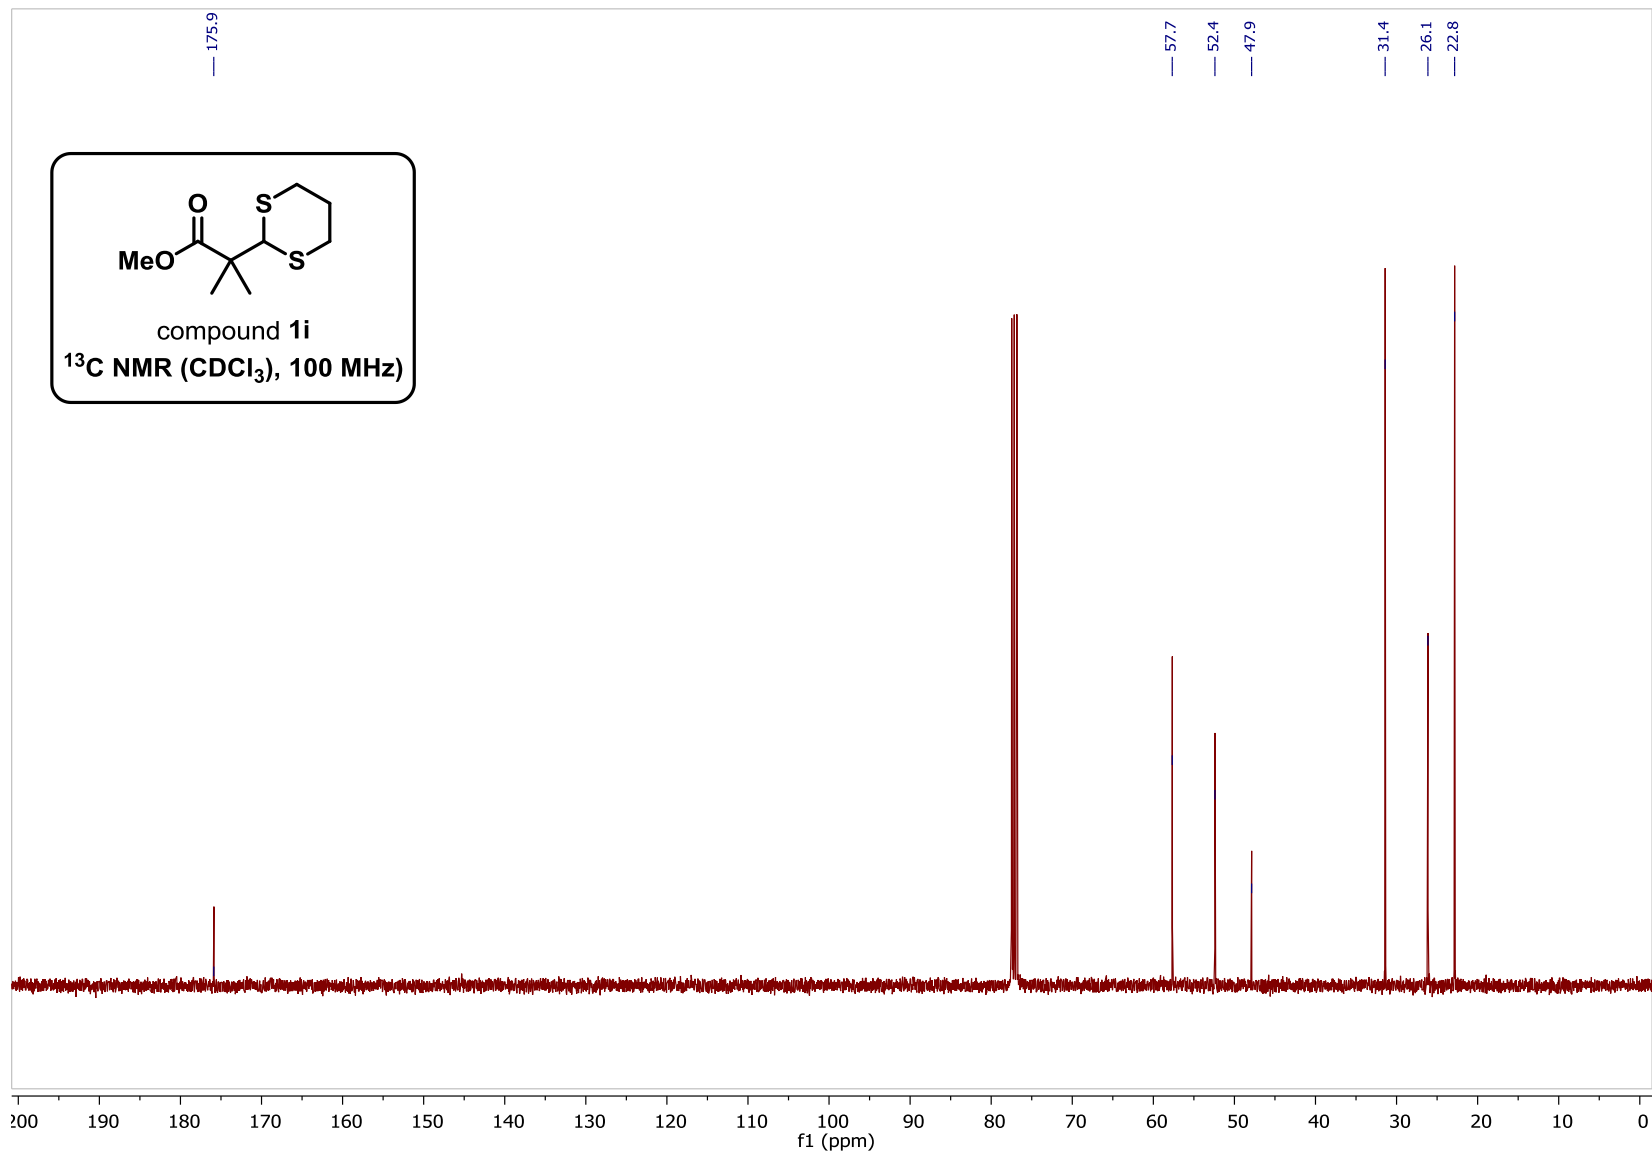

3.20. Compound 1j

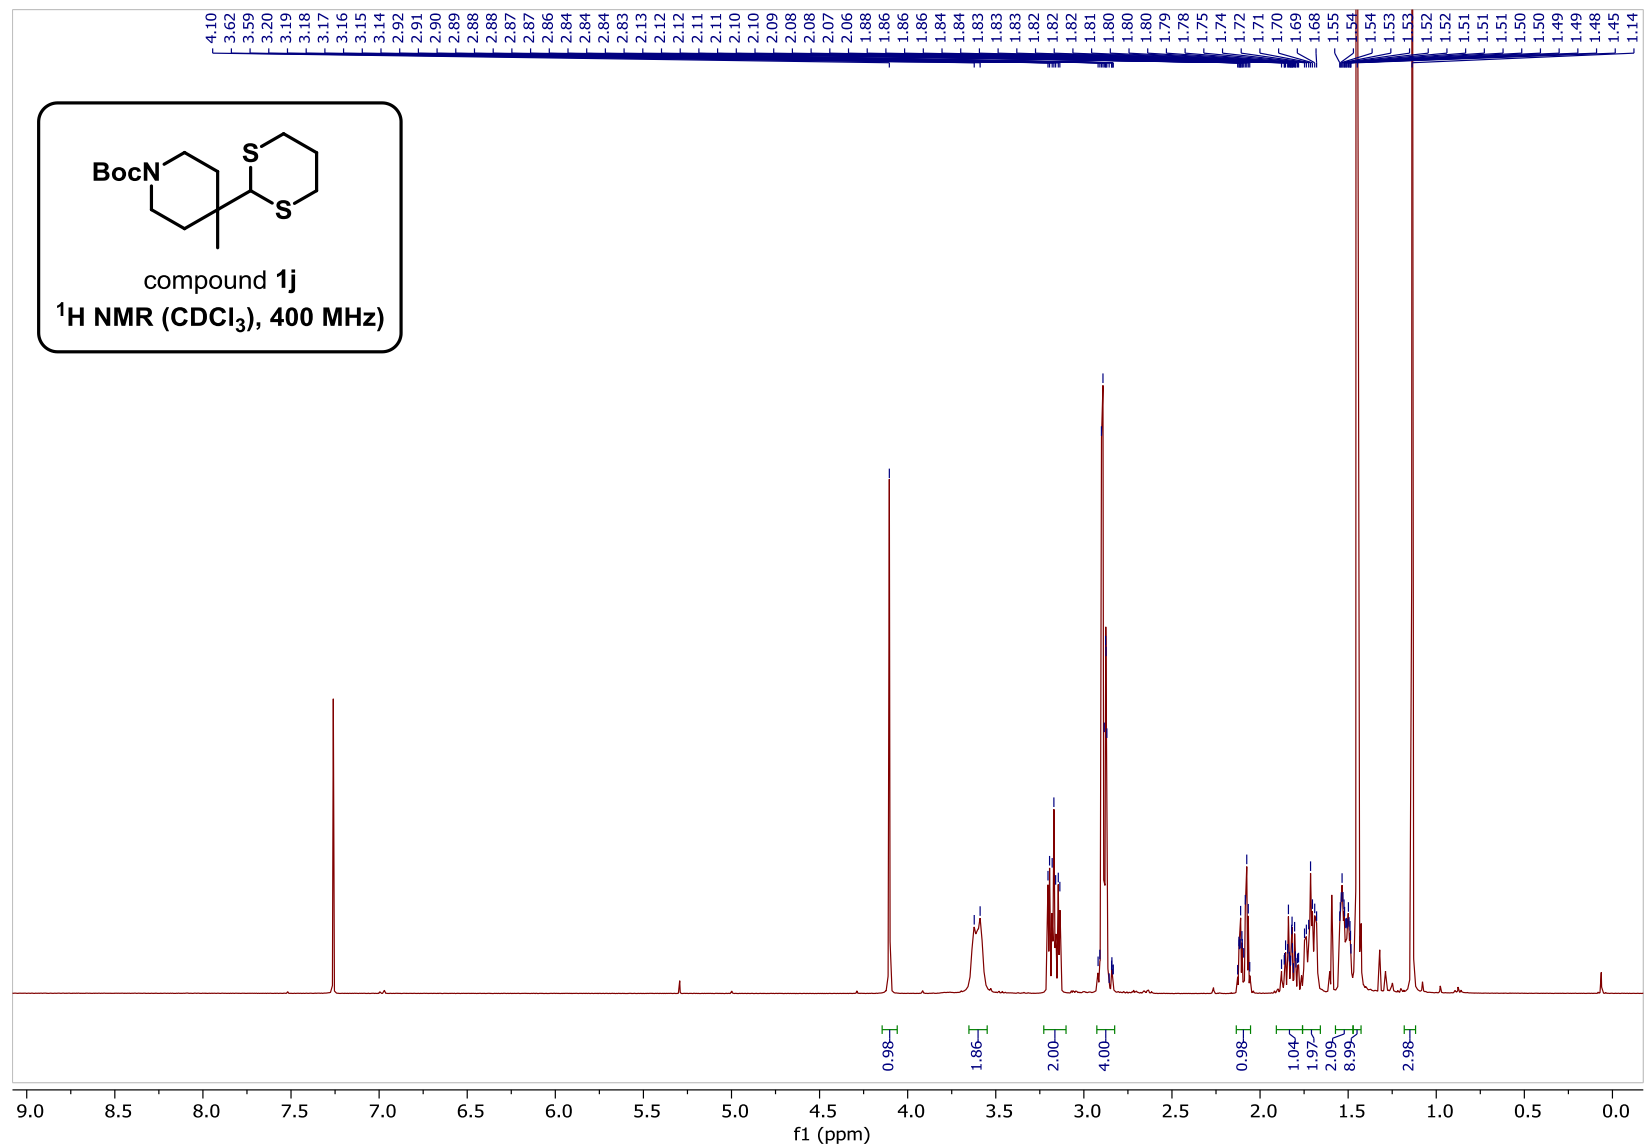

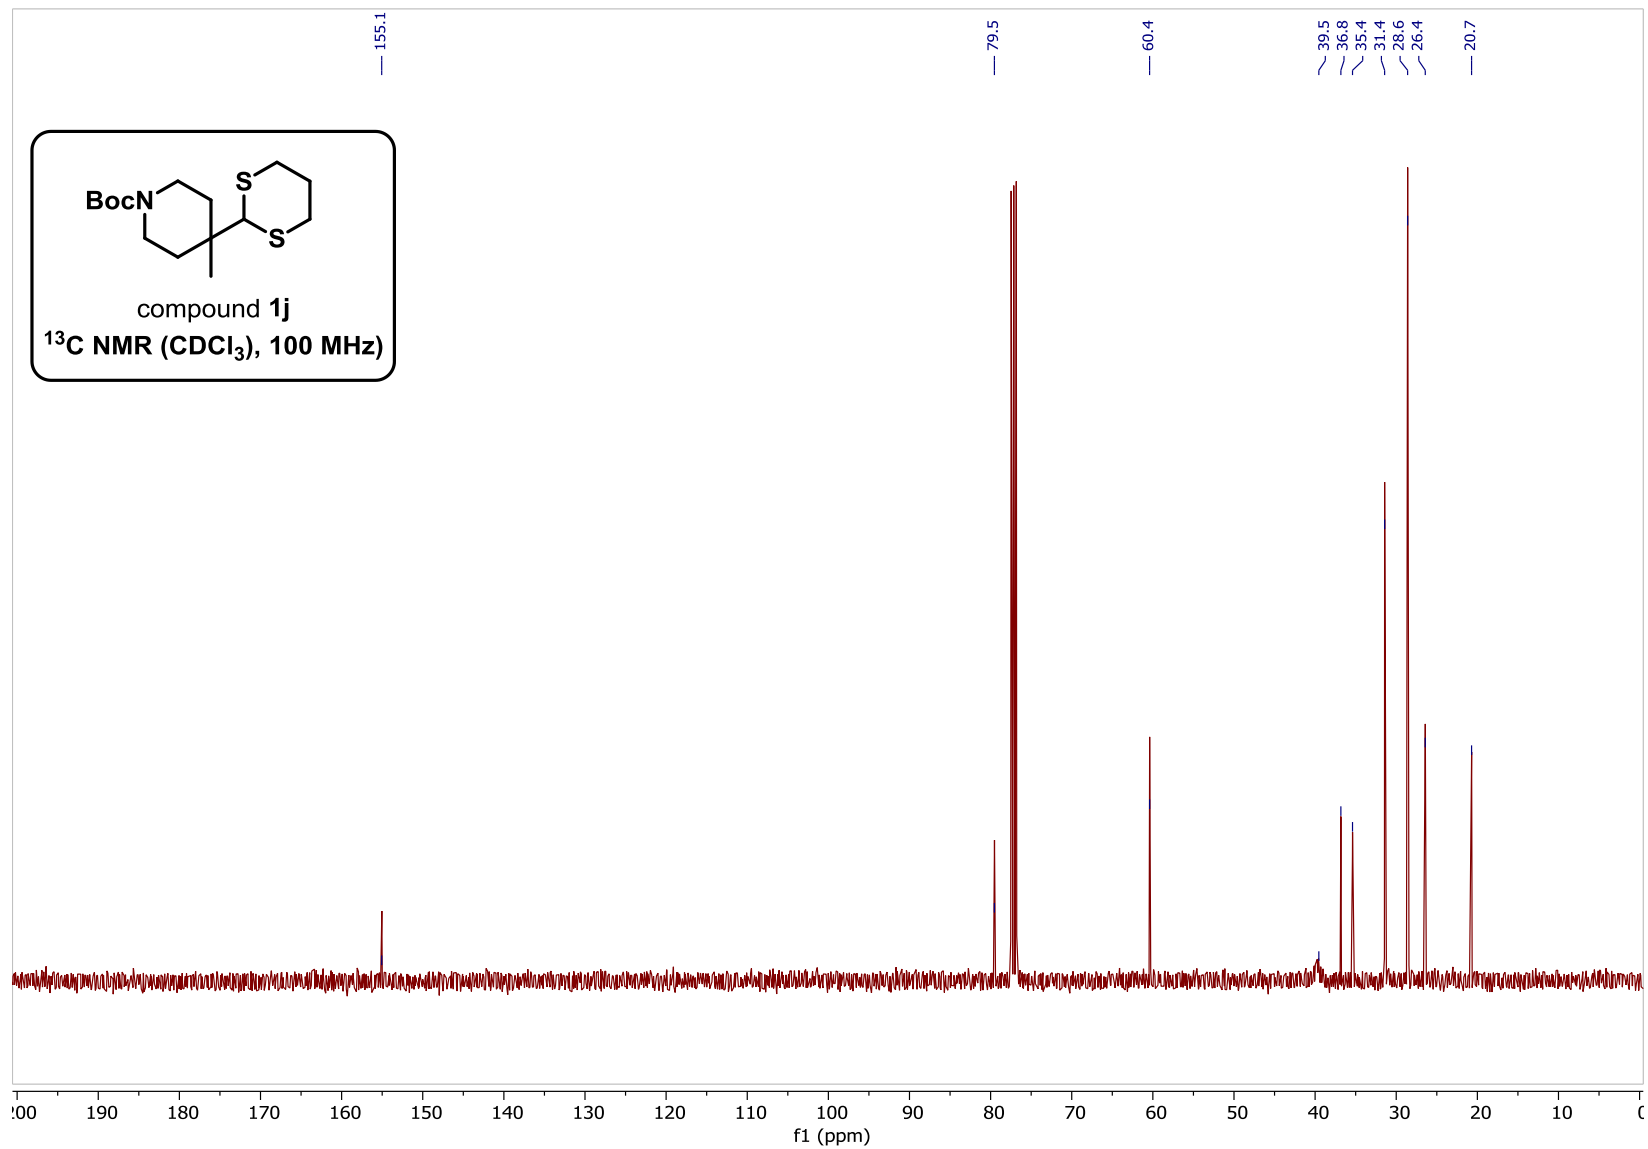

3.21. Compound 3a

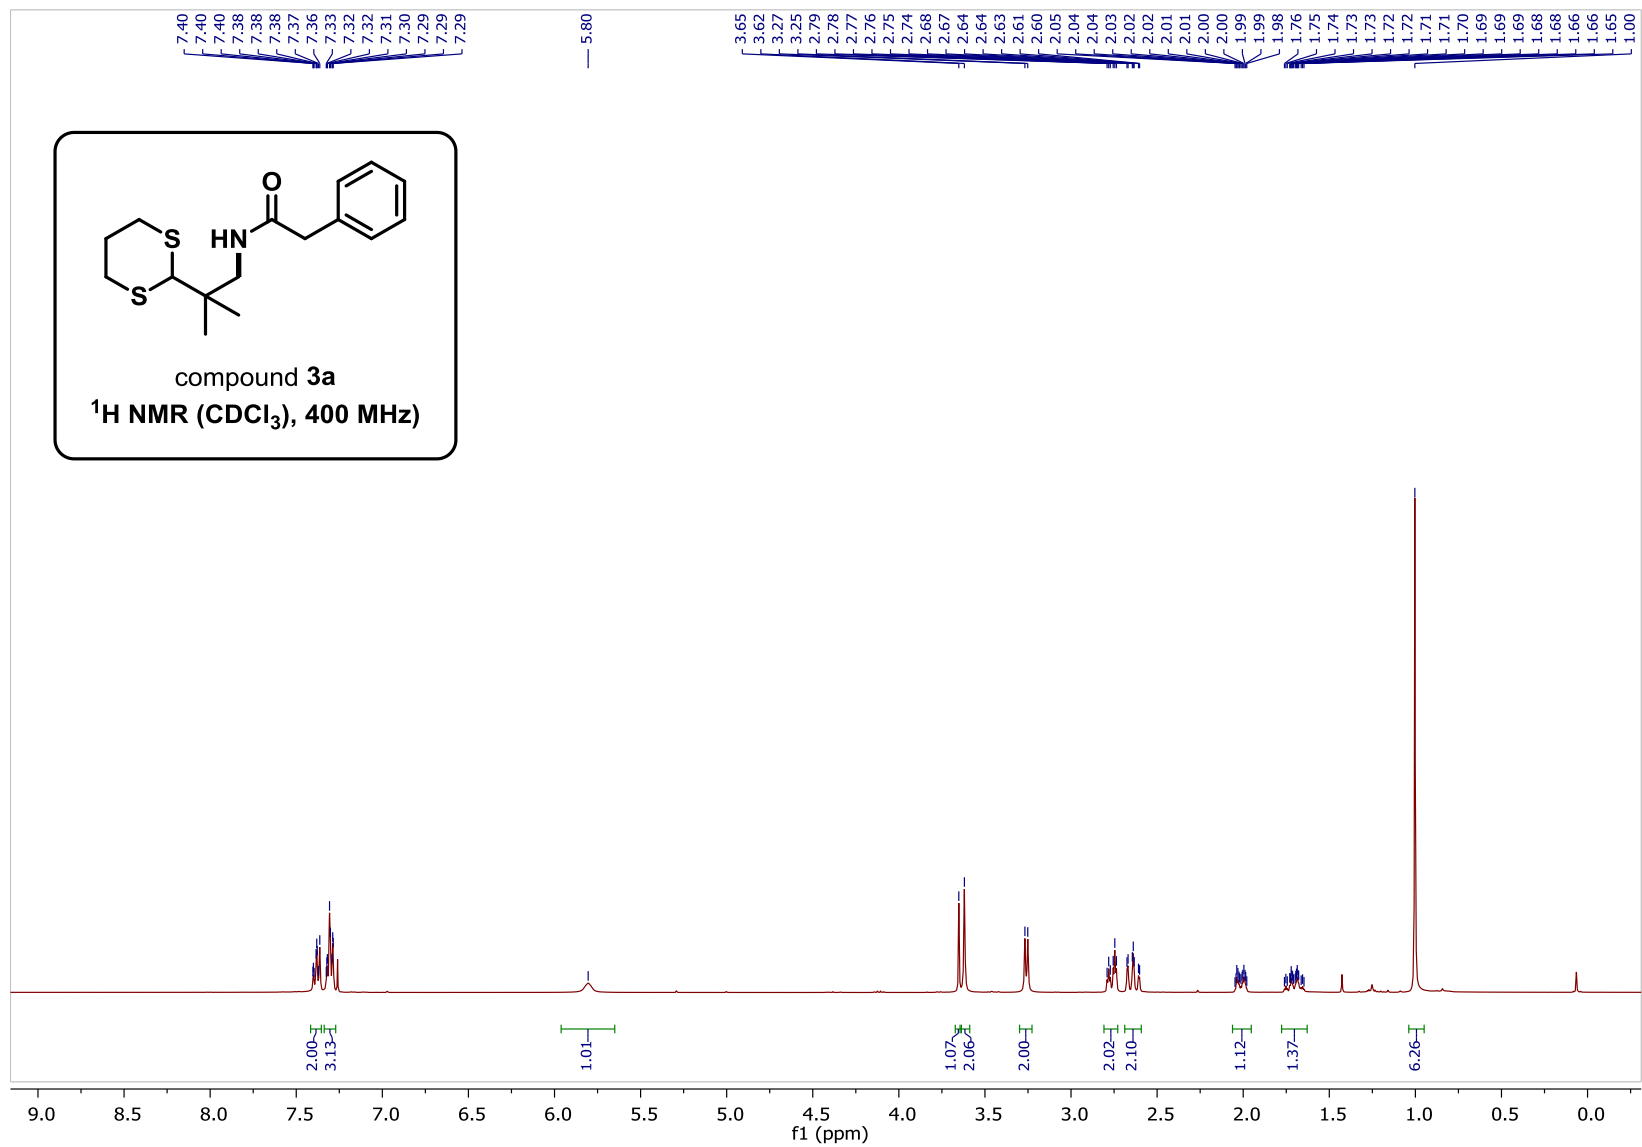

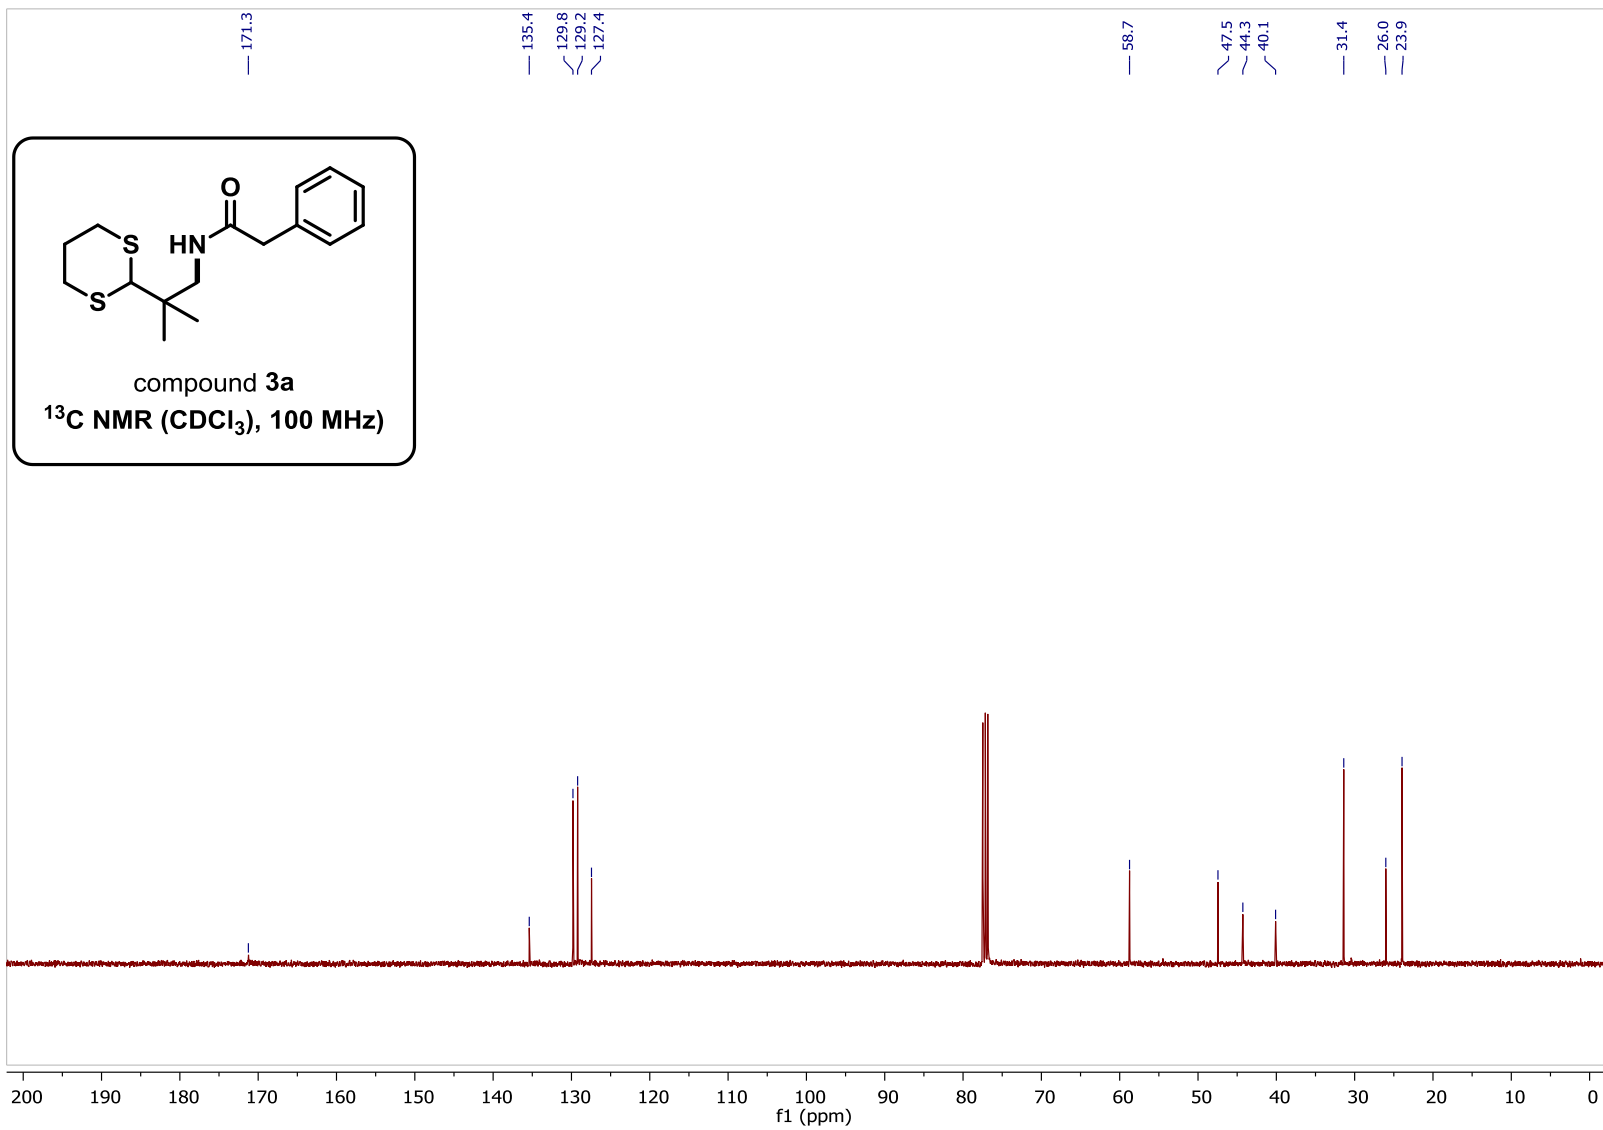

3.22. Compound 3b

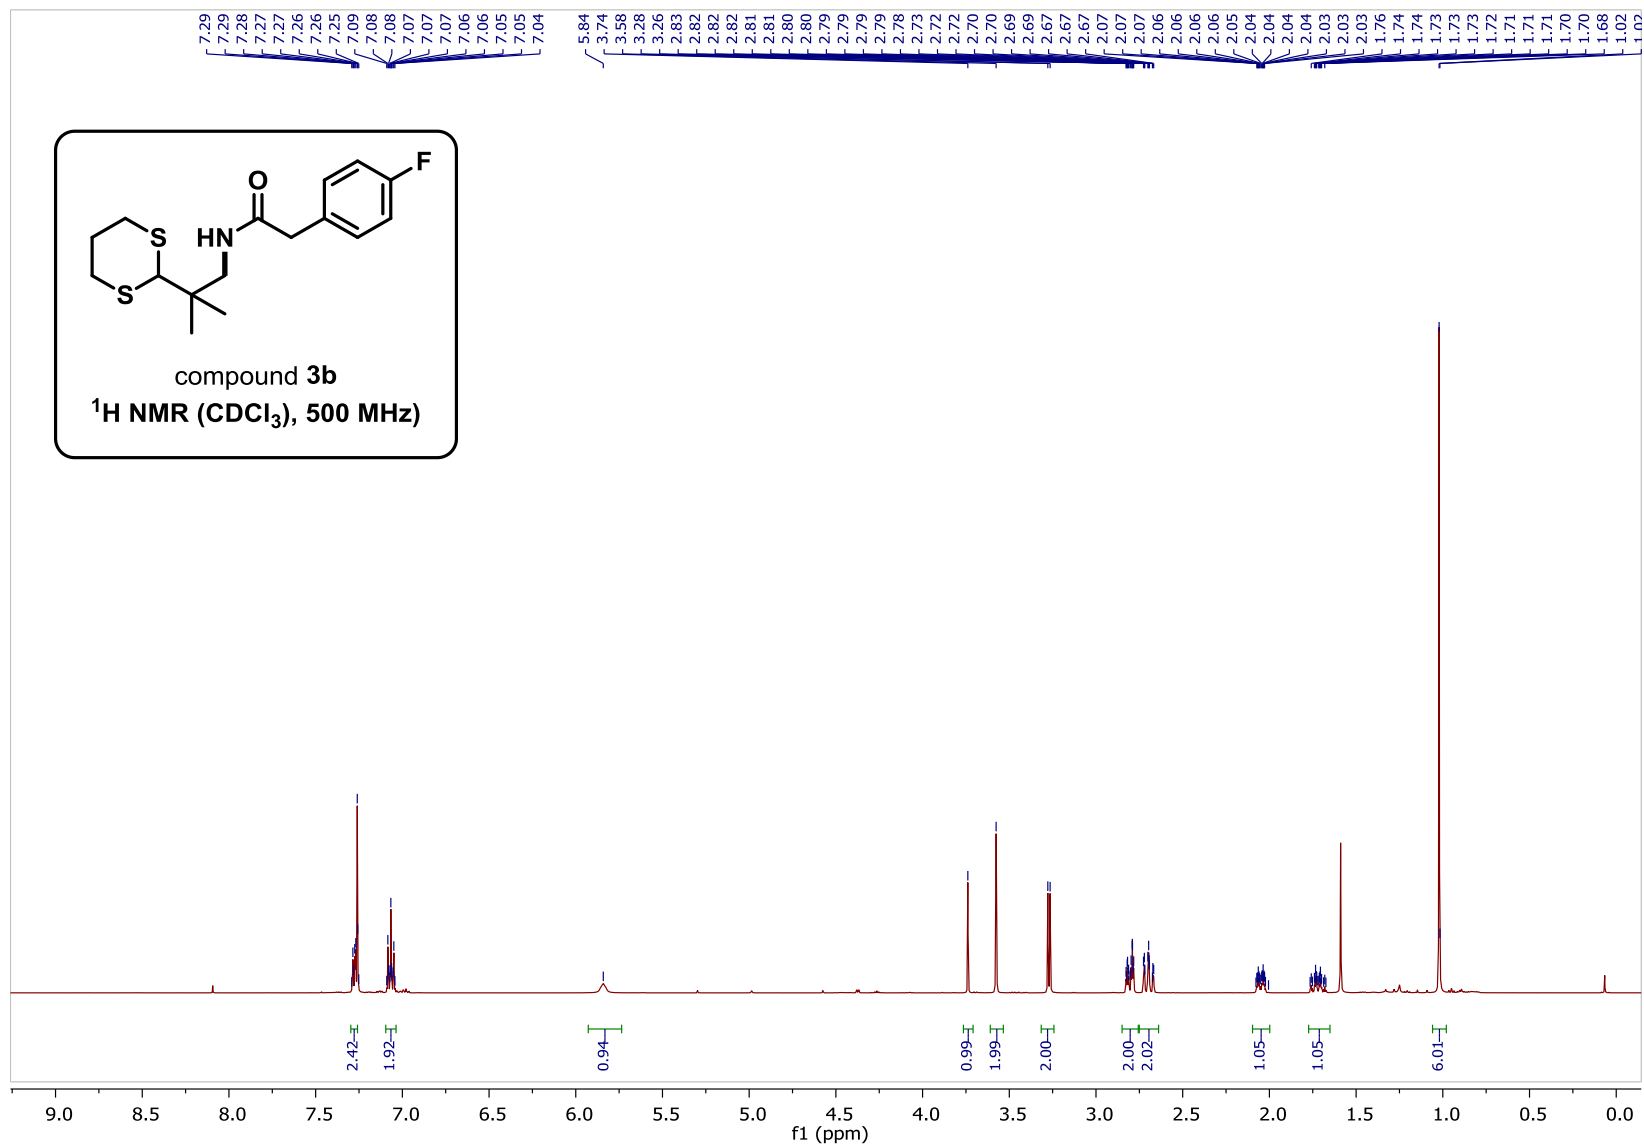

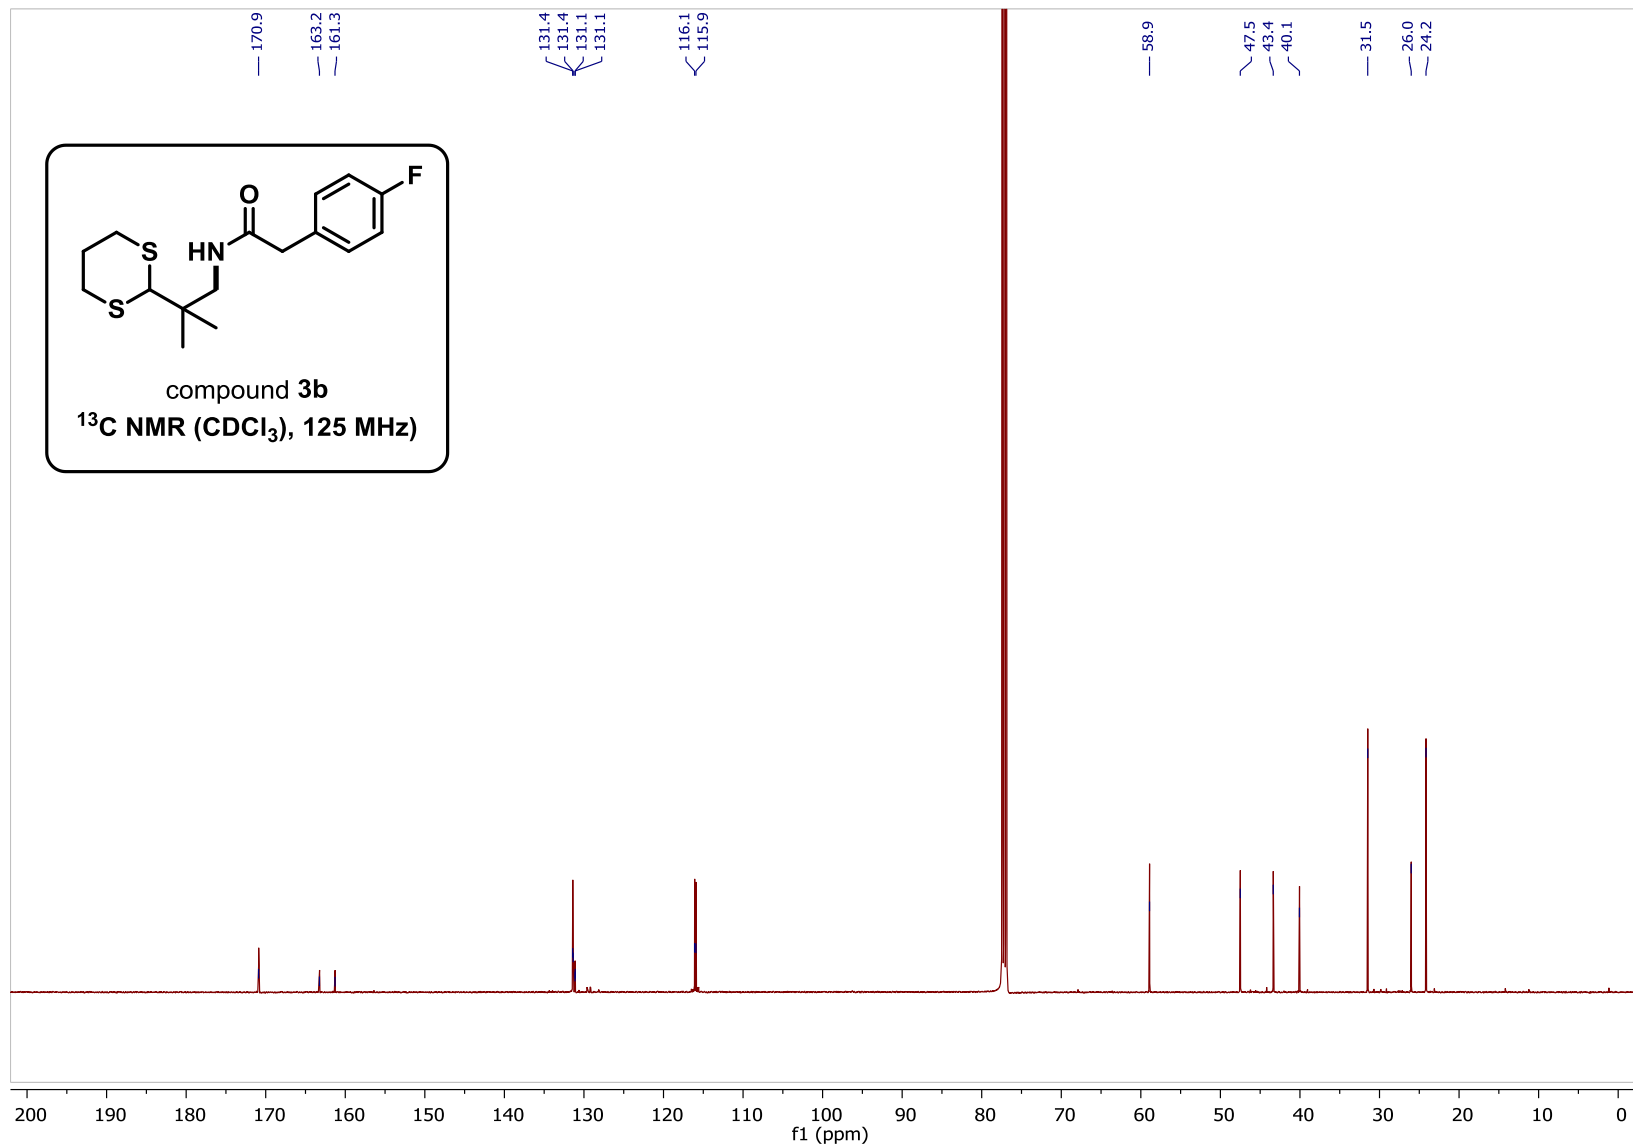

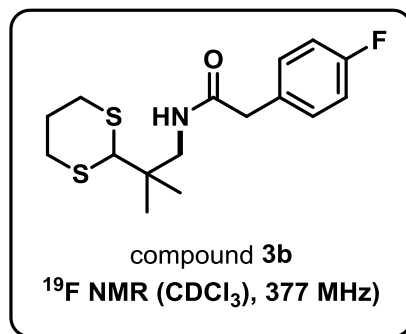

-115.30  
-115.31  
-115.32  
-115.33  
-115.34  
-115.35  
-115.36

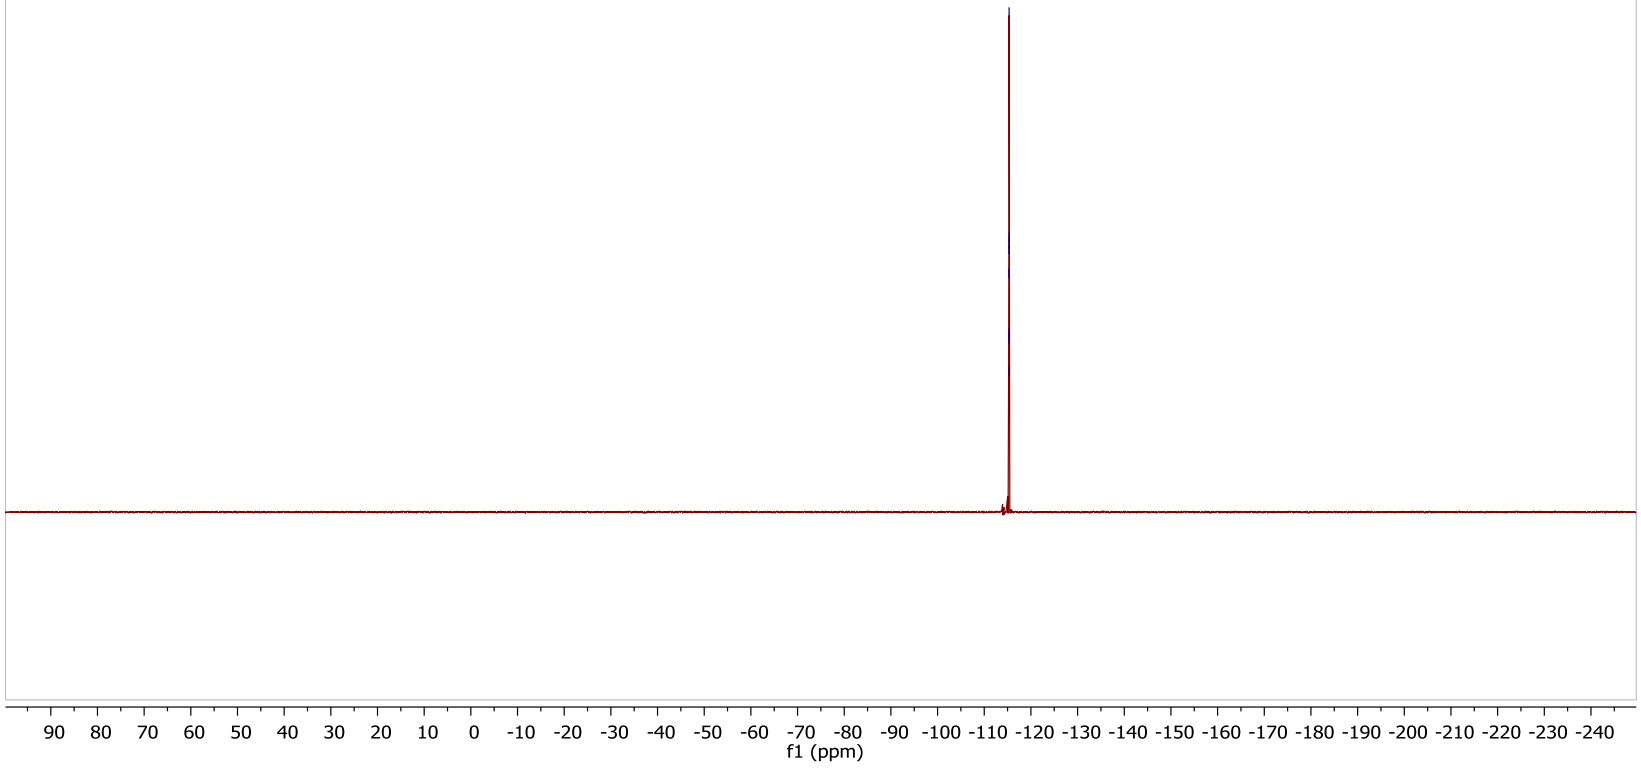



3.23. Compound 3c

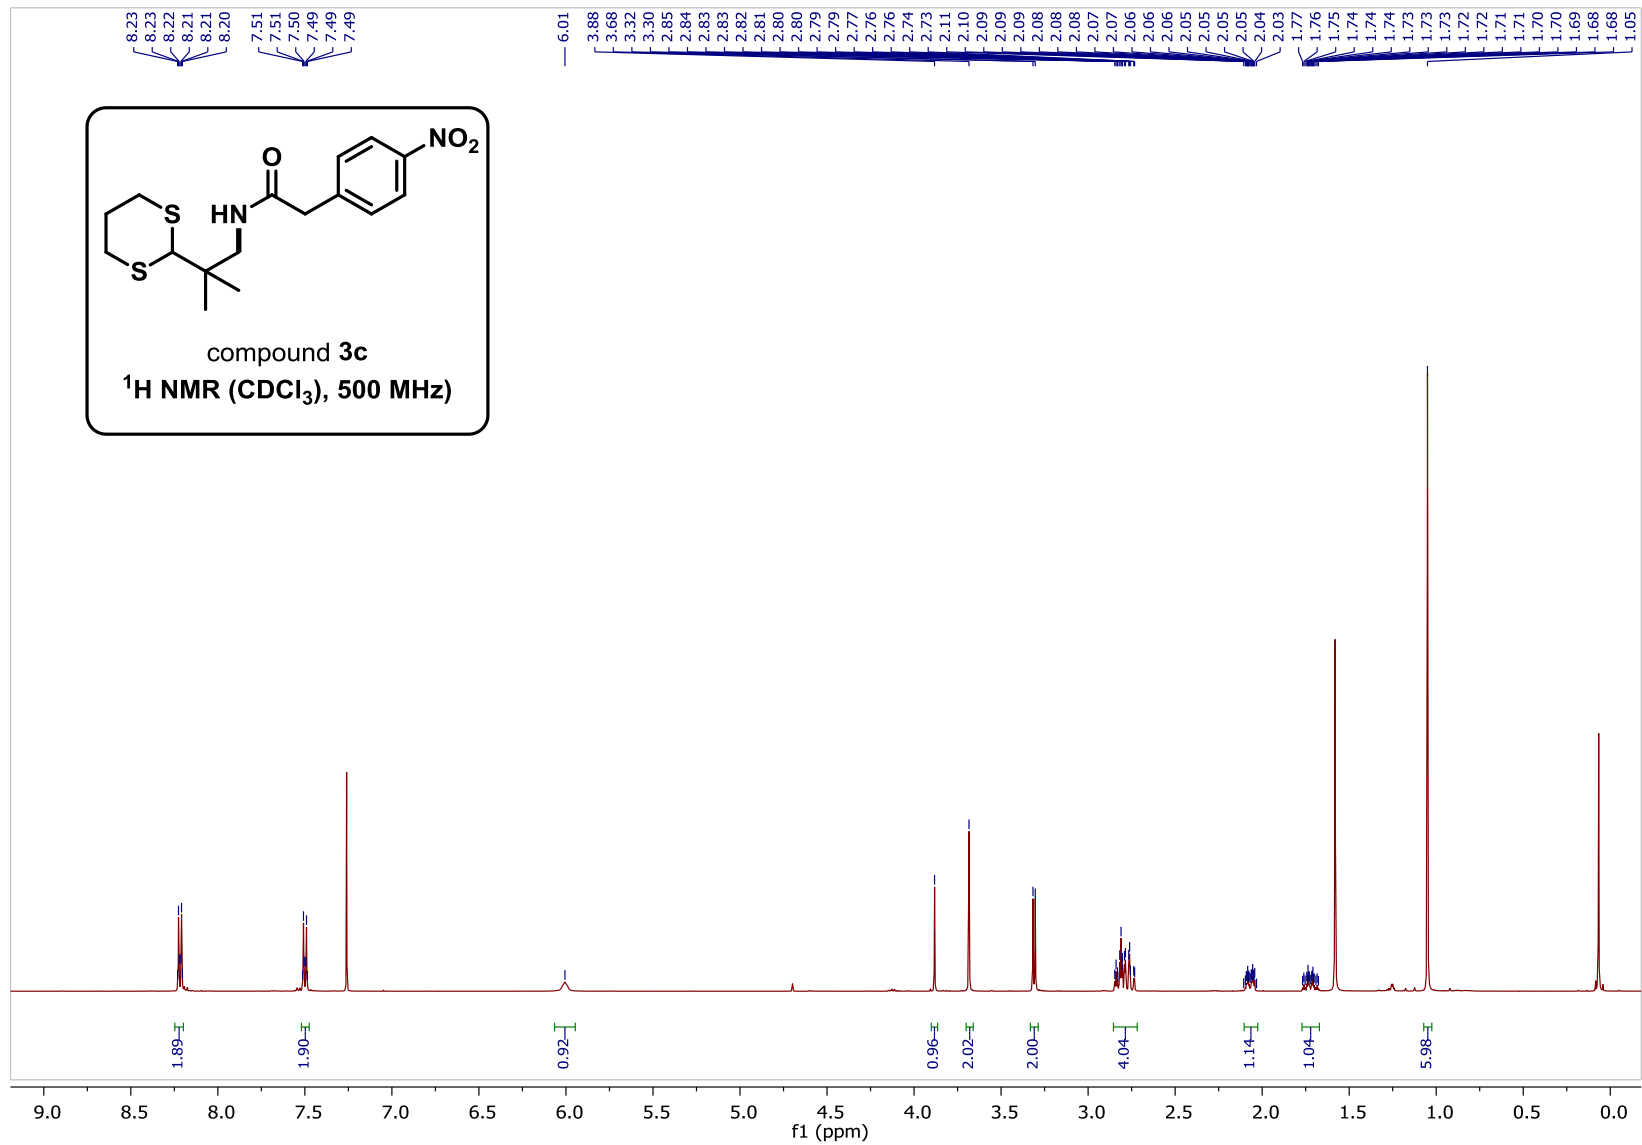

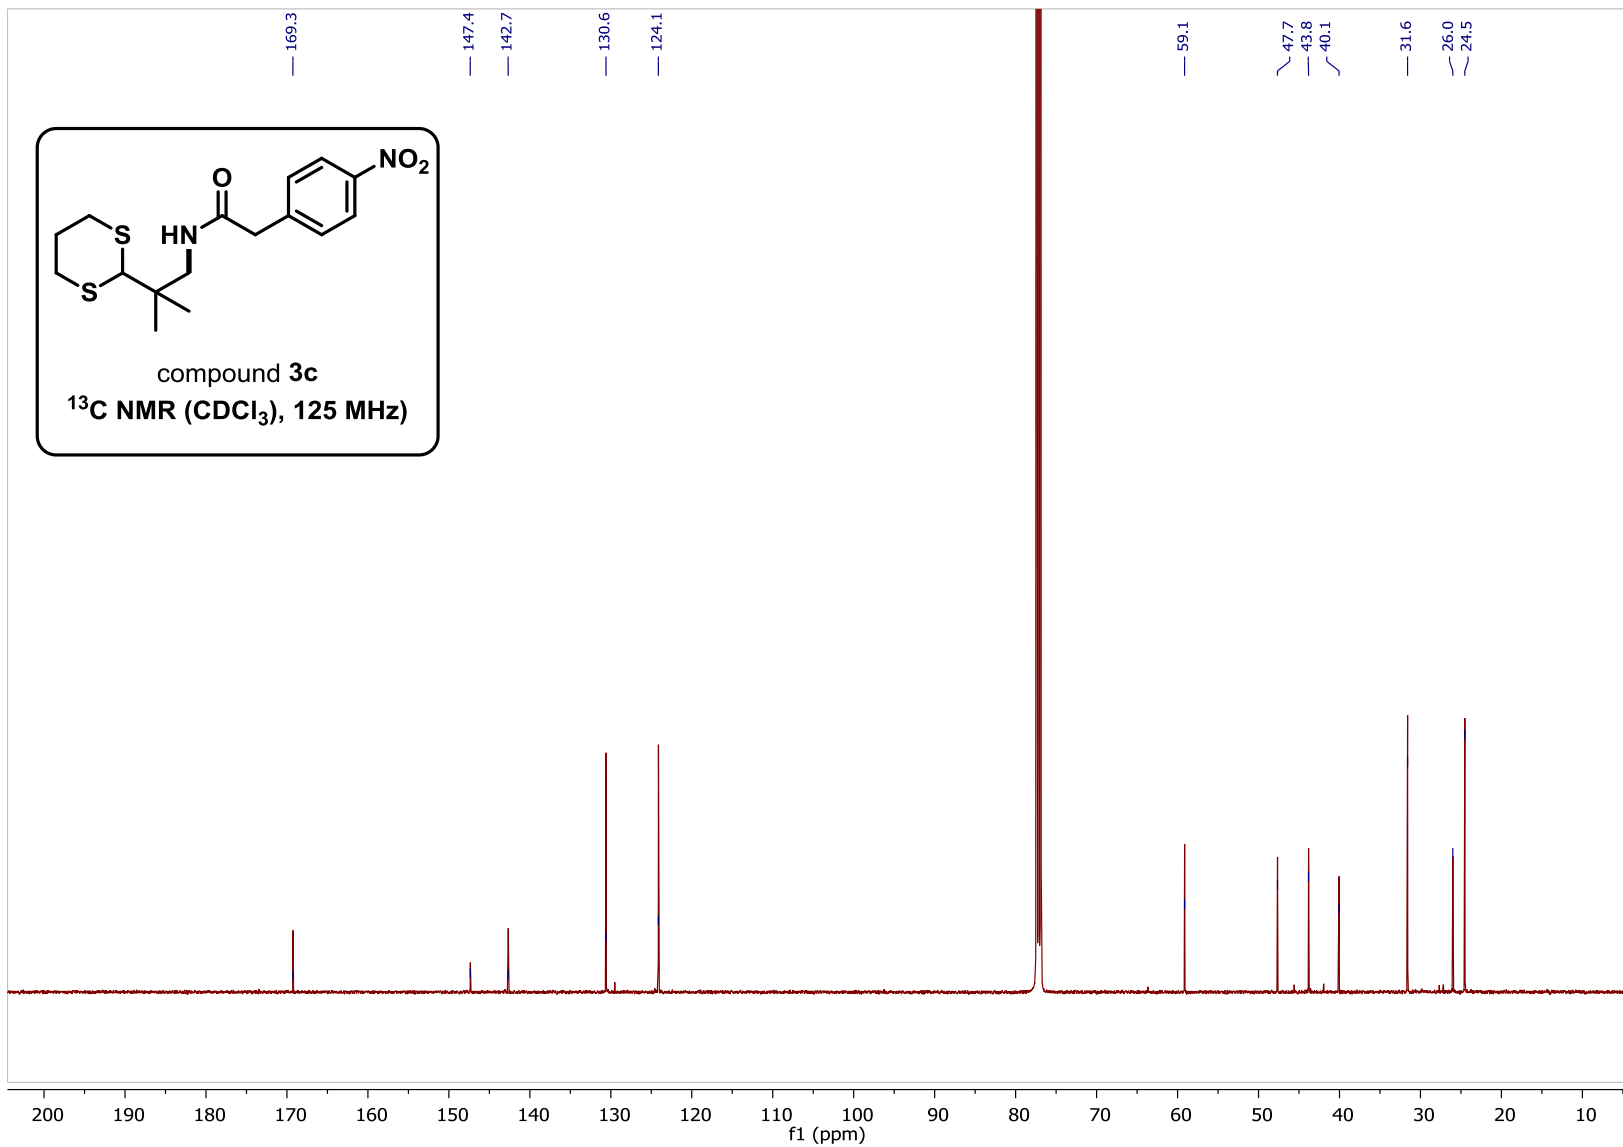

3.24. Compound 3d

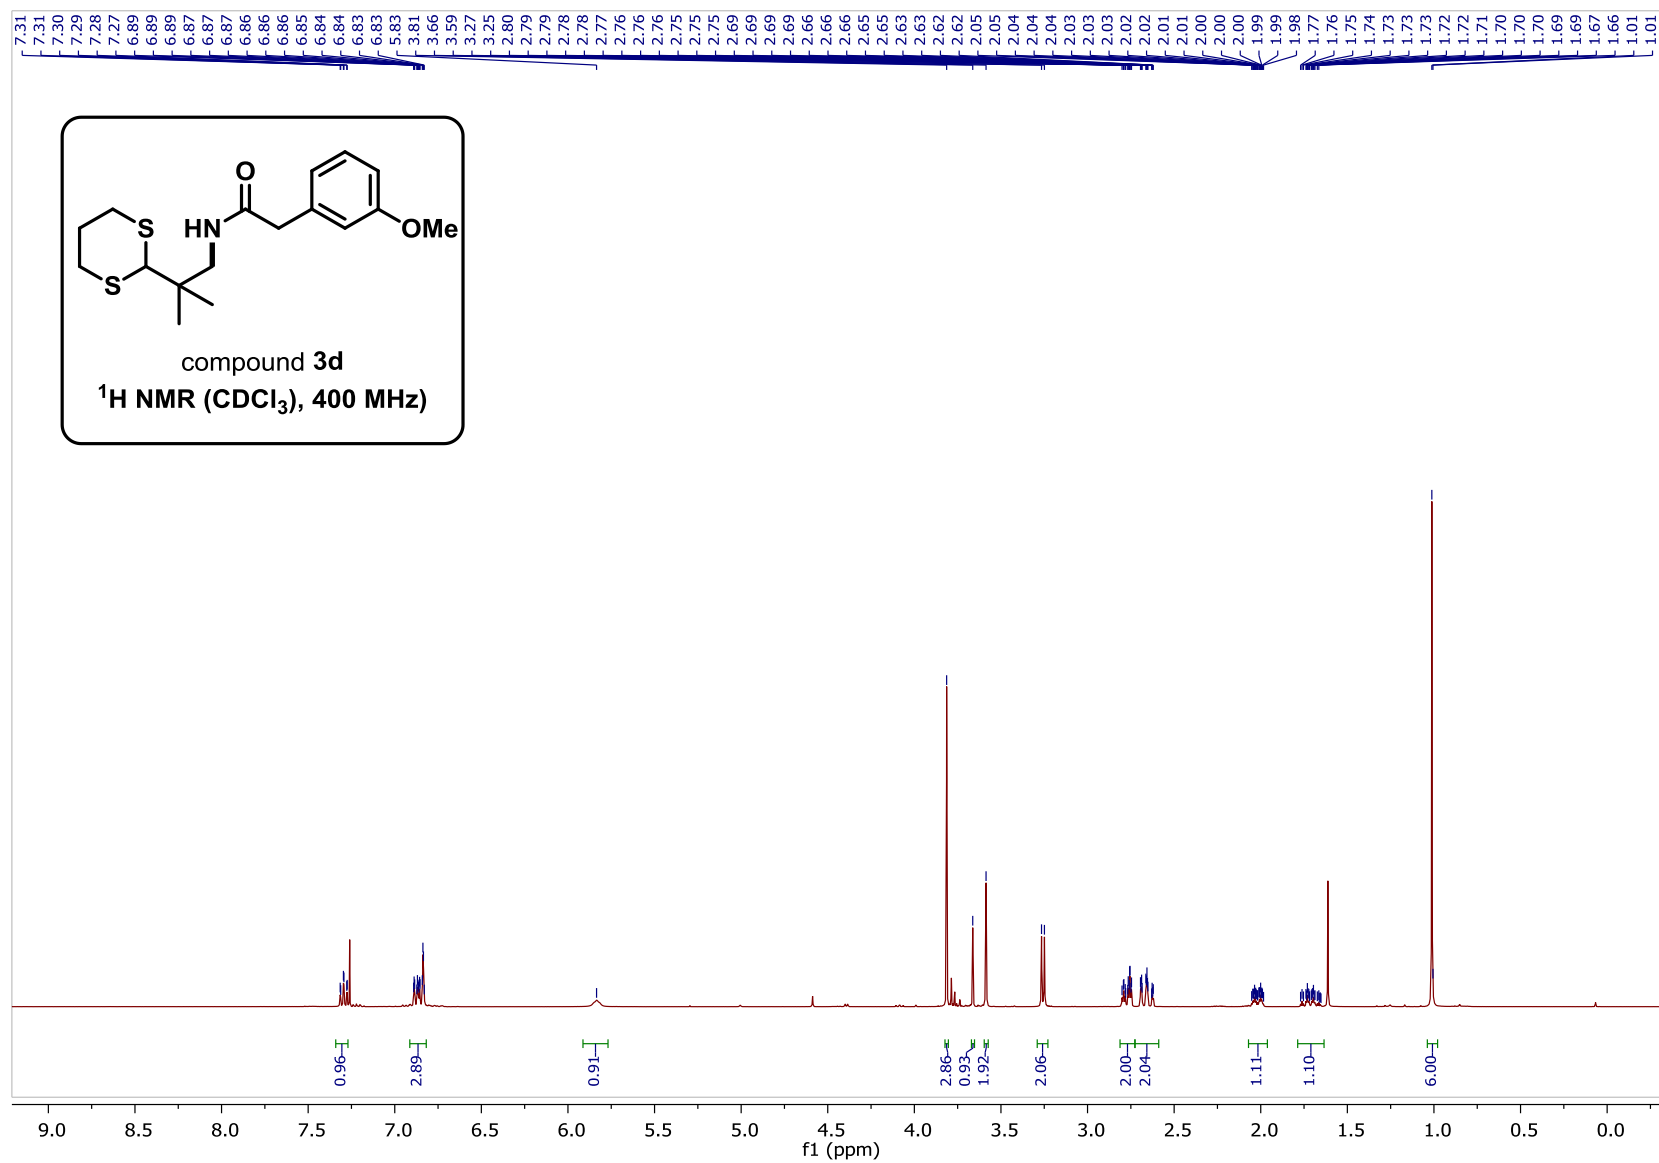

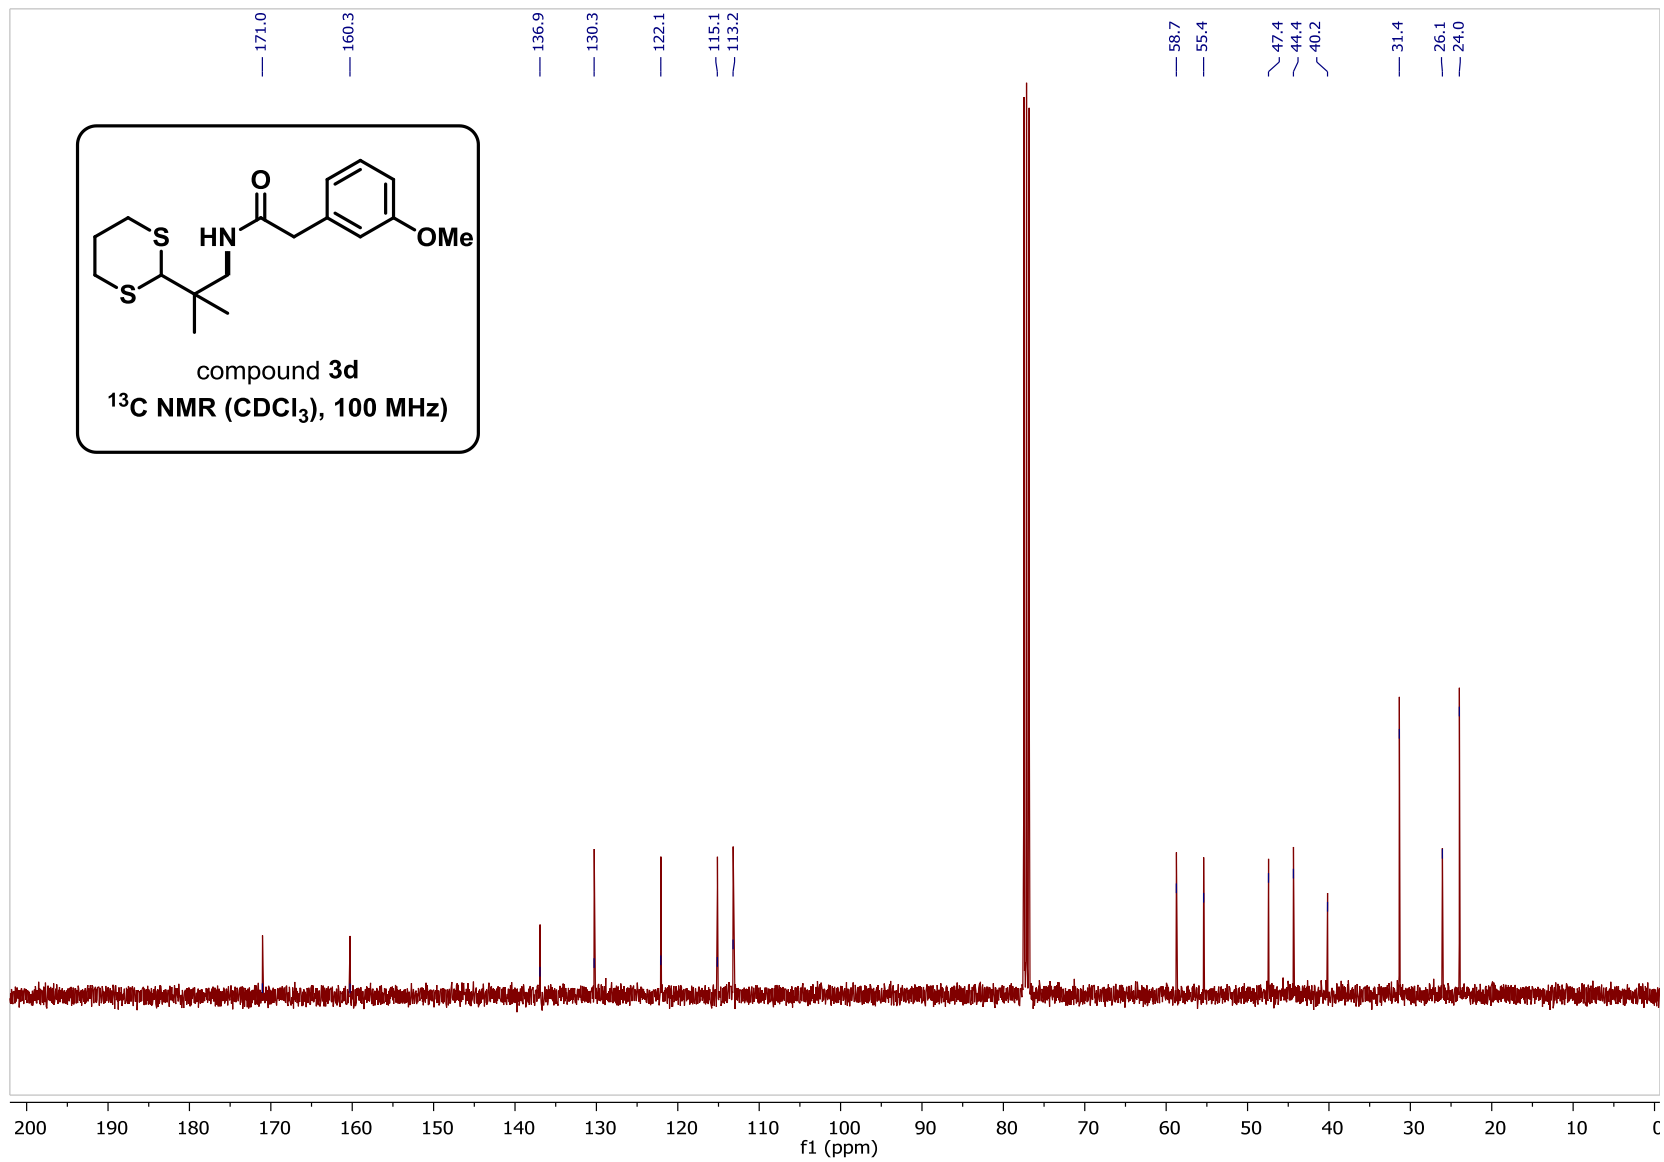

3.25. Compound 3e

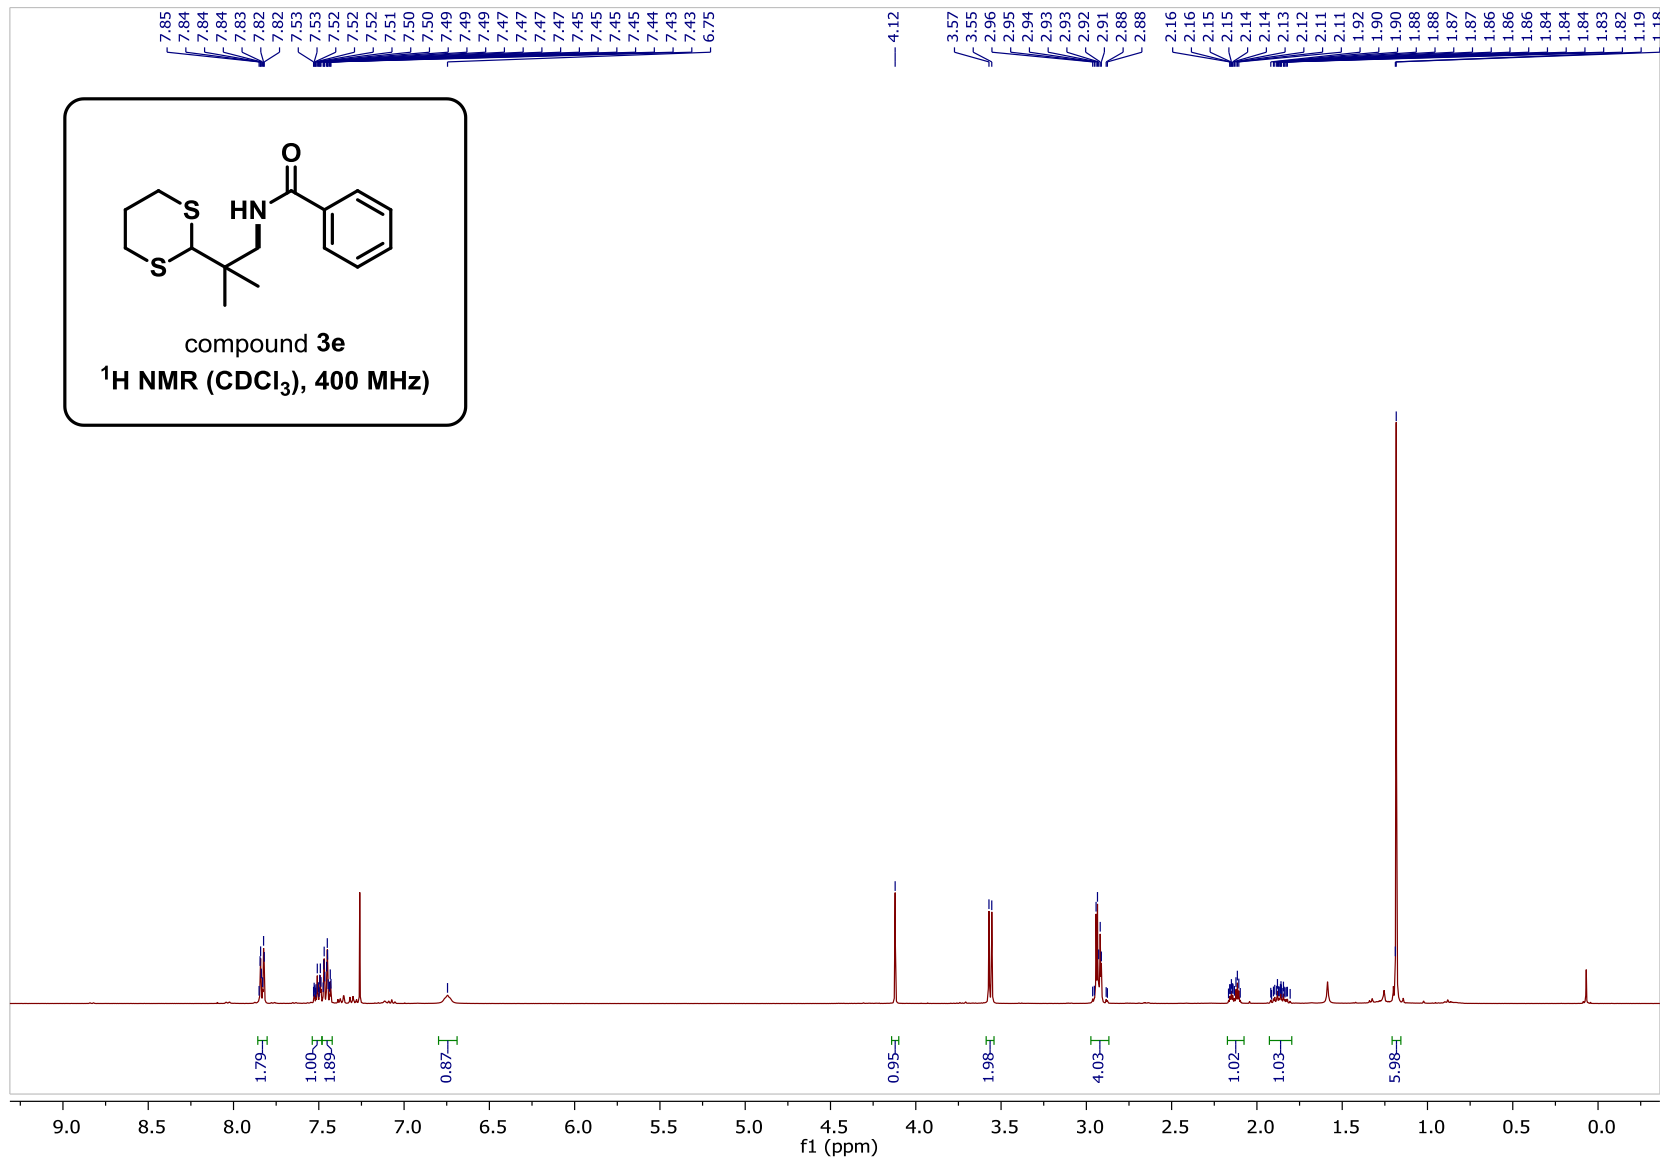

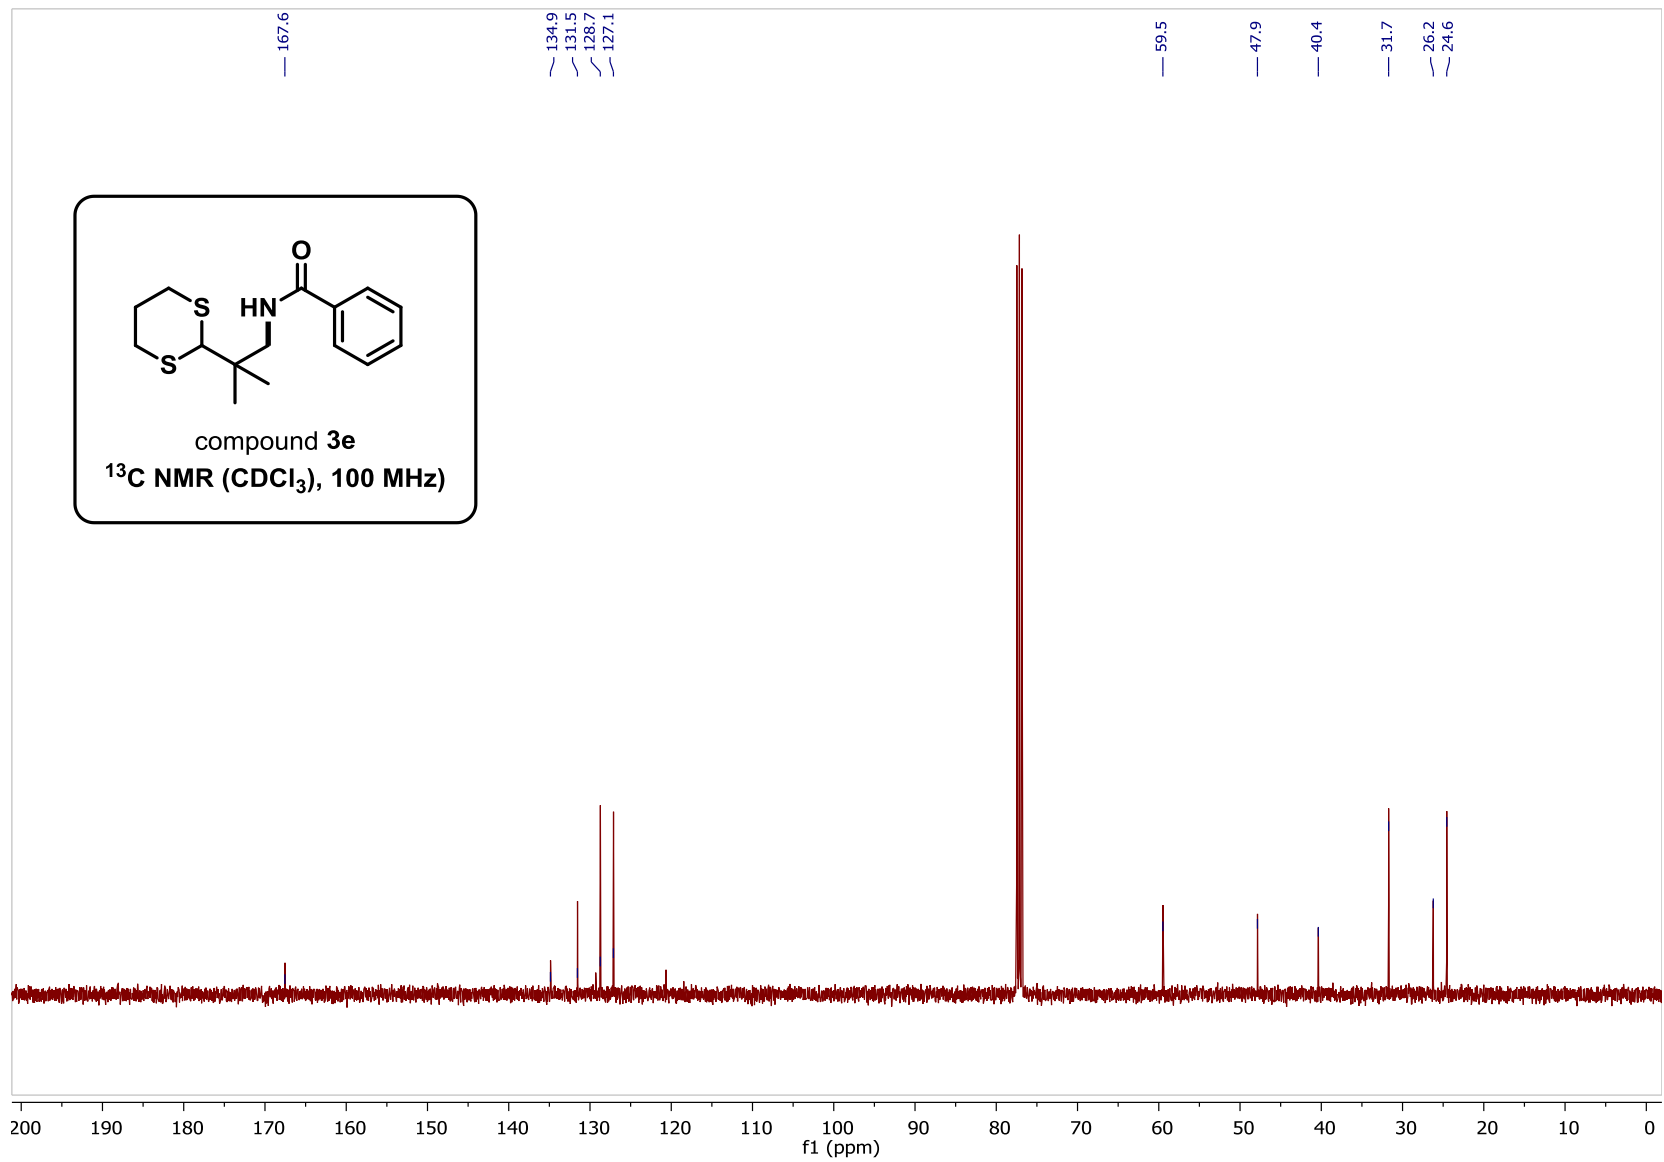

3.26. Compound 3f

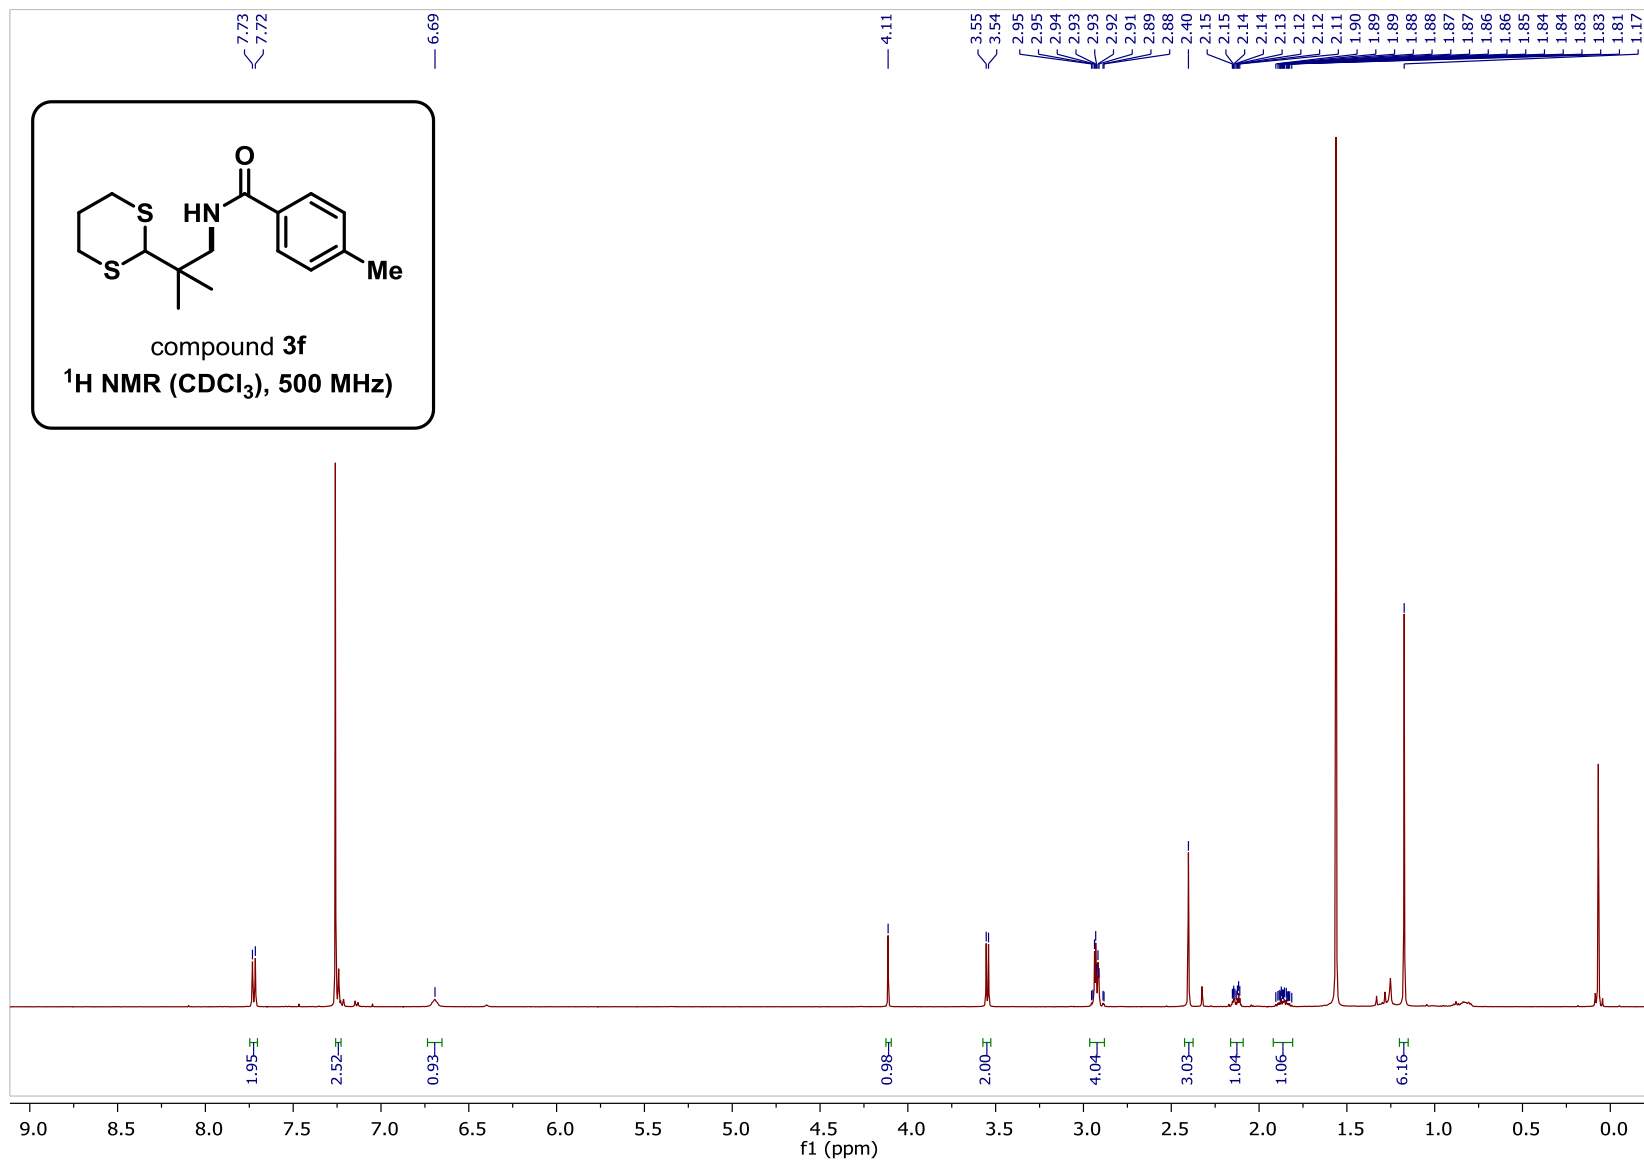

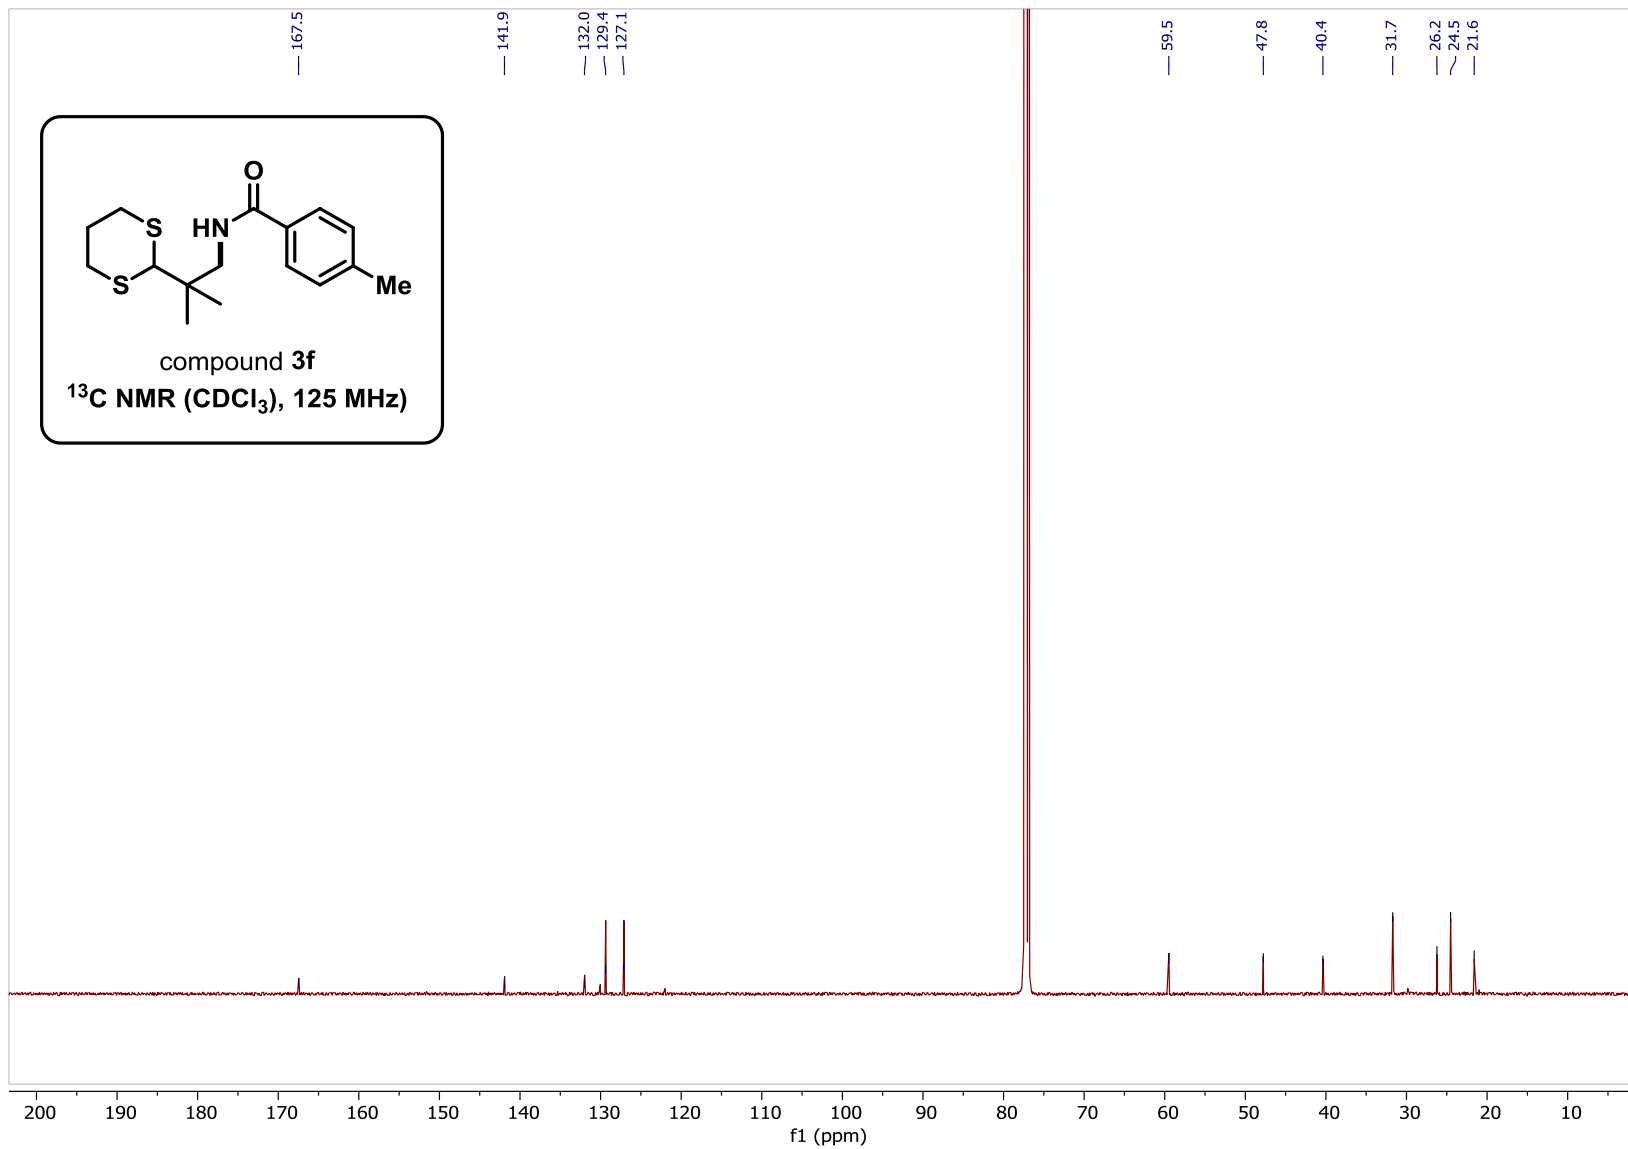



3.27. Compound 3g

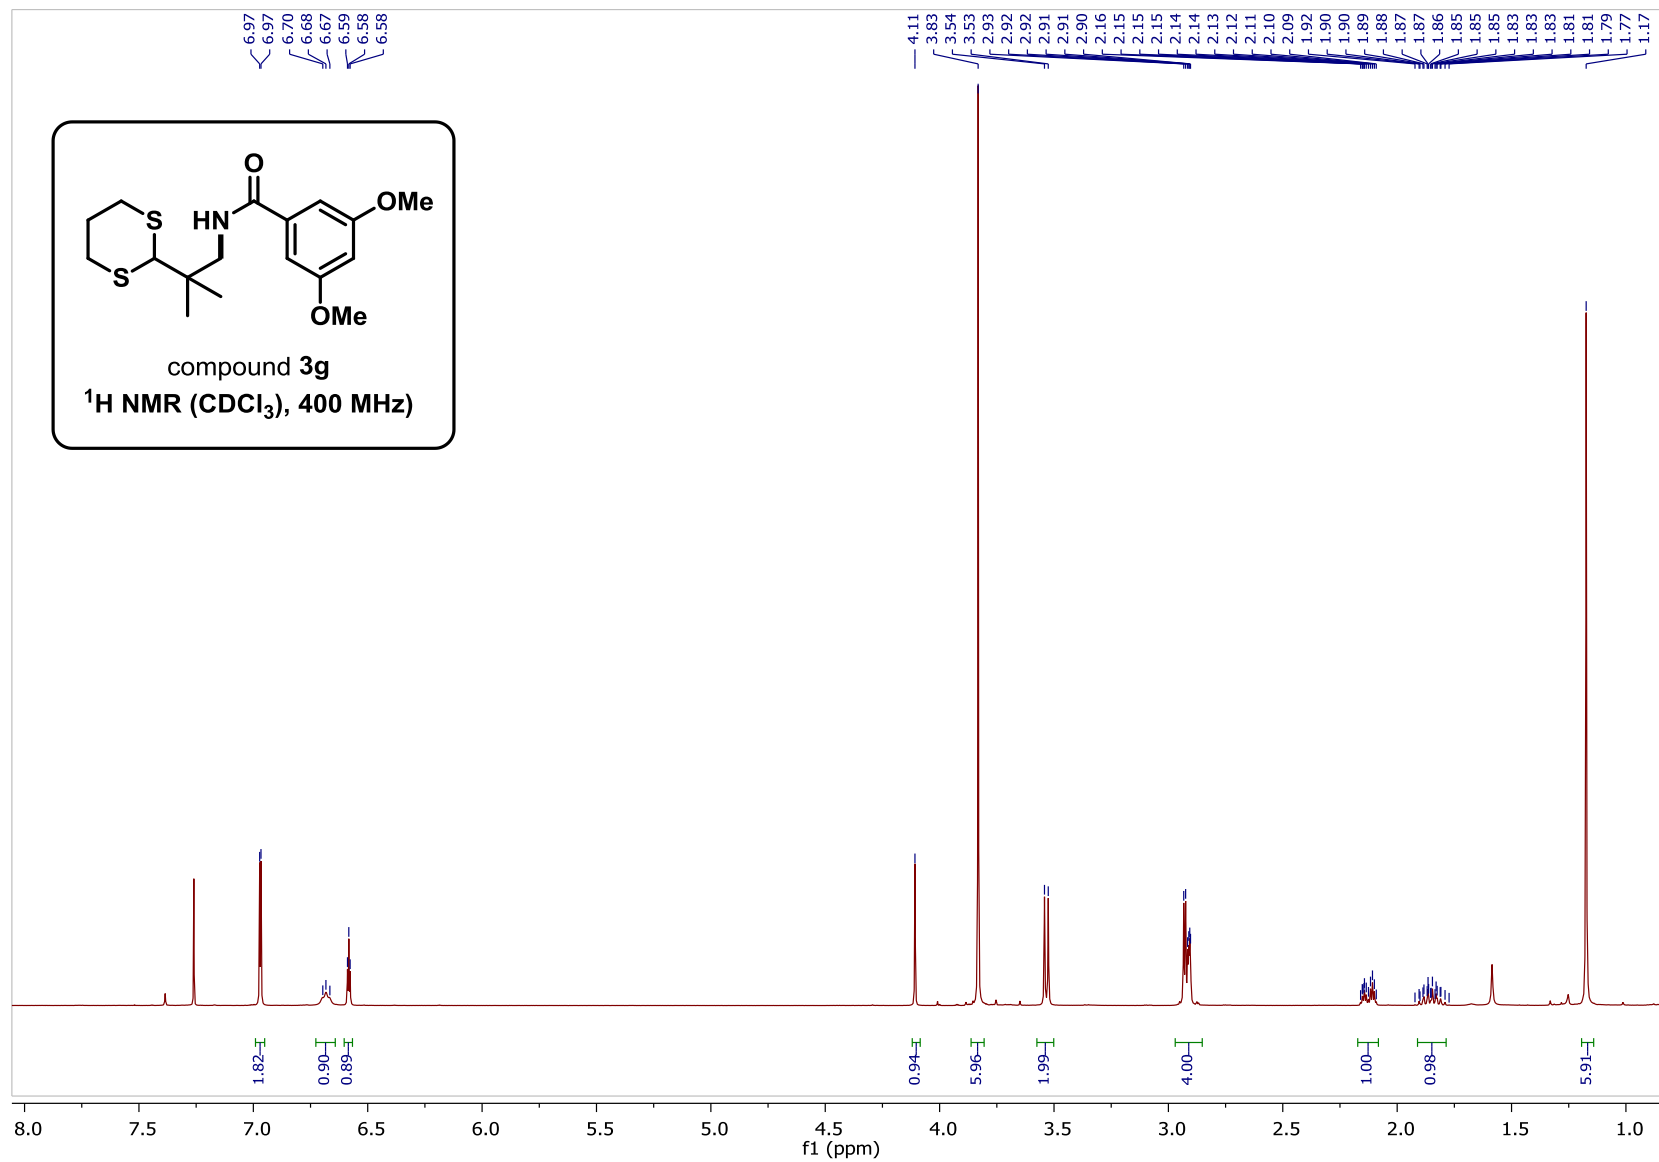

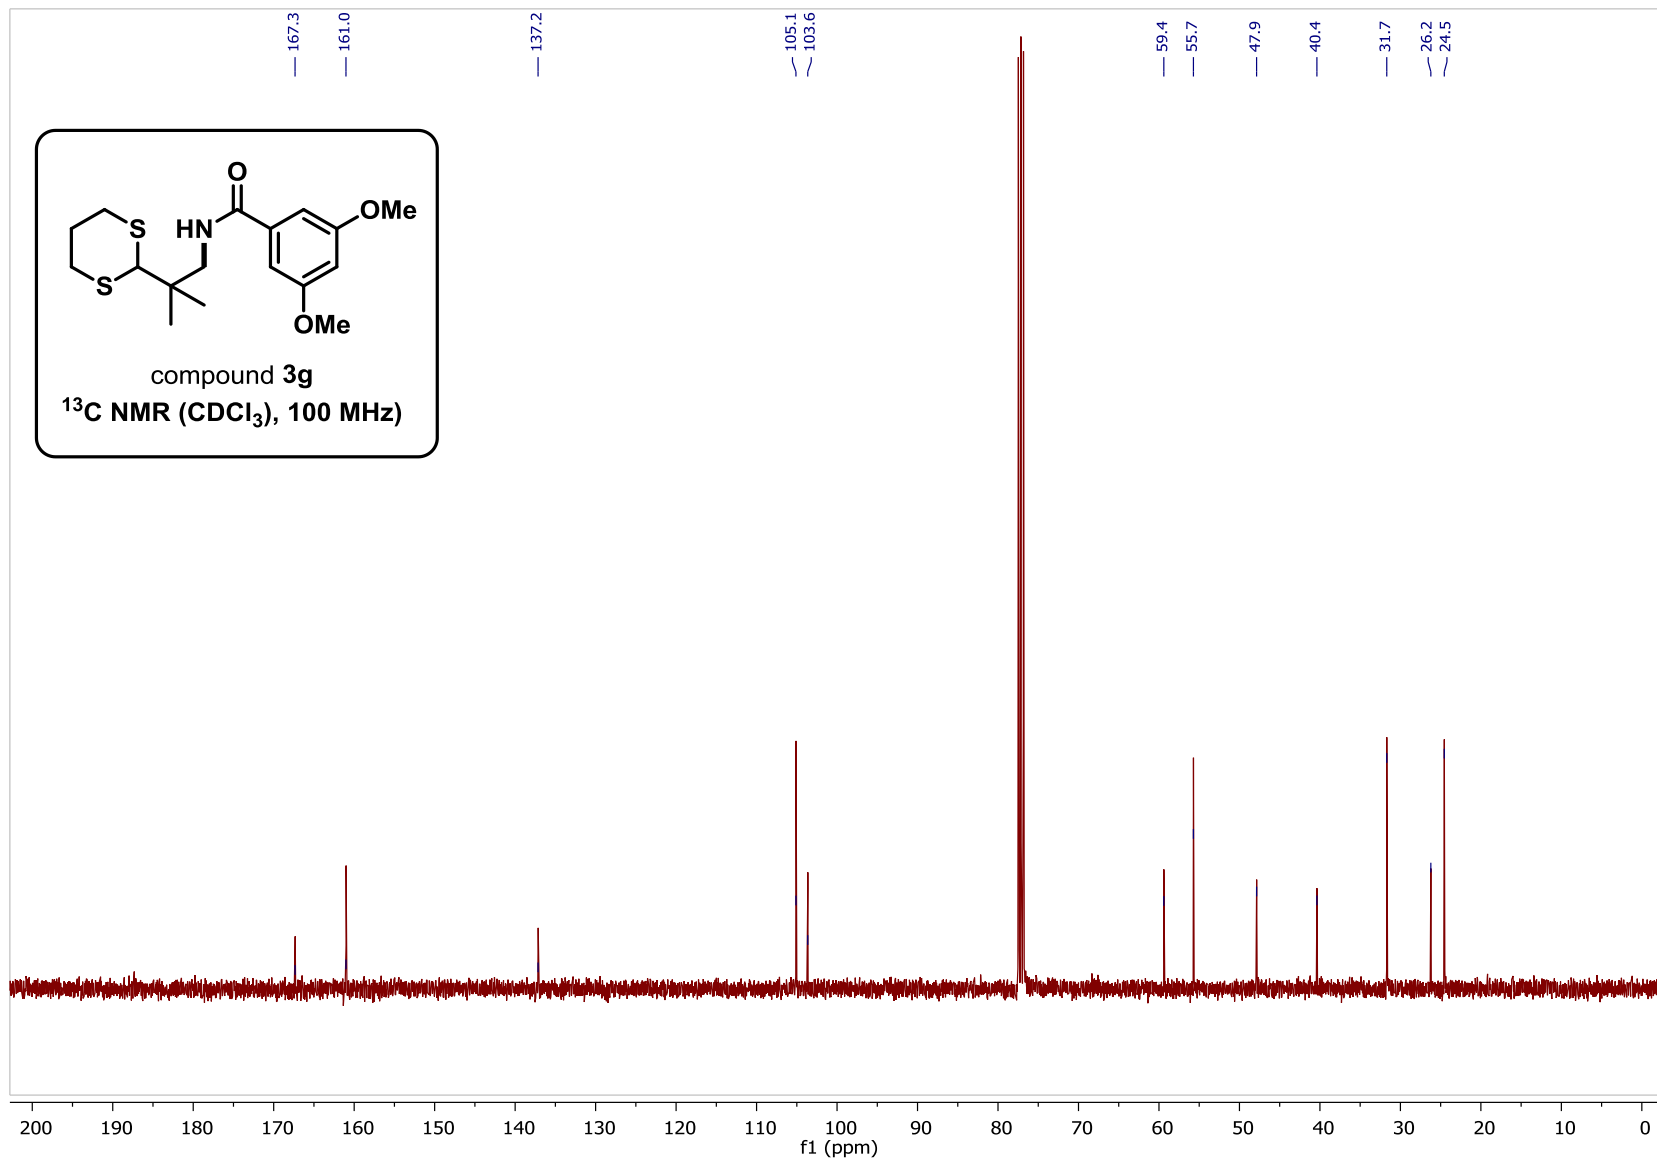

3.28. Compound 3h

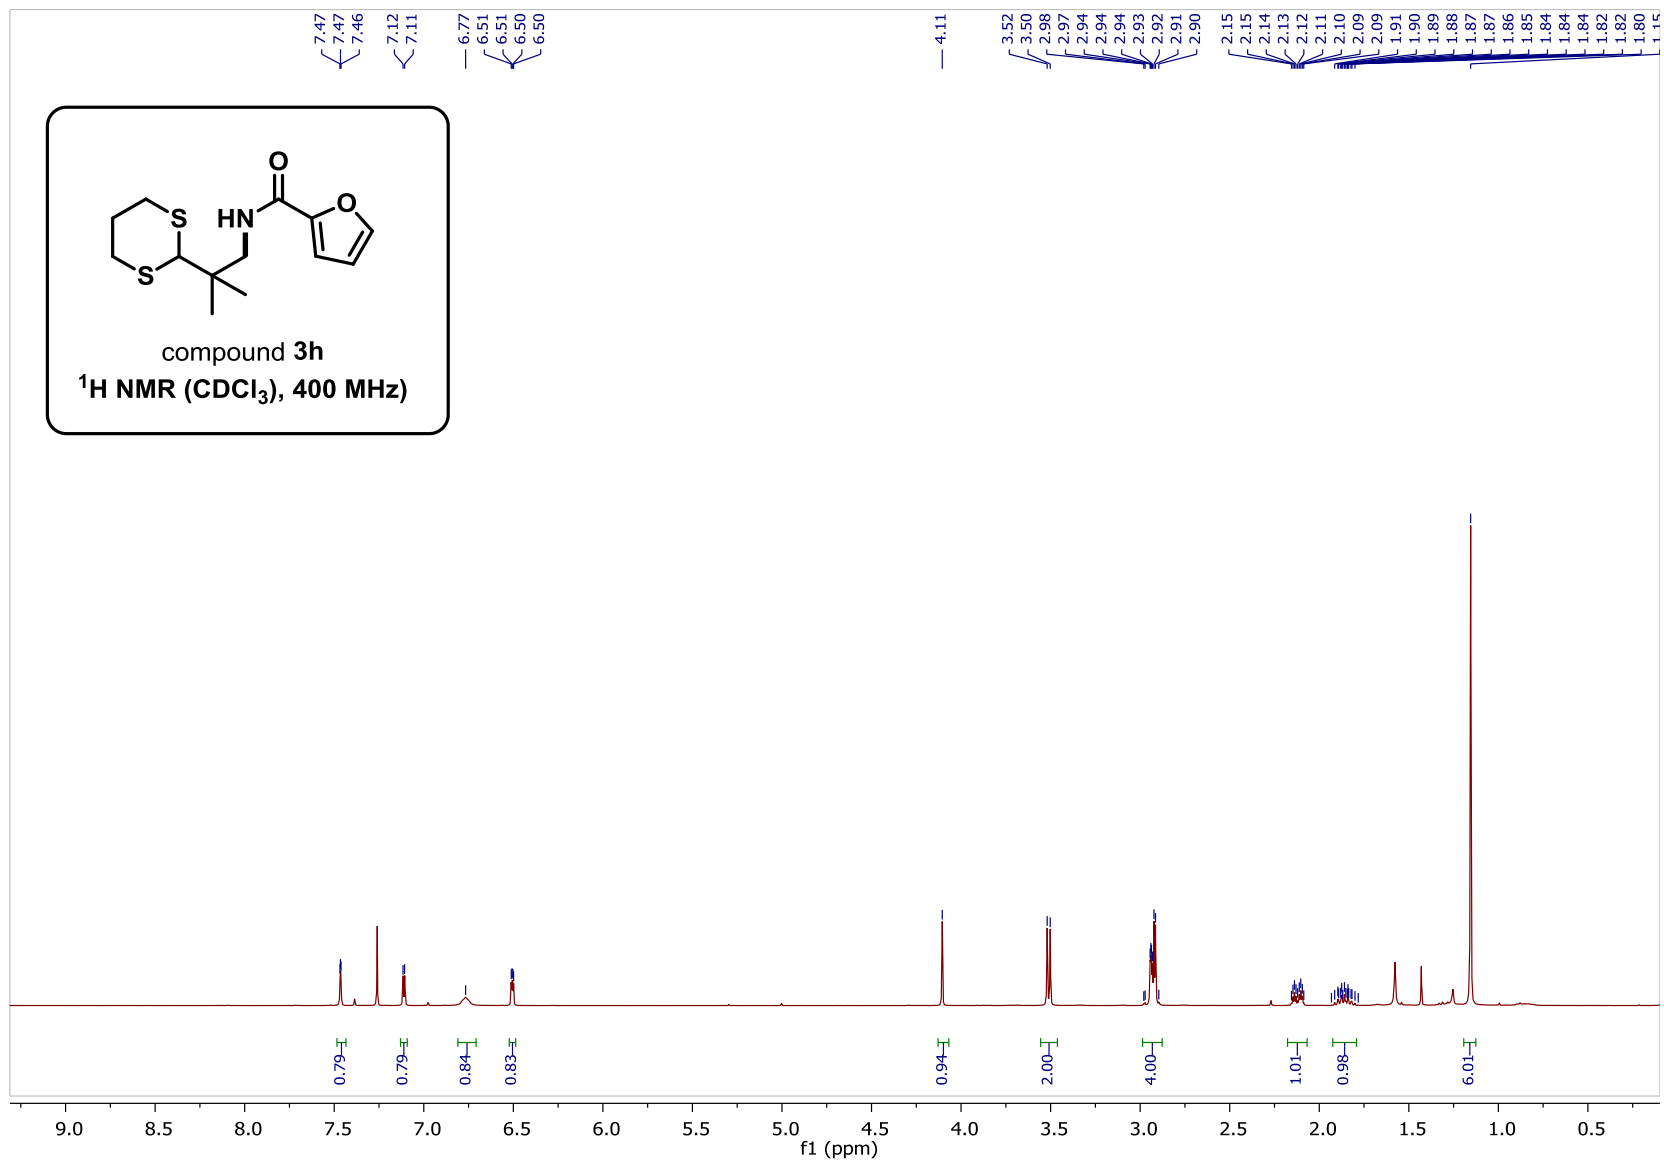

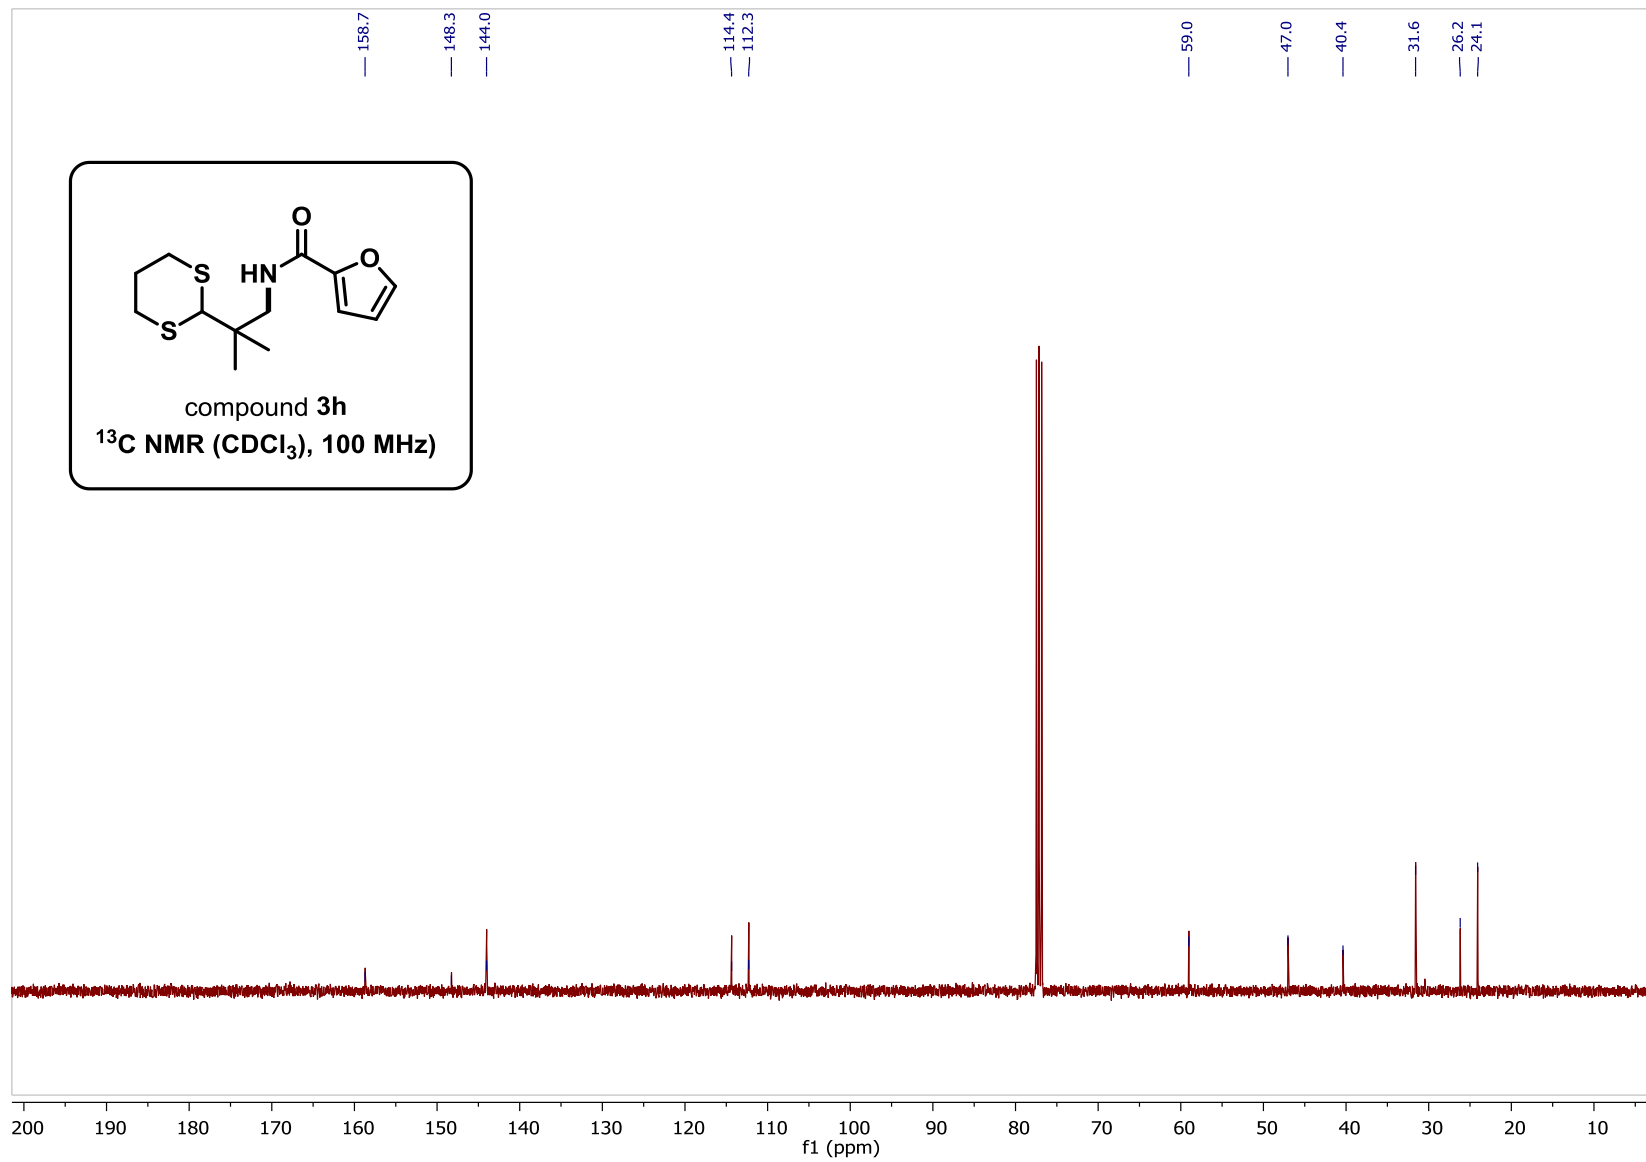

3.29. Compound 3i

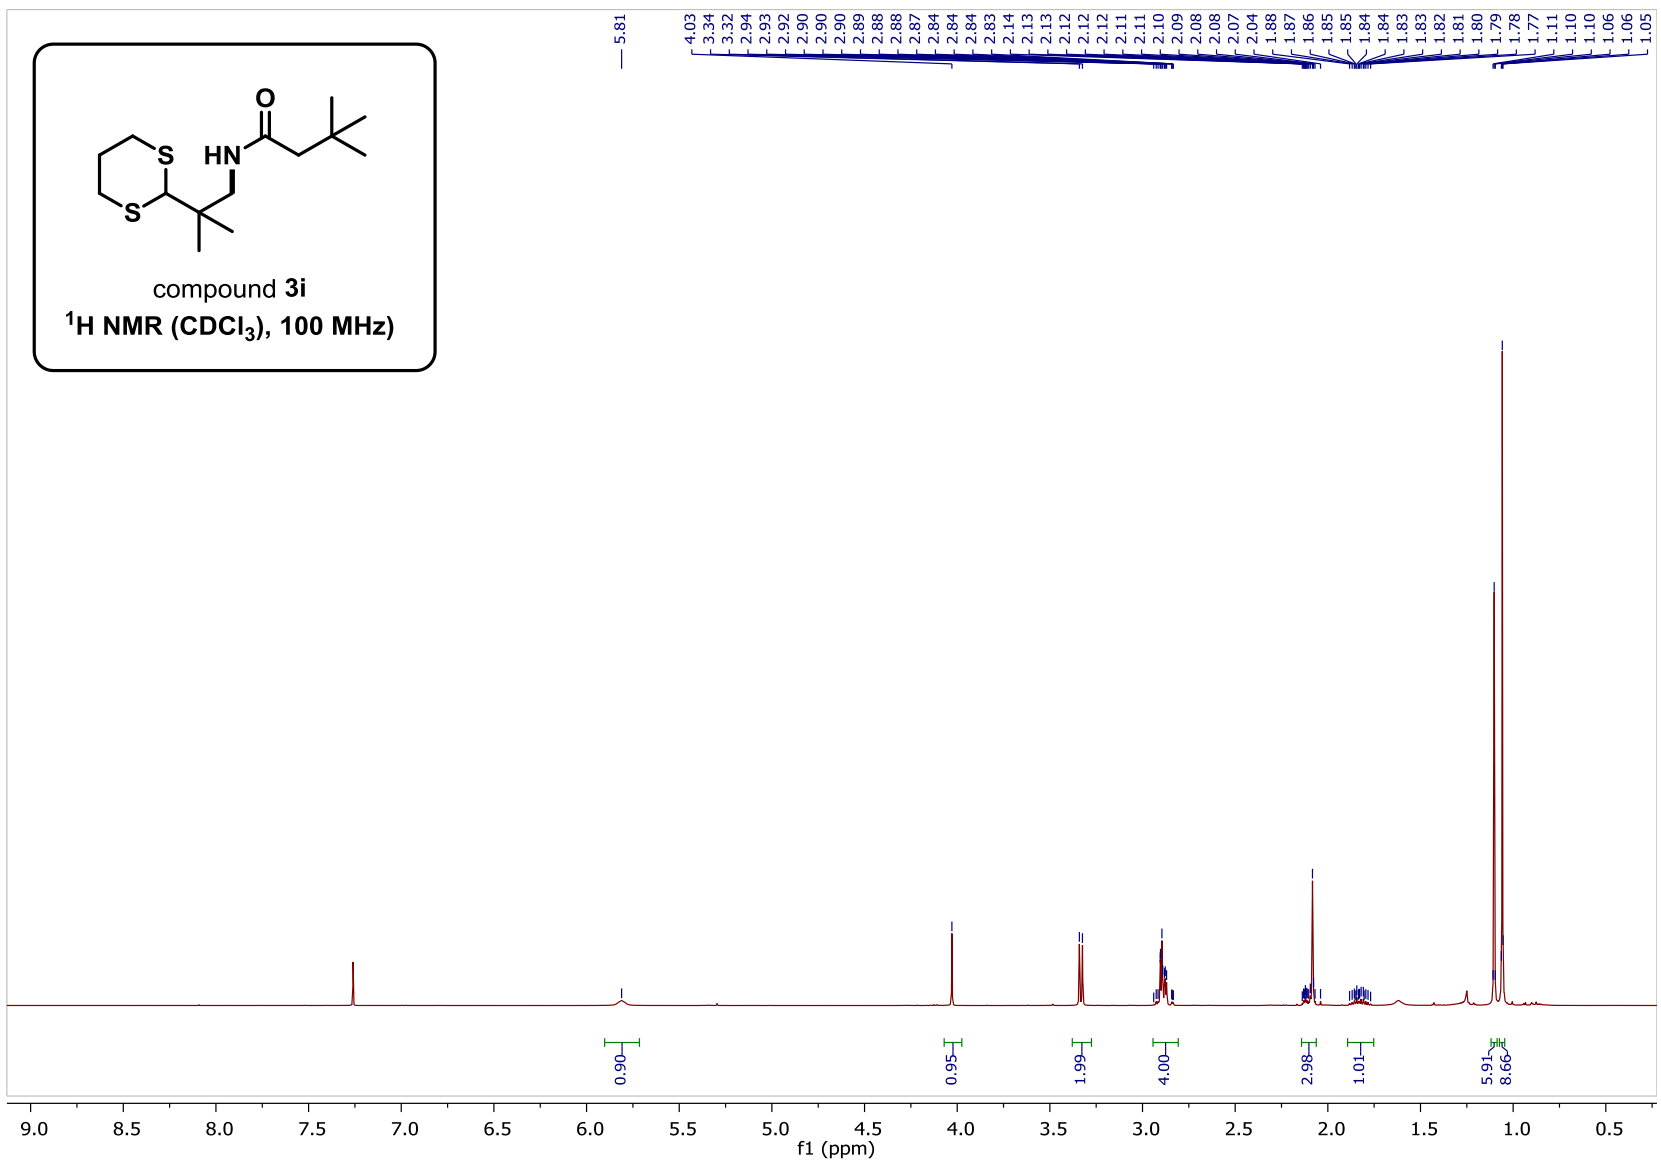

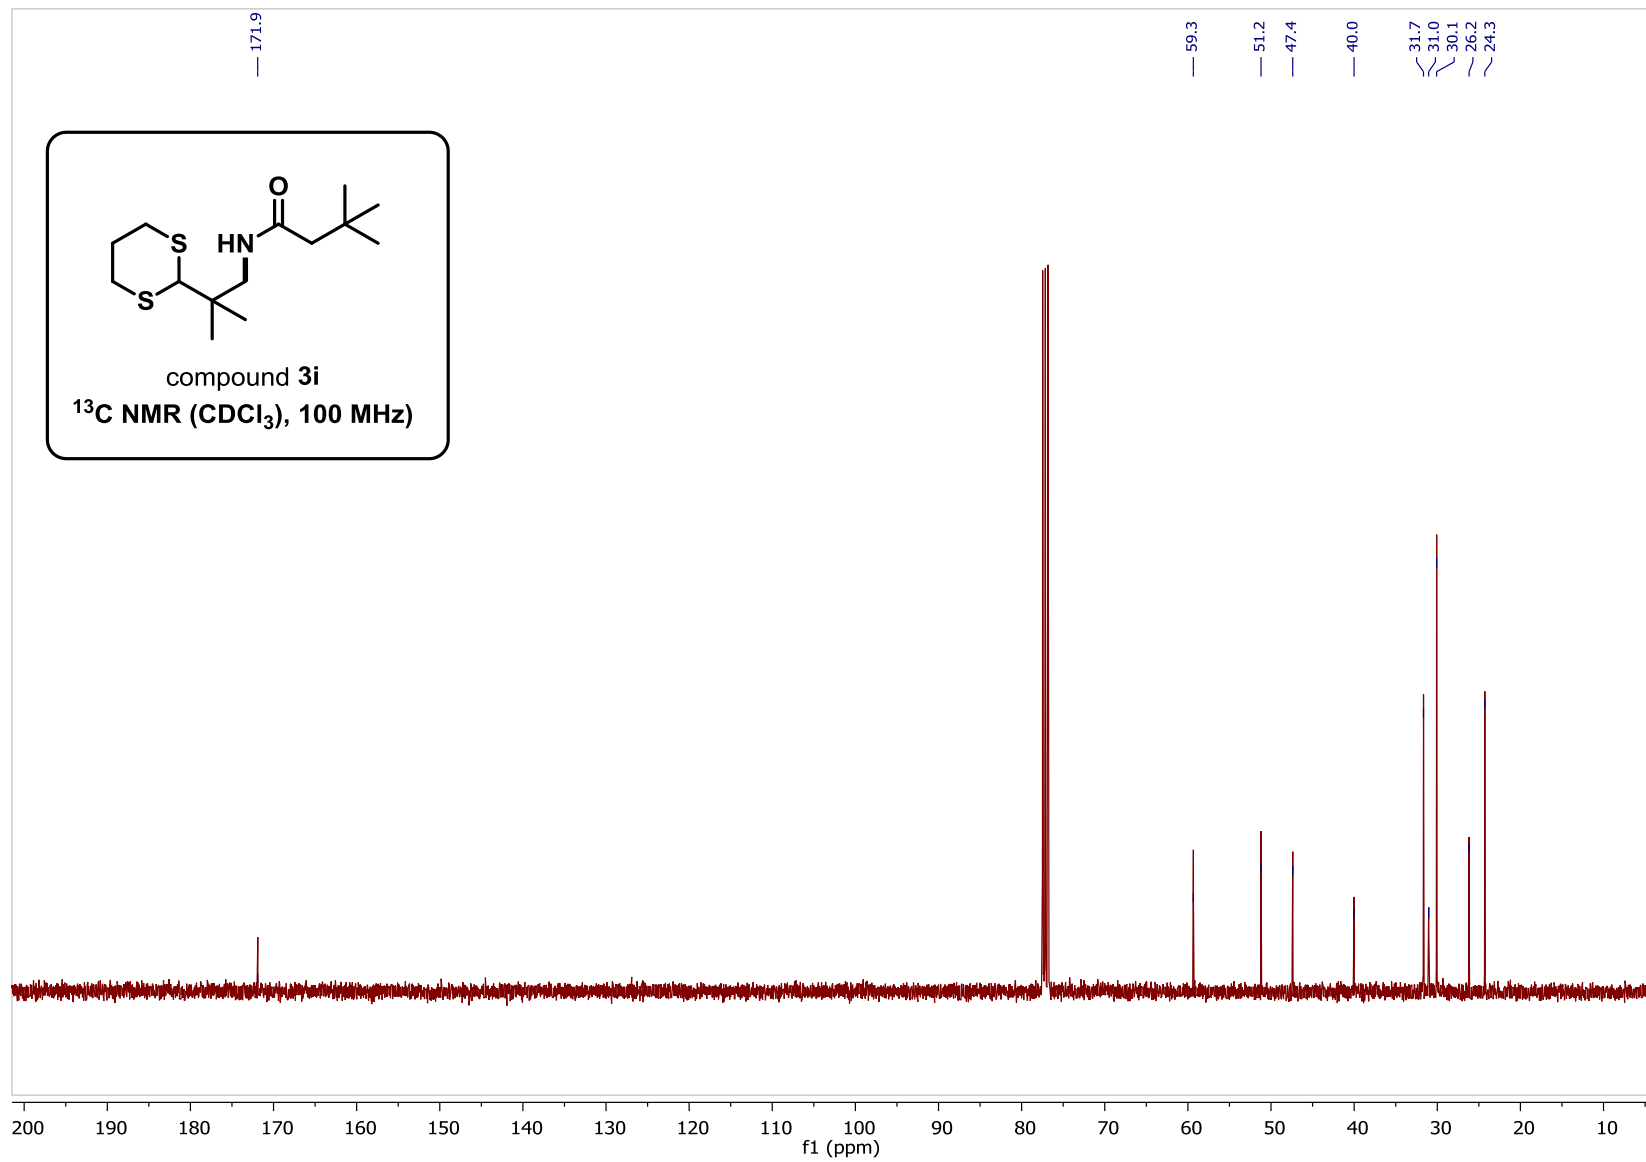

3.30. Compound 3j

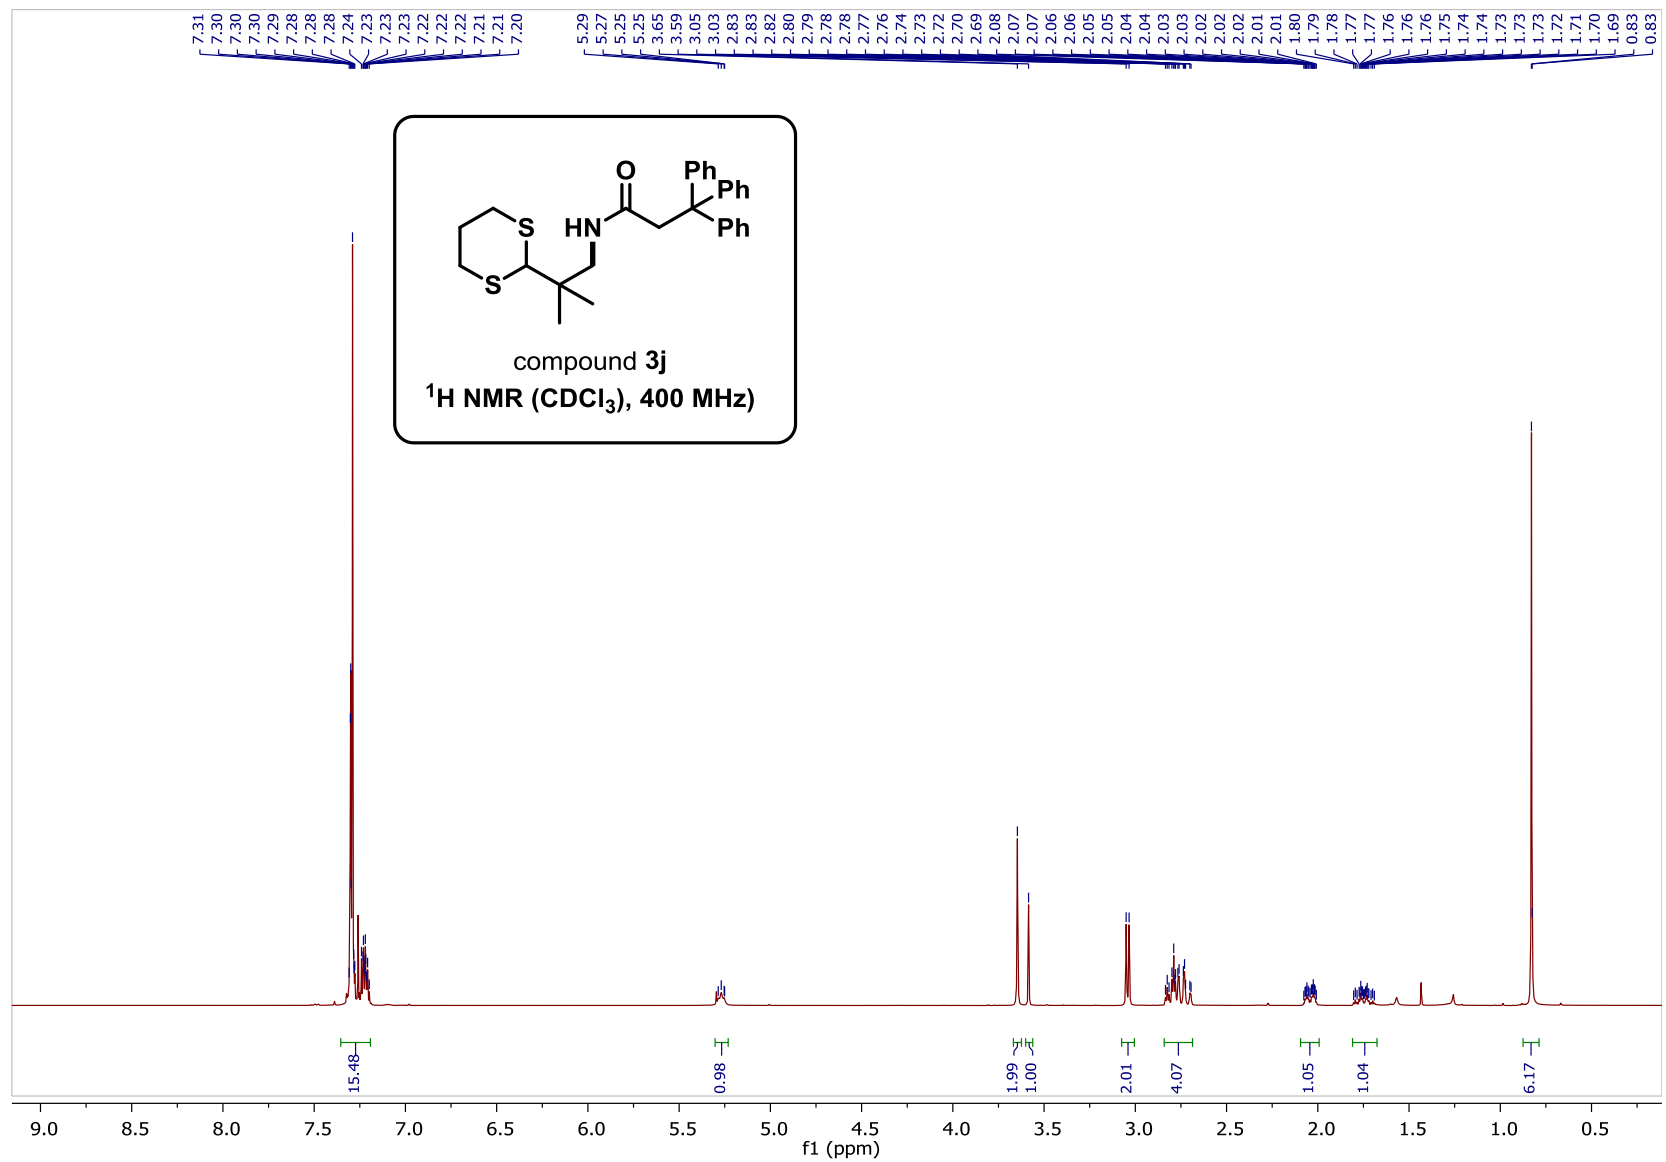

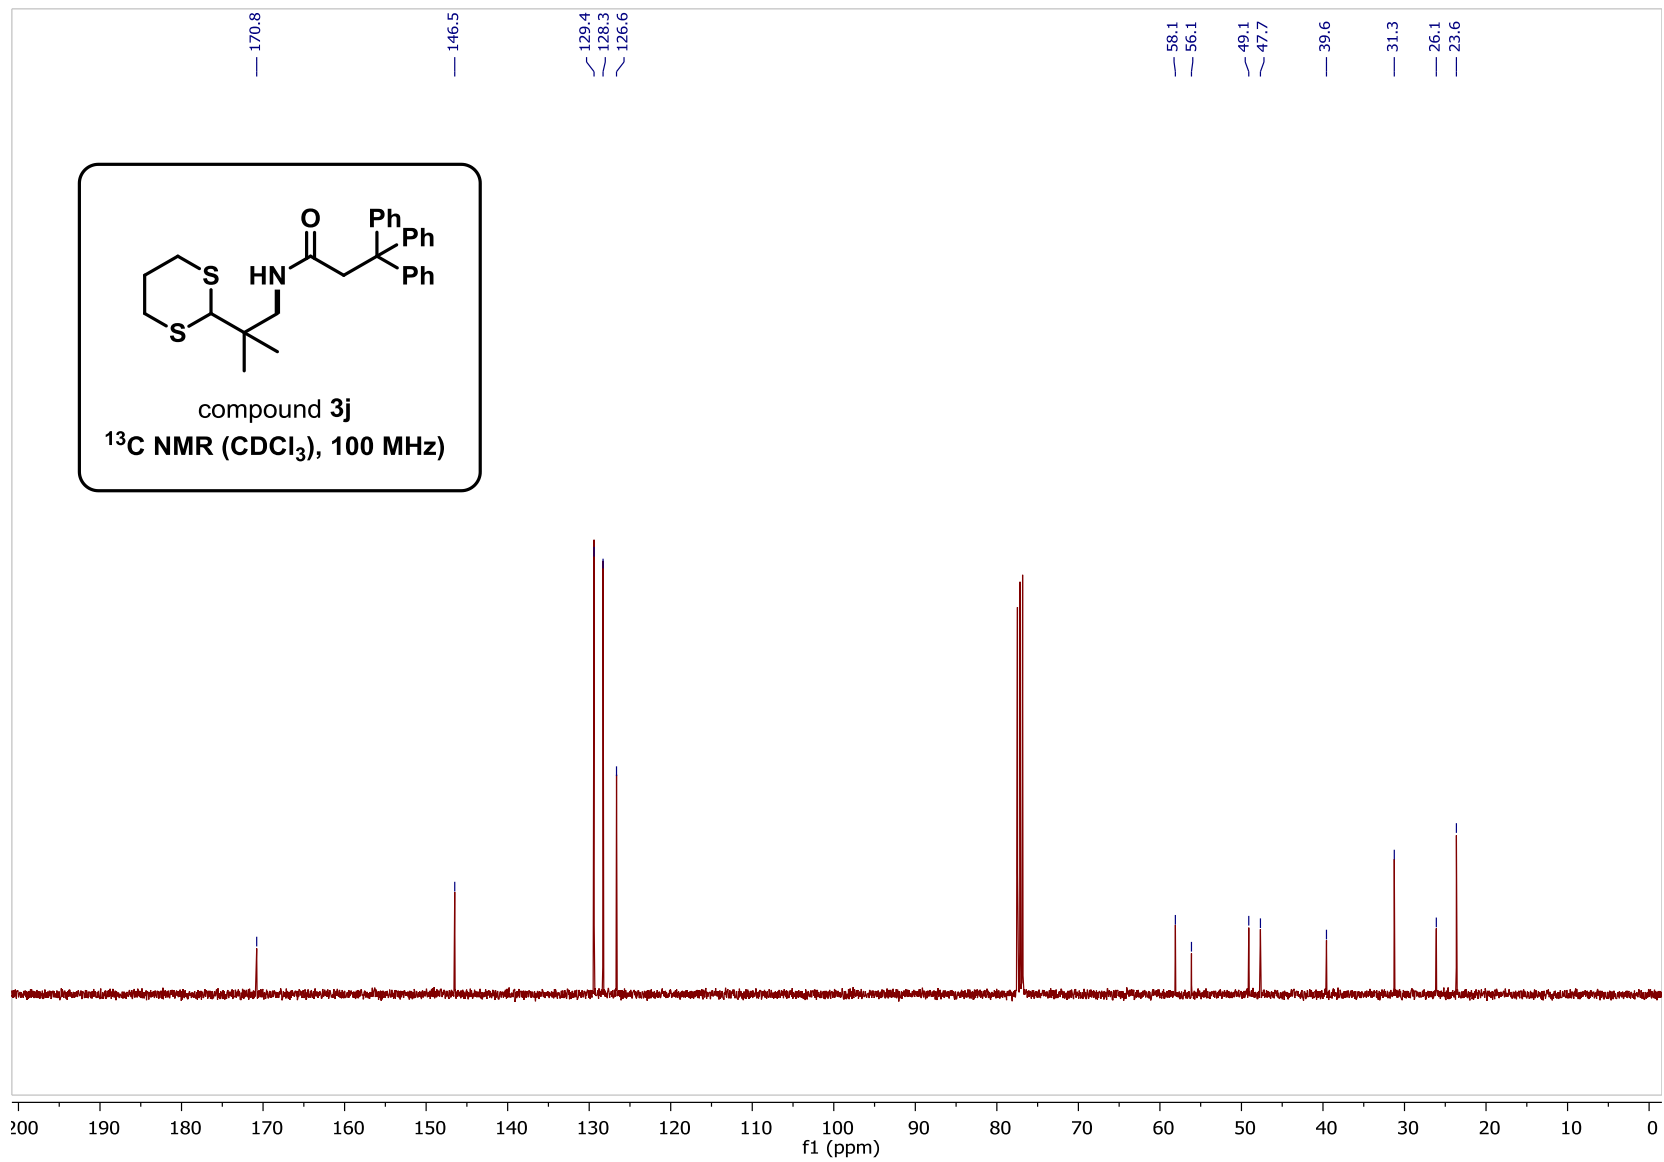



3.31. Compound 3k

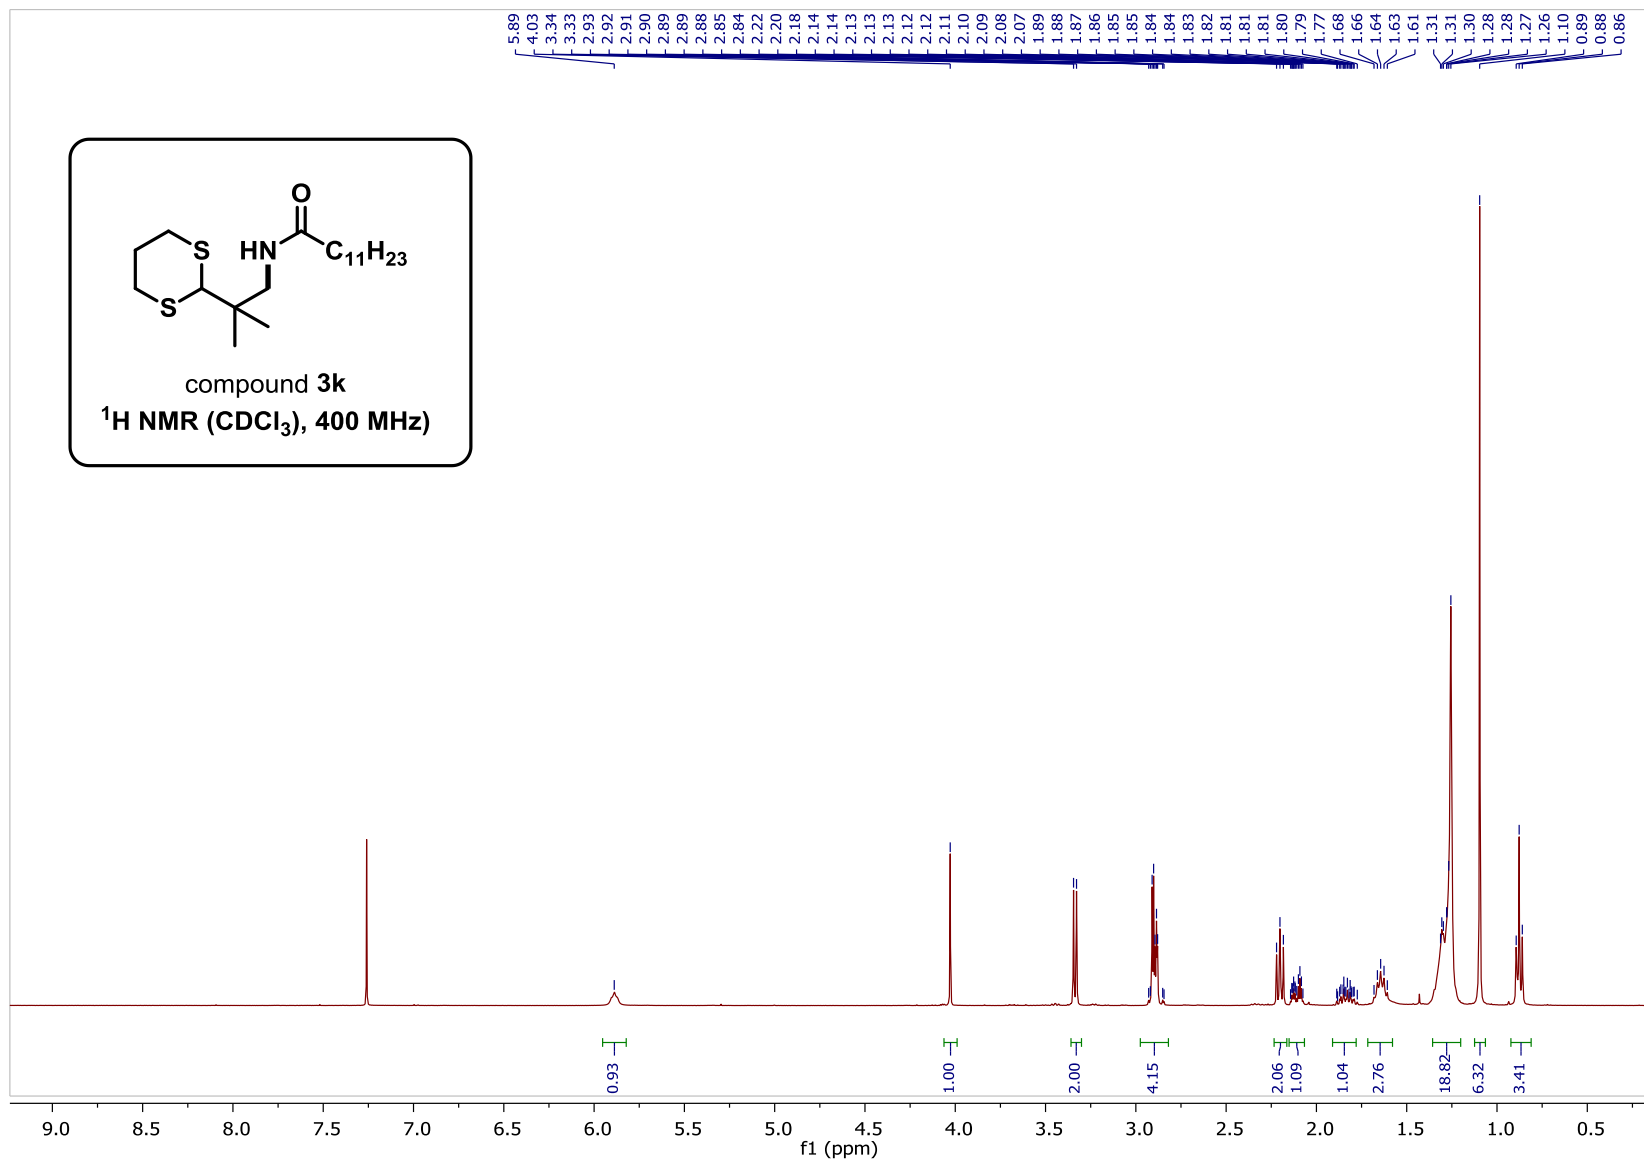

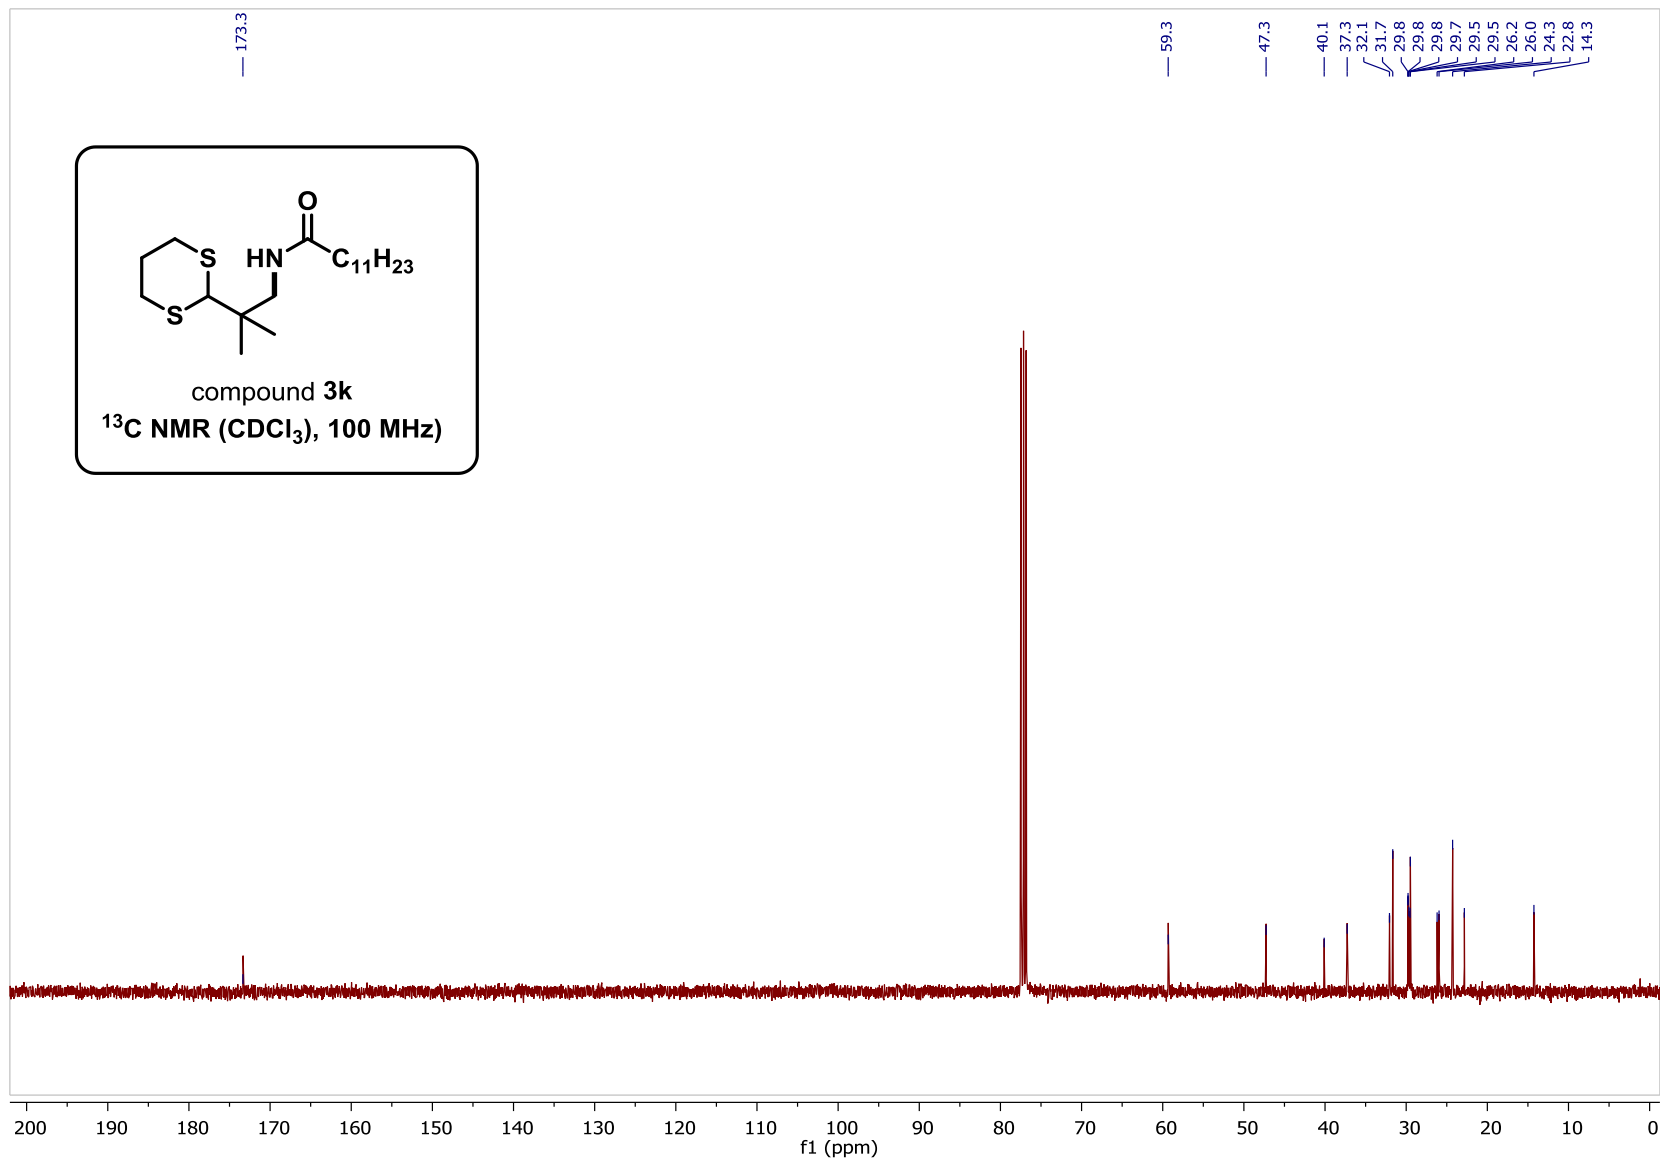

3.32. Compound 3l

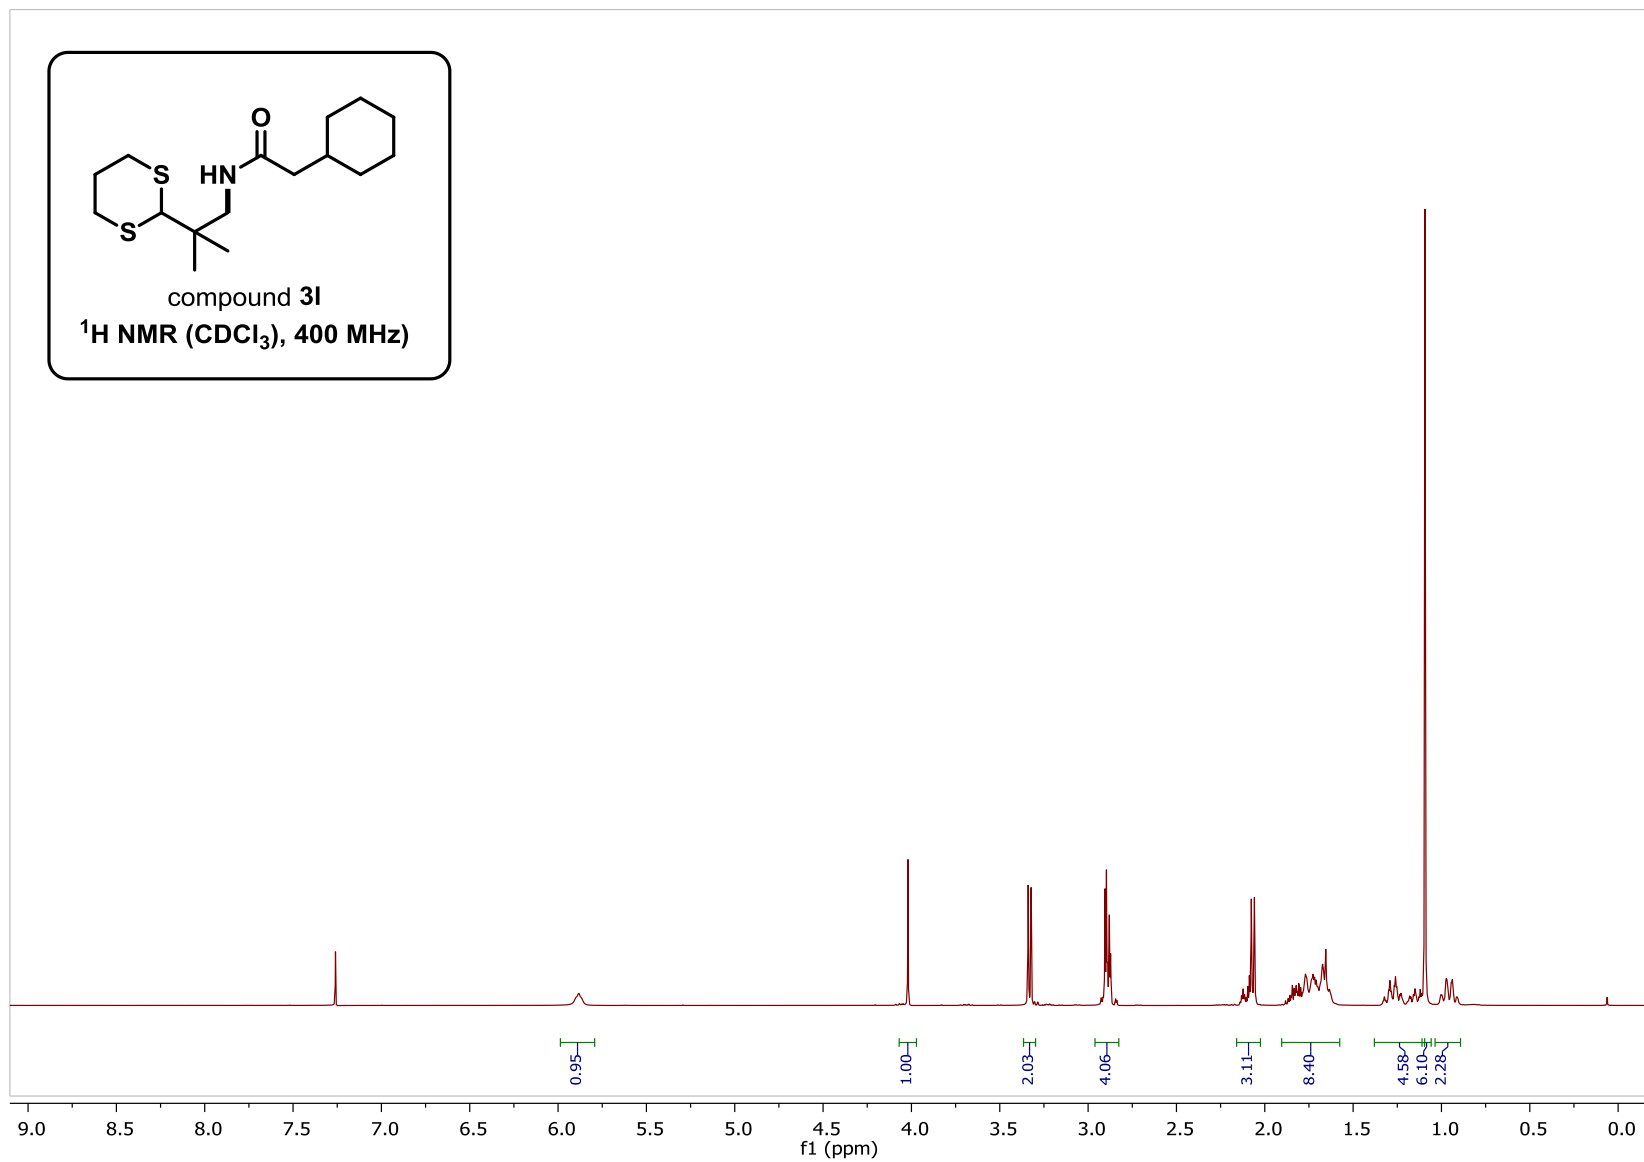

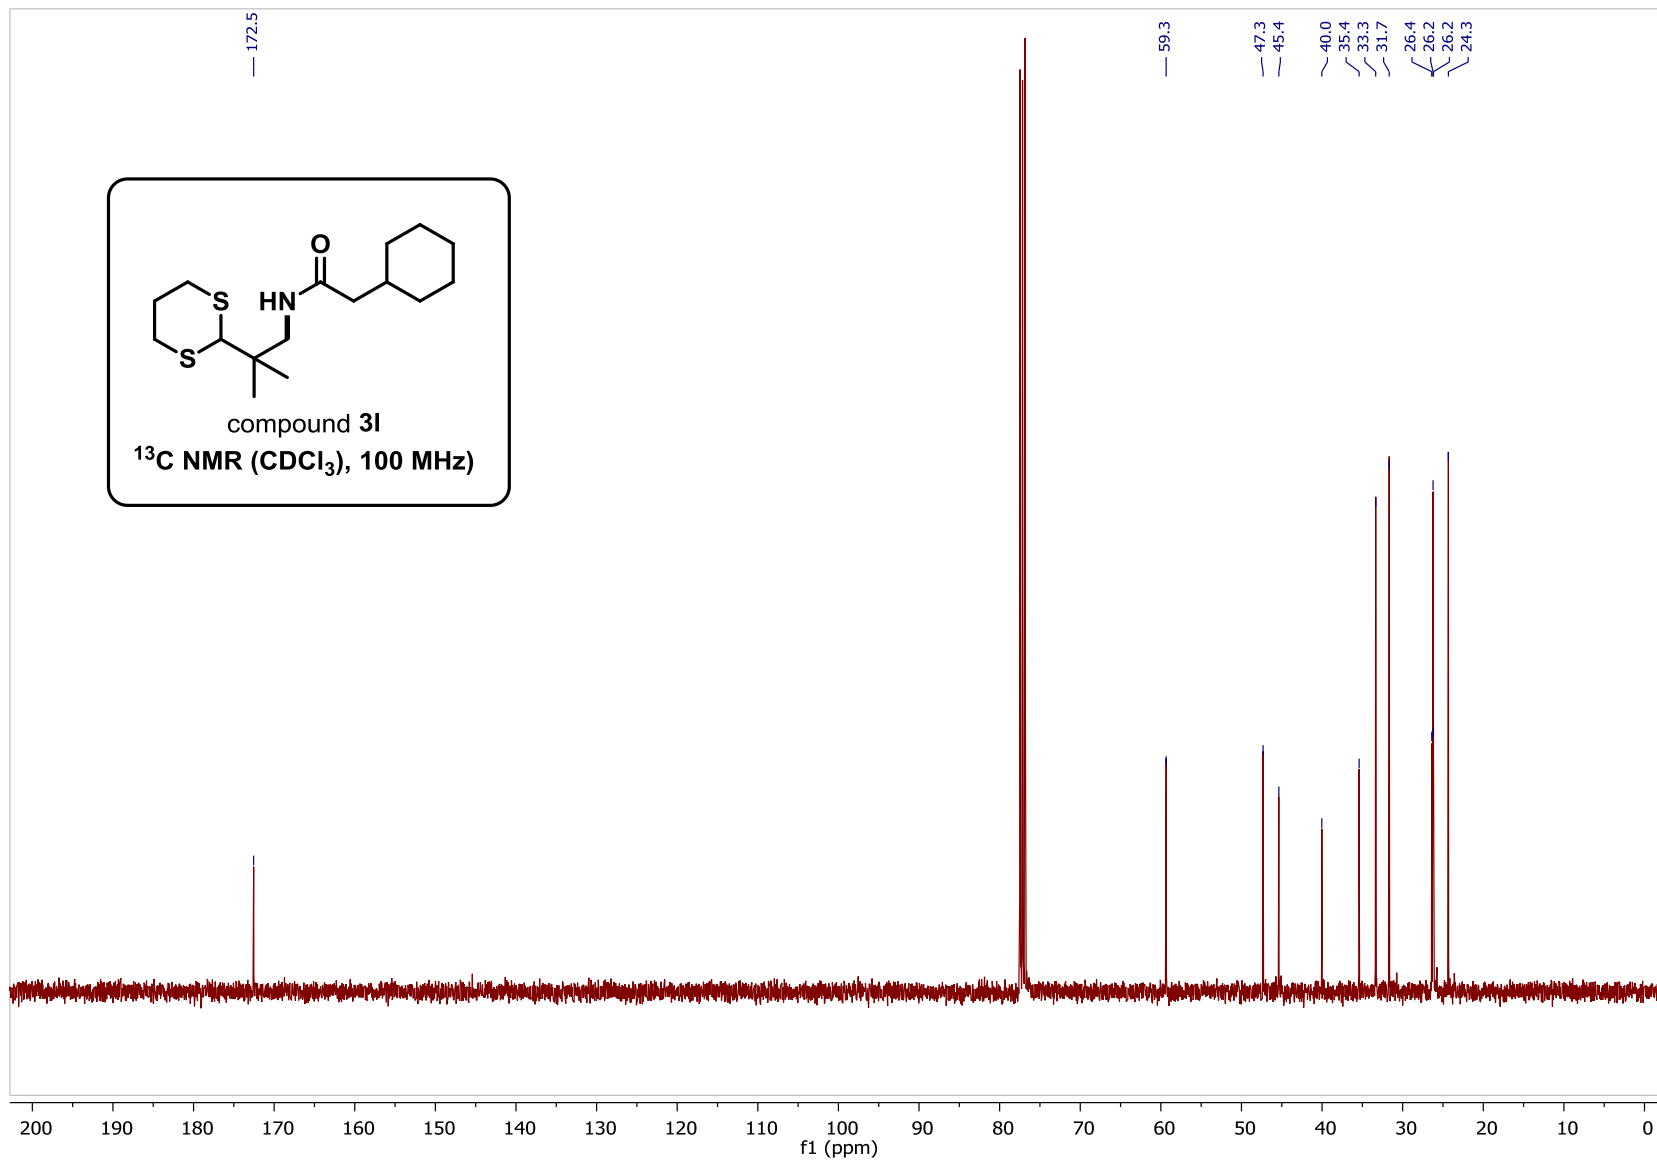

3.33. Compound 3m

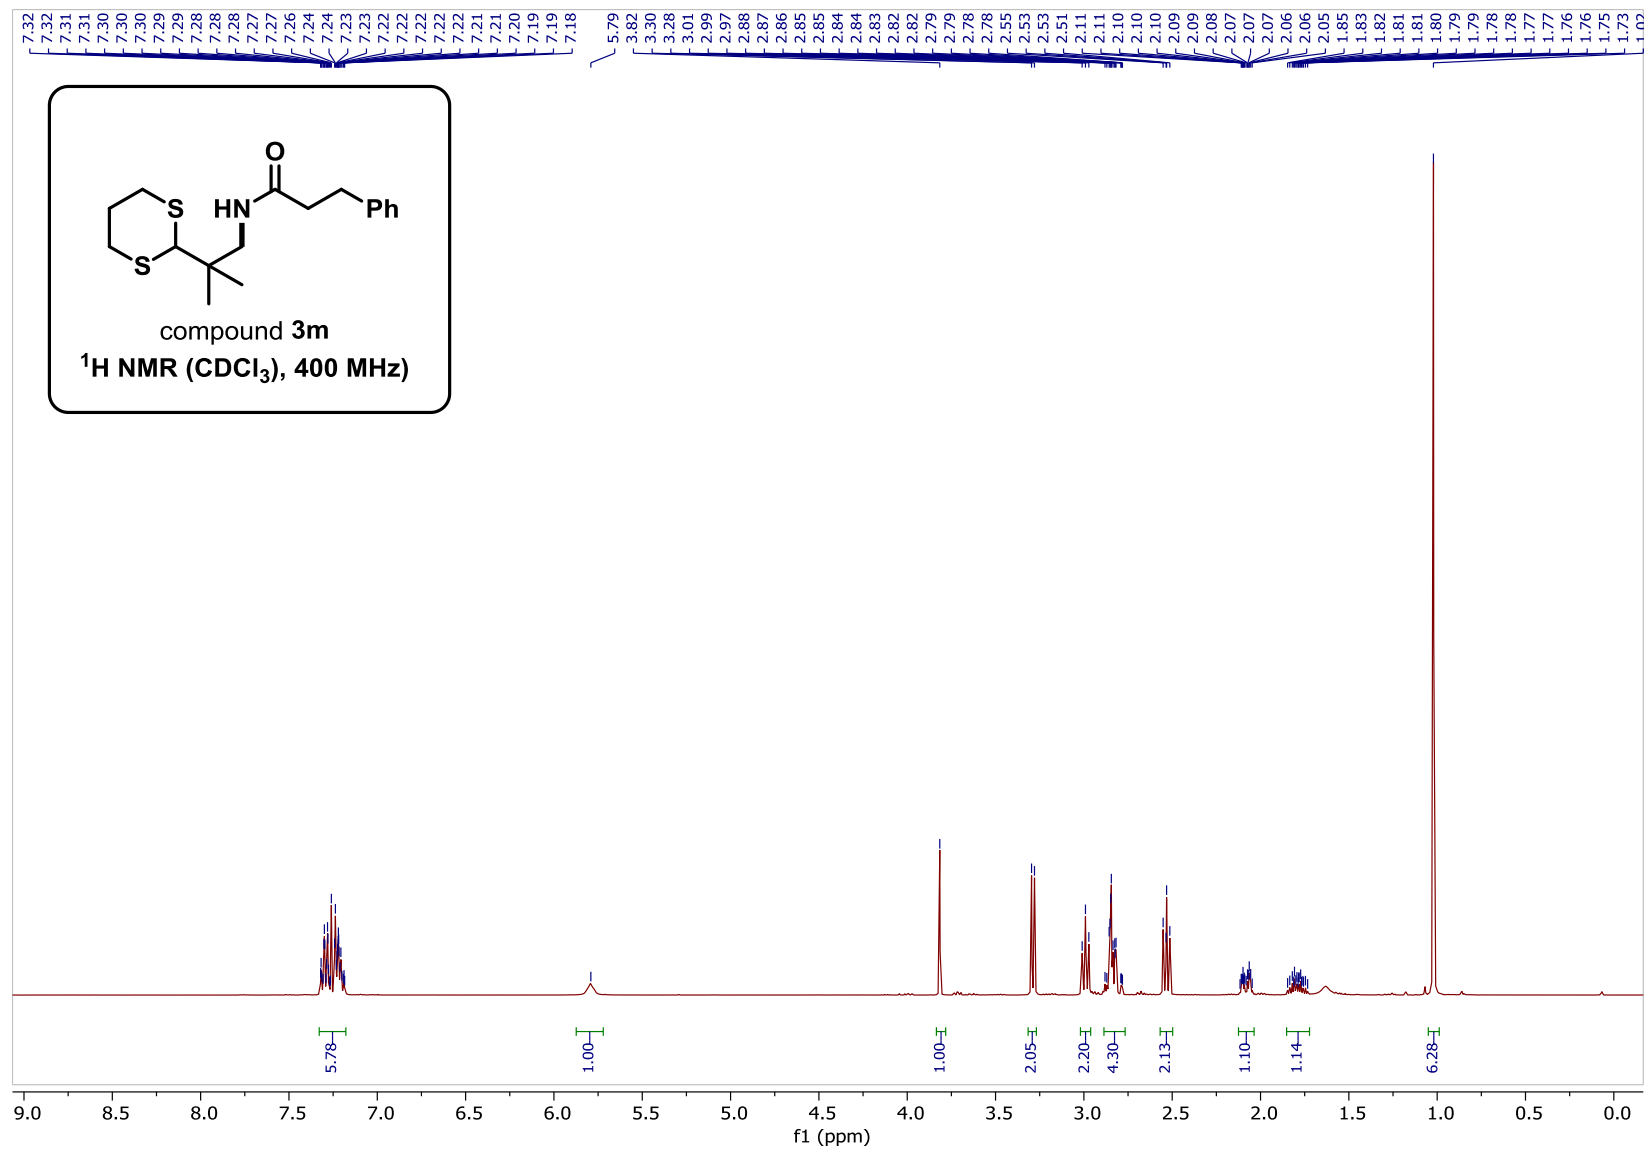

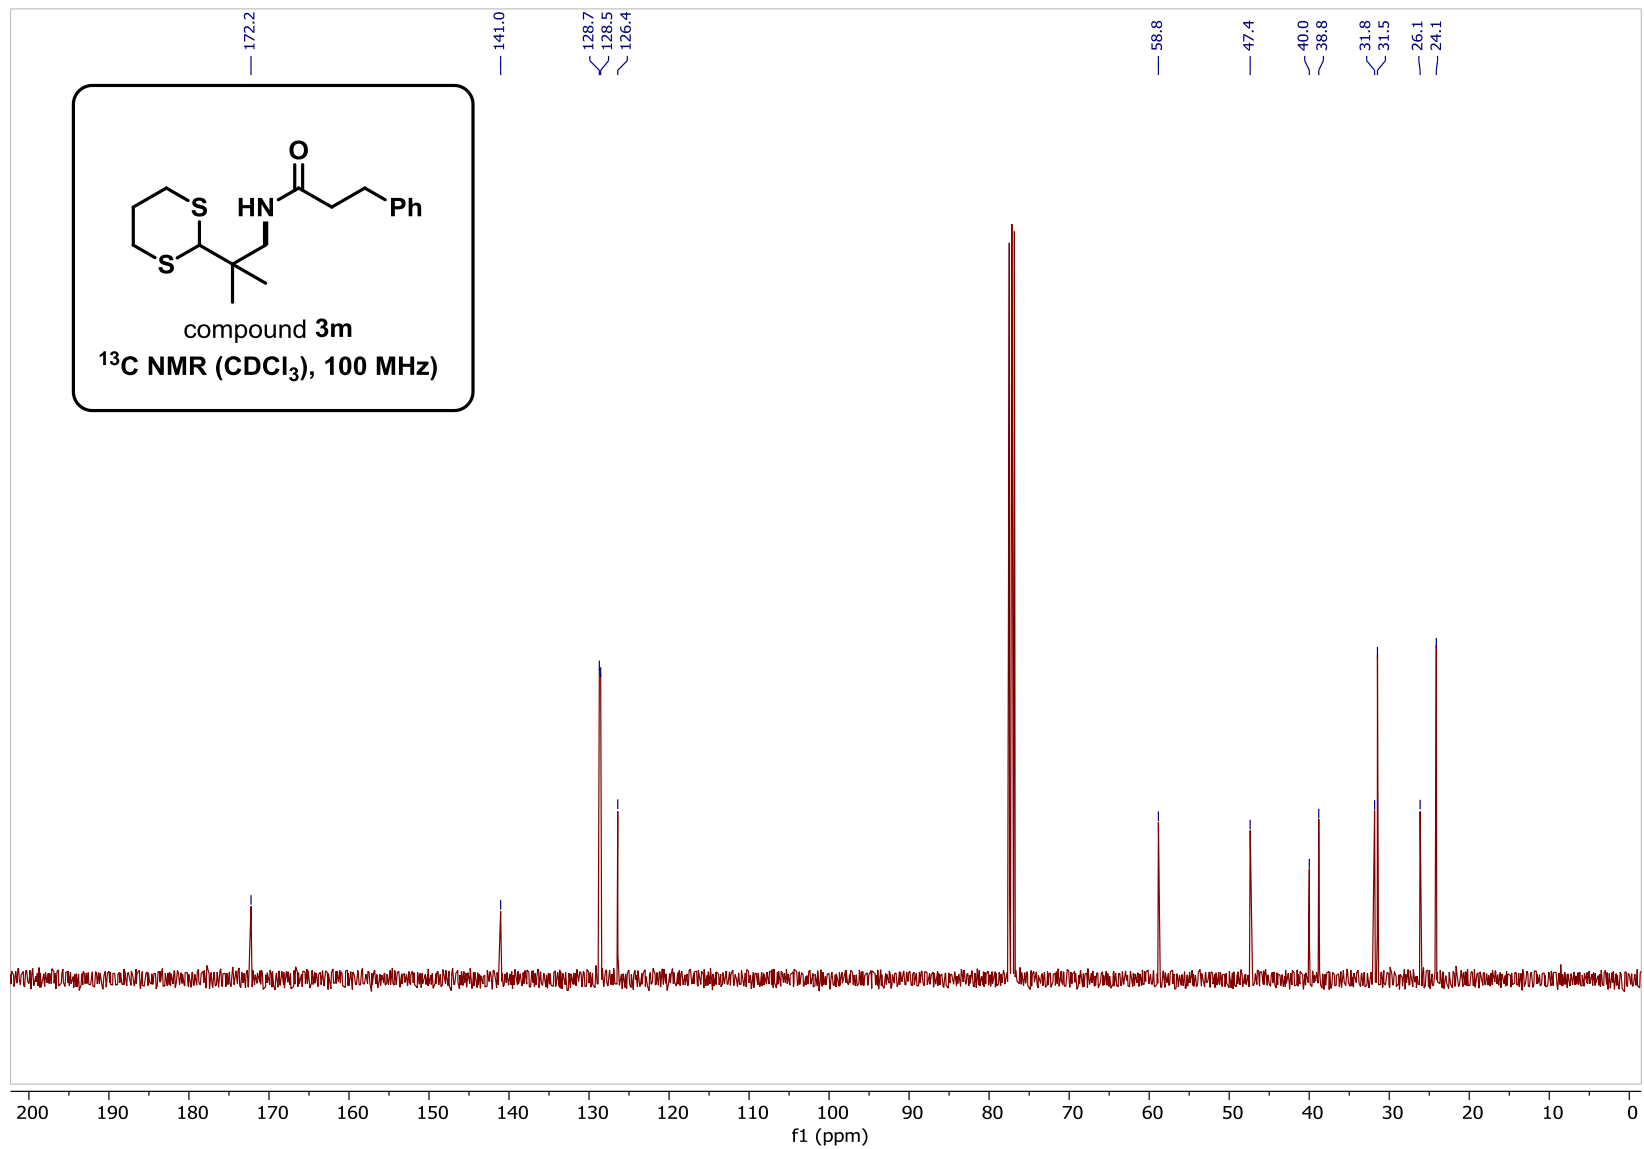

3.34. Compound 3n

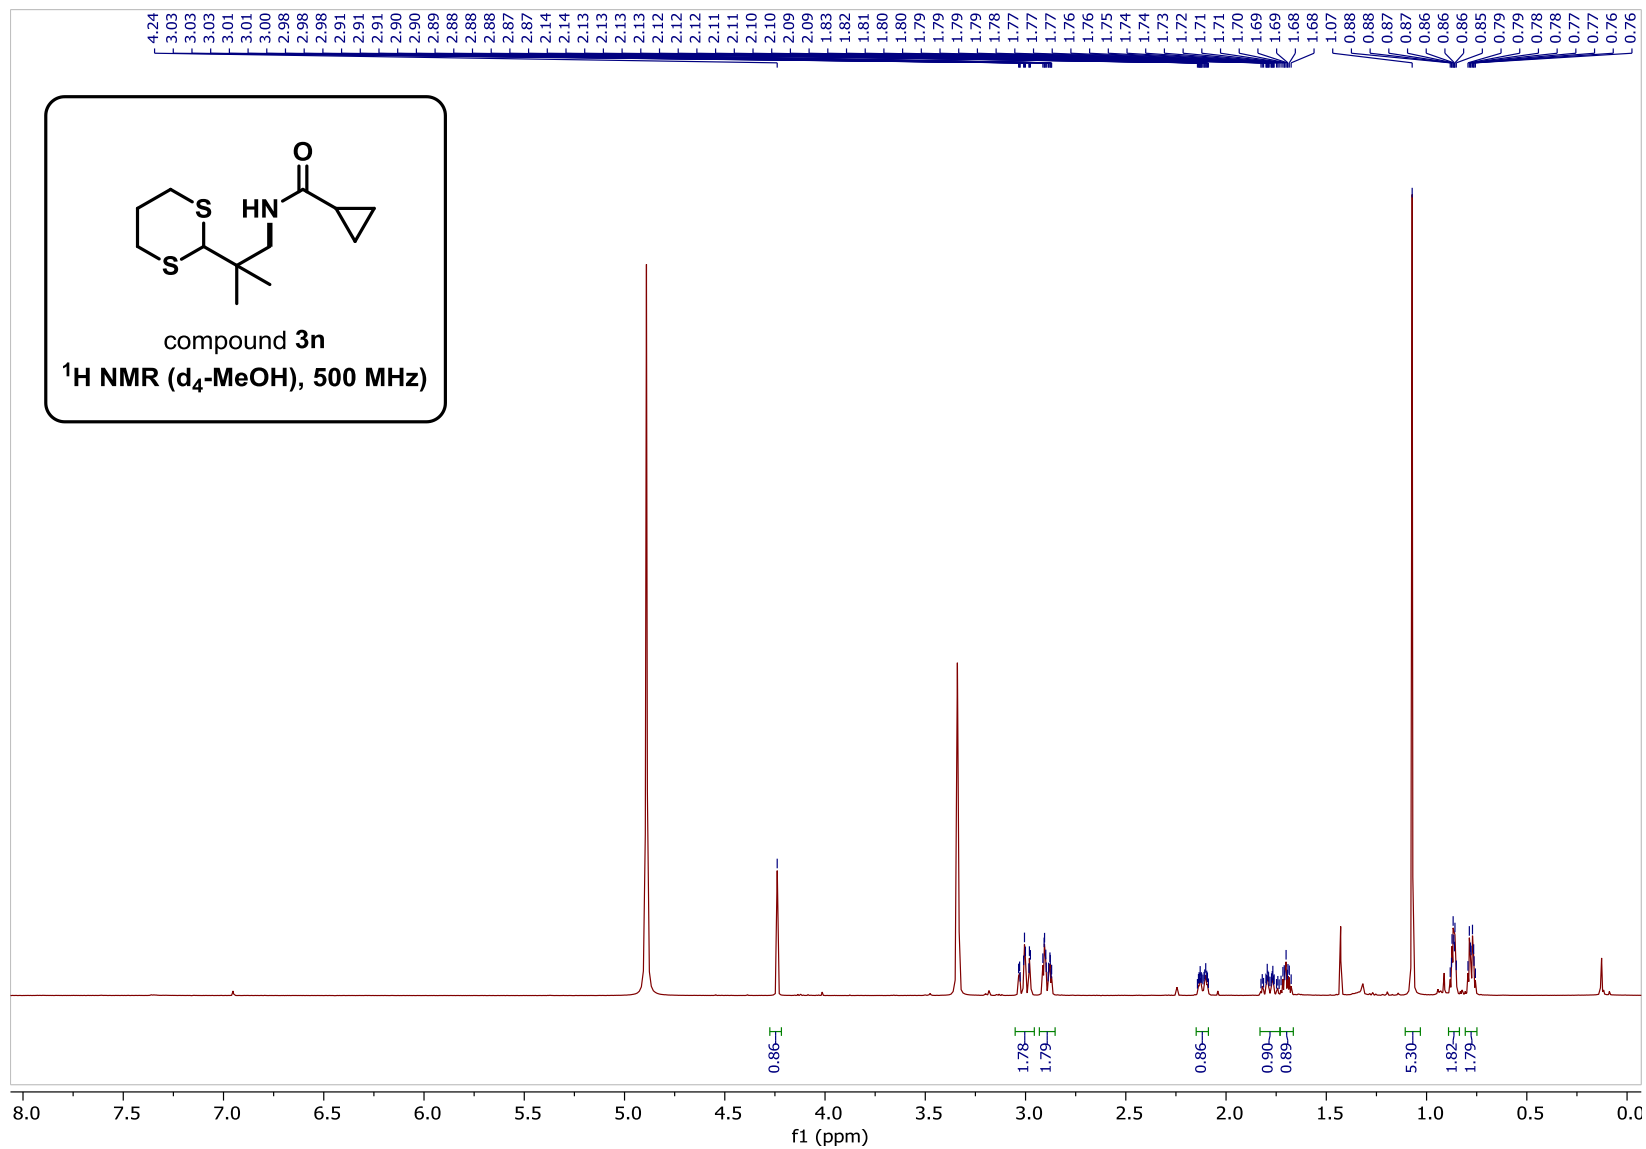

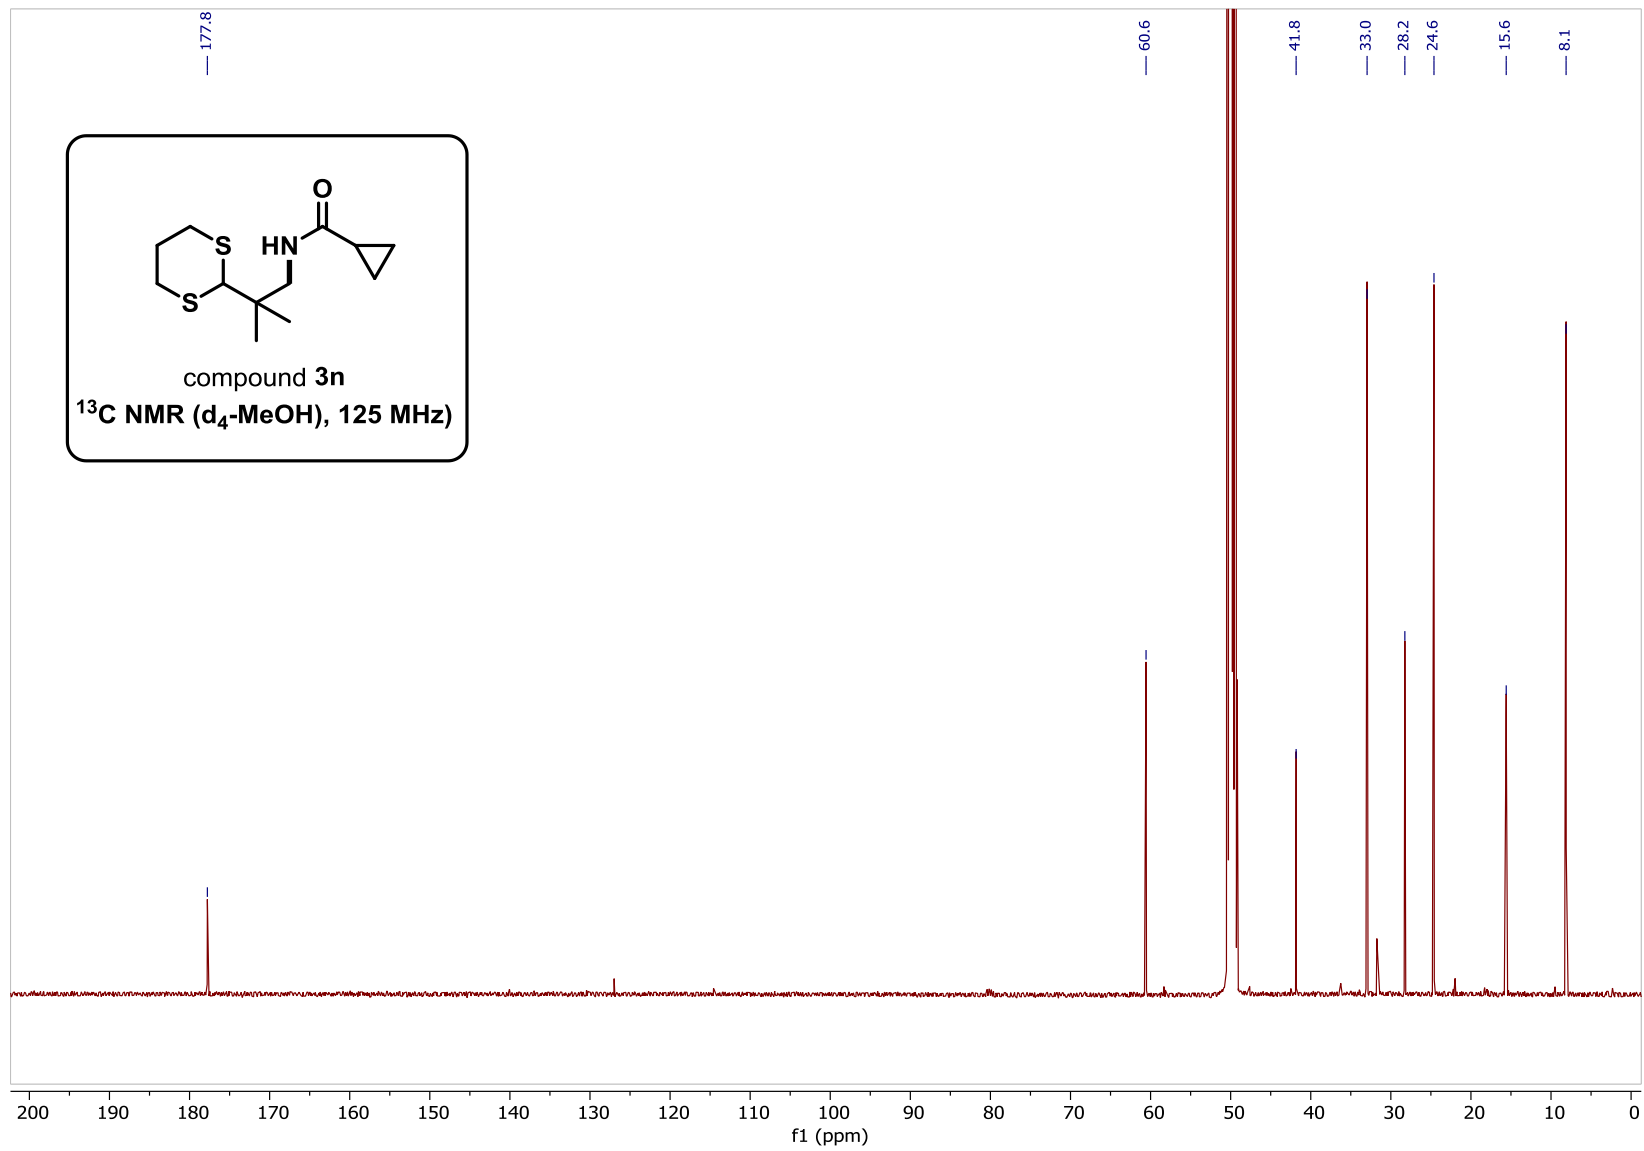



3.35. Compound 3o

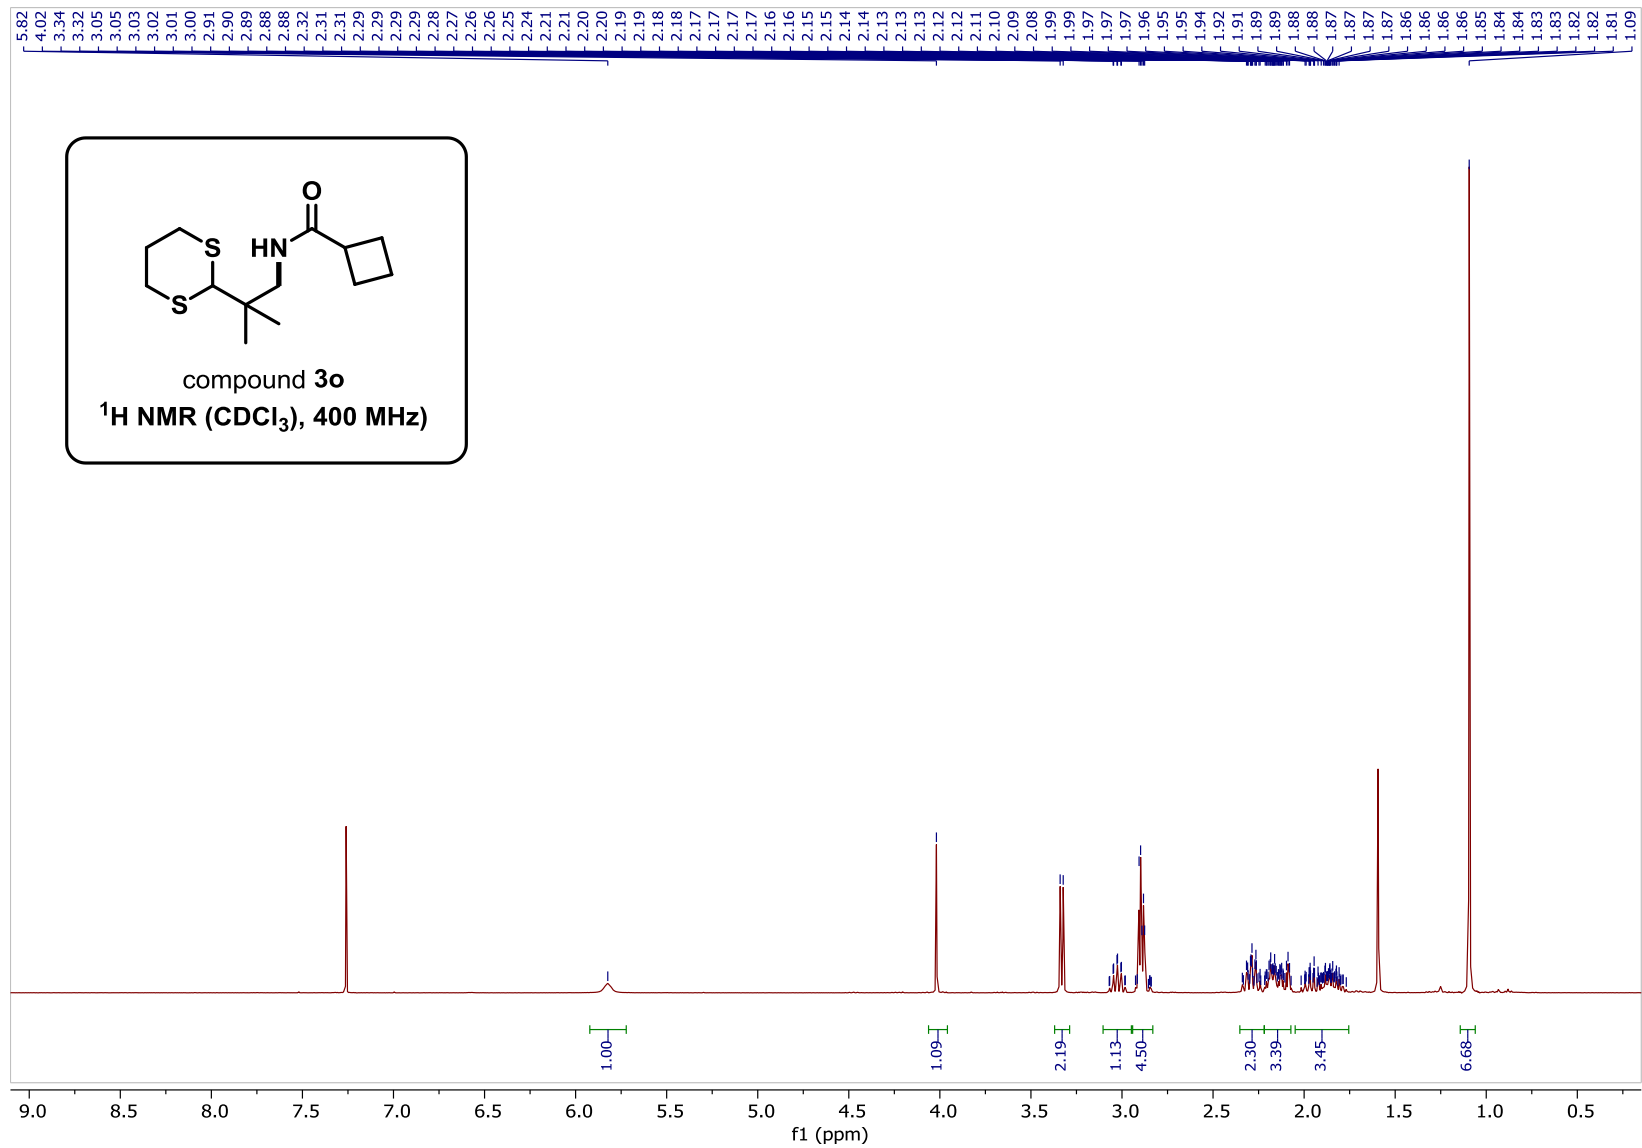

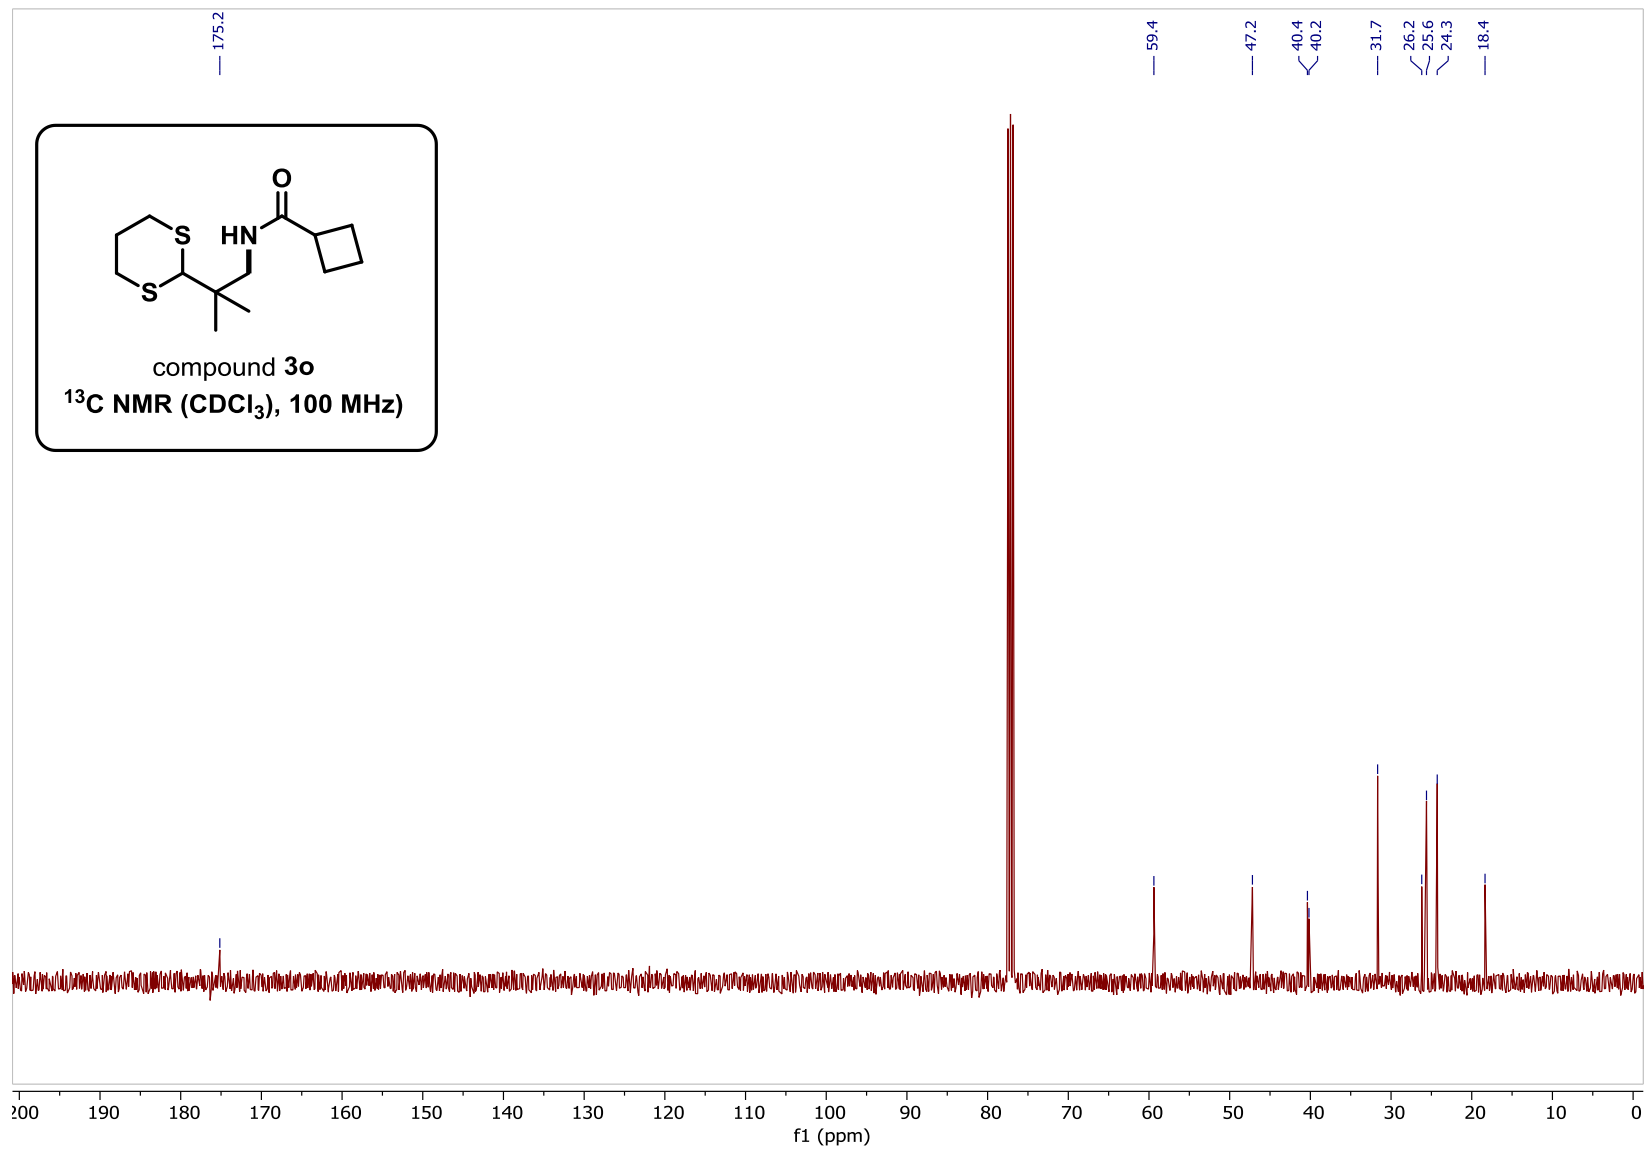

3.36. Compound 3p

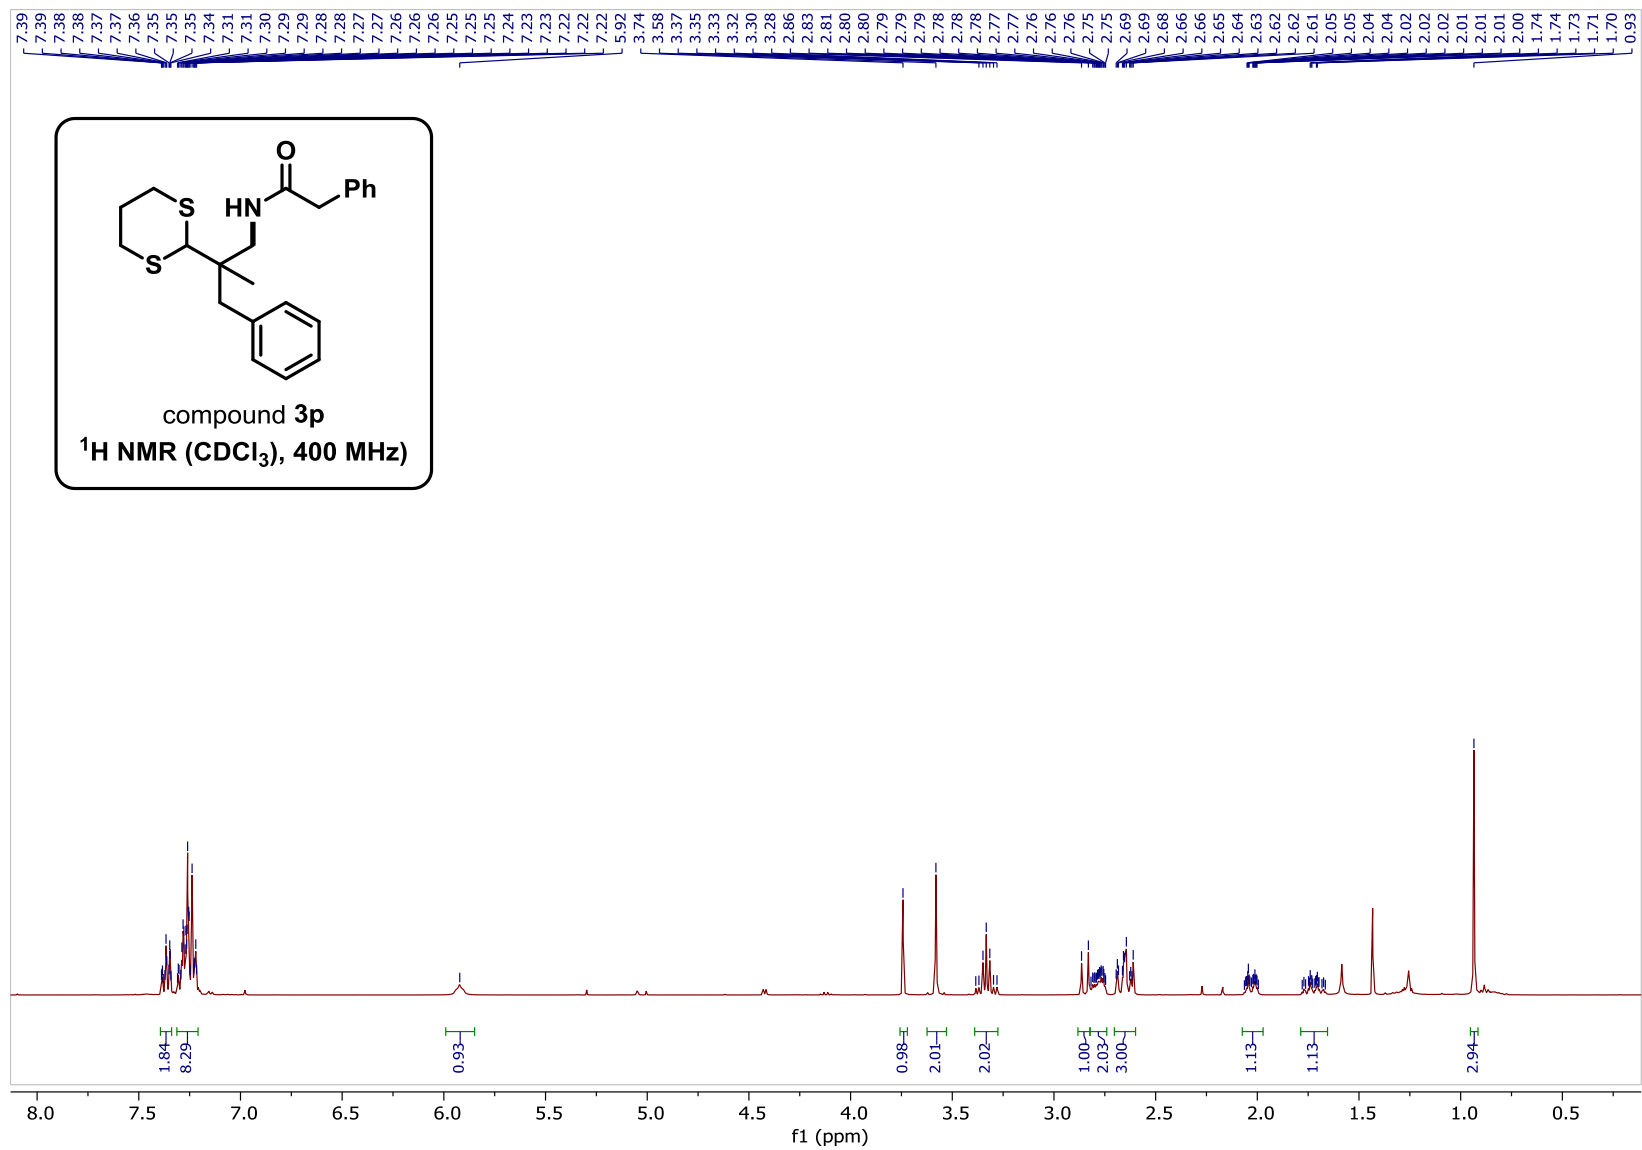

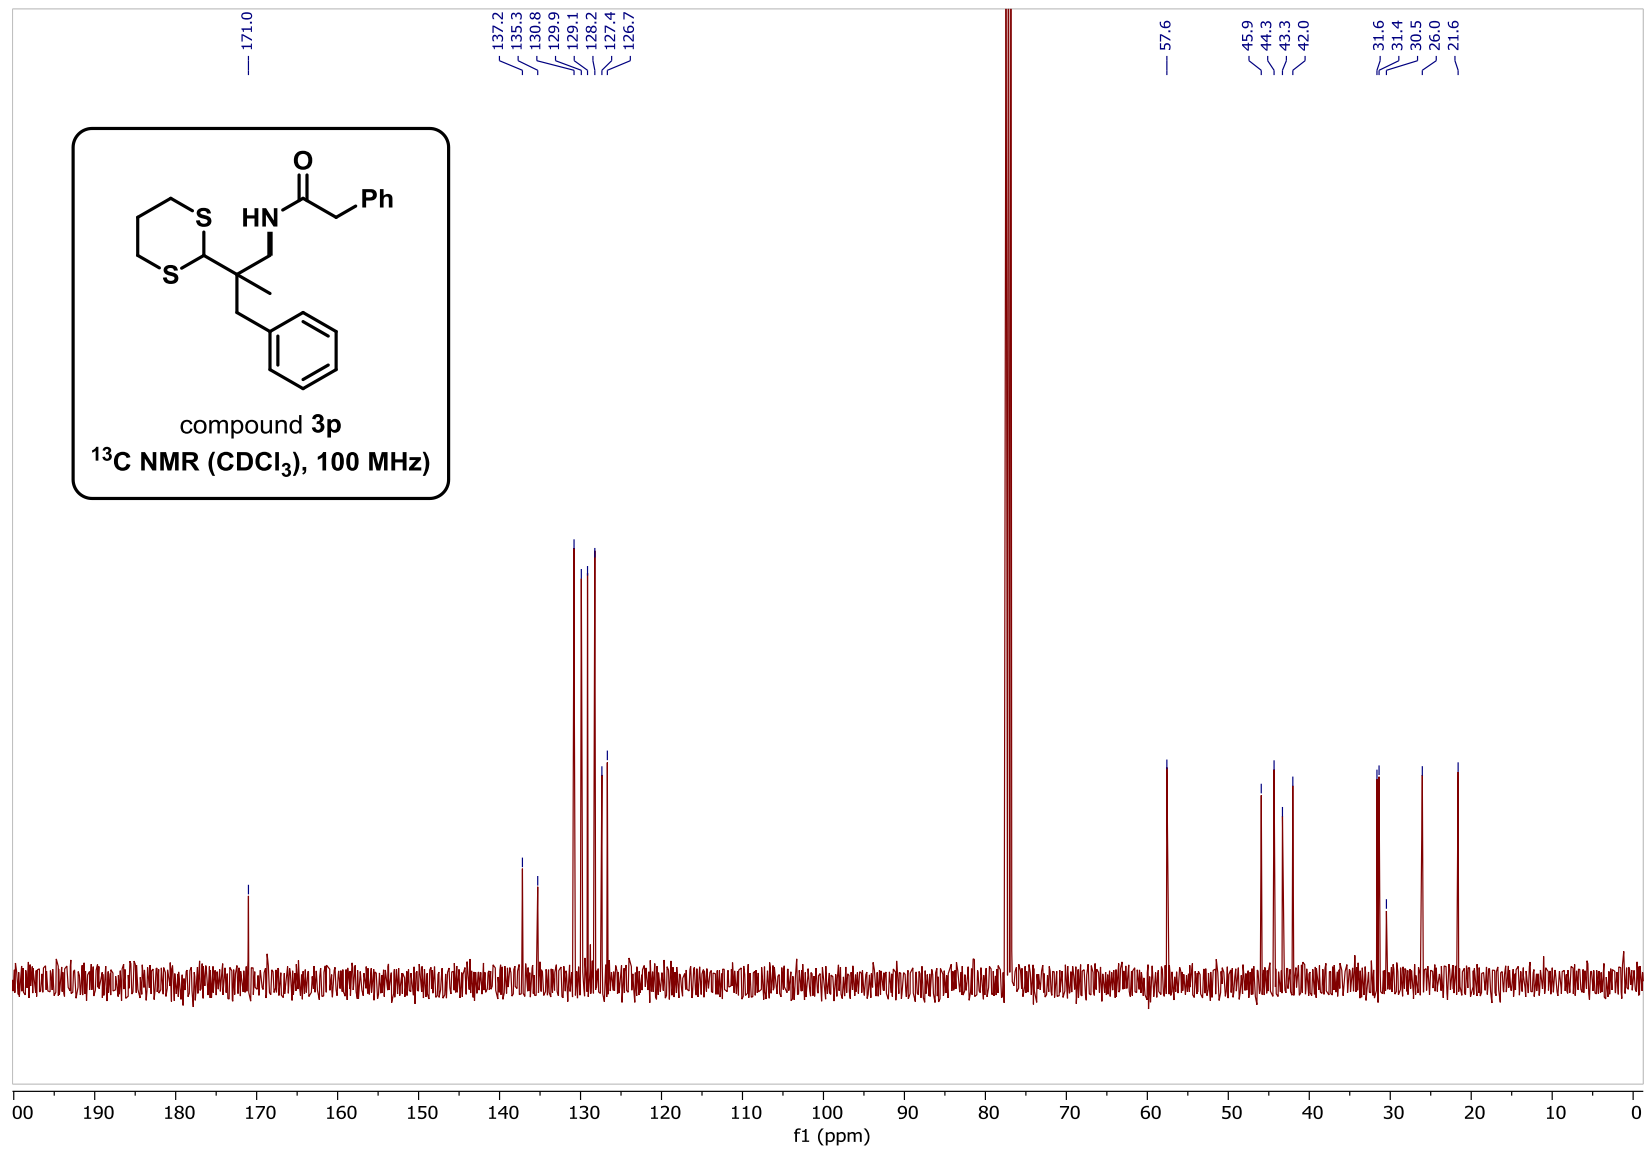

3.37. Compound 3q

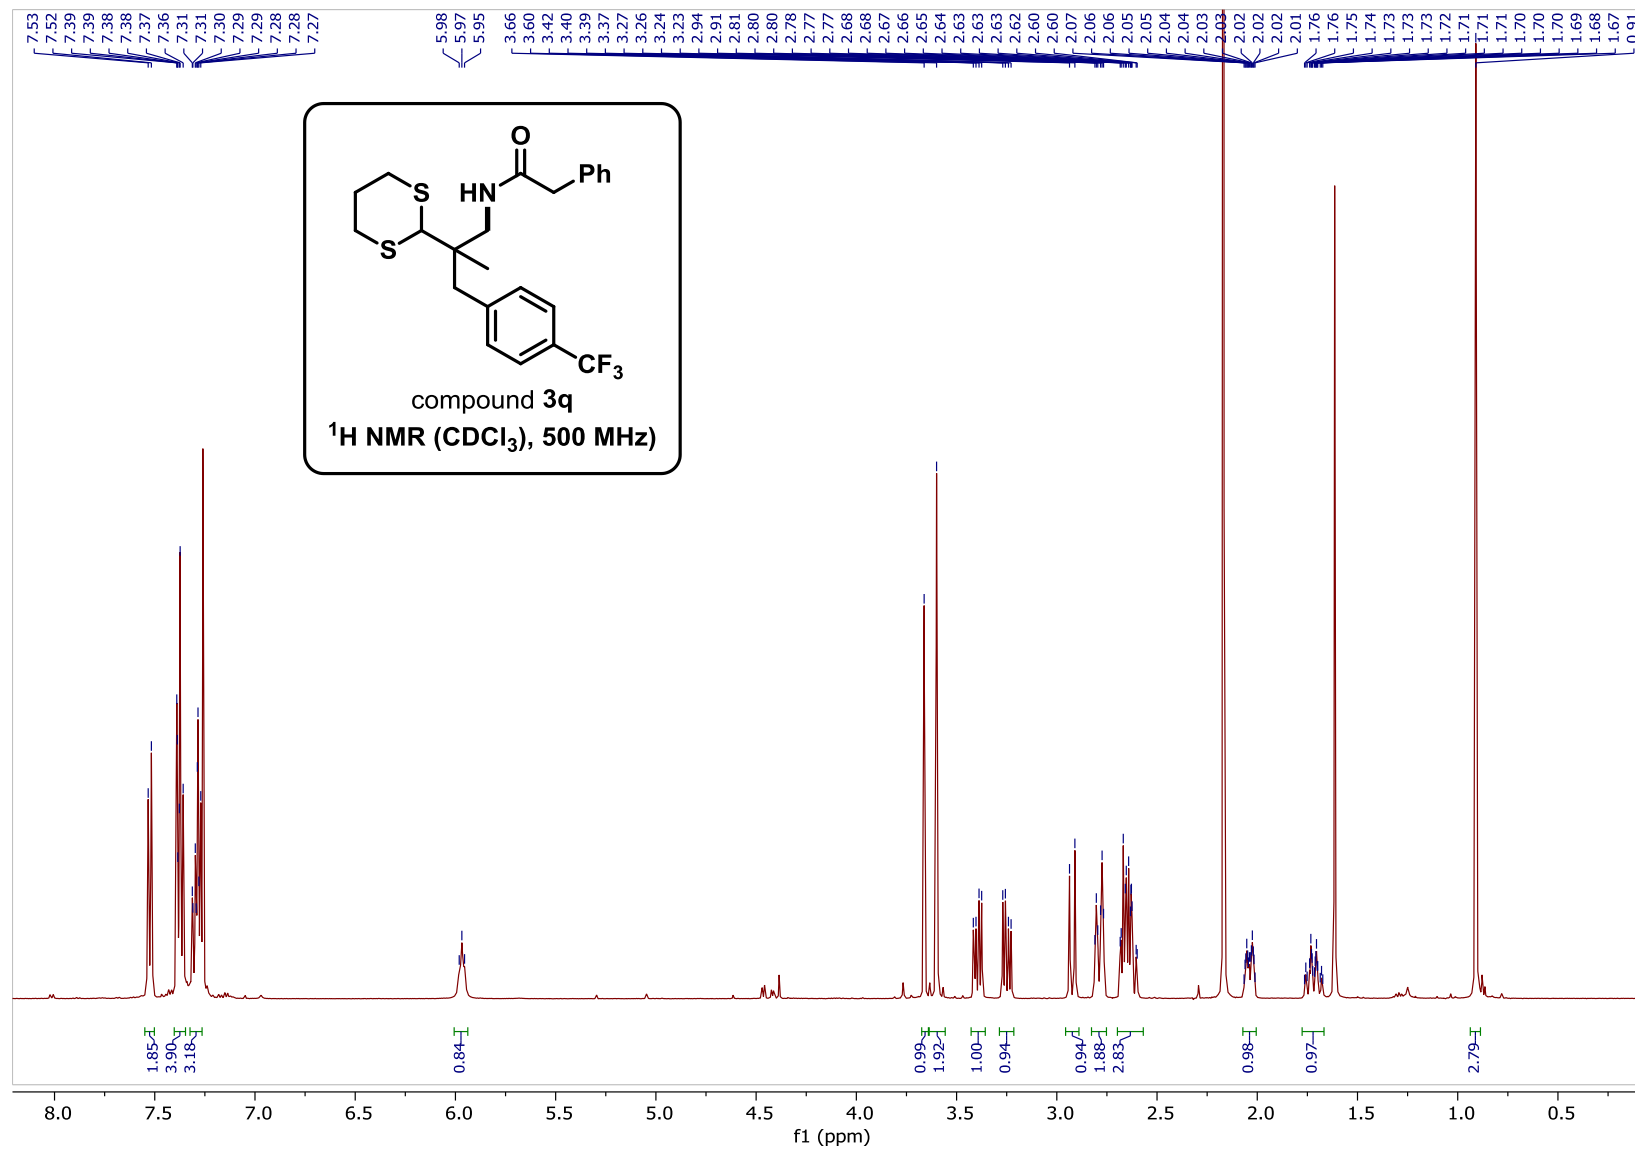

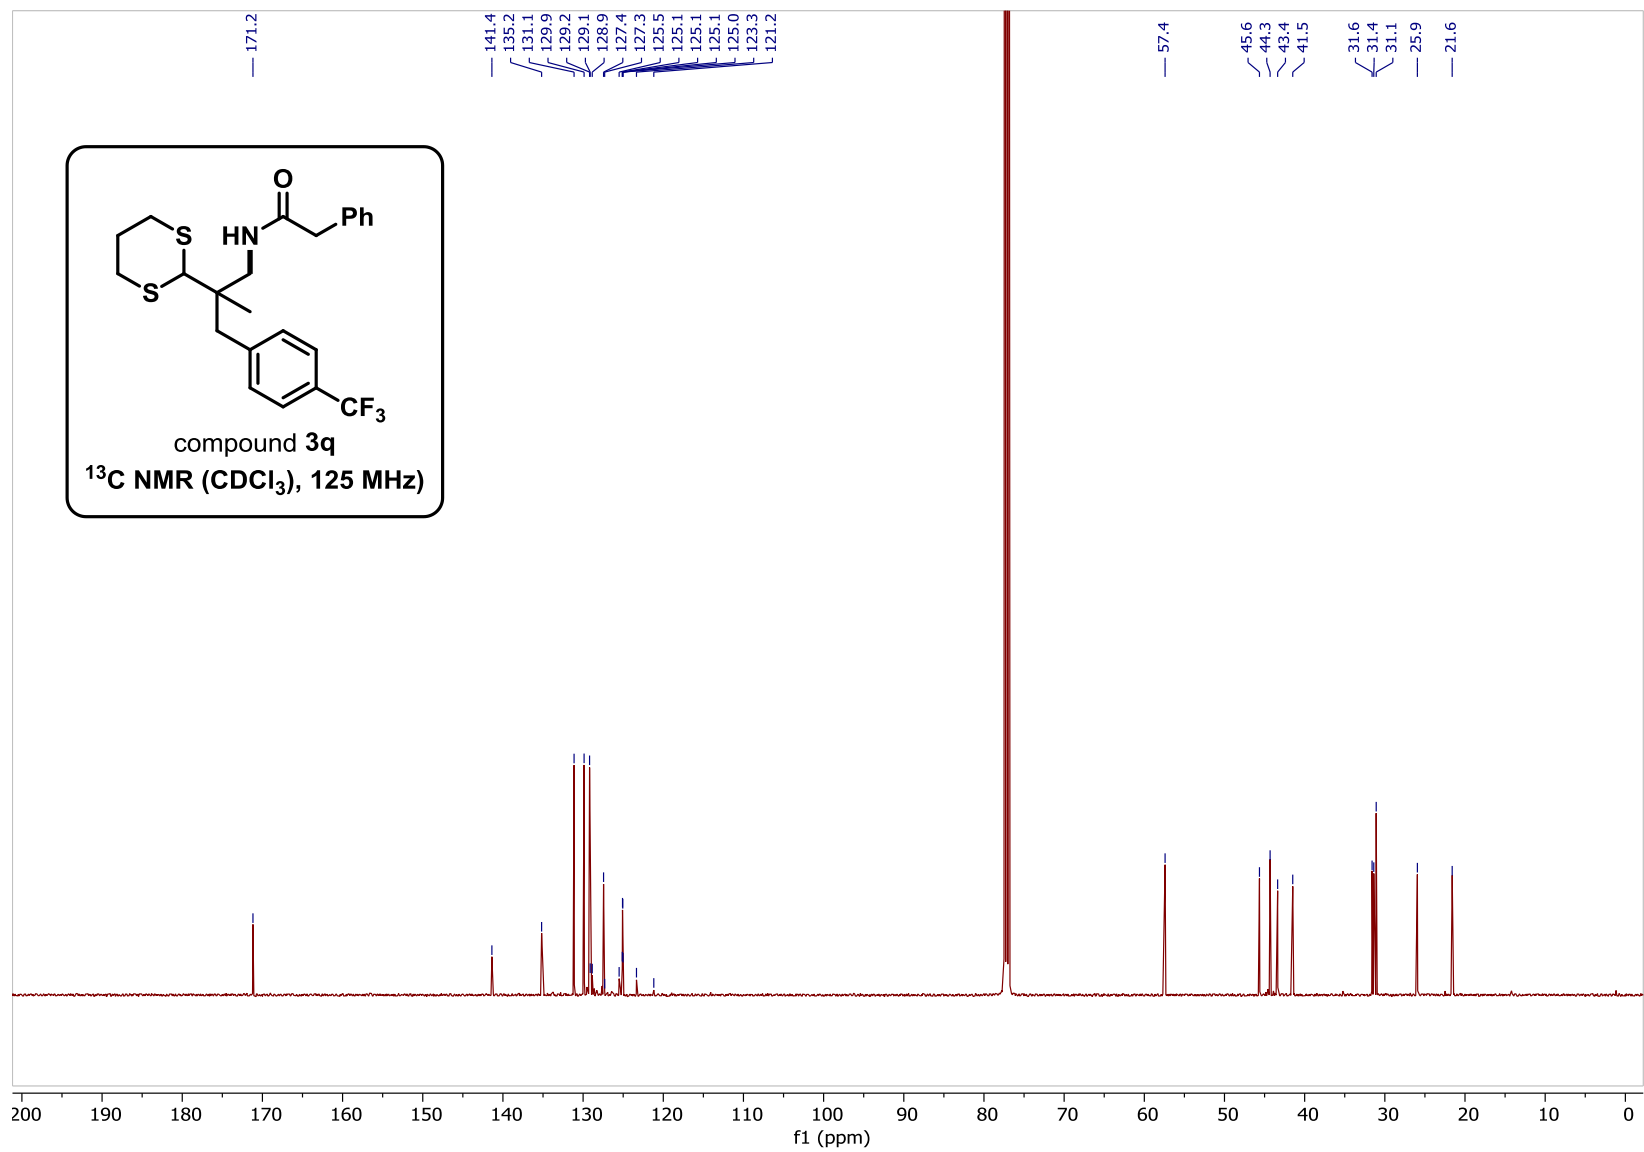

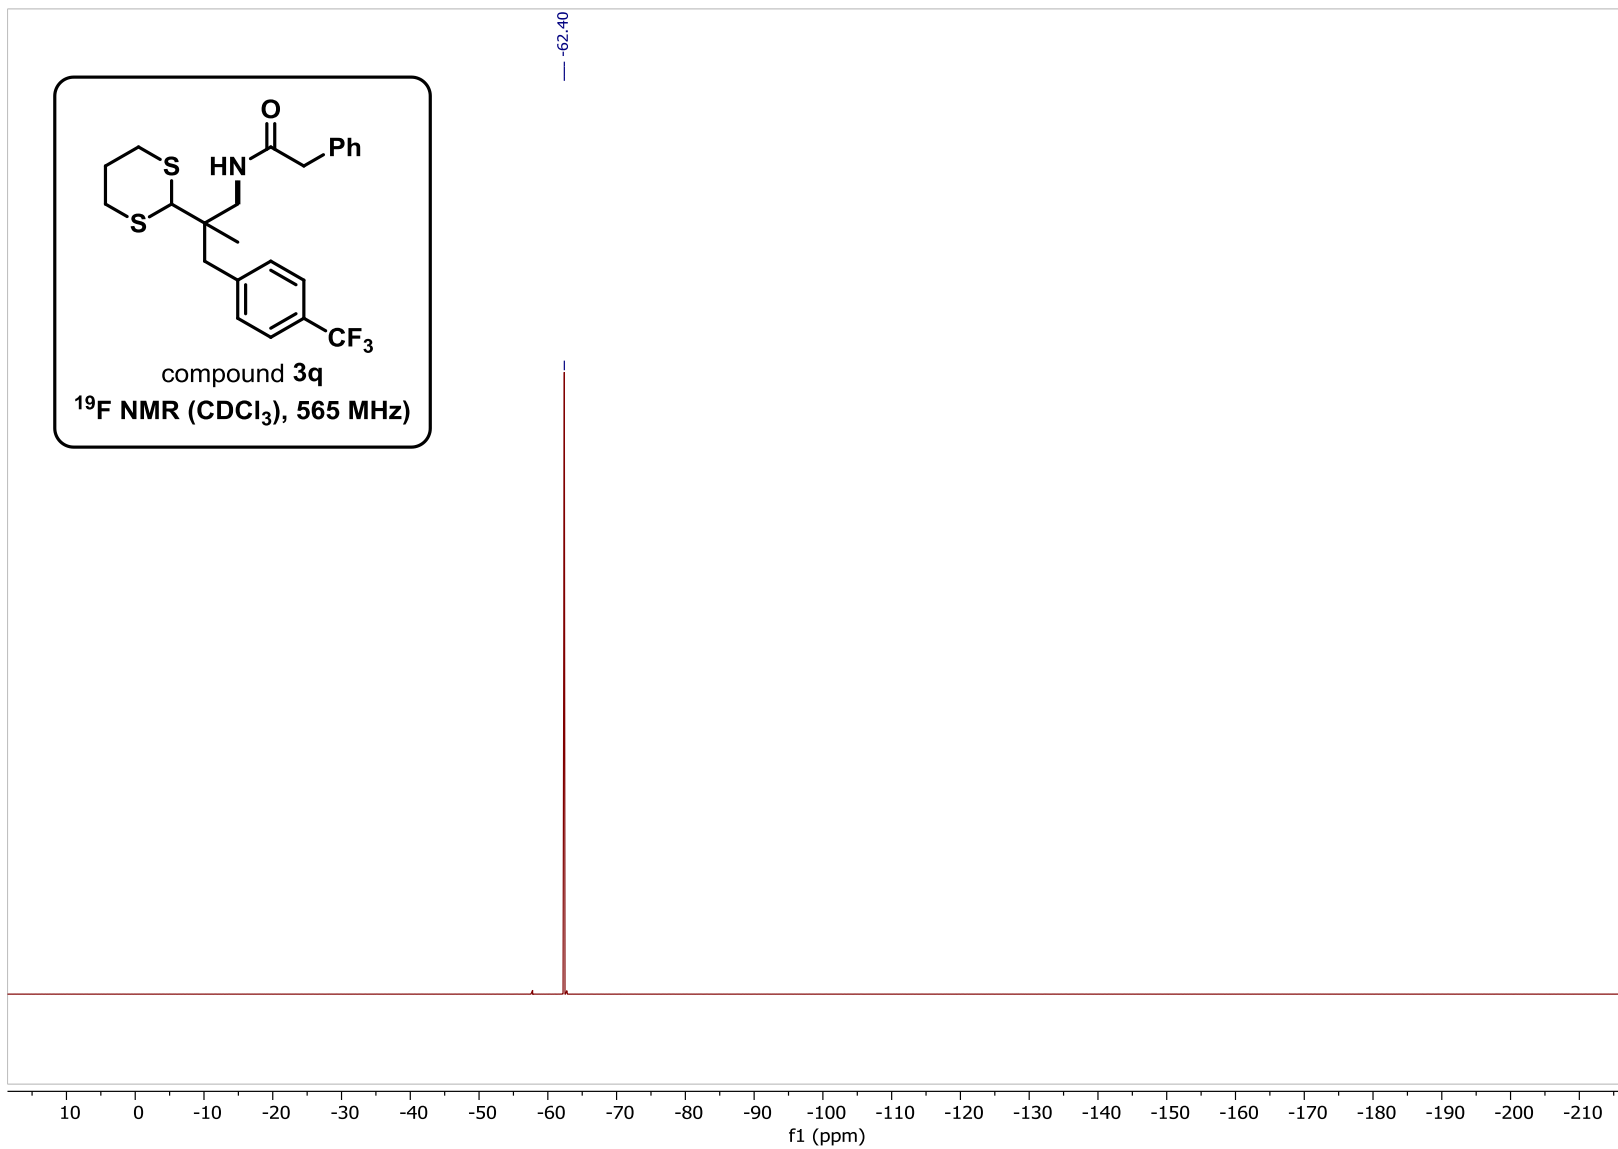

3.38. Compound 3r

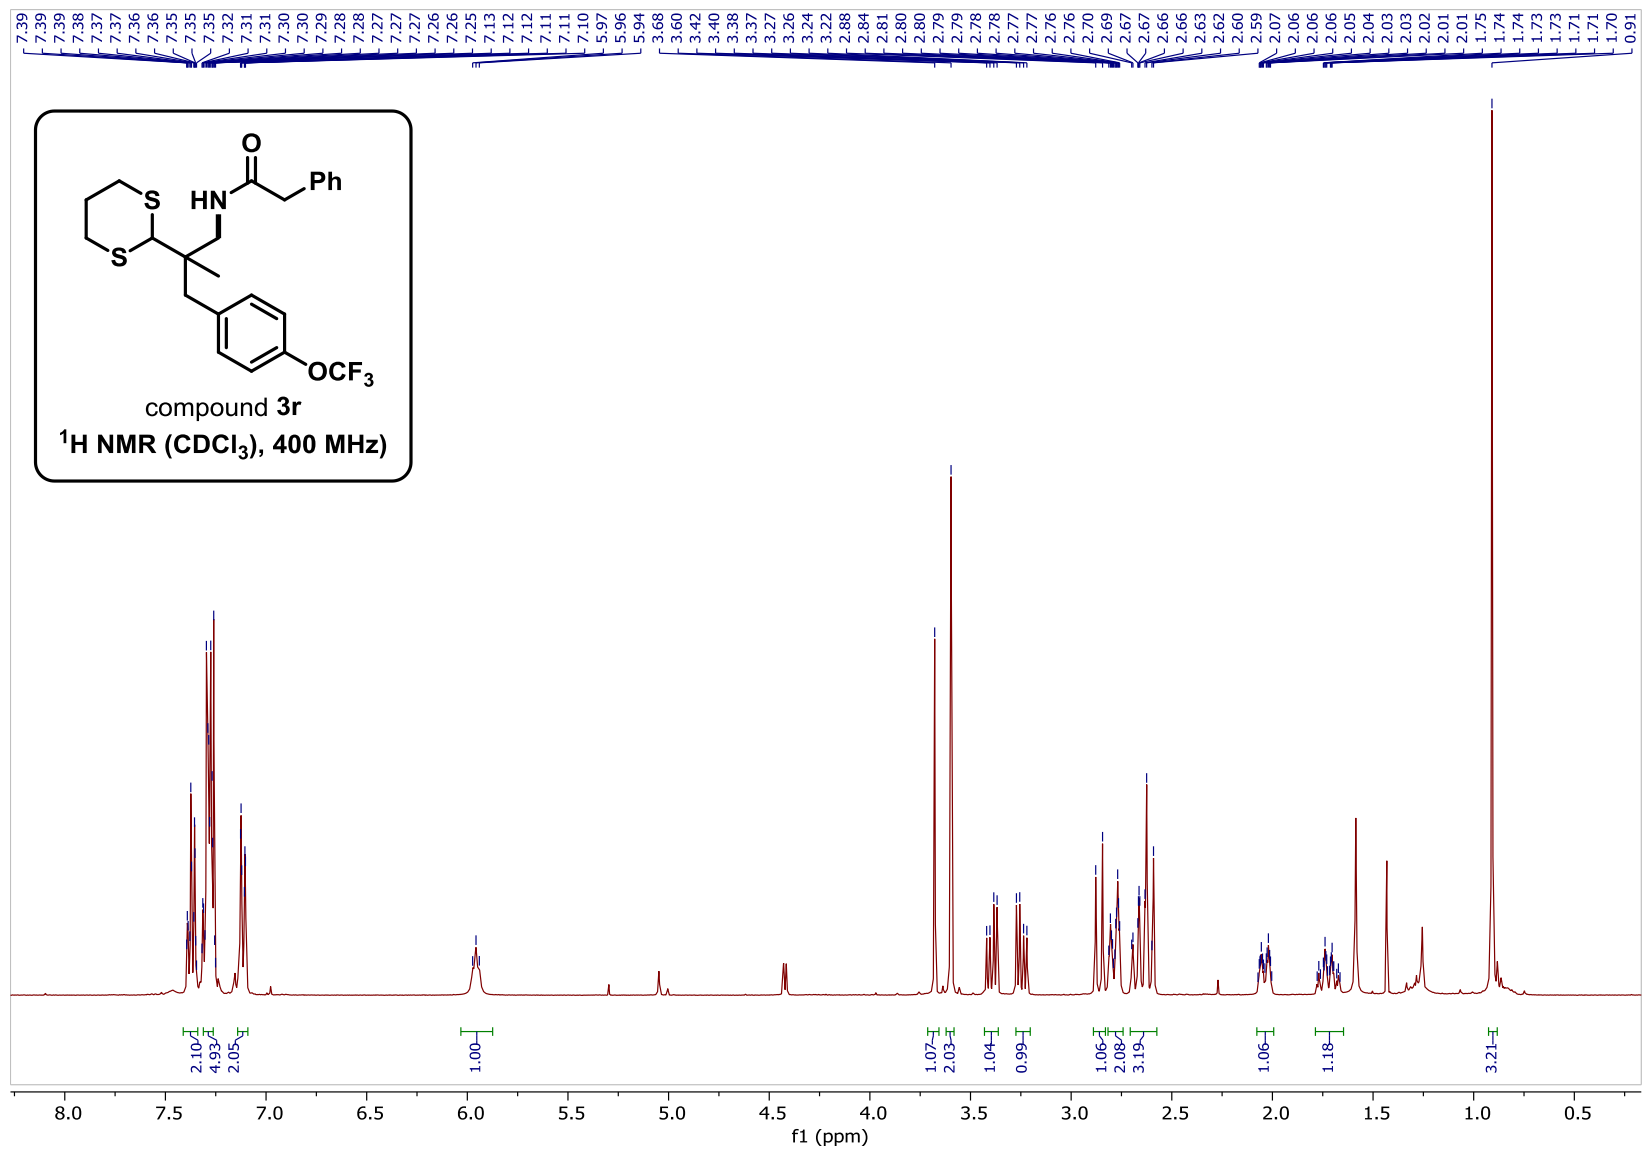



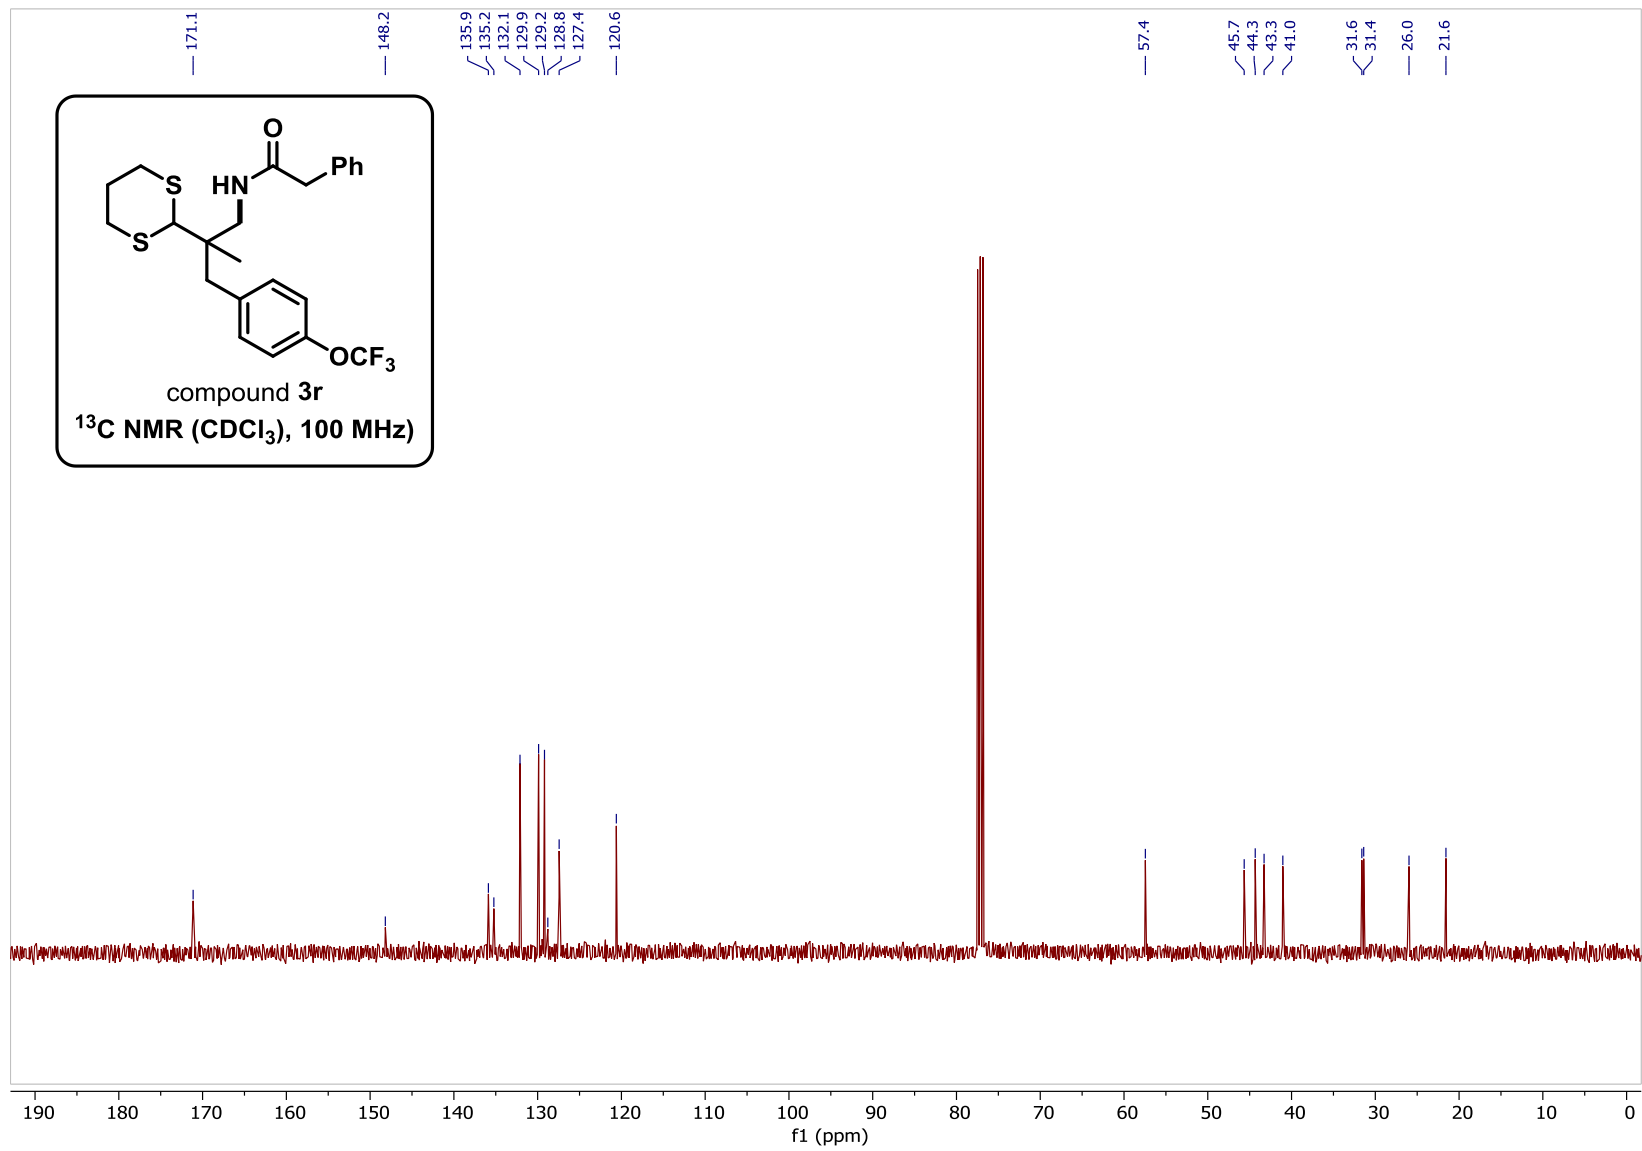

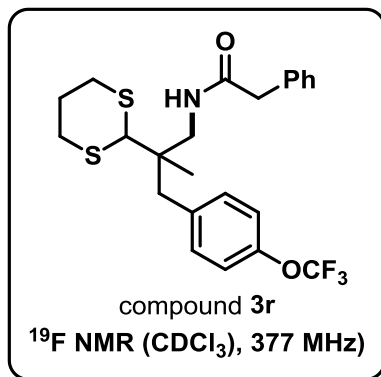

— -57.79

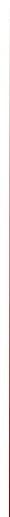

90 80 70 60 50 40 30 20 10 0 -10 -20 -30 -40 -50 -60 -70 -80 -90 -100 -110 -120 -130 -140 -150 -160 -170 -180 -190 -200 -210 -220 -230 -240  
f1 (ppm)

3.39. Compound 3s

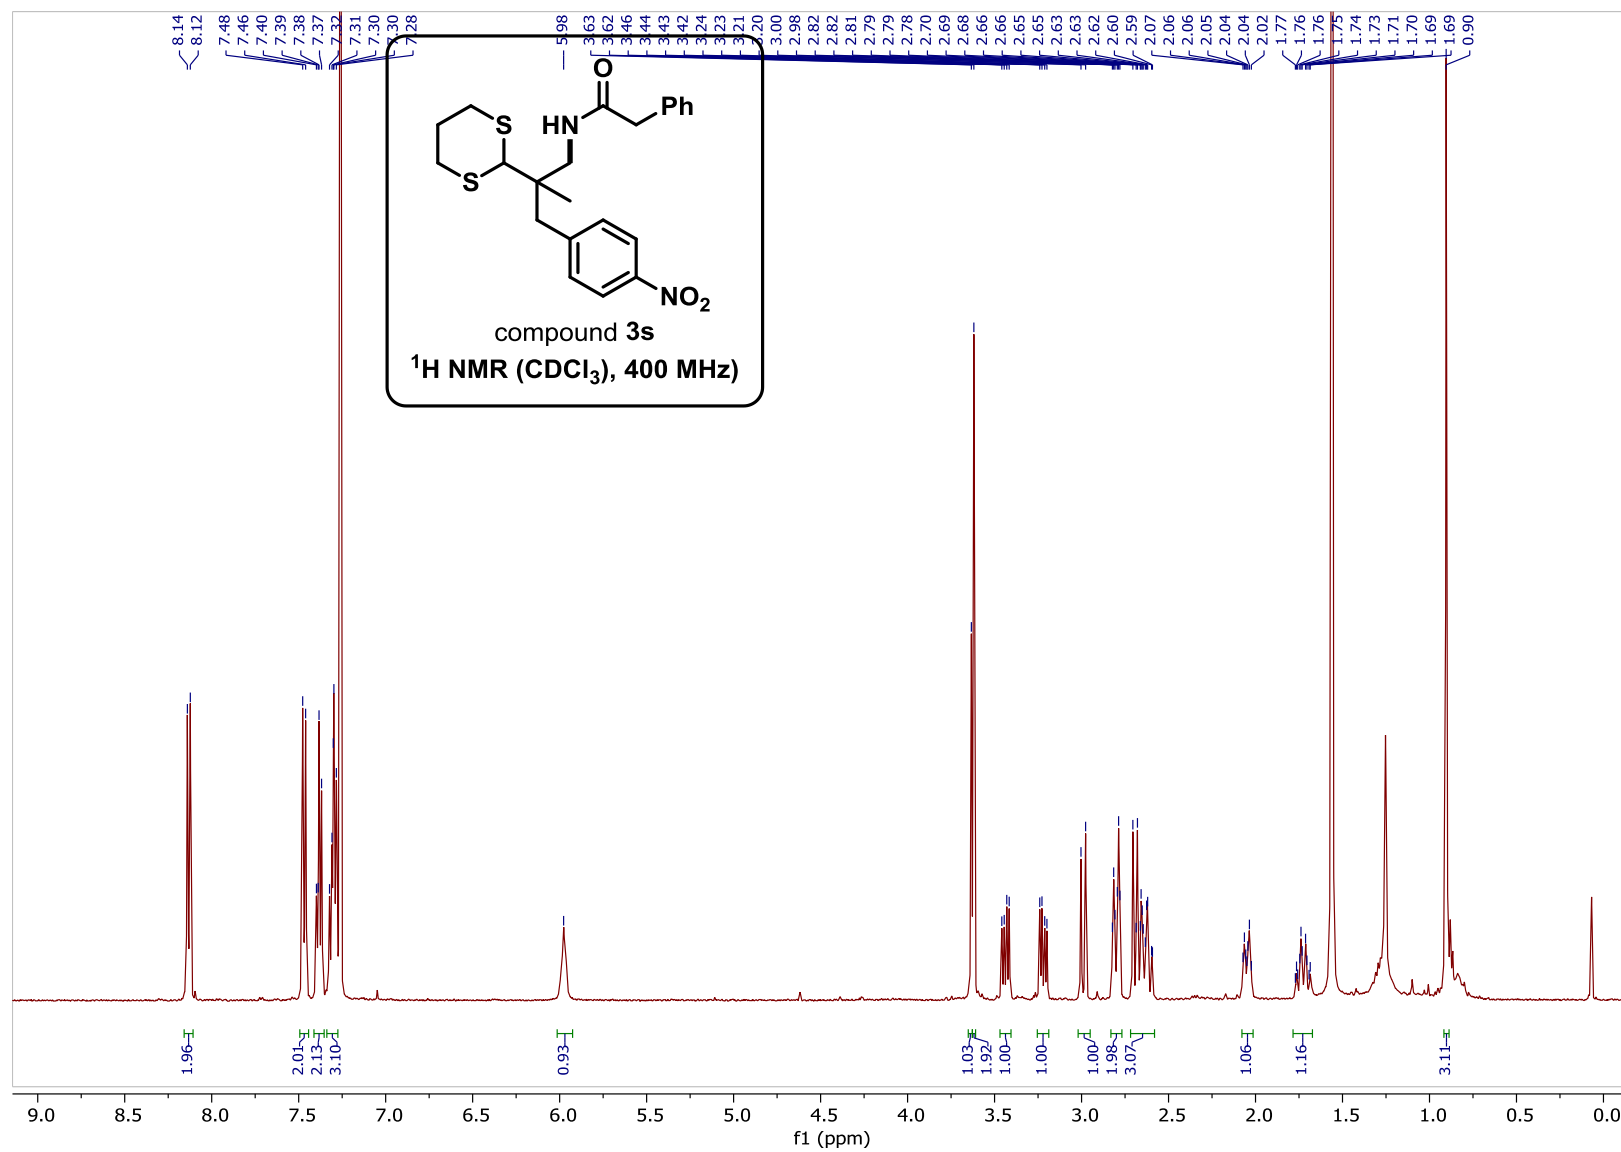

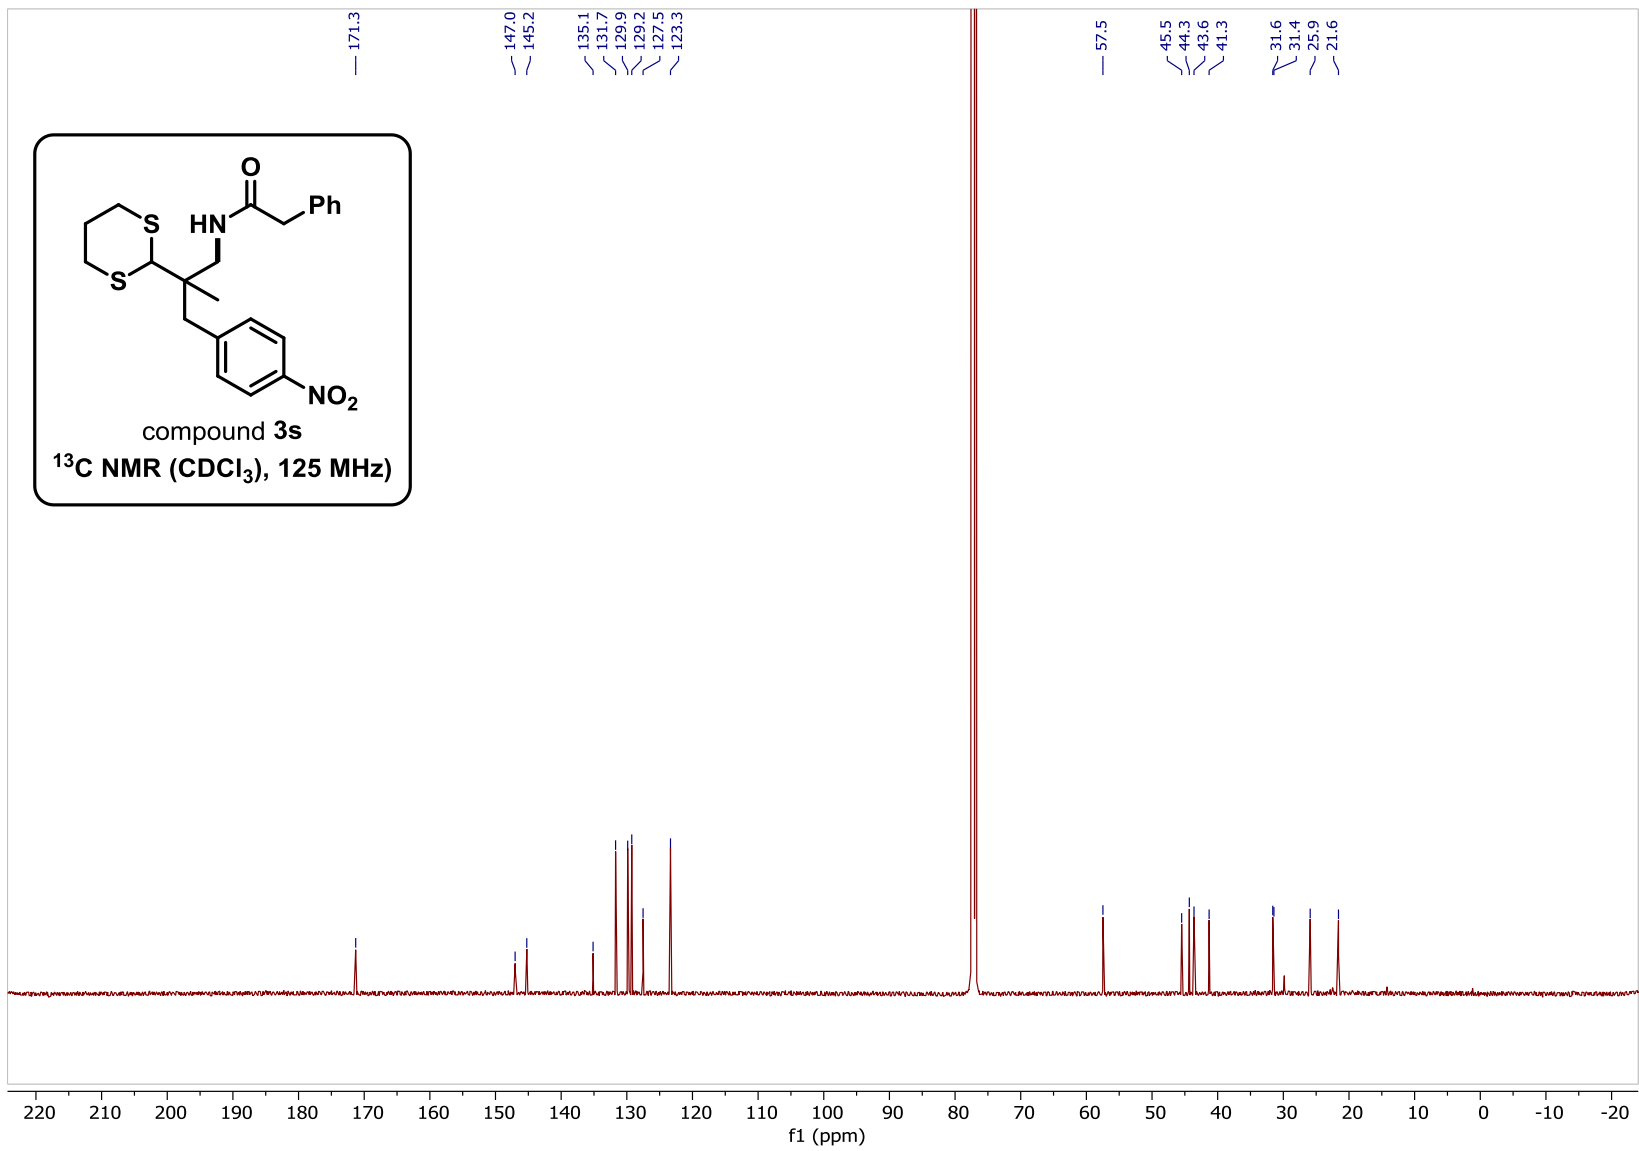

Compound 3t

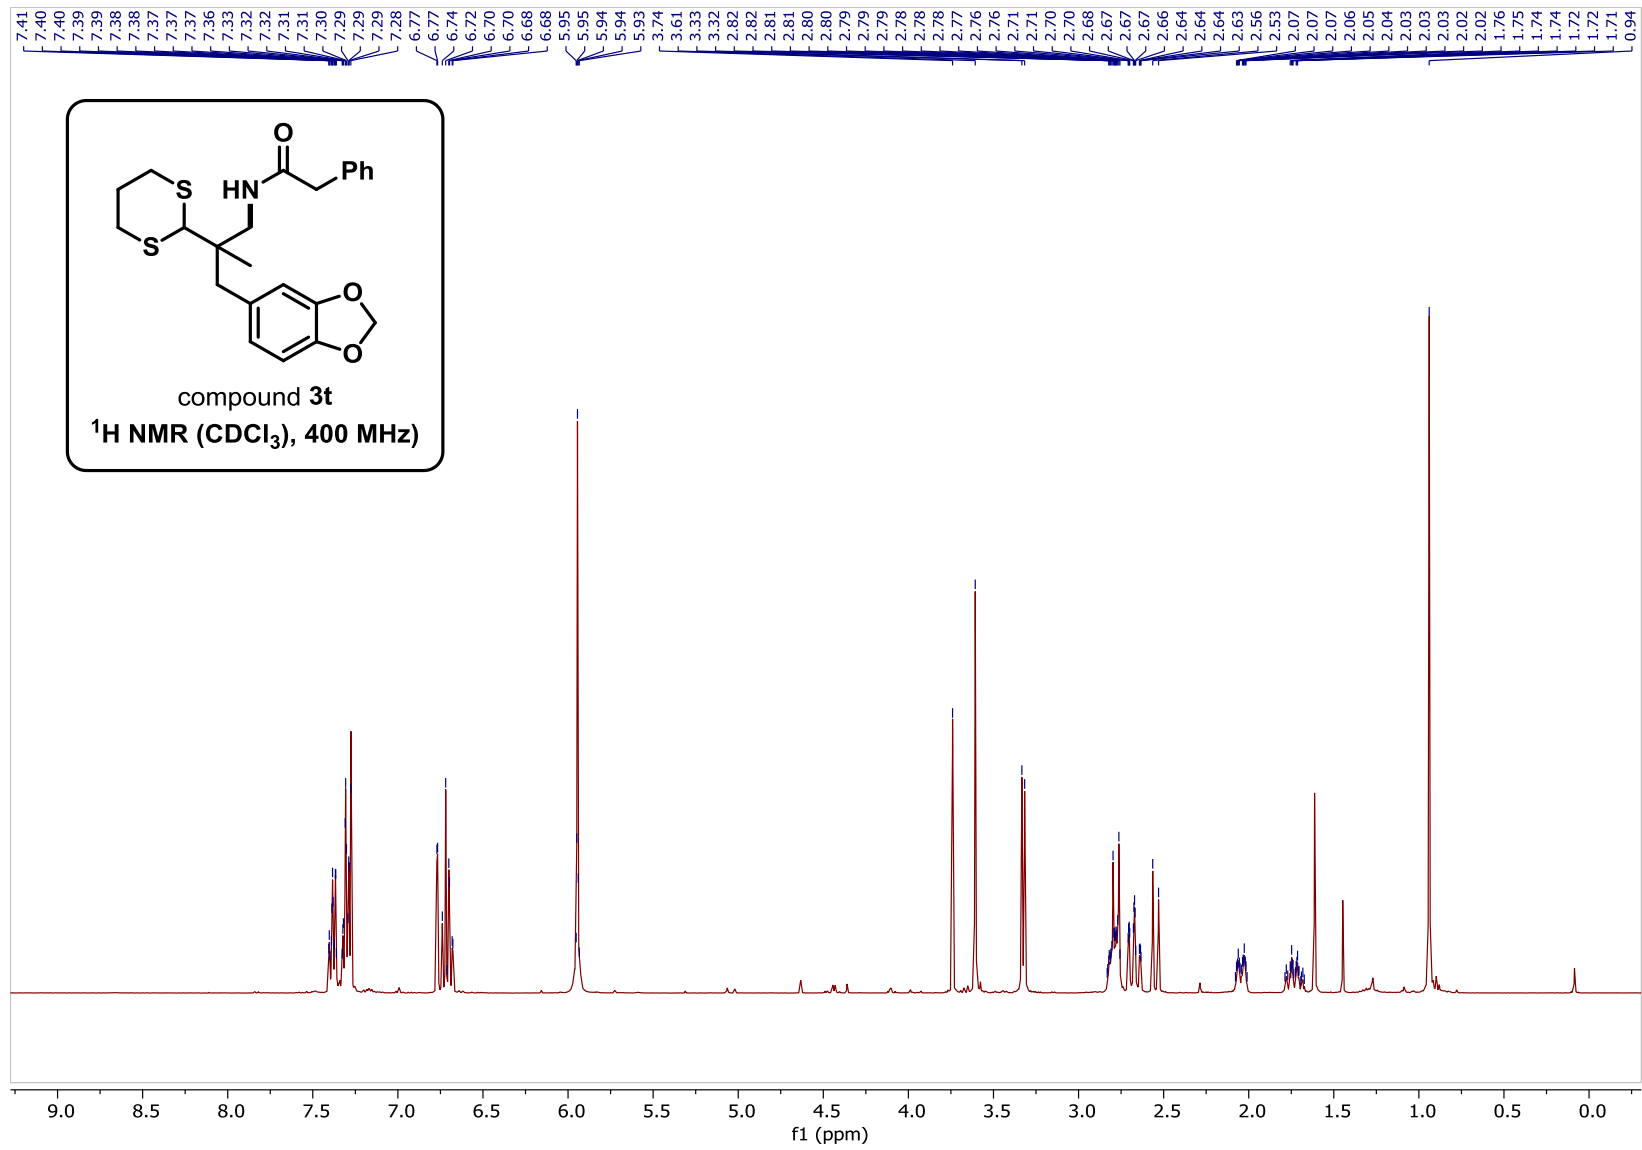

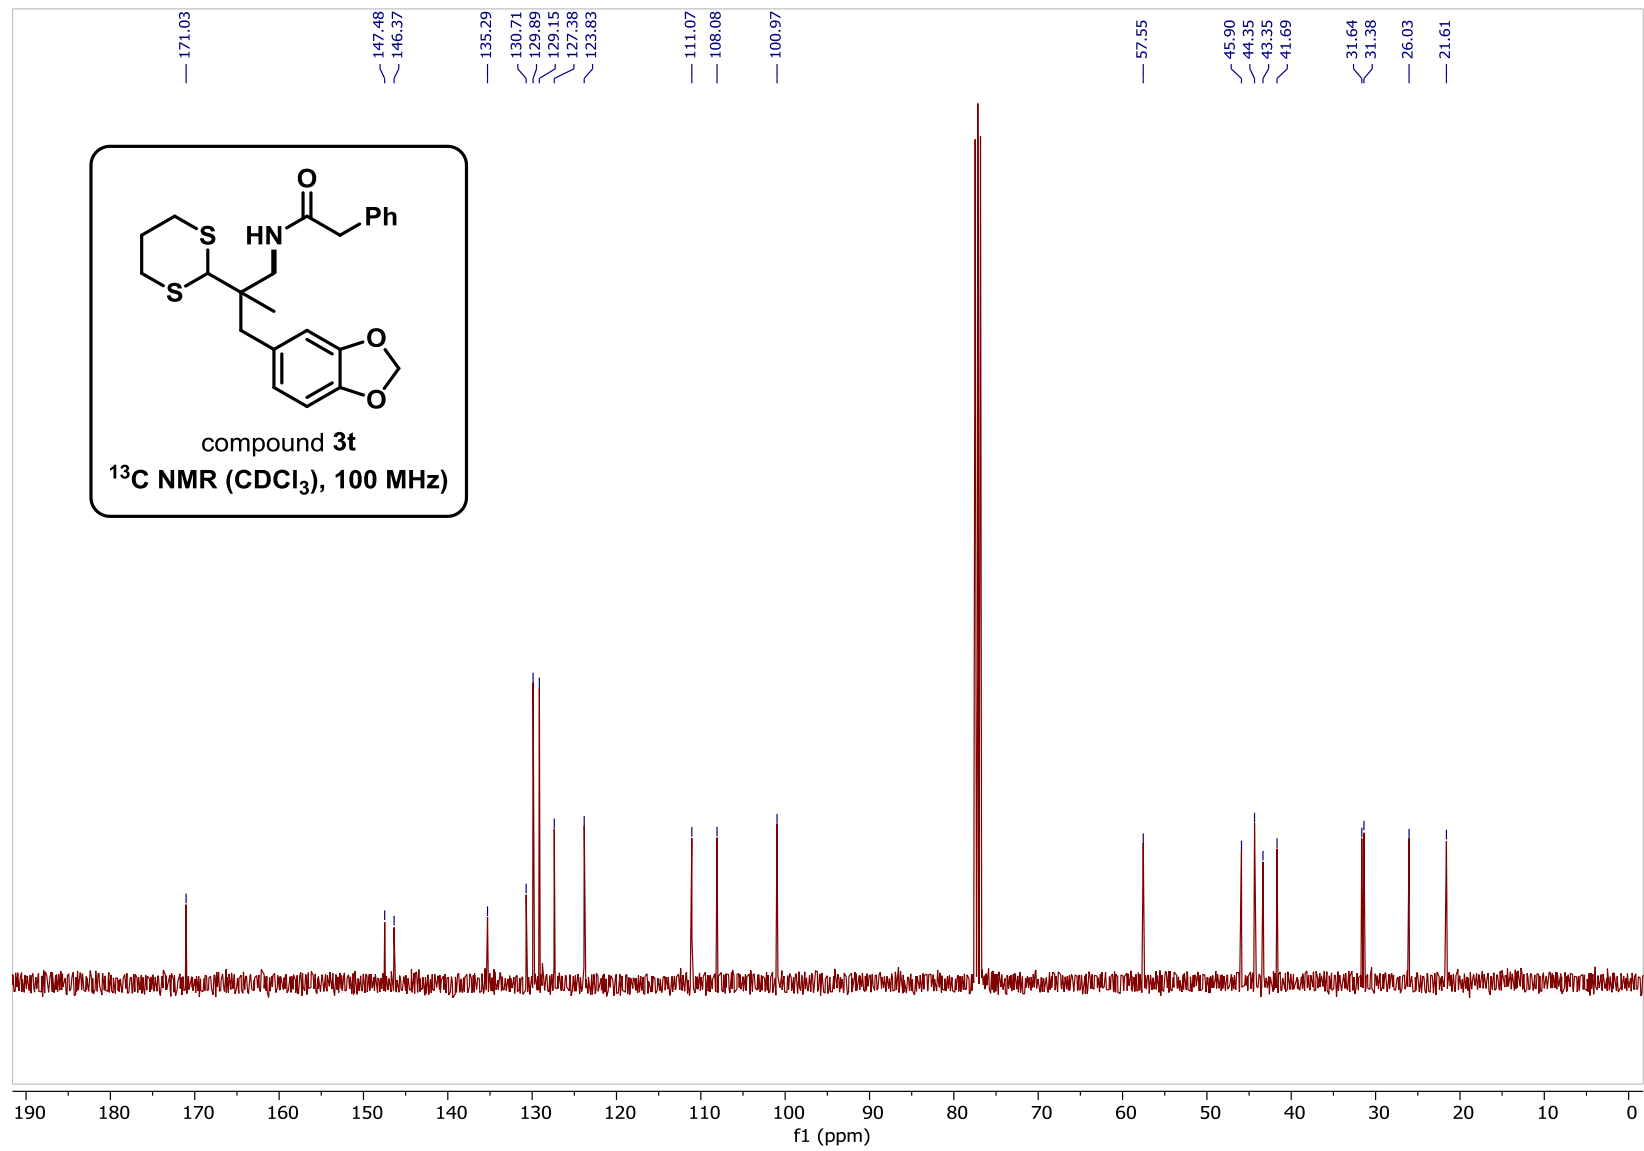

3.40. Compound 3u

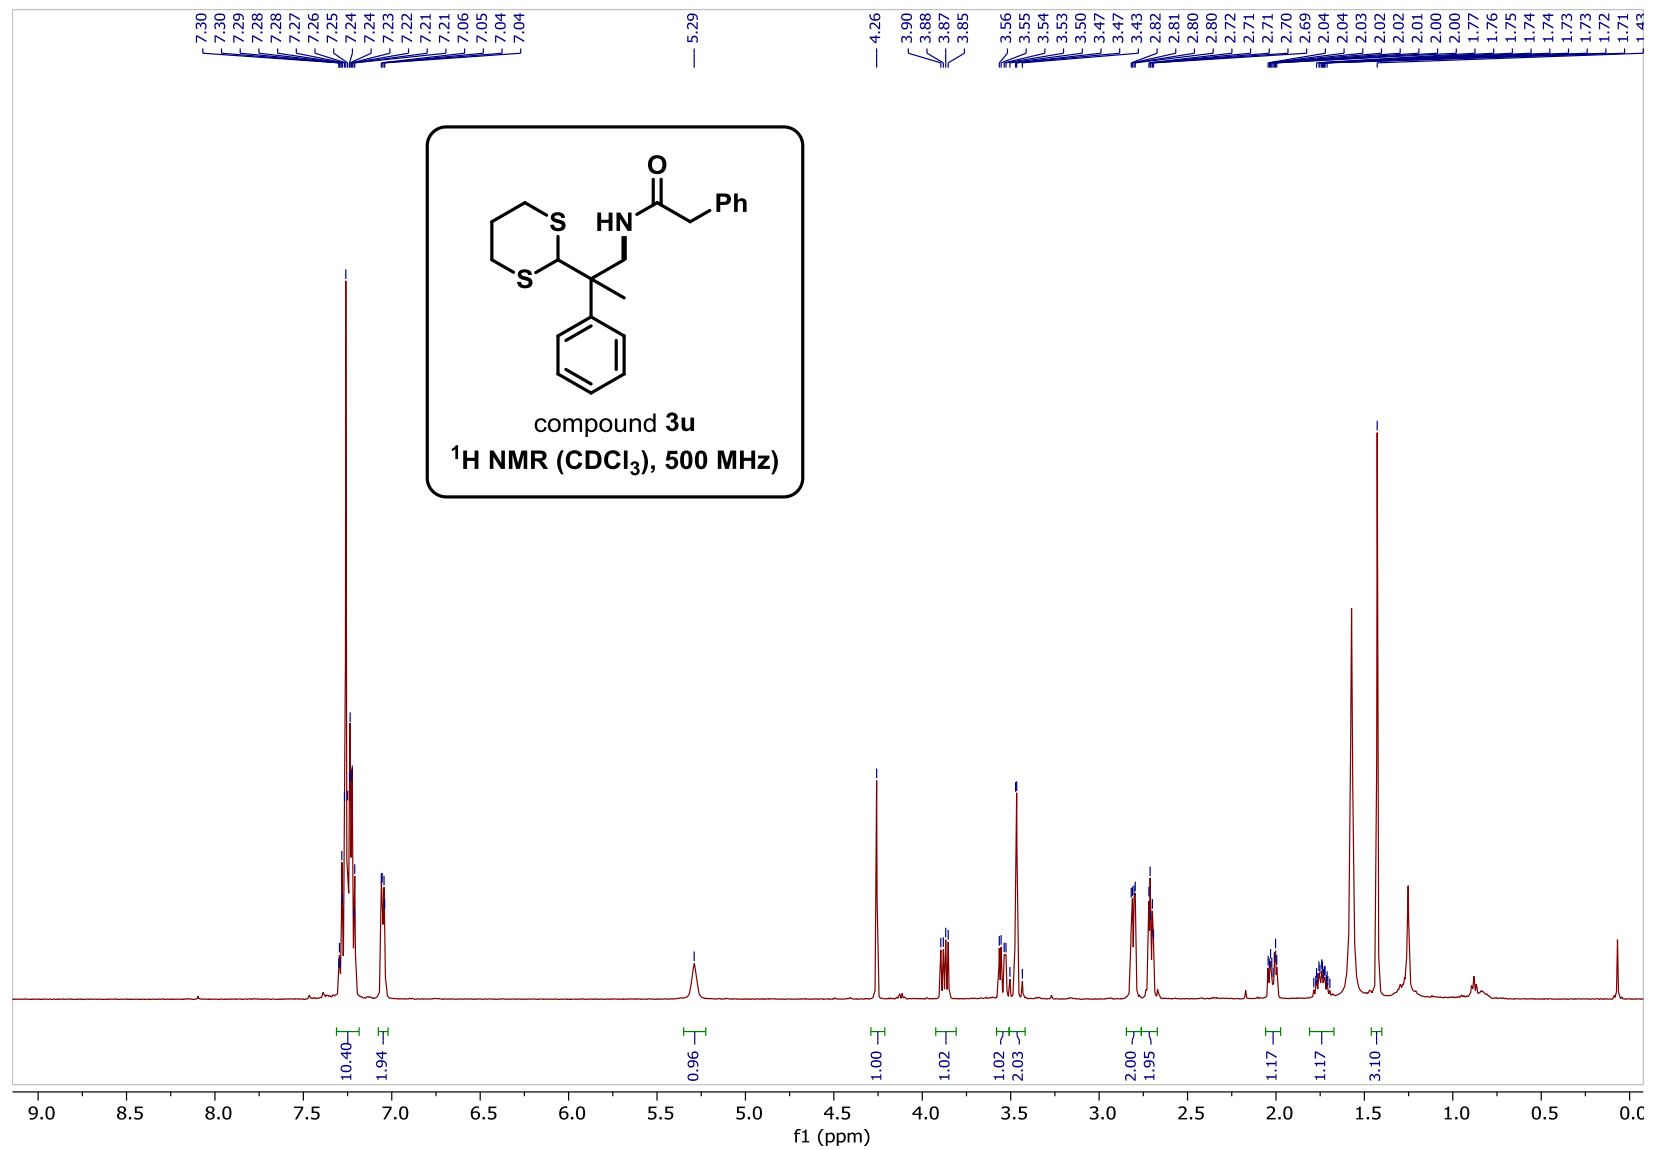

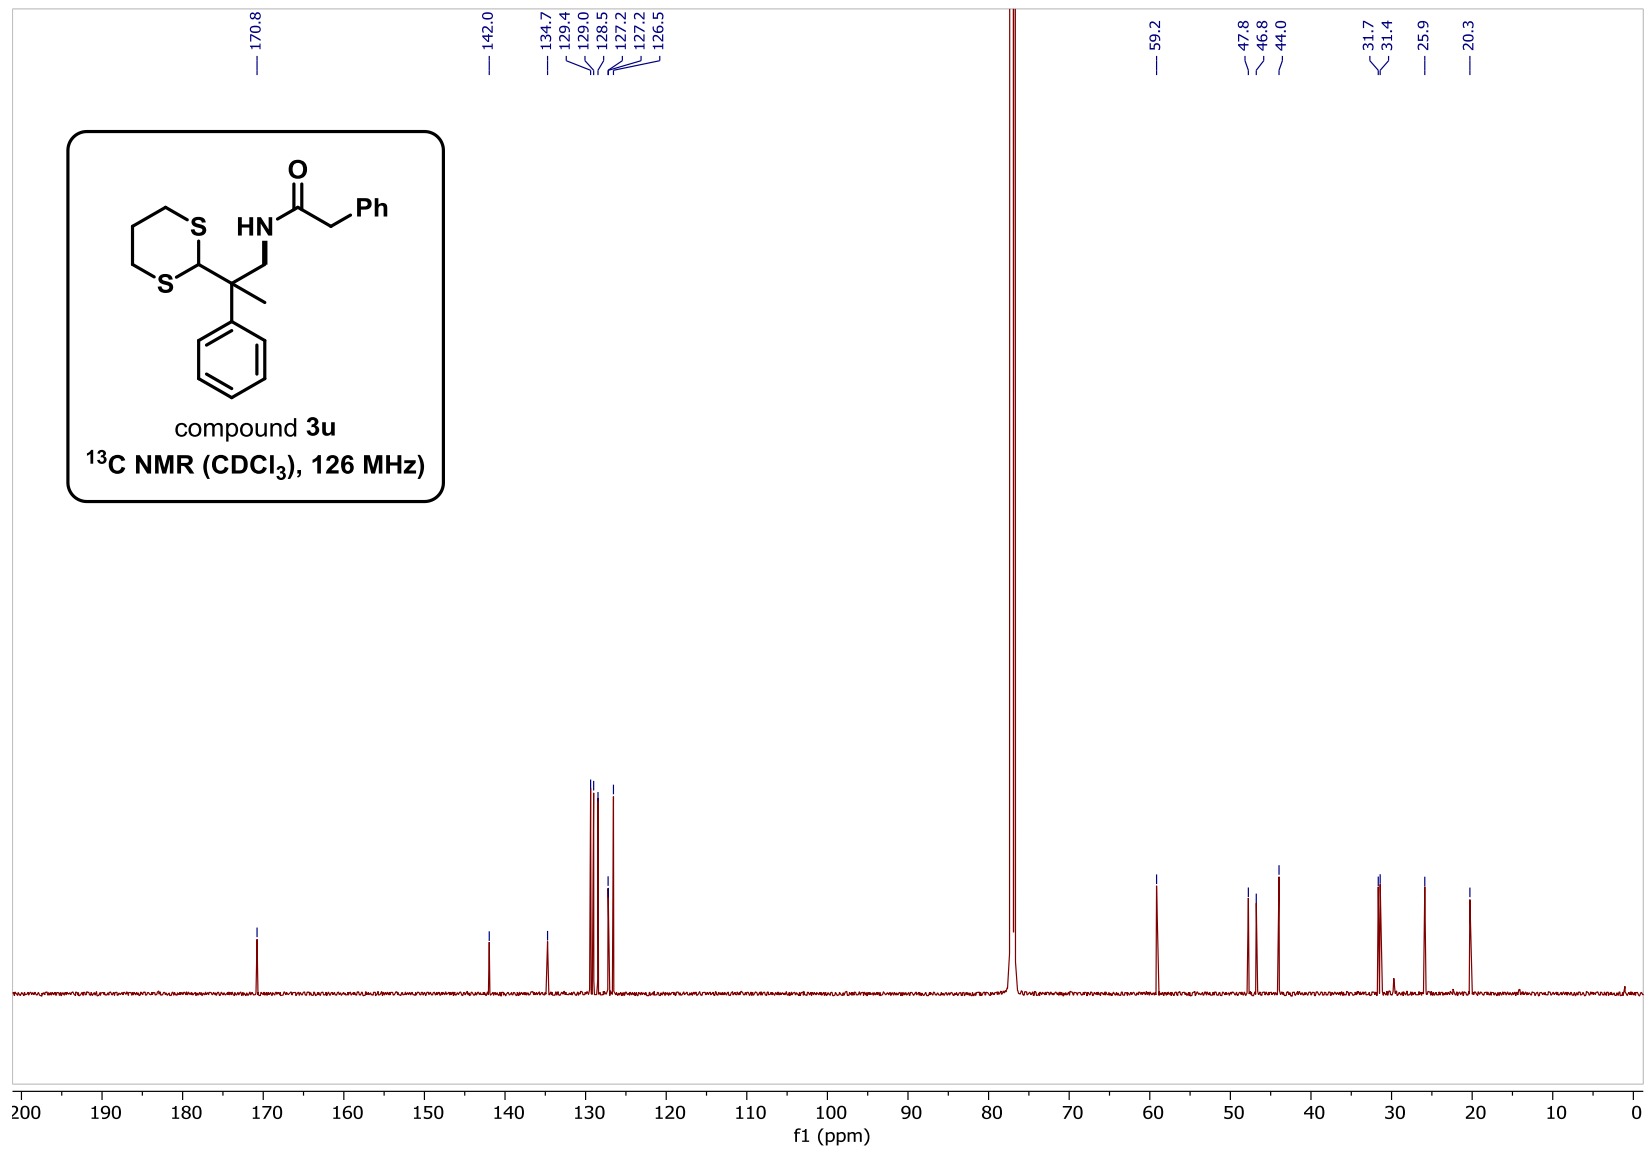



Compound 3v

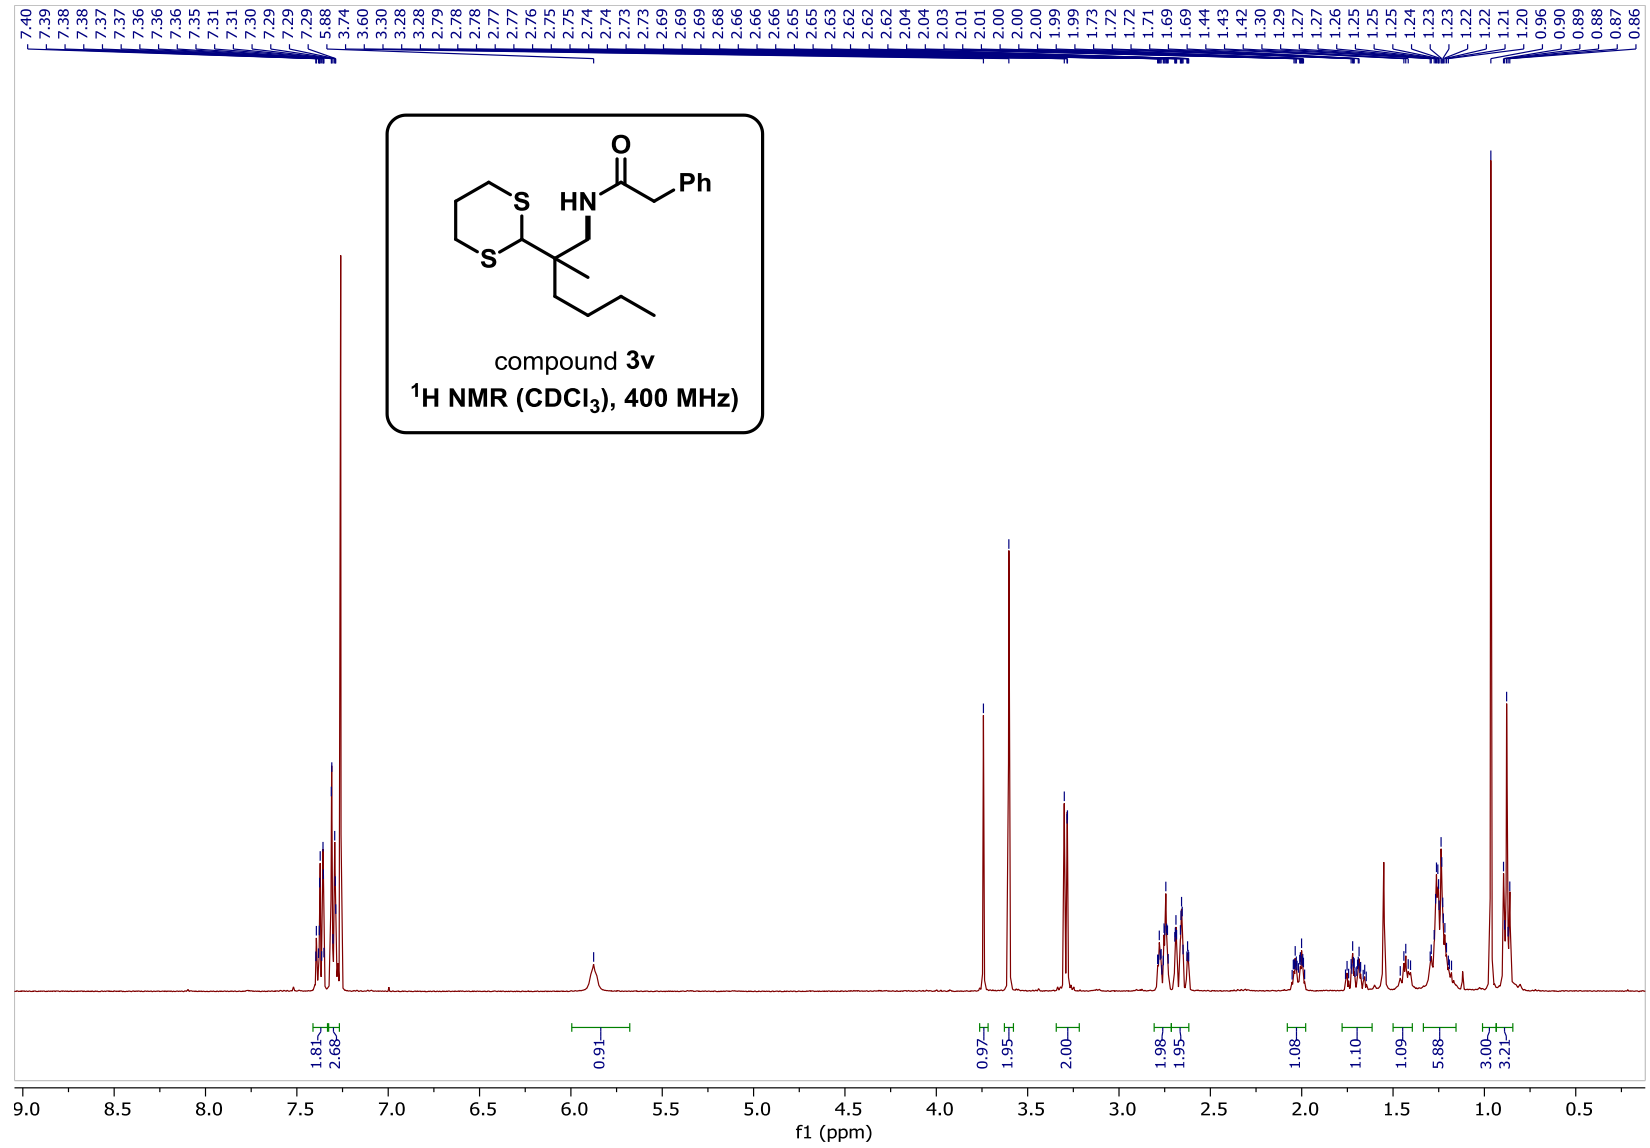

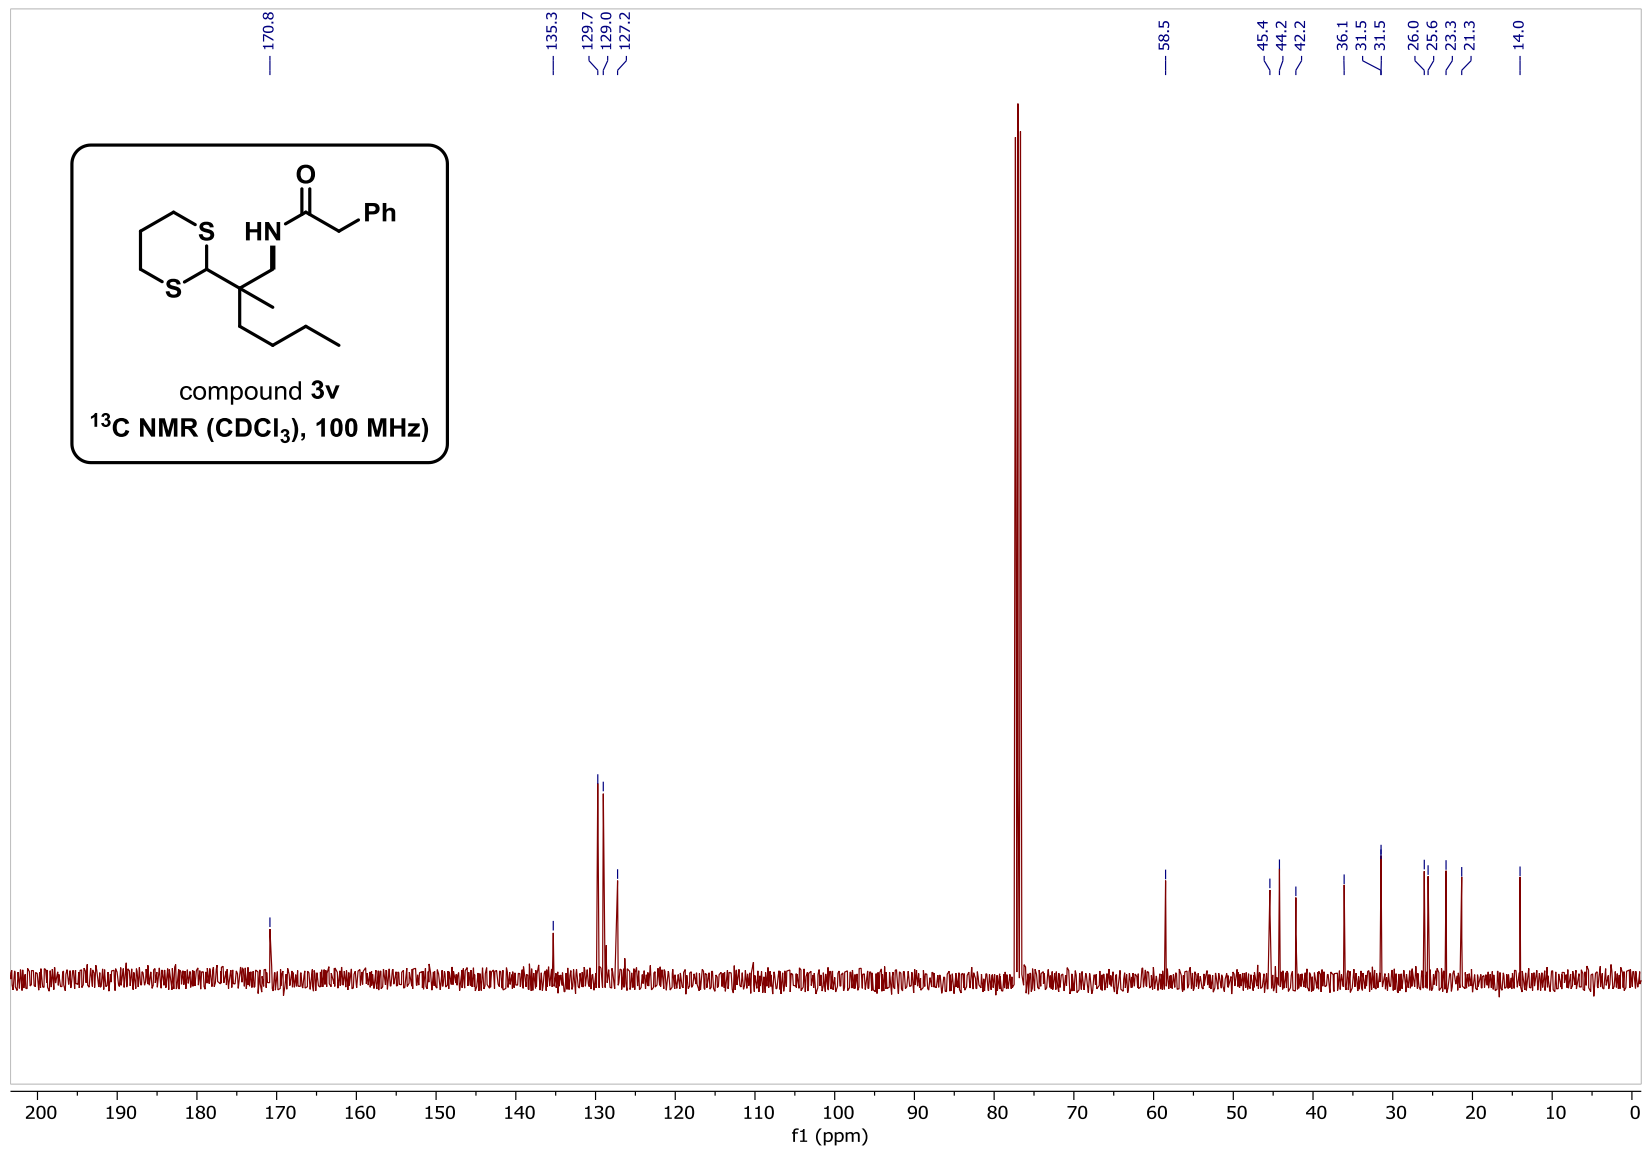

3.41. Compound 3w

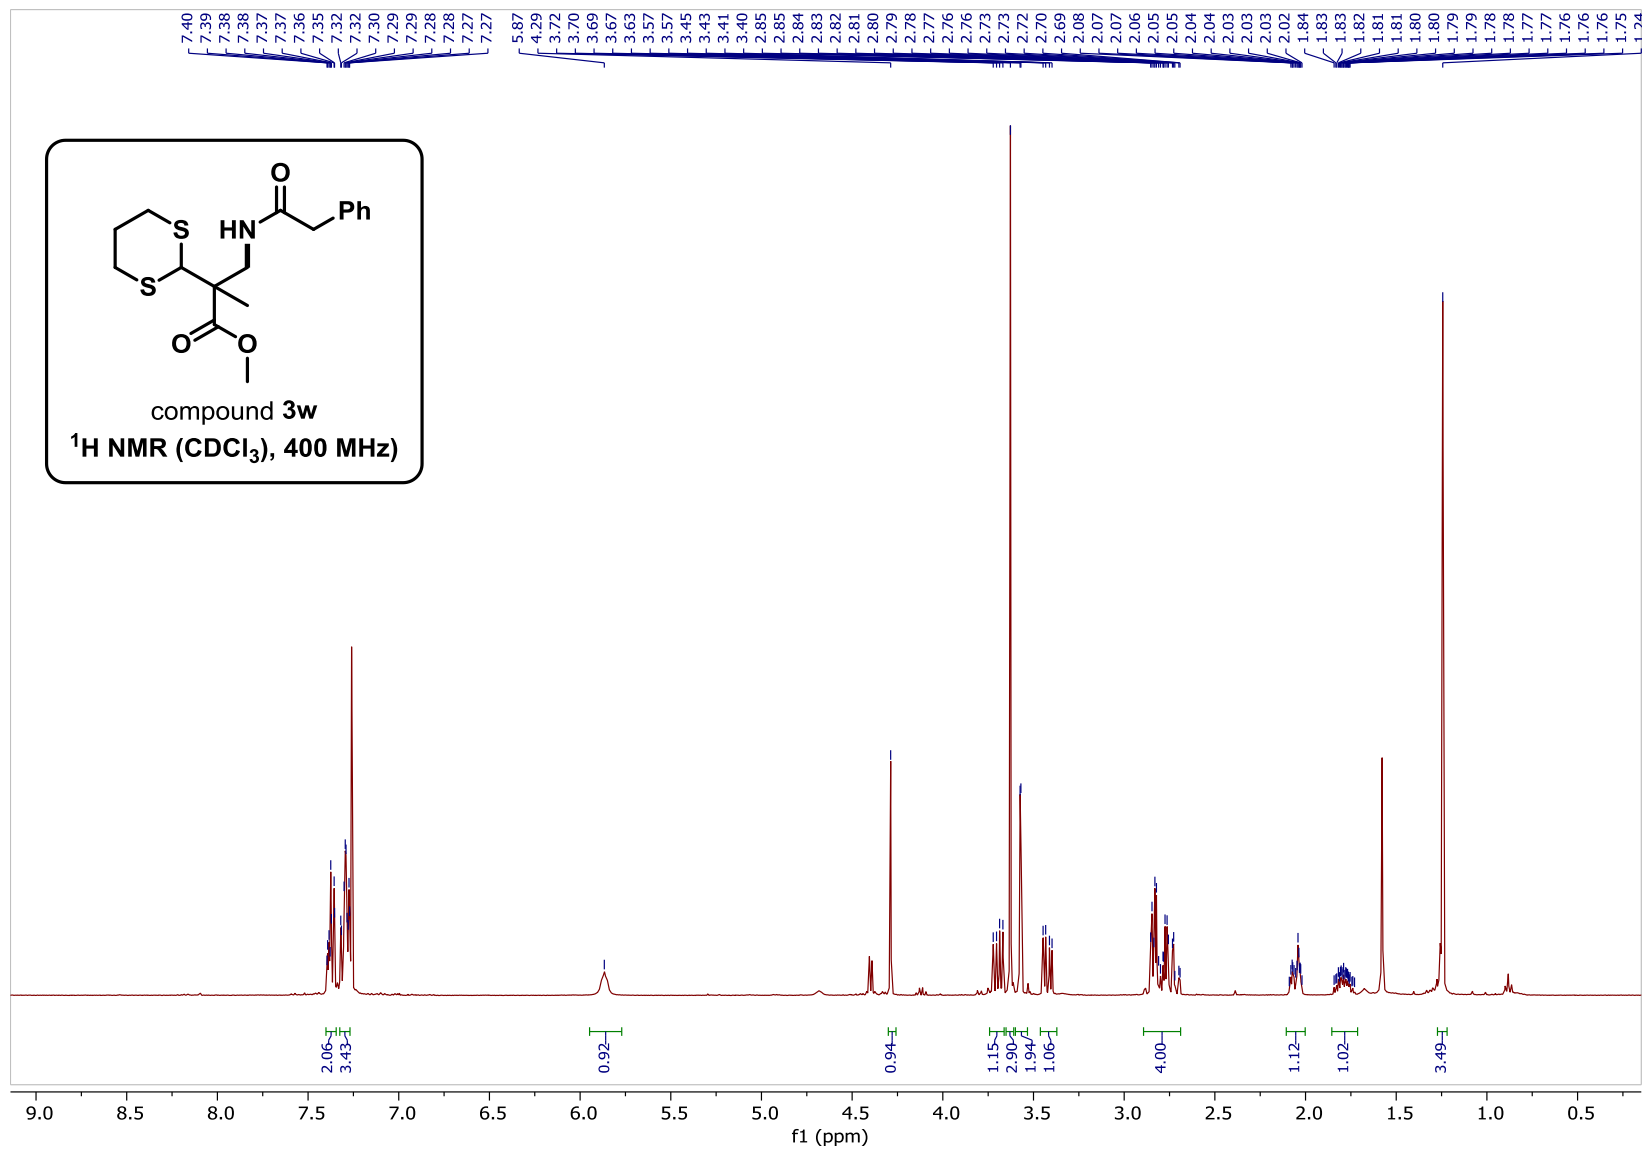

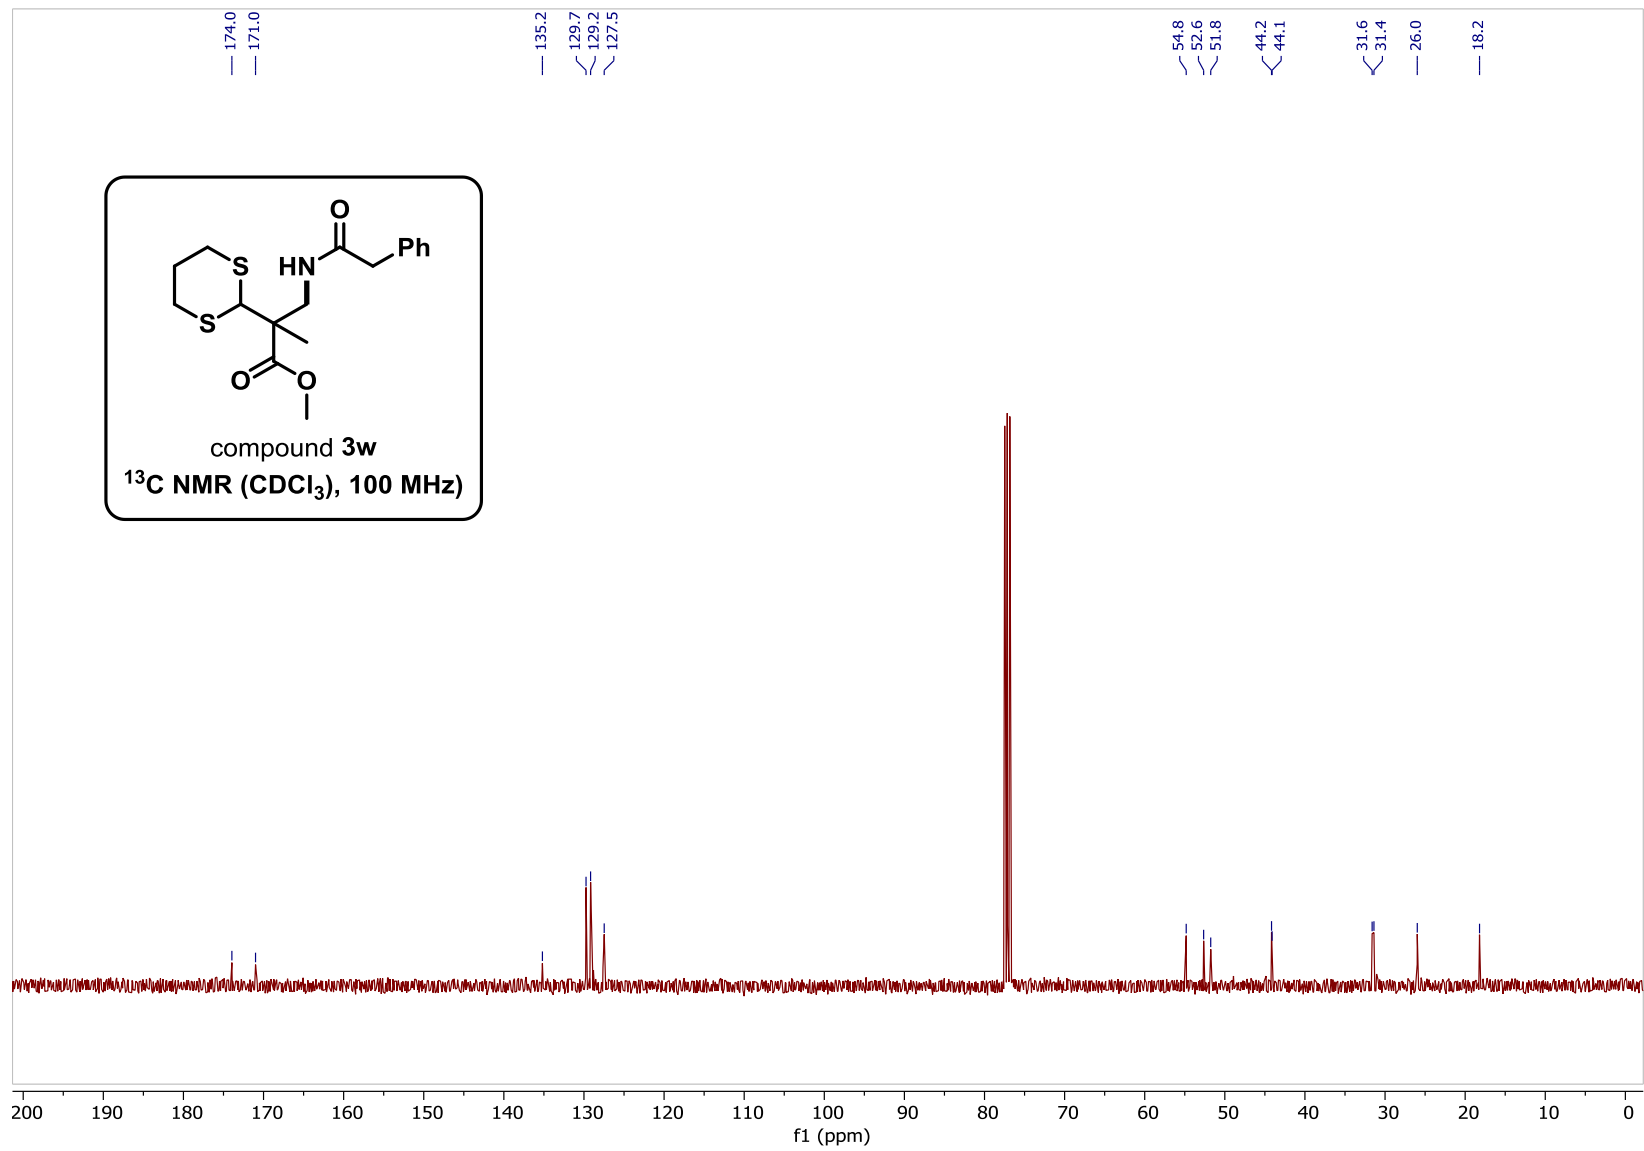

3.42. Compound 3x

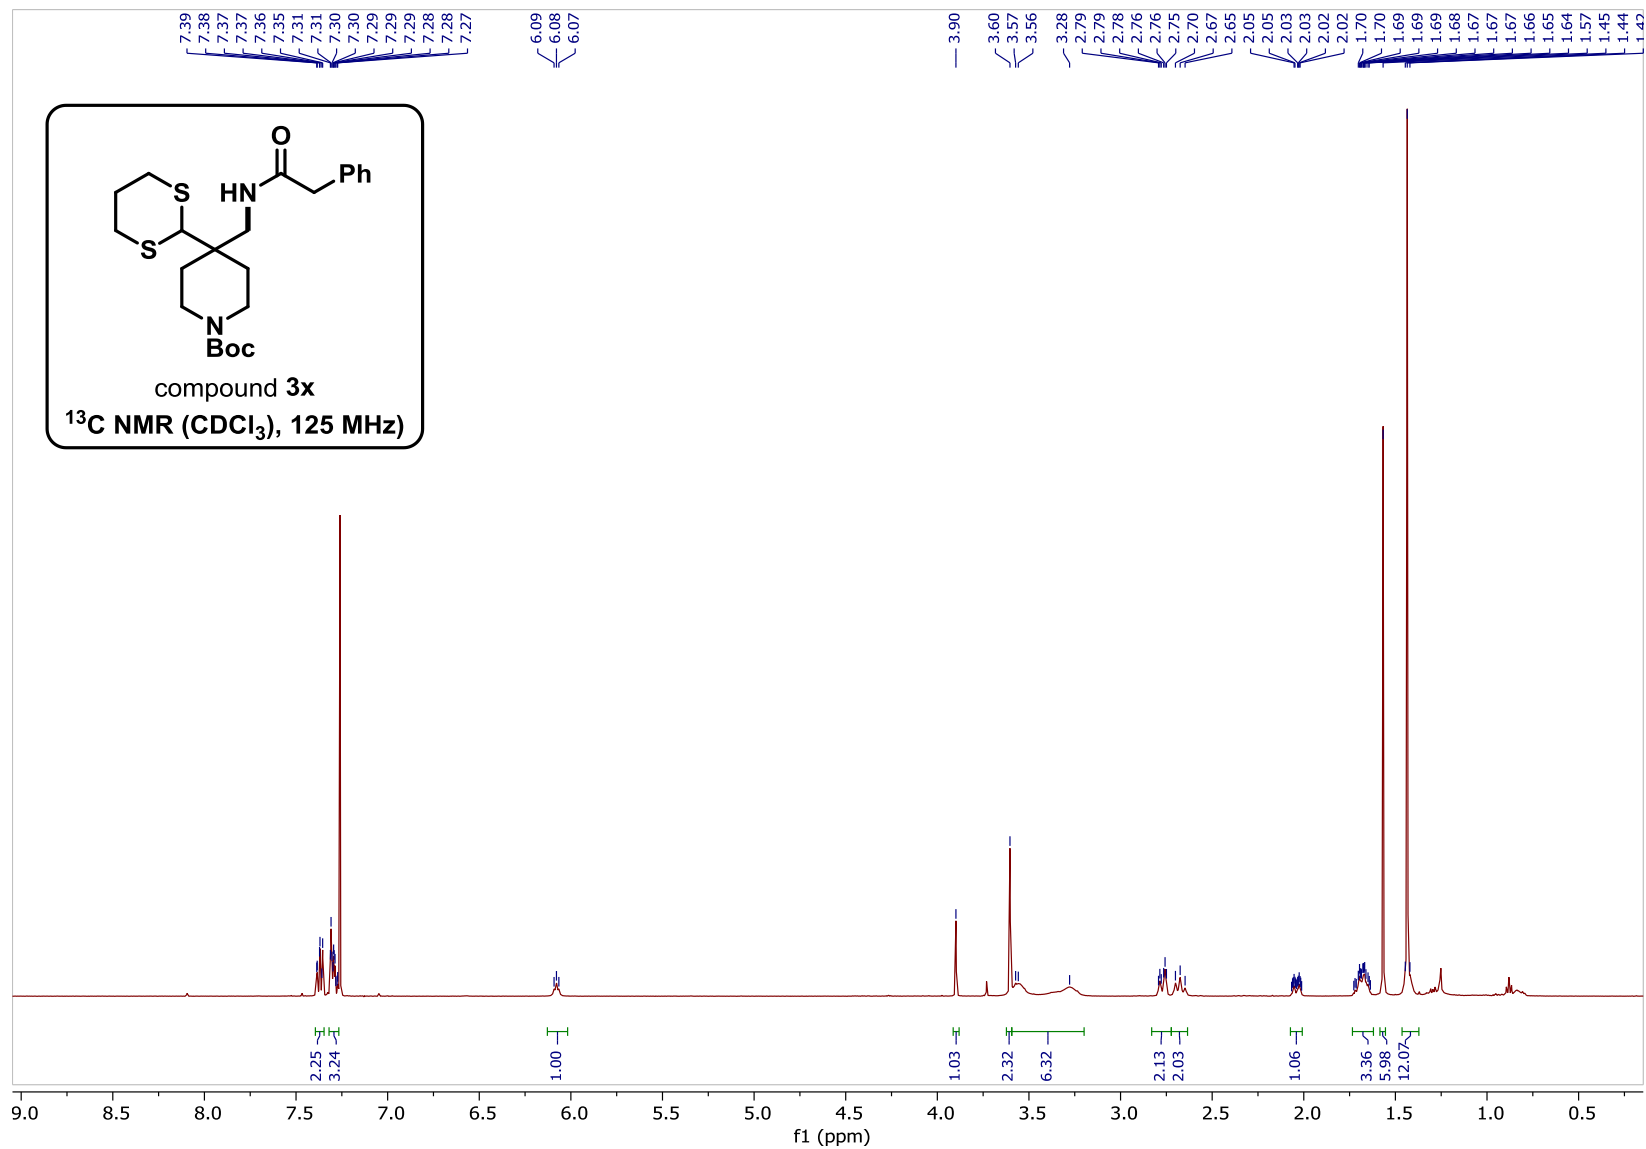

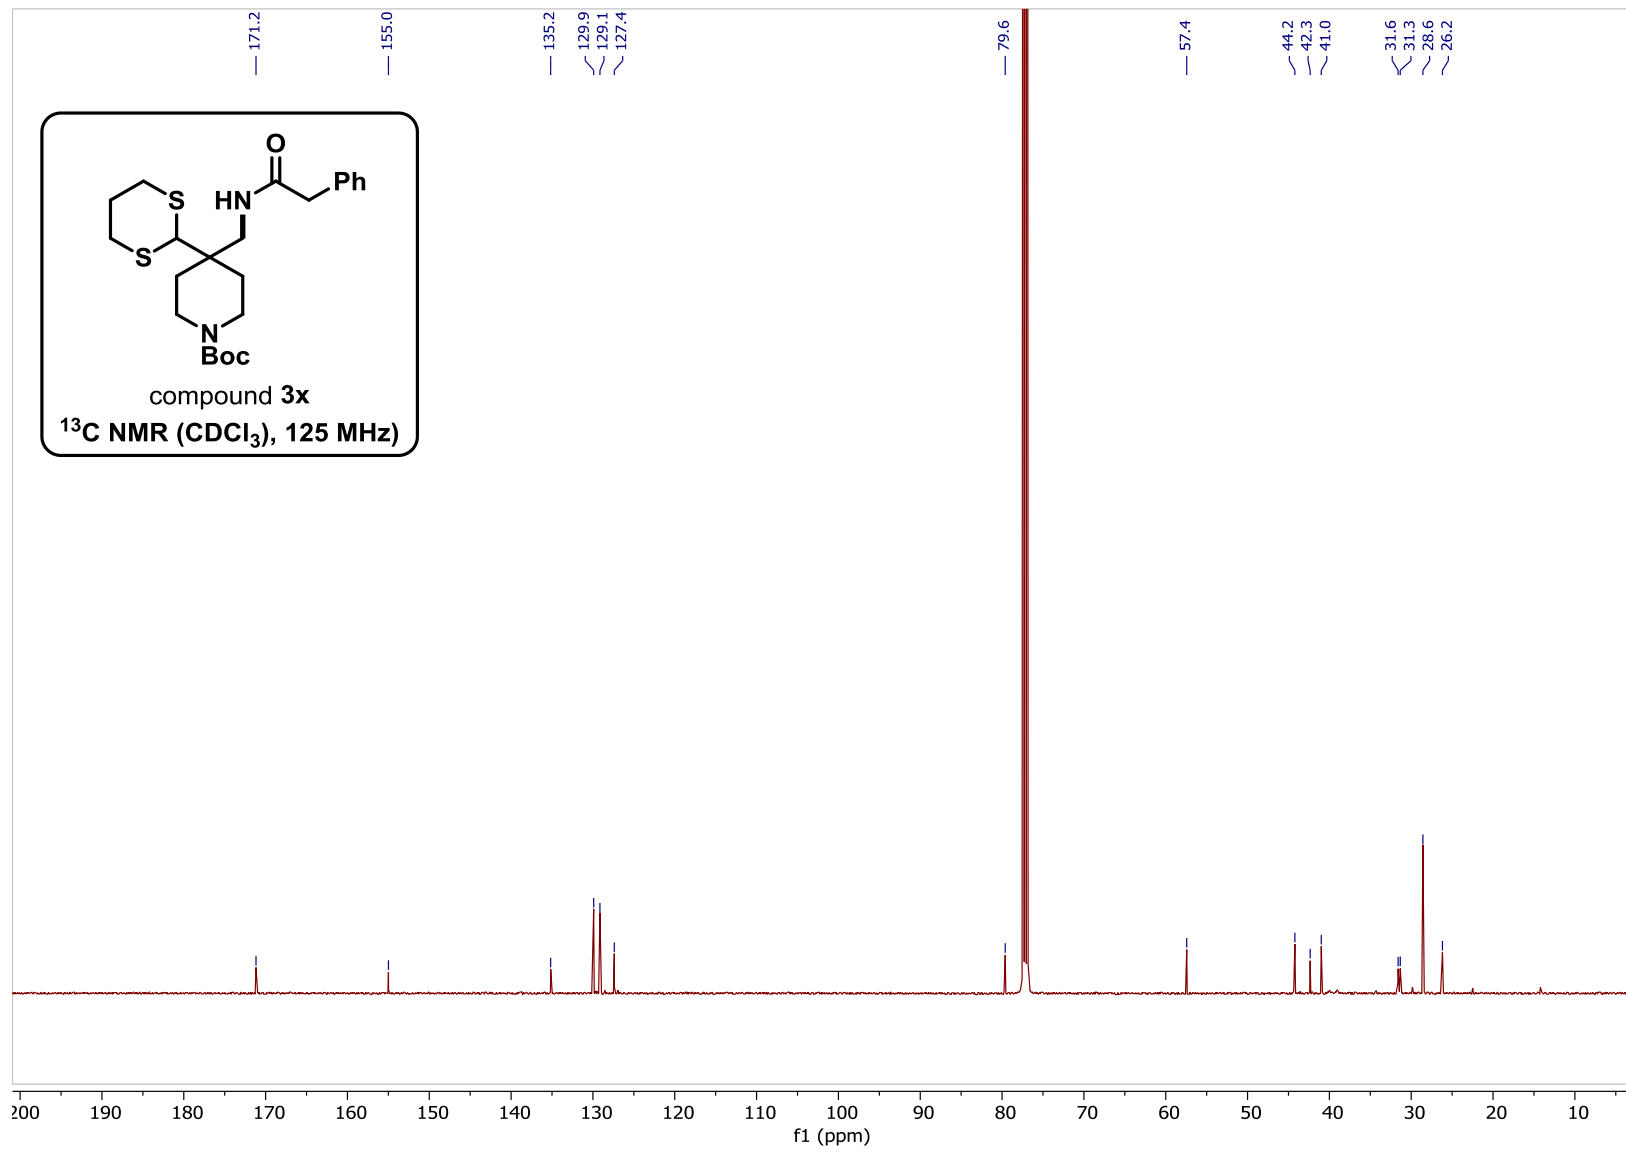

3.43. Compound 6

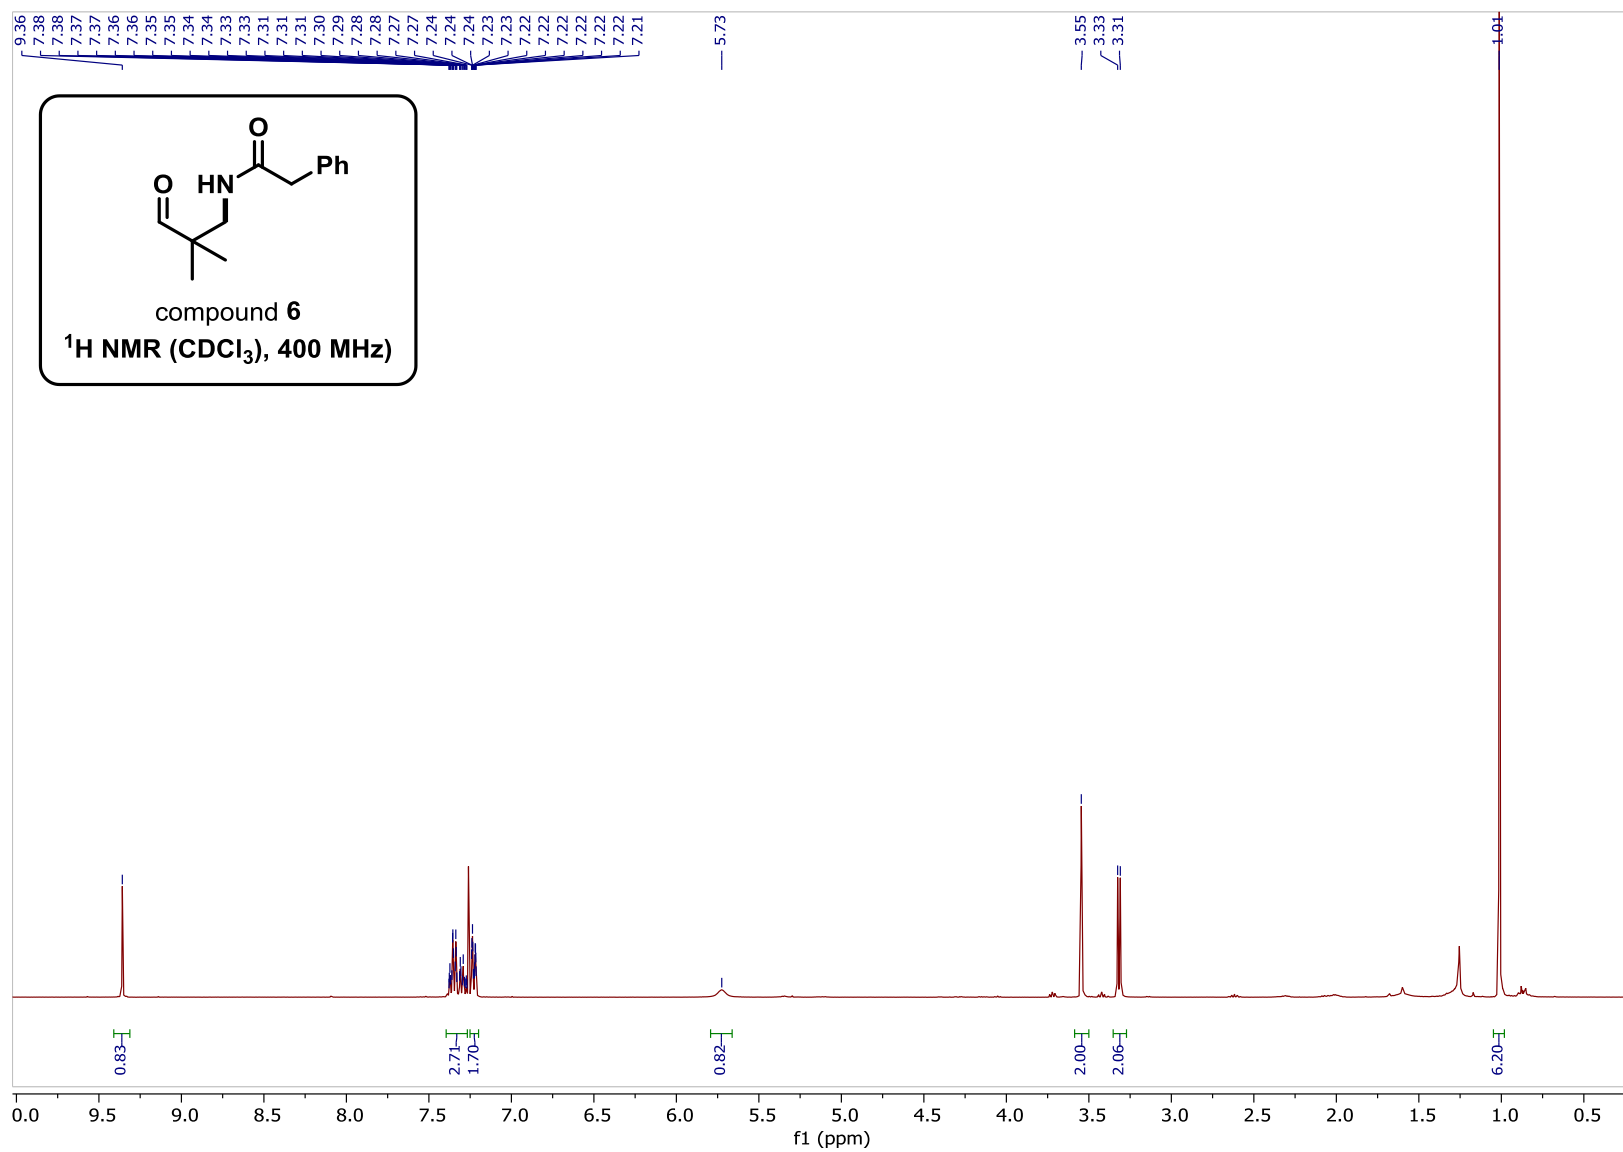

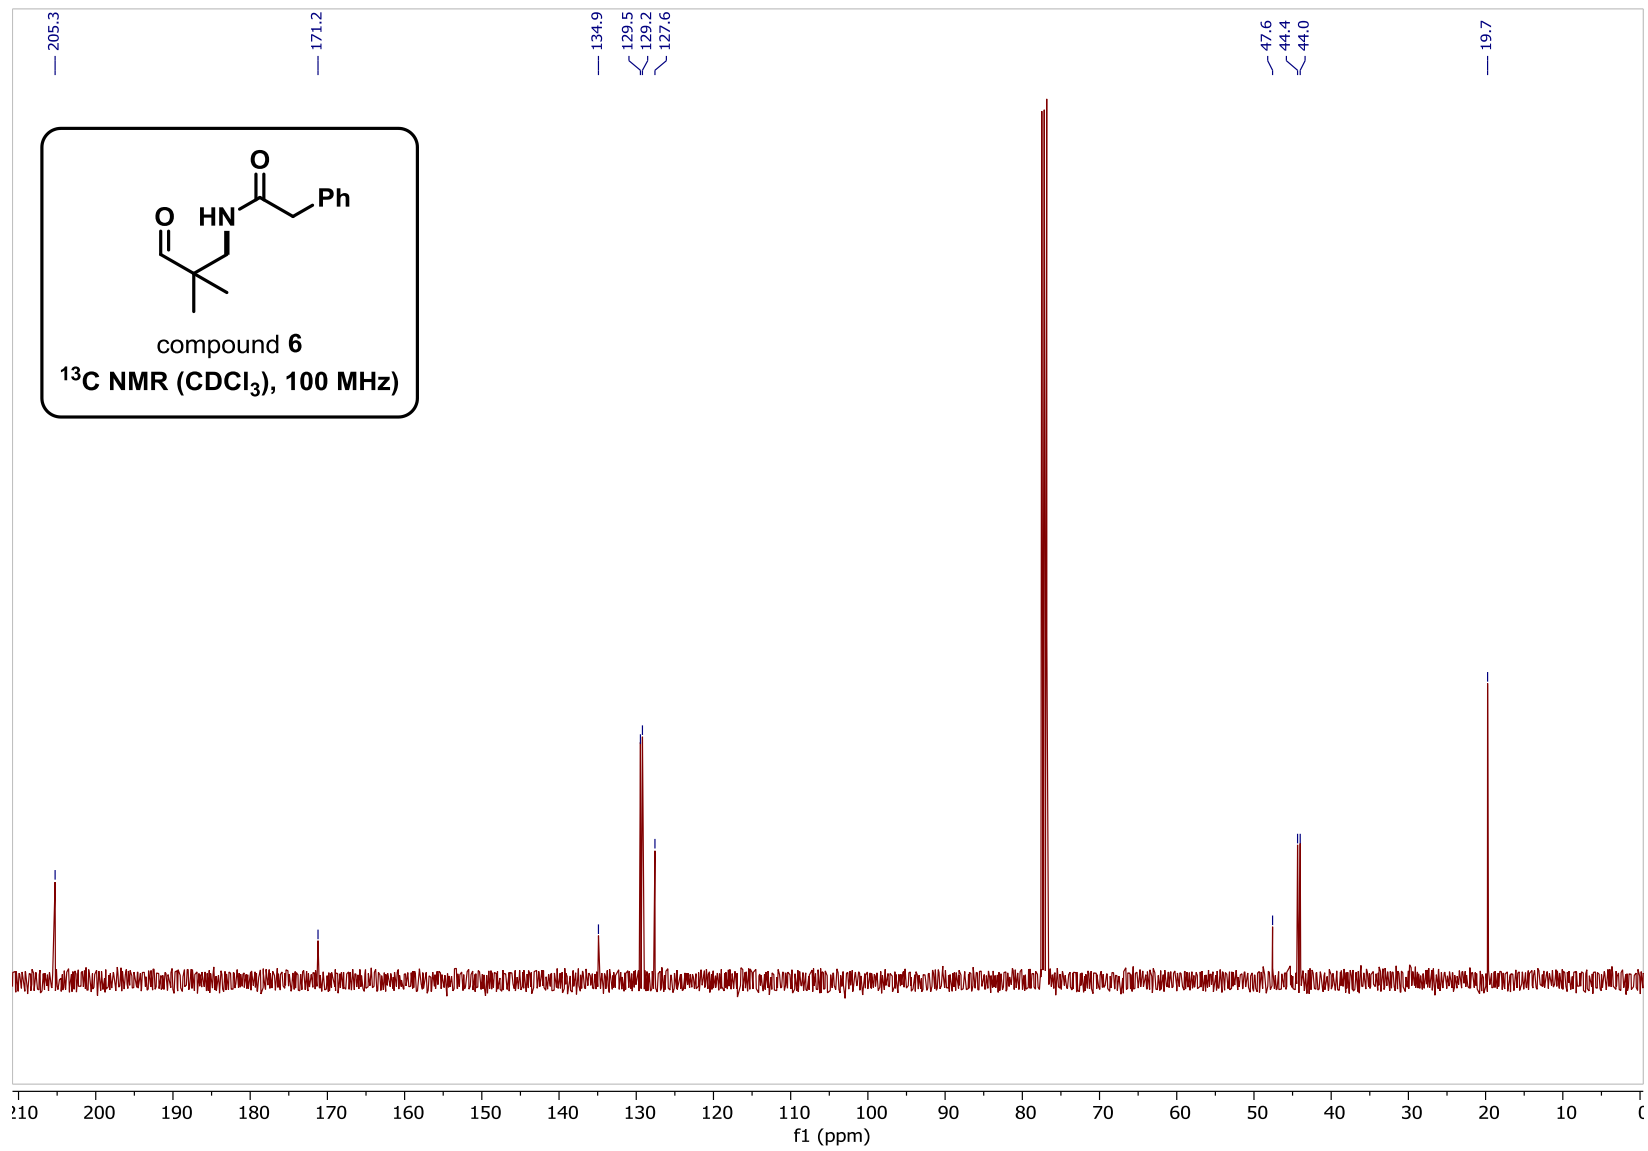



3.44. Compound 7

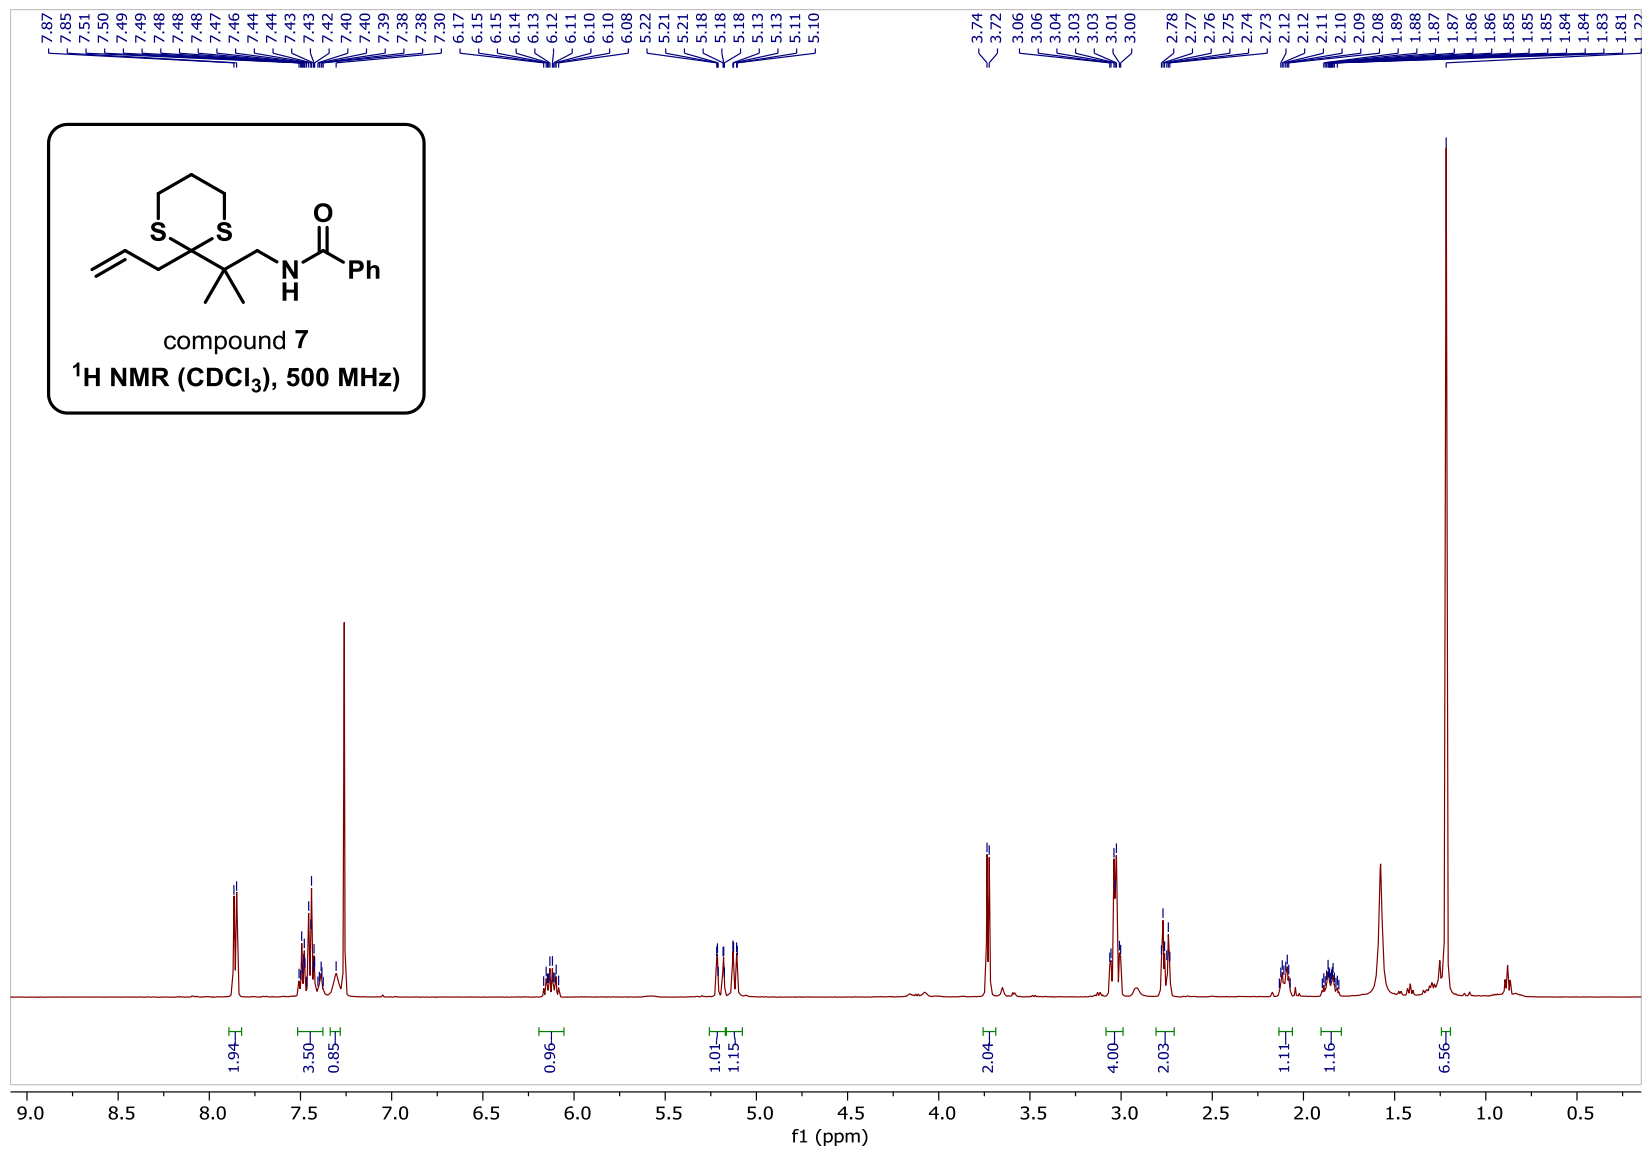

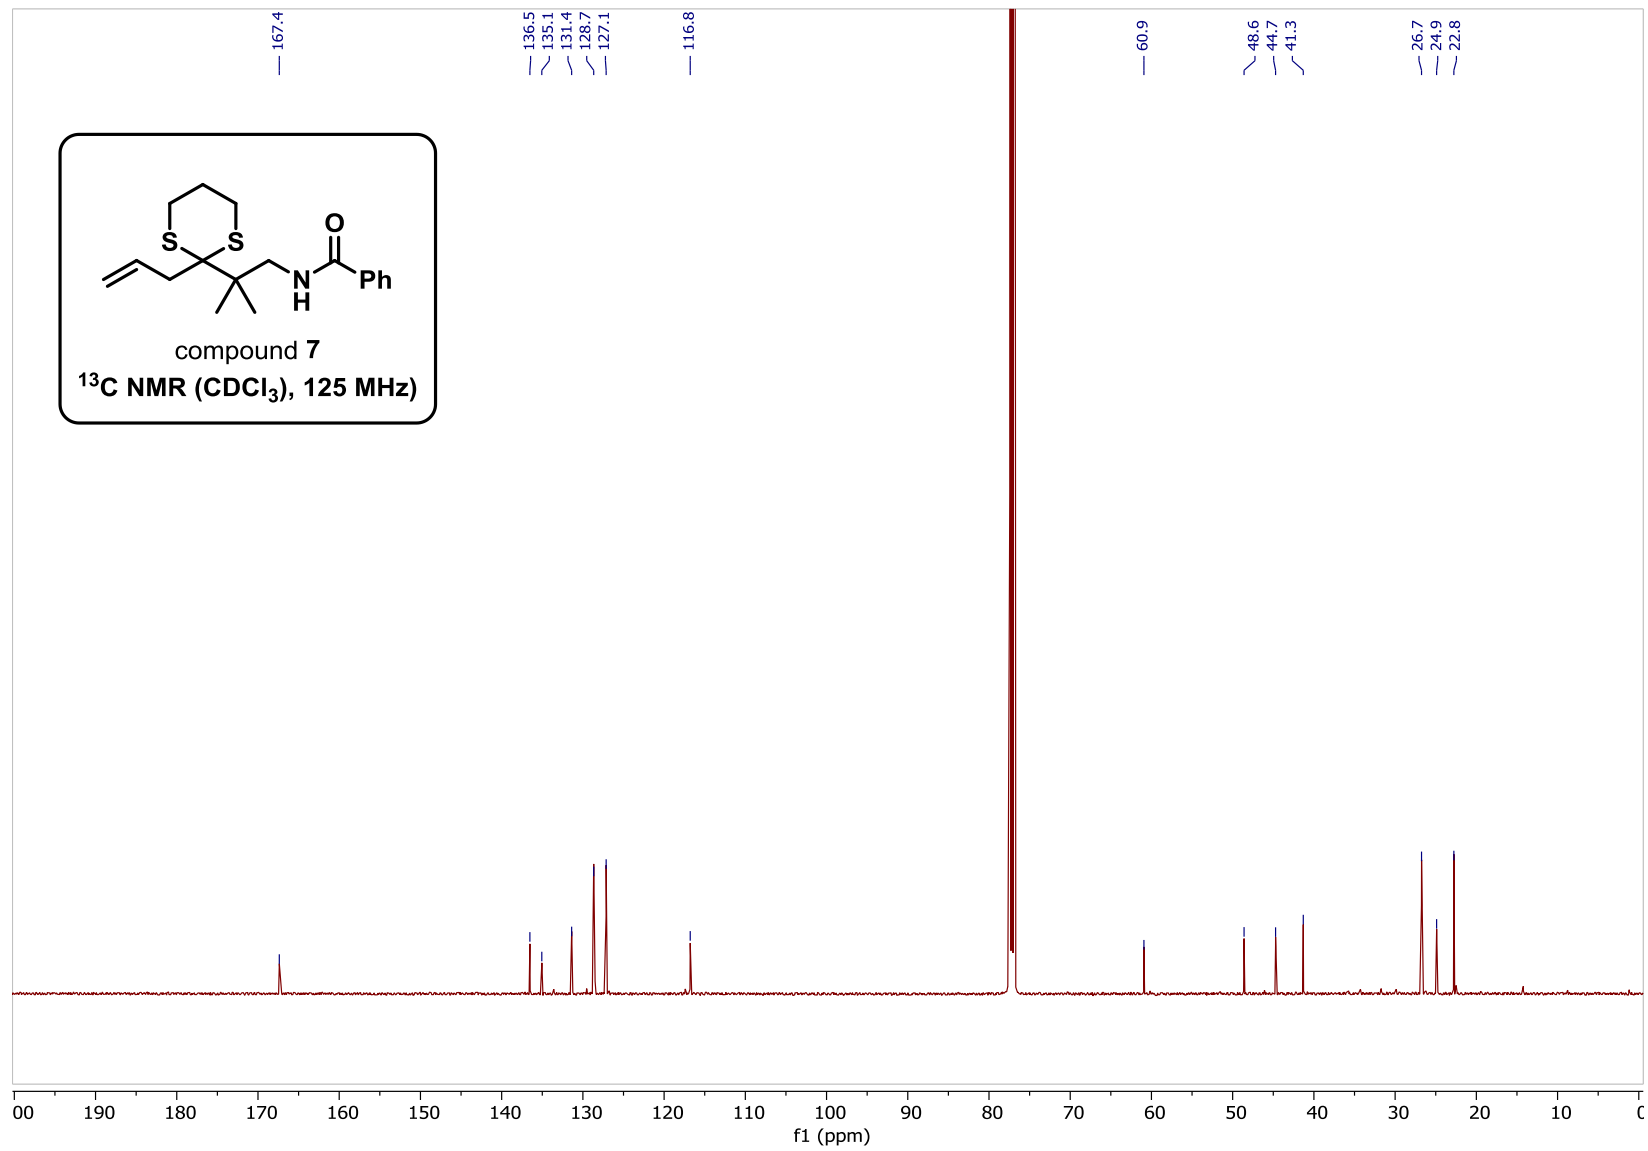

3.45. Compound 8

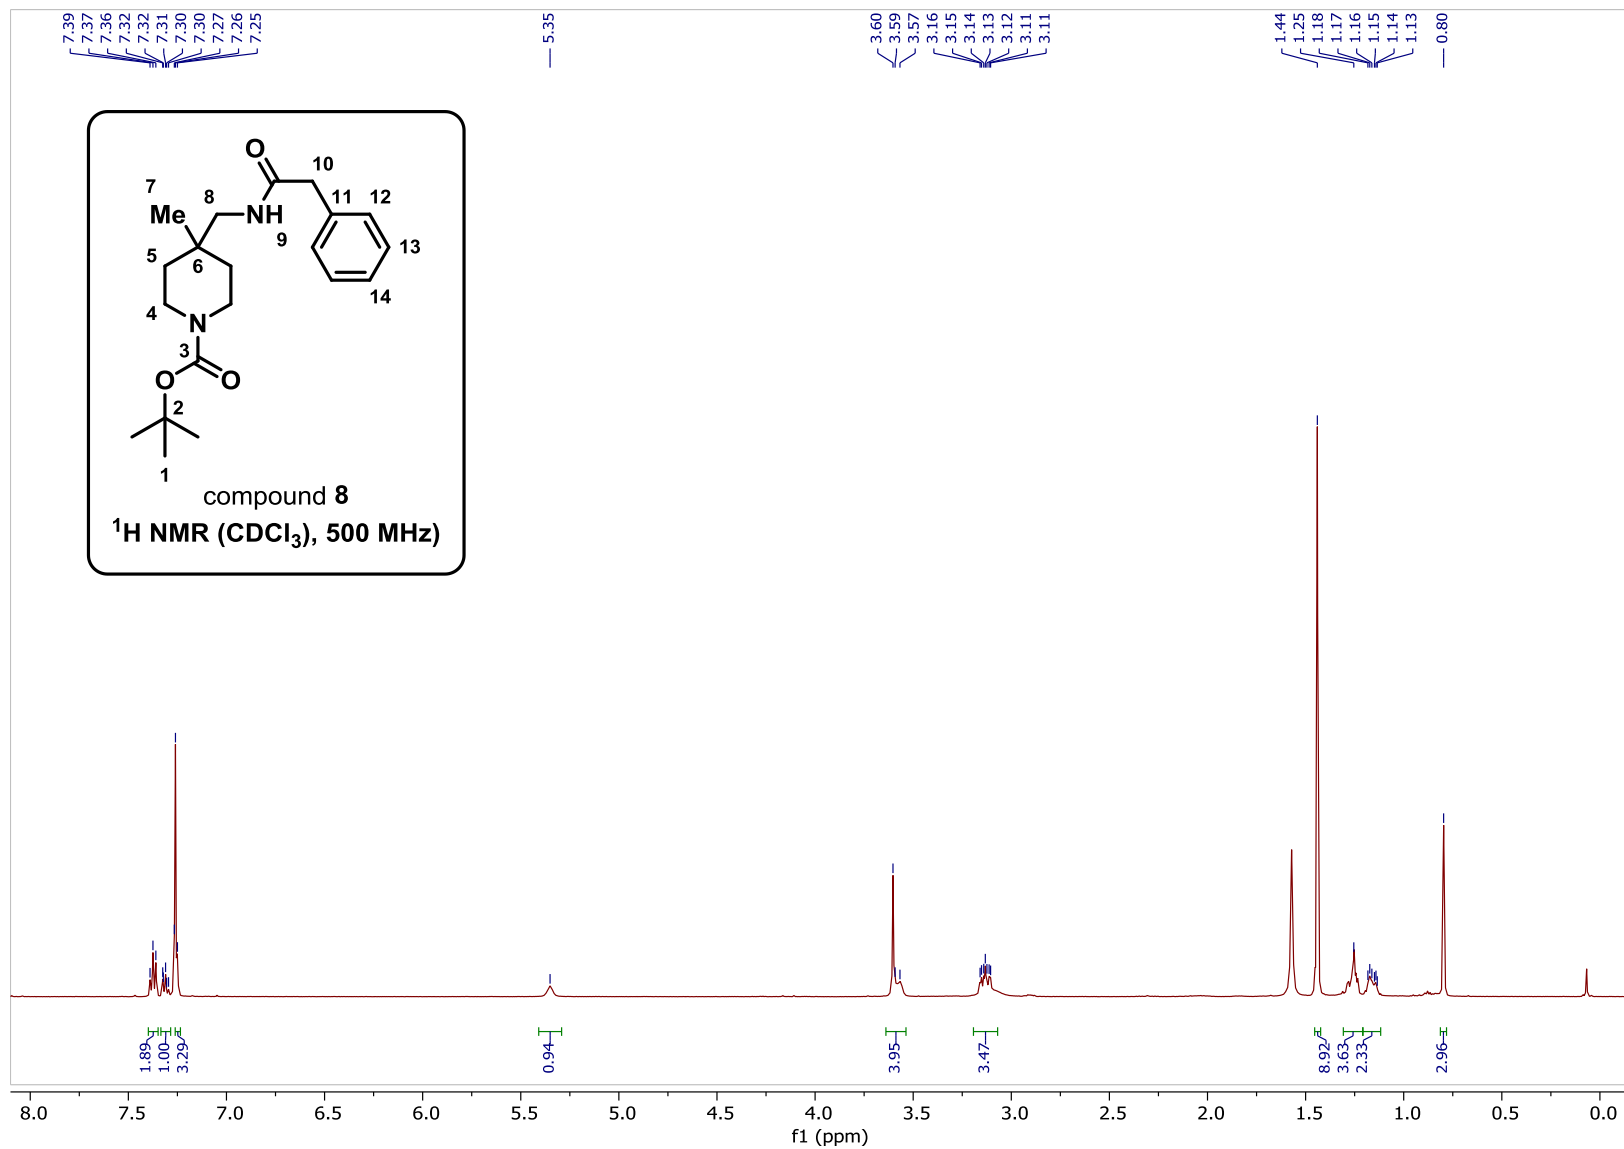

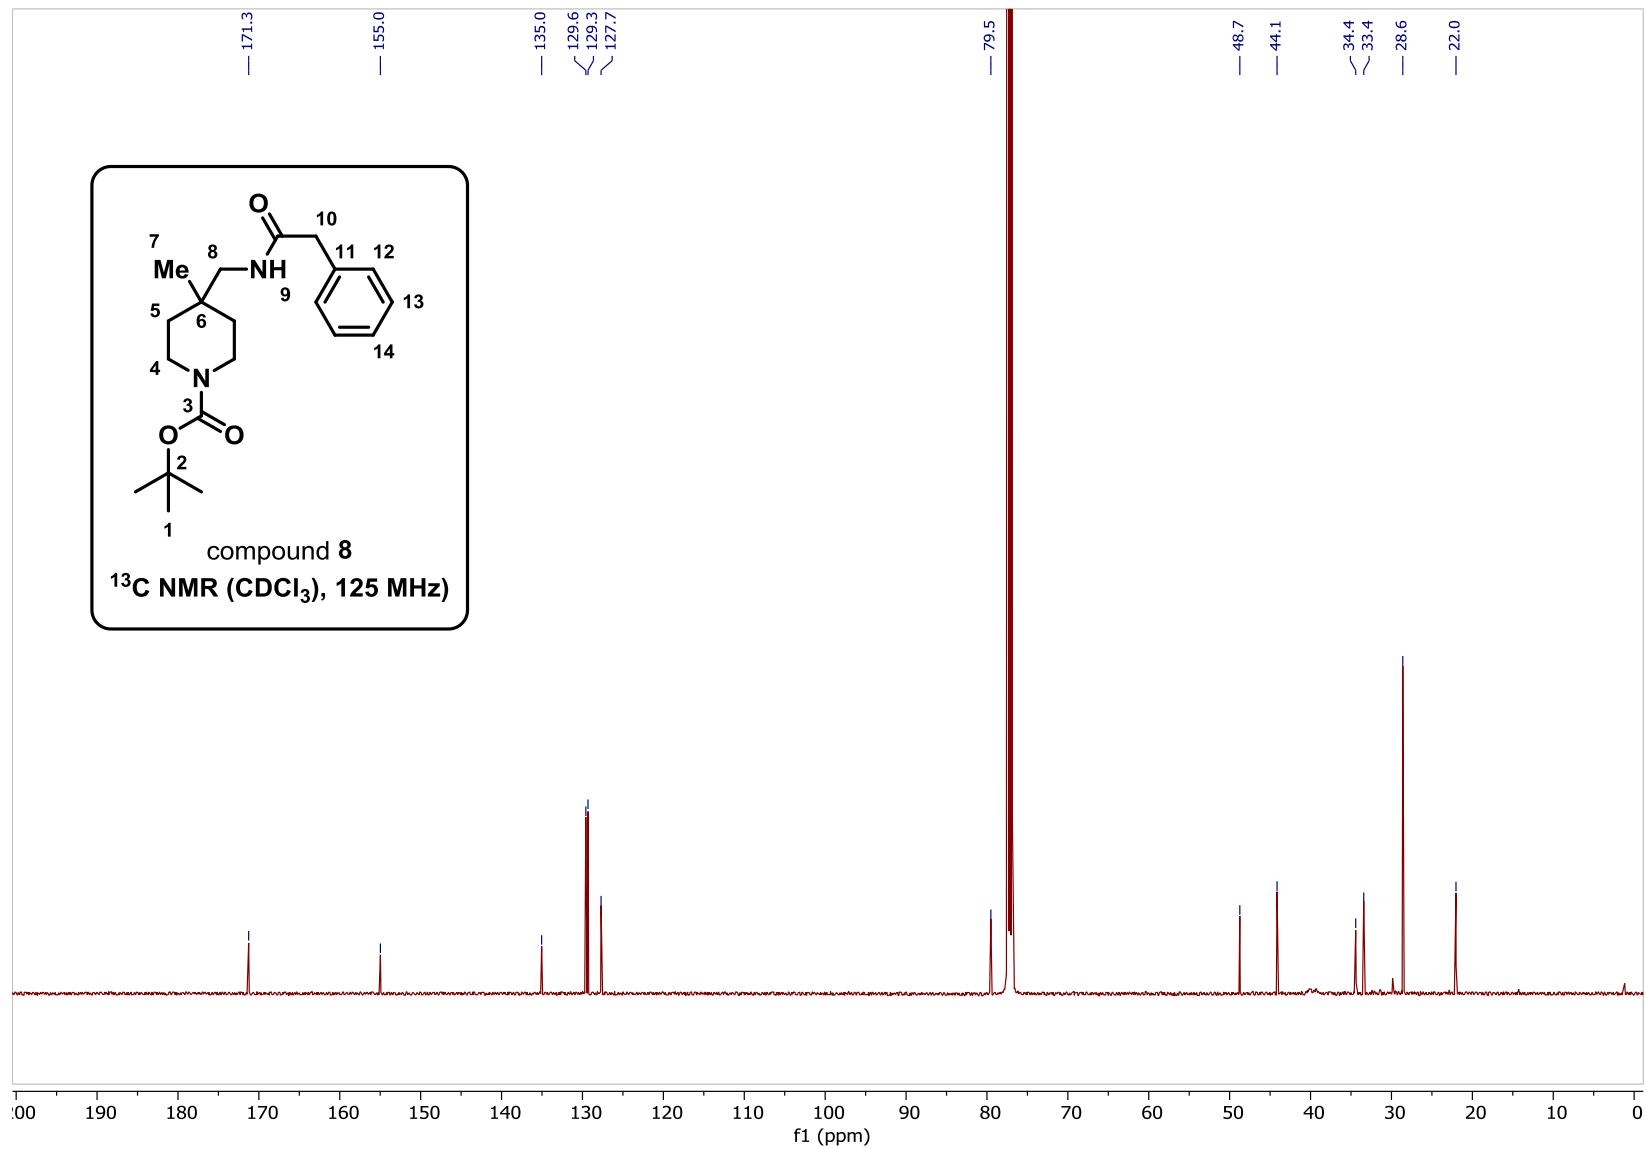

Supplement: SC-010-C8SC05225E-s001.pdf [file SC-010-C8SC05225E-s001.pdf]
